# Supplementary material for: Genome-wide identification and characterization of circular RNAs for exogenous trehalose-mediated heat stress responses in tea plants (Camellia sinensis)
Source: Front Plant Sci. 2024 Dec 5;15:1481169. doi: 10.3389/fpls.2024.1481169 (PMC11655237; doi:10.3389/fpls.2024.1481169)
Supplement: Supplementary Table 1 — Summary of primers used in this study. [file Table1.xls]

## Sheet: Sheet1
	Table S1. List of primers and circRNAs seuqence used in this Study.
Classification	host gene name (ID)	circRNA name (ID)	primer name	primer sequence (5'to3')	purpose
Validation of circRNAs	CsTGY02G0002516	circRNA_01990|Chr02:161514859_161515367_-	divergent_F	CGTGTACTTTGGGTGGGAAG	circRNA detection and qPCR
			divergent_R	GCAAAGCAGGTGGGTAATGT
			convergent_F	ACATTACCCACCTGCTTTGC	linear RNA detection
			convergent_R	CATAAACCTTCCCACCCAAA
	CsTGY04G0000784	circRNA_03241|Chr04:39490728_39496504_-	divergent_F	GCATACGTGGCAGCTACCTT	circRNA detection and qPCR
			divergent_R	TCGAGGACCATCCATACGAT
			convergent_F	ATCTGCCTCGGAGTGATGTC	linear RNA detection
			convergent_R	TTCTCTCCCCAACTGAATGG
	CsTGY09G0000471	circRNA_07063|Chr09:17124724_17125031_+	divergent_F	TAGAGAAGGGCGTGTGGAAG	circRNA detection and qPCR
			divergent_R	TTGTGTAAGCCCAAGTGATCC
			convergent_F	CTTGCTTGTGGATCACTTGG	linear RNA detection
			convergent_R	TTGCTTTGTTTCCCAAACCT
	CsTGY09G0000543	circRNA_07084|Chr09:20213247_20215218_+	divergent_F	CGCCCTGATGTTGTAGAAATG	circRNA detection and qPCR
			divergent_R	CTTCCCTCCCCGATAAAGAC
			convergent_F	ATTGTTCATTGCACCCGTTC	linear RNA detection
			convergent_R	CGCCACCCAAGCATTAGTAT
	CsTGY11G0000775	circRNA_08464|Chr11:61763732_61765808_-	divergent_F	GAAGCTGGTGAAGGTGAGGA	circRNA detection and qPCR
			divergent_R	CTTCCAATAGCCACATTTCCA
			convergent_F	AAGGCAAGAGGGAAGCAGAT	linear RNA detection
			convergent_R	AAGTTTCCTGGGTTGACACG
	CsTGY12G0000574	circRNA_09057|Chr12:49094808_49097570_+	divergent_F	GATACATTGGCAGGGGTTTC	circRNA detection
			divergent_R	GAGCTTCAATTCCGTCAAGC
			convergent_F	CCCAGTTGAAGTCCTTTCCA	linear RNA detection
			convergent_R	ACAGTTTTCAGCCCACAAGG
	CsTGY13G0001634	circRNA_09826|Chr13:119595354_119596789_+	divergent_F	CCAAAACTTTGTGGCATGACT	circRNA detection
			divergent_R	CCAGAATTTCCTCAGCATCC
			convergent_F	GGGTTATGTGGATGCTGAGG	linear RNA detection
			convergent_R	GACTTCCTTGCCACGGATAA
	CsTGY10G0001132	circRNA_07934|Chr10:89662685_89663199_-	divergent_F	CCCTCTCCTATTGAGCCTGA	circRNA detection and qPCR
			divergent_R	TCCTCCTTAGTGGCAGCATT
			convergent_F	GCGGGTTCTGGAAATTGTAA	linear RNA detection
			convergent_R	GGTGCGGATATTTTTGGTTG
	CsTGY09G0001126	circRNA_07195|Chr09:55286042_55288094_+	divergent_F	CATTGCTCTCCACAGATCCA	circRNA detection
			divergent_R	AACAGTTGGGCGAATCAAAG
			convergent_F	CTGGCTTGATTCTGTCACCA	linear RNA detection
			convergent_R	GTGAAAACGCTTTGCAGGTT
	CsTGY01G0000347	circRNA_00121|Chr01:20459200_20459651_-	divergent_F	ATTTCCTTGGGTGATGATGC	circRNA qPCR
			divergent_R	AAGACACGGCACAGGTATCC
	CsTGY12G0002029	circRNA_09379|Chr12:165044262_165044742_+	divergent_F	ATGGTCCTTTCTGCTCTGGA	circRNA qPCR
			divergent_R	TTTCGACAACGCAACAAGAC
	name (ID)	primer sequence	primer sequence (5'to3')	purpose
NHEJ and HR pathways	CsKu70 (CsTGY09G0001126)	CsKu70-F	TTGGATTGGAGGGTGATGAT	qPCR
		CsKu70-R	AACAGTTGGGCGAATCAAAG	qPCR
	CsRad50 (CsTGY05G0001913)	CsRad50-F	AAGCCCTTAACCCTCATCGT	qPCR
		CsRad50-R	TGCCCCTTTGTTTCTGTCTC	qPCR
	CsDnl4 (CsTGY11G0000030)	CsDnl4-F	TGACCGCATTCAAATCCATA	qPCR
		CsDnl4-R	TGTCCCAAACCAACATCTCA	qPCR
	CsMus81(CsTGY03G0001823)	CsMus81-F	TCTGTCCCCCTTTTGATGAG	qPCR
		CsMus81-R	AGAGAGAGCAGCGTTGGGTA	qPCR
	circKU70-1 (circRNA_07193|Chr09:55283721_55284376_+)	circKU70-1 -F	CAAGCCTGATGAGGAGTTCA	qPCR
		circKU70-1-R	GCAACCCACAGAGCATTGTA	qPCR
	circKU70-2 (circRNA_07195|Chr09:55286042_55288094_+)	circKU70-2 -F	CATTGCTCTCCACAGATCCA	qPCR
		circKU70-2 -R	AACAGTTGGGCGAATCAAAG	qPCR
	circKU70-3 (circRNA_07196|Chr09:55293251_55294053_+)	circKU70-3-F	AGGCAAATTGAAGAGCTCCAT	qPCR
		circKU70-3-R	GCAACCAATTGAGGACGAGT	qPCR
	circRad50 (circRNA_04393|Chr05:151158021_151158900_-)	circRad50-F	GCTTTGAACCTCACAAATCG	qPCR
		circRad50-R	CATCCACATTTTGAATGTTTCG	qPCR
	circDnl4 (circRNA_08240|Chr11:1889043_1898558_-)	circDnl4-F	TCCTCCCTTTACAGCCAAAG	qPCR
		circDnl4-R	TCATCGGAAAGTCCAGTTCC	qPCR
	circMus81 (circRNA_02671|Chr03:117015945_117016630_-)	circMus81-F	AAAGCCTGGACAATTTGGAA	qPCR
		circMus81-R	CCTCCTGTTCAGAAACACCA	qPCR
