# Supplementary material for: Genome-wide identification and characterization of circular RNAs for exogenous trehalose-mediated heat stress responses in tea plants (Camellia sinensis)
Source: Front Plant Sci. 2024 Dec 5;15:1481169. doi: 10.3389/fpls.2024.1481169 (PMC11655237; doi:10.3389/fpls.2024.1481169)
Supplement: Supplementary Table 2 — Summary of circRNA-seq data after filtering. [file Table2.xls]

Sample	RawReads	RawBases	CleanReads	CleanBases	ValidBases	Q30	GC
CK-1	117.79M	17.67G	113.10M	16.96G	96.01%	91.52%	44.02%
CK-2	134.47M	20.17G	130.16M	19.52G	96.79%	91.50%	45.71%
CK-3	126.45M	18.97G	121.31M	18.20G	95.94%	91.51%	43.92%
T-1	117.20M	17.58G	113.68M	17.05G	97.00%	91.54%	45.52%
T-2	119.72M	17.96G	115.70M	17.36G	96.65%	91.65%	44.37%
T-3	107.14M	16.07G	103.24M	15.49G	96.36%	91.71%	44.04%
TT-1	125.50M	18.82G	119.94M	17.99G	95.57%	91.54%	44.34%
TT-2	112.49M	16.87G	107.32M	16.10G	95.41%	91.56%	44.14%
TT-3	111.43M	16.71G	106.45M	15.97G	95.53%	92.02%	44.28%
