# Supplementary material for: Genome-wide identification and characterization of circular RNAs for exogenous trehalose-mediated heat stress responses in tea plants (Camellia sinensis)
Source: Front Plant Sci. 2024 Dec 5;15:1481169. doi: 10.3389/fpls.2024.1481169 (PMC11655237; doi:10.3389/fpls.2024.1481169)
Supplement: Supplementary Table 3 — The list of circRNAs identified in this study. [file Table3.xls]

circRNA	partnerRNA_transcript	type
circRNA_00001|Chr01:1367757_1367940_+	CsTGY01G0000007.t1	intronic
circRNA_00002|Chr01:1368270_1369256_+	CsTGY01G0000007.t2	exonic
circRNA_00003|Chr01:1374979_1381975_+	CsTGY01G0000007.t1	exonic
circRNA_00004|Chr01:1377678_1378492_+	CsTGY01G0000007.t1	exonic
circRNA_00005|Chr01:1380060_1380243_+	CsTGY01G0000007.t2	exonic
circRNA_00006|Chr01:1798287_1799194_-	CsTGY01G0000012.t1	exonic
circRNA_00007|Chr01:1827339_1827576_-	CsTGY01G0000013.t1	exonic
circRNA_00008|Chr01:2104986_2105089_-		intergenic
circRNA_00009|Chr01:2105072_2106778_+		intergenic
circRNA_00010|Chr01:2136549_2139059_-	CsTGY01G0000015.t1	exonic
circRNA_00011|Chr01:2386076_2386255_+	CsTGY01G0000017.t1	exonic
circRNA_00012|Chr01:2393051_2393343_-	CsTGY01G0000019.t1	exonic
circRNA_00013|Chr01:2670475_2671902_+	CsTGY01G0000025.t1	antisense
circRNA_00014|Chr01:3052443_3052801_+		intergenic
circRNA_00015|Chr01:3107997_3108606_+	CsTGY01G0000038.t1	exonic
circRNA_00016|Chr01:3405588_3407913_+	CsTGY01G0000047.t1	antisense
circRNA_00017|Chr01:3407813_3408022_-	CsTGY01G0000047.t1	exonic
circRNA_00018|Chr01:3462775_3462940_-	CsTGY01G0000050.t1	exonic
circRNA_00019|Chr01:3477561_3477746_+	CsTGY01G0000051.t1	exonic
circRNA_00020|Chr01:3514410_3514688_+	CsTGY01G0000055.t1	antisense
circRNA_00021|Chr01:3525242_3525493_-	CsTGY01G0000057.t1	exonic
circRNA_00022|Chr01:3586374_3586551_+	CsTGY01G0000058.t1	sense-overlapping
circRNA_00023|Chr01:3805895_3815730_+	CsTGY01G0000062.t1	sense-overlapping
circRNA_00024|Chr01:3807043_3810515_+	CsTGY01G0000062.t1	exonic
circRNA_00025|Chr01:3807043_3810882_+	CsTGY01G0000062.t1	exonic
circRNA_00026|Chr01:3807073_3810882_+	CsTGY01G0000062.t1	exonic
circRNA_00027|Chr01:3809970_3810515_+	CsTGY01G0000062.t1	exonic
circRNA_00028|Chr01:3809970_3810882_+	CsTGY01G0000062.t1	exonic
circRNA_00029|Chr01:3814010_3815730_+	CsTGY01G0000062.t1	sense-overlapping
circRNA_00030|Chr01:3838559_3838722_-	CsTGY01G0000063.t1	exonic
circRNA_00031|Chr01:3839762_3840153_-	CsTGY01G0000063.t1	exonic
circRNA_00032|Chr01:3841617_3841833_-	CsTGY01G0000063.t1	exonic
circRNA_00033|Chr01:3960571_3960729_-	CsTGY01G0000066.t1	antisense
circRNA_00034|Chr01:4392989_4393360_+	CsTGY01G0000079.t1	exonic
circRNA_00035|Chr01:4560144_4560389_-	CsTGY01G0000088.t1	exonic
circRNA_00036|Chr01:4615597_4615752_-	CsTGY01G0000090.t1	antisense
circRNA_00037|Chr01:5041016_5047529_+	CsTGY01G0000094.t1	exonic
circRNA_00038|Chr01:5047151_5047529_+	CsTGY01G0000094.t1	exonic
circRNA_00039|Chr01:5059179_5059379_+	CsTGY01G0000095.t1	exonic
circRNA_00040|Chr01:5067838_5071215_-	CsTGY01G0000096.t1	antisense
circRNA_00041|Chr01:5068895_5069075_+	CsTGY01G0000096.t1	exonic
circRNA_00042|Chr01:5068895_5070012_+	CsTGY01G0000096.t1	exonic
circRNA_00043|Chr01:5072422_5072591_+	CsTGY01G0000096.t1	exonic
circRNA_00044|Chr01:5198024_5198215_+	CsTGY01G0000099.t1	exonic
circRNA_00045|Chr01:5581368_5582145_+	CsTGY01G0000106.t1	exonic
circRNA_00046|Chr01:6646663_6648752_+	CsTGY01G0000118.t1	exonic
circRNA_00047|Chr01:6646663_6649794_+	CsTGY01G0000118.t1	exonic
circRNA_00048|Chr01:6646663_6650475_+	CsTGY01G0000118.t1	exonic
circRNA_00049|Chr01:6648433_6648752_+	CsTGY01G0000118.t1	exonic
circRNA_00050|Chr01:6648433_6649794_+	CsTGY01G0000118.t1	exonic
circRNA_00051|Chr01:6658815_6659465_-	CsTGY01G0000118.t1	antisense
circRNA_00052|Chr01:6674454_6674981_+	CsTGY01G0000119.t1	exonic
circRNA_00053|Chr01:6677620_6677780_+	CsTGY01G0000119.t1	exonic
circRNA_00054|Chr01:6678662_6678937_+	CsTGY01G0000119.t1	exonic
circRNA_00055|Chr01:6679013_6679140_+	CsTGY01G0000119.t1	exonic
circRNA_00056|Chr01:6679141_6679290_-	CsTGY01G0000119.t1	antisense
circRNA_00057|Chr01:6923917_6924097_-	CsTGY01G0000129.t1	antisense
circRNA_00058|Chr01:6923984_6924372_+	CsTGY01G0000129.t1	exonic
circRNA_00059|Chr01:10098213_10098413_-	CsTGY01G0000148.t1	antisense
circRNA_00060|Chr01:10204575_10210611_-		intergenic
circRNA_00061|Chr01:10312933_10313490_-	CsTGY01G0000152.t1	exonic
circRNA_00062|Chr01:10327405_10327801_-	CsTGY01G0000153.t2	exonic
circRNA_00063|Chr01:10381859_10382020_-	CsTGY01G0000155.t1	antisense
circRNA_00064|Chr01:10381979_10382078_+	CsTGY01G0000155.t1	exonic
circRNA_00065|Chr01:10447342_10449133_-	CsTGY01G0000158.t1	exonic
circRNA_00066|Chr01:12013541_12013950_+	CsTGY01G0000182.t1	exonic
circRNA_00067|Chr01:12363672_12374880_-	CsTGY01G0000189.t1	exonic
circRNA_00068|Chr01:12366688_12367807_-	CsTGY01G0000189.t1	exonic
circRNA_00069|Chr01:13047167_13047372_-	CsTGY01G0000201.t1	exonic
circRNA_00070|Chr01:13047301_13047476_-	CsTGY01G0000201.t1	exonic
circRNA_00071|Chr01:13048853_13049041_-	CsTGY01G0000201.t1	exonic
circRNA_00072|Chr01:13049124_13049400_-	CsTGY01G0000201.t1	exonic
circRNA_00073|Chr01:13049225_13049395_-	CsTGY01G0000201.t1	exonic
circRNA_00074|Chr01:13049273_13049797_-	CsTGY01G0000201.t1	exonic
circRNA_00075|Chr01:13049291_13049761_+	CsTGY01G0000201.t1	antisense
circRNA_00076|Chr01:13049958_13051131_-	CsTGY01G0000201.t1	exonic
circRNA_00077|Chr01:13336584_13336772_-		intergenic
circRNA_00078|Chr01:13802277_13805836_+	CsTGY01G0000214.t2	antisense
circRNA_00079|Chr01:13805709_13806137_-	CsTGY01G0000214.t2	exonic
circRNA_00080|Chr01:13813843_13825350_+		intergenic
circRNA_00081|Chr01:13831351_13831532_+	CsTGY01G0000215.t1	antisense
circRNA_00082|Chr01:13835310_13835499_-		intergenic
circRNA_00083|Chr01:14668110_14671247_+	CsTGY01G0000234.t1	exonic
circRNA_00084|Chr01:14673210_14673368_-	CsTGY01G0000235.t1	exonic
circRNA_00085|Chr01:14756436_14763002_-	CsTGY01G0000238.t1	exonic
circRNA_00086|Chr01:14837410_14837620_+		intergenic
circRNA_00087|Chr01:14888133_14888306_+		intergenic
circRNA_00088|Chr01:17612982_17614219_-	CsTGY01G0000267.t1	exonic
circRNA_00089|Chr01:17612982_17619574_-	CsTGY01G0000267.t1	exonic
circRNA_00090|Chr01:17623263_17625500_-	CsTGY01G0000267.t1	exonic
circRNA_00091|Chr01:18781100_18803040_+	CsTGY01G0000293.t1	antisense
circRNA_00092|Chr01:18781808_18803684_+	CsTGY01G0000293.t1	antisense
circRNA_00093|Chr01:18799011_18799178_-	CsTGY01G0000293.t1	exonic
circRNA_00094|Chr01:18799023_18799216_-	CsTGY01G0000293.t1	exonic
circRNA_00095|Chr01:18801613_18818687_-	CsTGY01G0000294.t1	antisense
circRNA_00096|Chr01:18801613_18818690_-	CsTGY01G0000294.t1	antisense
circRNA_00097|Chr01:18898925_18899110_+	CsTGY01G0000298.t1	exonic
circRNA_00098|Chr01:18899875_18900176_+	CsTGY01G0000298.t1	exonic
circRNA_00099|Chr01:18933325_18934379_-	CsTGY01G0000299.t1	exonic
circRNA_00100|Chr01:19025380_19025580_-	CsTGY01G0000300.t1	exonic
circRNA_00101|Chr01:19192700_19195308_-	CsTGY01G0000305.t1	exonic
circRNA_00102|Chr01:19391368_19393795_-	CsTGY01G0000313.t1	exonic
circRNA_00103|Chr01:19457196_19457370_-	CsTGY01G0000314.t1	exonic
circRNA_00104|Chr01:19462335_19462545_+	CsTGY01G0000314.t1	antisense
circRNA_00105|Chr01:19652481_19652964_+	CsTGY01G0000320.t1	exonic
circRNA_00106|Chr01:19653539_19670254_+	CsTGY01G0000320.t1	exonic
circRNA_00107|Chr01:19661405_19670254_+	CsTGY01G0000320.t1	exonic
circRNA_00108|Chr01:20002614_20003681_-	CsTGY01G0000328.t1	exonic
circRNA_00109|Chr01:20007379_20007532_-	CsTGY01G0000328.t1	exonic
circRNA_00110|Chr01:20105674_20105994_-	CsTGY01G0000331.t1	exonic
circRNA_00111|Chr01:20169718_20170375_+	CsTGY01G0000334.t1	exonic
circRNA_00112|Chr01:20171404_20171555_+	CsTGY01G0000334.t1	exonic
circRNA_00113|Chr01:20455052_20455228_-	CsTGY01G0000347.t1	exonic
circRNA_00114|Chr01:20456888_20457031_-	CsTGY01G0000347.t1	exonic
circRNA_00115|Chr01:20457110_20457262_-	CsTGY01G0000347.t1	exonic
circRNA_00116|Chr01:20457298_20457477_+	CsTGY01G0000347.t1	antisense
circRNA_00117|Chr01:20457632_20459651_-	CsTGY01G0000347.t1	exonic
circRNA_00118|Chr01:20457793_20459651_-	CsTGY01G0000347.t1	exonic
circRNA_00119|Chr01:20458951_20459651_-	CsTGY01G0000347.t1	exonic
circRNA_00120|Chr01:20459192_20459651_-	CsTGY01G0000347.t1	exonic
circRNA_00121|Chr01:20459200_20459651_-	CsTGY01G0000347.t1	exonic
circRNA_00122|Chr01:20459360_20459651_-	CsTGY01G0000347.t1	exonic
circRNA_00123|Chr01:20459502_20459651_-	CsTGY01G0000347.t1	exonic
circRNA_00124|Chr01:20635721_20635872_-	CsTGY01G0000350.t1	intronic
circRNA_00125|Chr01:20643353_20643586_-	CsTGY01G0000350.t1	intronic
circRNA_00126|Chr01:20816552_20816830_+	CsTGY01G0000356.t1	antisense
circRNA_00127|Chr01:20817410_20817610_+	CsTGY01G0000356.t1	antisense
circRNA_00128|Chr01:20876182_20876346_-	CsTGY01G0000360.t1	exonic
circRNA_00129|Chr01:20878063_20878229_-	CsTGY01G0000360.t1	exonic
circRNA_00130|Chr01:21301278_21301618_+	CsTGY01G0000366.t1	exonic
circRNA_00131|Chr01:21301278_21302275_+	CsTGY01G0000366.t2	exonic
circRNA_00132|Chr01:21507304_21507492_-	CsTGY01G0000372.t1	exonic
circRNA_00133|Chr01:21538371_21539756_-	CsTGY01G0000374.t1	exonic
circRNA_00134|Chr01:21539015_21539797_-	CsTGY01G0000374.t1	exonic
circRNA_00135|Chr01:21539222_21539797_-	CsTGY01G0000374.t1	exonic
circRNA_00136|Chr01:21539683_21546019_-	CsTGY01G0000374.t1	exonic
circRNA_00137|Chr01:21539683_21548557_-	CsTGY01G0000374.t1	exonic
circRNA_00138|Chr01:21547230_21548557_-	CsTGY01G0000374.t1	exonic
circRNA_00139|Chr01:21922174_21922358_-	CsTGY01G0000381.t1	exonic
circRNA_00140|Chr01:22026497_22026678_+	CsTGY01G0000383.t1	exonic
circRNA_00141|Chr01:22237137_22237321_-	CsTGY01G0000388.t1	antisense
circRNA_00142|Chr01:22331370_22331557_-		intergenic
circRNA_00143|Chr01:22337295_22337437_-		intergenic
circRNA_00144|Chr01:22337596_22338051_+		intergenic
circRNA_00145|Chr01:22341303_22341668_-		intergenic
circRNA_00146|Chr01:22521051_22521213_-	CsTGY01G0000395.t1	intronic
circRNA_00147|Chr01:22556226_22556420_-	CsTGY01G0000397.t1	exonic
circRNA_00148|Chr01:22654759_22654931_-		intergenic
circRNA_00149|Chr01:22729208_22729441_+	CsTGY01G0000402.t1	intronic
circRNA_00150|Chr01:23160295_23160843_+	CsTGY01G0000410.t1	antisense
circRNA_00151|Chr01:23162632_23162831_+	CsTGY01G0000410.t1	antisense
circRNA_00152|Chr01:23306388_23306958_+	CsTGY01G0000414.t1	exonic
circRNA_00153|Chr01:23306407_23306958_+	CsTGY01G0000414.t1	exonic
circRNA_00154|Chr01:23306448_23306958_+	CsTGY01G0000414.t1	exonic
circRNA_00155|Chr01:23350103_23350339_+	CsTGY01G0000415.t1	exonic
circRNA_00156|Chr01:23358007_23358164_+	CsTGY01G0000415.t1	exonic
circRNA_00157|Chr01:23505041_23505201_+	CsTGY01G0000419.t1	exonic
circRNA_00158|Chr01:23513396_23513661_+	CsTGY01G0000419.t1	exonic
circRNA_00159|Chr01:23515309_23515465_+	CsTGY01G0000419.t1	exonic
circRNA_00160|Chr01:23515358_23515525_+	CsTGY01G0000419.t1	exonic
circRNA_00161|Chr01:23637750_23658411_-	CsTGY01G0000427.t1	exonic
circRNA_00162|Chr01:23687032_23687568_-	CsTGY01G0000428.t1	exonic
circRNA_00163|Chr01:24289189_24291721_-	CsTGY01G0000441.t1	exonic
circRNA_00164|Chr01:24339515_24339712_-	CsTGY01G0000442.t1	exonic
circRNA_00165|Chr01:24341237_24341395_-	CsTGY01G0000442.t1	exonic
circRNA_00166|Chr01:24341288_24341477_+	CsTGY01G0000442.t1	antisense
circRNA_00167|Chr01:24341427_24341572_-	CsTGY01G0000442.t1	exonic
circRNA_00168|Chr01:24342509_24342671_-	CsTGY01G0000442.t1	exonic
circRNA_00169|Chr01:24343130_24343420_-	CsTGY01G0000442.t1	exonic
circRNA_00170|Chr01:26544415_26545025_+	CsTGY01G0000471.t1	exonic
circRNA_00171|Chr01:26862000_26862144_+	CsTGY01G0000481.t1	exonic
circRNA_00172|Chr01:26901319_26904699_-	CsTGY01G0000484.t1	exonic
circRNA_00173|Chr01:26905451_26906110_-	CsTGY01G0000484.t1	exonic
circRNA_00174|Chr01:26912600_26915170_-	CsTGY01G0000484.t1	intronic
circRNA_00175|Chr01:27115204_27115342_-	CsTGY01G0000486.t1	antisense
circRNA_00176|Chr01:27175912_27178083_+		intergenic
circRNA_00177|Chr01:27275046_27275258_+	CsTGY01G0000489.t1	intronic
circRNA_00178|Chr01:27275394_27275724_+	CsTGY01G0000489.t1	intronic
circRNA_00179|Chr01:27279139_27282572_+	CsTGY01G0000489.t1	exonic
circRNA_00180|Chr01:27531950_27535358_+		intergenic
circRNA_00181|Chr01:27843570_27843710_-	CsTGY01G0000504.t1	exonic
circRNA_00182|Chr01:28018306_28018557_-	CsTGY01G0000511.t1	exonic
circRNA_00183|Chr01:28112888_28113440_+	CsTGY01G0000512.t1	exonic
circRNA_00184|Chr01:28117487_28122255_+	CsTGY01G0000512.t1	exonic
circRNA_00185|Chr01:28972588_28973944_+		intergenic
circRNA_00186|Chr01:29082163_29082267_+	CsTGY01G0000533.t1	exonic
circRNA_00187|Chr01:29173480_29180555_+	CsTGY01G0000536.t1	exonic
circRNA_00188|Chr01:29405013_29405345_-	CsTGY01G0000538.t1	exonic
circRNA_00189|Chr01:29405419_29405645_-	CsTGY01G0000538.t1	exonic
circRNA_00190|Chr01:29406389_29406549_-	CsTGY01G0000538.t1	exonic
circRNA_00191|Chr01:29609744_29609898_-	CsTGY01G0000542.t1	exonic
circRNA_00192|Chr01:29629316_29629499_-	CsTGY01G0000543.t1	exonic
circRNA_00193|Chr01:29632295_29634955_-	CsTGY01G0000543.t2	exonic
circRNA_00194|Chr01:29634870_29635039_-	CsTGY01G0000543.t1	exonic
circRNA_00195|Chr01:29722152_29722324_+	CsTGY01G0000547.t1	antisense
circRNA_00196|Chr01:29821600_29822505_-	CsTGY01G0000553.t1	exonic
circRNA_00197|Chr01:31018645_31018844_-	CsTGY01G0000577.t1	exonic
circRNA_00198|Chr01:31018951_31019179_+	CsTGY01G0000577.t1	antisense
circRNA_00199|Chr01:31019425_31019598_-	CsTGY01G0000577.t1	exonic
circRNA_00200|Chr01:34118873_34119160_+	CsTGY01G0000620.t1	exonic
circRNA_00201|Chr01:34488495_34489456_-	CsTGY01G0000627.t1	exonic
circRNA_00202|Chr01:34884805_34885000_+	CsTGY01G0000634.t1	antisense
circRNA_00203|Chr01:35262024_35262420_+		intergenic
circRNA_00204|Chr01:35291616_35291805_+	CsTGY01G0000640.t1	exonic
circRNA_00205|Chr01:36074482_36075405_+		intergenic
circRNA_00206|Chr01:36122402_36122611_+	CsTGY01G0000652.t1	exonic
circRNA_00207|Chr01:36122931_36123135_-	CsTGY01G0000652.t1	antisense
circRNA_00208|Chr01:36122984_36123241_-	CsTGY01G0000652.t1	antisense
circRNA_00209|Chr01:36226227_36226416_-	CsTGY01G0000655.t1	exonic
circRNA_00210|Chr01:36348443_36348692_+	CsTGY01G0000658.t2	exonic
circRNA_00211|Chr01:36365879_36366025_-	CsTGY01G0000659.t2	antisense
circRNA_00212|Chr01:36367418_36367546_+	CsTGY01G0000660.t1	antisense
circRNA_00213|Chr01:36370120_36370310_+	CsTGY01G0000660.t1	antisense
circRNA_00214|Chr01:36441993_36442313_-	CsTGY01G0000661.t1	antisense
circRNA_00215|Chr01:36442186_36442361_+	CsTGY01G0000661.t1	exonic
circRNA_00216|Chr01:36615774_36616318_+	CsTGY01G0000667.t1	exonic
circRNA_00217|Chr01:36757512_36757687_-	CsTGY01G0000670.t1	intronic
circRNA_00218|Chr01:36764614_36798938_-	CsTGY01G0000671.t2	antisense
circRNA_00219|Chr01:36766520_36799569_-	CsTGY01G0000671.t2	antisense
circRNA_00220|Chr01:36766520_36799587_-	CsTGY01G0000671.t2	antisense
circRNA_00221|Chr01:36782327_36856422_+	CsTGY01G0000672.t1	sense-overlapping
circRNA_00222|Chr01:37442424_37442608_+	CsTGY01G0000684.t1	antisense
circRNA_00223|Chr01:39279875_39280015_-	CsTGY01G0000697.t1	exonic
circRNA_00224|Chr01:39506831_39507005_-	CsTGY01G0000701.t1	sense-overlapping
circRNA_00225|Chr01:39507006_39582251_-	CsTGY01G0000703.t1	sense-overlapping
circRNA_00226|Chr01:39582149_39582307_-	CsTGY01G0000704.t1	exonic
circRNA_00227|Chr01:39756746_39756935_-	CsTGY01G0000706.t1	exonic
circRNA_00228|Chr01:39756770_39756983_+	CsTGY01G0000706.t1	antisense
circRNA_00229|Chr01:39756777_39756967_-	CsTGY01G0000706.t1	exonic
circRNA_00230|Chr01:39756788_39757045_-	CsTGY01G0000706.t1	exonic
circRNA_00231|Chr01:39756834_39757013_-	CsTGY01G0000706.t1	exonic
circRNA_00232|Chr01:39756908_39757045_-	CsTGY01G0000706.t1	exonic
circRNA_00233|Chr01:40202265_40202435_+	CsTGY01G0000712.t1	exonic
circRNA_00234|Chr01:40202551_40202729_+	CsTGY01G0000712.t1	exonic
circRNA_00235|Chr01:40206483_40206707_-		intergenic
circRNA_00236|Chr01:40227901_40228710_+	CsTGY01G0000713.t1	exonic
circRNA_00237|Chr01:40281543_40285223_+	CsTGY01G0000714.t1	exonic
circRNA_00238|Chr01:40281543_40287003_+	CsTGY01G0000714.t1	exonic
circRNA_00239|Chr01:40282920_40286776_+	CsTGY01G0000714.t1	exonic
circRNA_00240|Chr01:40311696_40311880_-	CsTGY01G0000715.t1	antisense
circRNA_00241|Chr01:40314864_40315092_+	CsTGY01G0000716.t1	exonic
circRNA_00242|Chr01:40315216_40317165_+	CsTGY01G0000716.t1	exonic
circRNA_00243|Chr01:40435068_40478596_-	CsTGY01G0000723.t1	sense-overlapping
circRNA_00244|Chr01:40449802_40449982_+	CsTGY01G0000723.t1	antisense
circRNA_00245|Chr01:40449837_40449986_+	CsTGY01G0000723.t1	antisense
circRNA_00246|Chr01:40491362_40492142_+	CsTGY01G0000724.t1	exonic
circRNA_00247|Chr01:40618478_40618651_-	CsTGY01G0000727.t1	exonic
circRNA_00248|Chr01:43713324_43713478_-	CsTGY01G0000752.t1	exonic
circRNA_00249|Chr01:43715558_43715772_-	CsTGY01G0000752.t1	exonic
circRNA_00250|Chr01:43870492_43870641_-	CsTGY01G0000755.t1	exonic
circRNA_00251|Chr01:43870694_43870894_+	CsTGY01G0000755.t1	antisense
circRNA_00252|Chr01:43871099_43871228_+	CsTGY01G0000755.t1	antisense
circRNA_00253|Chr01:43998248_43999301_+	CsTGY01G0000757.t1	exonic
circRNA_00254|Chr01:48146671_48148708_-	CsTGY01G0000793.t1	antisense
circRNA_00255|Chr01:48146725_48146909_-	CsTGY01G0000793.t1	antisense
circRNA_00256|Chr01:48673568_48674142_+	CsTGY01G0000801.t1	exonic
circRNA_00257|Chr01:48673628_48673795_+	CsTGY01G0000801.t1	exonic
circRNA_00258|Chr01:48936979_48937186_+	CsTGY01G0000807.t2	exonic
circRNA_00259|Chr01:48979386_48979542_-		intergenic
circRNA_00260|Chr01:49791725_49792024_+	CsTGY01G0000813.t1	antisense
circRNA_00261|Chr01:49821867_49822056_-	CsTGY01G0000814.t1	exonic
circRNA_00262|Chr01:49838549_49842066_-	CsTGY01G0000814.t1	exonic
circRNA_00263|Chr01:49839010_49839275_+	CsTGY01G0000814.t1	antisense
circRNA_00264|Chr01:50451372_50451576_+	CsTGY01G0000823.t1	exonic
circRNA_00265|Chr01:50458604_50458831_+	CsTGY01G0000823.t1	exonic
circRNA_00266|Chr01:50463034_50463436_+	CsTGY01G0000823.t1	exonic
circRNA_00267|Chr01:50463515_50463793_+	CsTGY01G0000823.t1	exonic
circRNA_00268|Chr01:50999919_51000032_+	CsTGY01G0000839.t1	exonic
circRNA_00269|Chr01:51127658_51140279_-		intergenic
circRNA_00270|Chr01:51618020_51619395_-	CsTGY01G0000851.t1	exonic
circRNA_00271|Chr01:51624807_51626967_-	CsTGY01G0000851.t1	exonic
circRNA_00272|Chr01:51628876_51629038_+	CsTGY01G0000851.t1	antisense
circRNA_00273|Chr01:51633042_51633306_-	CsTGY01G0000851.t1	exonic
circRNA_00274|Chr01:52283332_52283498_-	CsTGY01G0000857.t1	exonic
circRNA_00275|Chr01:52284004_52284285_-	CsTGY01G0000857.t1	exonic
circRNA_00276|Chr01:52293619_52293791_-	CsTGY01G0000857.t1	exonic
circRNA_00277|Chr01:53887652_53887899_+		intergenic
circRNA_00278|Chr01:54843001_54843182_-	CsTGY01G0000874.t1	intronic
circRNA_00279|Chr01:54843370_54843562_-	CsTGY01G0000874.t1	intronic
circRNA_00280|Chr01:55068761_55068974_-	CsTGY01G0000877.t1	exonic
circRNA_00281|Chr01:56556845_56557082_-	CsTGY01G0000895.t1	antisense
circRNA_00282|Chr01:56837374_56837528_+	CsTGY01G0000901.t1	exonic
circRNA_00283|Chr01:56886856_56887279_+	CsTGY01G0000904.t1	antisense
circRNA_00284|Chr01:57212908_57213094_+		intergenic
circRNA_00285|Chr01:58602398_58602671_-	CsTGY01G0000938.t1	exonic
circRNA_00286|Chr01:58652387_58672367_-	CsTGY01G0000939.t1	exonic
circRNA_00287|Chr01:58668579_58670432_-	CsTGY01G0000939.t1	exonic
circRNA_00288|Chr01:58668579_58675603_-	CsTGY01G0000939.t1	exonic
circRNA_00289|Chr01:58669233_58670432_-	CsTGY01G0000939.t1	exonic
circRNA_00290|Chr01:58675059_58675563_-	CsTGY01G0000939.t1	exonic
circRNA_00291|Chr01:58736289_58737988_-	CsTGY01G0000941.t1	exonic
circRNA_00292|Chr01:58852806_58852936_+	CsTGY01G0000942.t1	exonic
circRNA_00293|Chr01:59432166_59434584_-	CsTGY01G0000954.t1	exonic
circRNA_00294|Chr01:60069484_60069667_+	CsTGY01G0000963.t1	exonic
circRNA_00295|Chr01:66320405_66320938_+	CsTGY01G0001045.t1	exonic
circRNA_00296|Chr01:67047982_67048117_+	CsTGY01G0001052.t1	sense-overlapping
circRNA_00297|Chr01:67060951_67064569_-	CsTGY01G0001053.t1	exonic
circRNA_00298|Chr01:67210715_67212802_+	CsTGY01G0001055.t1	exonic
circRNA_00299|Chr01:67226418_67226639_+	CsTGY01G0001055.t1	exonic
circRNA_00300|Chr01:67268253_67274605_+	CsTGY01G0001056.t1	exonic
circRNA_00301|Chr01:72728796_72728903_+	CsTGY01G0001122.t1	exonic
circRNA_00302|Chr01:73015594_73015755_+	CsTGY01G0001124.t1	intronic
circRNA_00303|Chr01:73373505_73375035_+	CsTGY01G0001131.t1	exonic
circRNA_00304|Chr01:73616697_73616901_+		intergenic
circRNA_00305|Chr01:73616697_73644486_+	CsTGY01G0001138.t1	sense-overlapping
circRNA_00306|Chr01:73644140_73646279_+	CsTGY01G0001138.t1	exonic
circRNA_00307|Chr01:73645955_73646279_+	CsTGY01G0001138.t1	exonic
circRNA_00308|Chr01:73743334_73743583_+	CsTGY01G0001140.t1	exonic
circRNA_00309|Chr01:74505455_74505897_-	CsTGY01G0001150.t1	exonic
circRNA_00310|Chr01:74606787_74606944_+	CsTGY01G0001152.t1	exonic
circRNA_00311|Chr01:74846754_74846922_+	CsTGY01G0001156.t1	intronic
circRNA_00312|Chr01:74846958_74847172_+	CsTGY01G0001156.t1	intronic
circRNA_00313|Chr01:75007256_75007416_-	CsTGY01G0001160.t2	antisense
circRNA_00314|Chr01:75007325_75007617_-	CsTGY01G0001160.t1	antisense
circRNA_00315|Chr01:76287830_76293954_-	CsTGY01G0001171.t1	sense-overlapping
circRNA_00316|Chr01:76287830_76294491_-	CsTGY01G0001171.t1	sense-overlapping
circRNA_00317|Chr01:76287830_76299340_-	CsTGY01G0001171.t1	sense-overlapping
circRNA_00318|Chr01:80510483_80510985_+	CsTGY01G0001208.t1	exonic
circRNA_00319|Chr01:80511011_80511150_+	CsTGY01G0001208.t1	exonic
circRNA_00320|Chr01:80993377_80993659_+		intergenic
circRNA_00321|Chr01:80993514_80993861_-		intergenic
circRNA_00322|Chr01:82986074_82987155_+	CsTGY01G0001238.t1	exonic
circRNA_00323|Chr01:83027907_83028694_+	CsTGY01G0001238.t1	exonic
circRNA_00324|Chr01:83044912_83046467_+	CsTGY01G0001238.t1	exonic
circRNA_00325|Chr01:84646644_84646926_-		intergenic
circRNA_00326|Chr01:90052683_90052925_+	CsTGY01G0001285.t1	sense-overlapping
circRNA_00327|Chr01:90687426_90700347_-	CsTGY01G0001288.t1	exonic
circRNA_00328|Chr01:90687826_90719618_-	CsTGY01G0001288.t1	exonic
circRNA_00329|Chr01:90699959_90700347_-	CsTGY01G0001288.t1	exonic
circRNA_00330|Chr01:90717259_90717523_-	CsTGY01G0001288.t1	intronic
circRNA_00331|Chr01:94841590_94850170_-		intergenic
circRNA_00332|Chr01:94841590_94863224_-		intergenic
circRNA_00333|Chr01:94867047_94867265_-		intergenic
circRNA_00334|Chr01:97287189_97288317_-	CsTGY01G0001336.t2	exonic
circRNA_00335|Chr01:104252645_104252821_-	CsTGY01G0001371.t2	intronic
circRNA_00336|Chr01:108095911_108096090_+		intergenic
circRNA_00337|Chr01:109383154_109383521_-		intergenic
circRNA_00338|Chr01:109414693_109414972_-	CsTGY01G0001418.t1	intronic
circRNA_00339|Chr01:113557387_113561818_-	CsTGY01G0001456.t1	exonic
circRNA_00340|Chr01:113557727_113561818_-	CsTGY01G0001456.t1	exonic
circRNA_00341|Chr01:113557727_113580018_-	CsTGY01G0001456.t1	exonic
circRNA_00342|Chr01:113559950_113563921_-	CsTGY01G0001456.t1	exonic
circRNA_00343|Chr01:113559950_113580018_-	CsTGY01G0001456.t1	exonic
circRNA_00344|Chr01:113563815_113580018_-	CsTGY01G0001456.t1	exonic
circRNA_00345|Chr01:113563815_113582472_-	CsTGY01G0001456.t1	exonic
circRNA_00346|Chr01:113563815_113624860_-	CsTGY01G0001456.t1	exonic
circRNA_00347|Chr01:113571788_113580018_-	CsTGY01G0001456.t1	exonic
circRNA_00348|Chr01:113579915_113584843_-	CsTGY01G0001456.t1	exonic
circRNA_00349|Chr01:113579915_113597131_-	CsTGY01G0001456.t1	exonic
circRNA_00350|Chr01:113581355_113581513_-	CsTGY01G0001456.t1	intronic
circRNA_00351|Chr01:113608599_113610024_-	CsTGY01G0001456.t1	exonic
circRNA_00352|Chr01:113608599_113611382_-	CsTGY01G0001456.t1	exonic
circRNA_00353|Chr01:113608599_113624860_-	CsTGY01G0001456.t1	exonic
circRNA_00354|Chr01:113608599_113627835_-	CsTGY01G0001456.t1	exonic
circRNA_00355|Chr01:113608599_113668644_-	CsTGY01G0001457.t1	sense-overlapping
circRNA_00356|Chr01:113613505_113624860_-	CsTGY01G0001456.t1	exonic
circRNA_00357|Chr01:113613505_113627835_-	CsTGY01G0001456.t1	exonic
circRNA_00358|Chr01:113664555_113665094_-	CsTGY01G0001457.t1	exonic
circRNA_00359|Chr01:113664555_113668644_-	CsTGY01G0001457.t1	exonic
circRNA_00360|Chr01:114334818_114334924_+	CsTGY01G0001462.t1	exonic
circRNA_00361|Chr01:115468793_115469073_+	CsTGY01G0001472.t1	exonic
circRNA_00362|Chr01:115470300_115470563_+	CsTGY01G0001472.t1	exonic
circRNA_00363|Chr01:115470534_115470692_+	CsTGY01G0001472.t1	exonic
circRNA_00364|Chr01:115887313_115889203_+	CsTGY01G0001476.t1	sense-overlapping
circRNA_00365|Chr01:115984066_115984242_+	CsTGY01G0001480.t1	exonic
circRNA_00366|Chr01:115984159_115984308_+	CsTGY01G0001480.t1	exonic
circRNA_00367|Chr01:116048221_116052714_+	CsTGY01G0001481.t1	exonic
circRNA_00368|Chr01:116048221_116053405_+	CsTGY01G0001481.t1	exonic
circRNA_00369|Chr01:116052481_116053405_+	CsTGY01G0001481.t1	exonic
circRNA_00370|Chr01:116052606_116053310_-	CsTGY01G0001481.t1	antisense
circRNA_00371|Chr01:116521537_116544490_+	CsTGY01G0001486.t1	exonic
circRNA_00372|Chr01:116690607_116690879_+	CsTGY01G0001487.t1	exonic
circRNA_00373|Chr01:118232474_118268166_+	CsTGY01G0001496.t1	antisense
circRNA_00374|Chr01:118466872_118467632_+	CsTGY01G0001498.t1	exonic
circRNA_00375|Chr01:118467668_118467840_+	CsTGY01G0001498.t1	exonic
circRNA_00376|Chr01:118906141_118908442_-	CsTGY01G0001504.t1	exonic
circRNA_00377|Chr01:119766387_119766681_-	CsTGY01G0001518.t1	exonic
circRNA_00378|Chr01:119766387_119766705_-	CsTGY01G0001518.t1	exonic
circRNA_00379|Chr01:121478576_121478747_-	CsTGY01G0001533.t1	exonic
circRNA_00380|Chr01:122062748_122063791_+	CsTGY01G0001538.t1	exonic
circRNA_00381|Chr01:122063013_122063215_+	CsTGY01G0001538.t1	exonic
circRNA_00382|Chr01:123386302_123386701_-	CsTGY01G0001551.t1	exonic
circRNA_00383|Chr01:126937344_126937640_+	CsTGY01G0001599.t1	exonic
circRNA_00384|Chr01:128123246_128123439_+	CsTGY01G0001611.t1	intronic
circRNA_00385|Chr01:128594406_128594564_+		intergenic
circRNA_00386|Chr01:129768920_129769759_+	CsTGY01G0001623.t1	exonic
circRNA_00387|Chr01:129769669_129770558_+	CsTGY01G0001623.t1	exonic
circRNA_00388|Chr01:130017871_130018089_+	CsTGY01G0001625.t2	exonic
circRNA_00389|Chr01:130019656_130019913_+	CsTGY01G0001625.t2	exonic
circRNA_00390|Chr01:130019812_130020679_+	CsTGY01G0001625.t1	exonic
circRNA_00391|Chr01:130205108_130205348_+	CsTGY01G0001630.t1	exonic
circRNA_00392|Chr01:130208094_130208291_-	CsTGY01G0001631.t1	exonic
circRNA_00393|Chr01:131511588_131511848_-	CsTGY01G0001647.t1	exonic
circRNA_00394|Chr01:132752341_132752493_+	CsTGY01G0001660.t1	exonic
circRNA_00395|Chr01:133074096_133074250_+	CsTGY01G0001664.t1	intronic
circRNA_00396|Chr01:134240118_134252814_+	CsTGY01G0001677.t1	exonic
circRNA_00397|Chr01:134252361_134252814_+	CsTGY01G0001677.t1	exonic
circRNA_00398|Chr01:134252361_134255801_+	CsTGY01G0001677.t1	exonic
circRNA_00399|Chr01:134719698_134719881_-	CsTGY01G0001683.t1	exonic
circRNA_00400|Chr01:135033153_135033389_-	CsTGY01G0001688.t1	antisense
circRNA_00401|Chr01:135178389_135178548_-	CsTGY01G0001691.t1	exonic
circRNA_00402|Chr01:135237443_135237663_-	CsTGY01G0001692.t1	exonic
circRNA_00403|Chr01:136097174_136098351_+	CsTGY01G0001703.t1	exonic
circRNA_00404|Chr01:136509880_136510088_+	CsTGY01G0001709.t1	antisense
circRNA_00405|Chr01:136512063_136512432_-	CsTGY01G0001709.t1	exonic
circRNA_00406|Chr01:136610638_136612757_-	CsTGY01G0001710.t1	exonic
circRNA_00407|Chr01:136611230_136611404_+	CsTGY01G0001710.t1	antisense
circRNA_00408|Chr01:136769042_136769213_+	CsTGY01G0001714.t1	antisense
circRNA_00409|Chr01:136769063_136769318_-	CsTGY01G0001714.t1	exonic
circRNA_00410|Chr01:136774431_136774580_-	CsTGY01G0001714.t1	exonic
circRNA_00411|Chr01:136804474_136804593_+	CsTGY01G0001715.t1	exonic
circRNA_00412|Chr01:136810476_136810633_-	CsTGY01G0001716.t1	exonic
circRNA_00413|Chr01:136811847_136812043_-	CsTGY01G0001716.t1	exonic
circRNA_00414|Chr01:136902764_136903012_-	CsTGY01G0001718.t1	antisense
circRNA_00415|Chr01:137153260_137153620_-	CsTGY01G0001724.t1	exonic
circRNA_00416|Chr01:138886212_138887035_-	CsTGY01G0001738.t1	exonic
circRNA_00417|Chr01:138918479_138918699_-	CsTGY01G0001740.t1	exonic
circRNA_00418|Chr01:140223678_140224027_-	CsTGY01G0001751.t1	antisense
circRNA_00419|Chr01:140844301_140851101_+		intergenic
circRNA_00420|Chr01:140847197_140847337_+		intergenic
circRNA_00421|Chr01:140859518_140860789_+		intergenic
circRNA_00422|Chr01:140975338_140975522_+		intergenic
circRNA_00423|Chr01:140977709_140977862_-		intergenic
circRNA_00424|Chr01:141267898_141268034_+	CsTGY01G0001760.t1	exonic
circRNA_00425|Chr01:141825057_141825209_+	CsTGY01G0001768.t1	exonic
circRNA_00426|Chr01:142260955_142261113_-	CsTGY01G0001779.t1	exonic
circRNA_00427|Chr01:142781496_142781740_-	CsTGY01G0001789.t1	exonic
circRNA_00428|Chr01:143120881_143121112_-	CsTGY01G0001793.t1	exonic
circRNA_00429|Chr01:143120976_143121278_-	CsTGY01G0001793.t1	exonic
circRNA_00430|Chr01:143729660_143730007_-	CsTGY01G0001803.t1	exonic
circRNA_00431|Chr01:144164567_144164801_-	CsTGY01G0001810.t1	exonic
circRNA_00432|Chr01:144871674_144962822_+	CsTGY01G0001825.t1	antisense
circRNA_00433|Chr01:145180317_145182077_-	CsTGY01G0001828.t1	exonic
circRNA_00434|Chr01:145227894_145236209_-		intergenic
circRNA_00435|Chr01:145228067_145228264_-		intergenic
circRNA_00436|Chr01:145330057_145340019_-	CsTGY01G0001829.t2	exonic
circRNA_00437|Chr01:145393876_145396250_-	CsTGY01G0001830.t1	exonic
circRNA_00438|Chr01:145513513_145514100_+	CsTGY01G0001831.t1	exonic
circRNA_00439|Chr01:145849905_145850314_-		intergenic
circRNA_00440|Chr01:145898504_145899110_-	CsTGY01G0001838.t1	exonic
circRNA_00441|Chr01:145898504_145901642_-	CsTGY01G0001838.t1	exonic
circRNA_00442|Chr01:145898972_145899110_-	CsTGY01G0001838.t1	exonic
circRNA_00443|Chr01:145899812_145899998_+	CsTGY01G0001838.t1	antisense
circRNA_00444|Chr01:146115447_146115833_+	CsTGY01G0001841.t1	antisense
circRNA_00445|Chr01:146121420_146123512_-	CsTGY01G0001841.t1	exonic
circRNA_00446|Chr01:146121420_146133428_-	CsTGY01G0001841.t1	exonic
circRNA_00447|Chr01:146132397_146133428_-	CsTGY01G0001841.t1	exonic
circRNA_00448|Chr01:146145652_146145824_-	CsTGY01G0001841.t1	exonic
circRNA_00449|Chr01:146146980_146147250_-	CsTGY01G0001841.t1	exonic
circRNA_00450|Chr01:146254518_146254673_-	CsTGY01G0001843.t1	antisense
circRNA_00451|Chr01:146264271_146267459_+	CsTGY01G0001843.t1	exonic
circRNA_00452|Chr01:146267522_146267774_-	CsTGY01G0001843.t1	antisense
circRNA_00453|Chr01:146287058_146287287_-	CsTGY01G0001845.t1	exonic
circRNA_00454|Chr01:146588184_146589385_+	CsTGY01G0001849.t1	exonic
circRNA_00455|Chr01:146689967_146690430_+	CsTGY01G0001852.t1	exonic
circRNA_00456|Chr01:146689967_146708808_+	CsTGY01G0001852.t1	sense-overlapping
circRNA_00457|Chr01:147192894_147195924_-	CsTGY01G0001858.t1	sense-overlapping
circRNA_00458|Chr01:147300366_147300553_+	CsTGY01G0001862.t1	exonic
circRNA_00459|Chr01:148167017_148167944_-	CsTGY01G0001872.t1	exonic
circRNA_00460|Chr01:148500421_148501652_-	CsTGY01G0001882.t1	exonic
circRNA_00461|Chr01:149010350_149010504_+	CsTGY01G0001890.t1	intronic
circRNA_00462|Chr01:149130044_149130231_+	CsTGY01G0001892.t1	antisense
circRNA_00463|Chr01:149492527_149492810_+	CsTGY01G0001897.t1	exonic
circRNA_00464|Chr01:150512081_150539412_+	CsTGY01G0001906.t1	exonic
circRNA_00465|Chr01:150514477_150514692_+	CsTGY01G0001906.t2	intronic
circRNA_00466|Chr01:150559806_150566838_+	CsTGY01G0001907.t1	exonic
circRNA_00467|Chr01:150559806_150568766_+	CsTGY01G0001907.t1	exonic
circRNA_00468|Chr01:150588939_150589143_+		intergenic
circRNA_00469|Chr01:150754475_150758445_+	CsTGY01G0001912.t1	exonic
circRNA_00470|Chr01:150760249_150760572_-	CsTGY01G0001912.t1	antisense
circRNA_00471|Chr01:150765101_150765383_+	CsTGY01G0001912.t1	exonic
circRNA_00472|Chr01:151030374_151040125_+	CsTGY01G0001921.t1	exonic
circRNA_00473|Chr01:151036554_151037640_+	CsTGY01G0001921.t1	exonic
circRNA_00474|Chr01:151036554_151040125_+	CsTGY01G0001921.t1	exonic
circRNA_00475|Chr01:151053794_151053977_+	CsTGY01G0001921.t1	exonic
circRNA_00476|Chr01:151060441_151060653_-	CsTGY01G0001922.t1	exonic
circRNA_00477|Chr01:151062663_151063072_-	CsTGY01G0001922.t1	exonic
circRNA_00478|Chr01:151143008_151143164_-	CsTGY01G0001924.t1	intronic
circRNA_00479|Chr01:151337110_151346683_+	CsTGY01G0001927.t1	exonic
circRNA_00480|Chr01:151337110_151346704_+	CsTGY01G0001927.t1	exonic
circRNA_00481|Chr01:151339980_151346704_+	CsTGY01G0001927.t1	exonic
circRNA_00482|Chr01:151339980_151356512_+	CsTGY01G0001927.t1	exonic
circRNA_00483|Chr01:152220578_152220732_+	CsTGY01G0001940.t1	intronic
circRNA_00484|Chr01:152229279_152234299_+	CsTGY01G0001940.t1	exonic
circRNA_00485|Chr01:152734968_152735197_+	CsTGY01G0001944.t1	antisense
circRNA_00486|Chr01:152737585_152737744_-	CsTGY01G0001944.t1	intronic
circRNA_00487|Chr01:152739222_152739382_-	CsTGY01G0001944.t1	intronic
circRNA_00488|Chr01:152832678_152832848_-	CsTGY01G0001946.t1	exonic
circRNA_00489|Chr01:152832974_152833144_-	CsTGY01G0001946.t1	exonic
circRNA_00490|Chr01:158578678_158578951_+	CsTGY01G0001980.t1	intronic
circRNA_00491|Chr01:158722105_158722247_+	CsTGY01G0001983.t1	exonic
circRNA_00492|Chr01:158785172_158785383_-	CsTGY01G0001984.t1	exonic
circRNA_00493|Chr01:159847289_159850452_-	CsTGY01G0001997.t1	exonic
circRNA_00494|Chr01:160068493_160129772_+	CsTGY01G0002005.t1	sense-overlapping
circRNA_00495|Chr01:160070560_160131265_+	CsTGY01G0002005.t1	sense-overlapping
circRNA_00496|Chr01:160071952_160132977_+	CsTGY01G0002005.t1	sense-overlapping
circRNA_00497|Chr01:160075545_160137261_+	CsTGY01G0002005.t1	sense-overlapping
circRNA_00498|Chr01:160470242_160470416_-	CsTGY01G0002010.t1	intronic
circRNA_00499|Chr01:160471525_160472230_-	CsTGY01G0002010.t1	exonic
circRNA_00500|Chr01:162676251_162676575_+	CsTGY01G0002023.t1	exonic
circRNA_00501|Chr01:163558916_163559121_+	CsTGY01G0002033.t1	sense-overlapping
circRNA_00502|Chr01:165300570_165300943_+		intergenic
circRNA_00503|Chr01:165338269_165338430_+		intergenic
circRNA_00504|Chr01:166075570_166076791_+		intergenic
circRNA_00505|Chr01:166892472_166895853_-	CsTGY01G0002067.t1	exonic
circRNA_00506|Chr01:167406359_167406619_-	CsTGY01G0002074.t1	antisense
circRNA_00507|Chr01:167406365_167406570_-	CsTGY01G0002074.t1	antisense
circRNA_00508|Chr01:167483435_167483784_+	CsTGY01G0002077.t1	exonic
circRNA_00509|Chr01:167483844_167483999_+	CsTGY01G0002077.t1	exonic
circRNA_00510|Chr01:167487317_167488833_+	CsTGY01G0002077.t1	exonic
circRNA_00511|Chr01:170688308_170688999_-	CsTGY01G0002113.t1	exonic
circRNA_00512|Chr01:170712554_170719935_-		intergenic
circRNA_00513|Chr01:170891844_170892125_-	CsTGY01G0002119.t1	exonic
circRNA_00514|Chr01:170904894_170905057_-	CsTGY01G0002119.t1	exonic
circRNA_00515|Chr01:170983528_170983727_-	CsTGY01G0002121.t1	antisense
circRNA_00516|Chr01:171067499_171067697_+	CsTGY01G0002122.t1	exonic
circRNA_00517|Chr01:173061280_173061611_-	CsTGY01G0002146.t1	antisense
circRNA_00518|Chr01:173267463_173268762_-		intergenic
circRNA_00519|Chr01:173339021_173340496_+	CsTGY01G0002153.t1	exonic
circRNA_00520|Chr01:174534603_174539214_+	CsTGY01G0002167.t1	exonic
circRNA_00521|Chr01:175012302_175017666_+	CsTGY01G0002182.t1	exonic
circRNA_00522|Chr01:175034024_175034242_+	CsTGY01G0002183.t1	antisense
circRNA_00523|Chr01:175131546_175131674_-	CsTGY01G0002185.t1	exonic
circRNA_00524|Chr01:175581200_175581945_-	CsTGY01G0002192.t1	exonic
circRNA_00525|Chr01:175722045_175809403_-	CsTGY01G0002195.t1	sense-overlapping
circRNA_00526|Chr01:176114814_176115125_+	CsTGY01G0002198.t1	exonic
circRNA_00527|Chr01:176114814_176118261_+	CsTGY01G0002198.t1	exonic
circRNA_00528|Chr01:176168239_176168352_+	CsTGY01G0002200.t1	antisense
circRNA_00529|Chr01:176168297_176168413_+	CsTGY01G0002200.t1	antisense
circRNA_00530|Chr01:176536086_176536247_-	CsTGY01G0002204.t1	sense-overlapping
circRNA_00531|Chr01:176536220_176536397_+	CsTGY01G0002204.t1	antisense
circRNA_00532|Chr01:176537021_176537208_-	CsTGY01G0002204.t1	exonic
circRNA_00533|Chr01:177725427_177725877_+	CsTGY01G0002210.t1	exonic
circRNA_00534|Chr01:177725805_177727229_+	CsTGY01G0002210.t1	exonic
circRNA_00535|Chr01:177725805_177727783_+	CsTGY01G0002210.t1	exonic
circRNA_00536|Chr01:177947576_177947734_-		intergenic
circRNA_00537|Chr01:178419613_178419837_-	CsTGY01G0002217.t1	exonic
circRNA_00538|Chr01:179244111_179244353_+	CsTGY01G0002226.t1	exonic
circRNA_00539|Chr01:179244771_179245146_+	CsTGY01G0002226.t1	exonic
circRNA_00540|Chr01:179244895_179245202_+	CsTGY01G0002226.t1	exonic
circRNA_00541|Chr01:179245497_179245737_+	CsTGY01G0002226.t1	exonic
circRNA_00542|Chr01:179579988_179582788_-	CsTGY01G0002231.t1	exonic
circRNA_00543|Chr01:179583982_179591700_-	CsTGY01G0002231.t1	exonic
circRNA_00544|Chr01:179584369_179590636_-	CsTGY01G0002231.t1	exonic
circRNA_00545|Chr01:179590538_179591700_-	CsTGY01G0002231.t1	exonic
circRNA_00546|Chr01:179591350_179591700_-	CsTGY01G0002231.t1	exonic
circRNA_00547|Chr01:179755894_179764498_-	CsTGY01G0002239.t1	exonic
circRNA_00548|Chr01:179864507_179865021_+	CsTGY01G0002240.t1	exonic
circRNA_00549|Chr01:180274598_180274778_+	CsTGY01G0002245.t1	intronic
circRNA_00550|Chr01:180611156_180611450_-	CsTGY01G0002250.t1	exonic
circRNA_00551|Chr01:180796519_180805798_+	CsTGY01G0002251.t1	exonic
circRNA_00552|Chr01:180796519_180808348_+	CsTGY01G0002251.t1	exonic
circRNA_00553|Chr01:180796519_180814714_+	CsTGY01G0002251.t1	exonic
circRNA_00554|Chr01:180829243_180829414_-	CsTGY01G0002252.t1	intronic
circRNA_00555|Chr01:180880586_180892815_+		intergenic
circRNA_00556|Chr01:182699865_182703132_-	CsTGY01G0002267.t1	exonic
circRNA_00557|Chr01:183105556_183109450_-	CsTGY01G0002278.t1	exonic
circRNA_00558|Chr01:183158291_183158434_+	CsTGY01G0002281.t1	exonic
circRNA_00559|Chr01:183164676_183164898_+	CsTGY01G0002282.t1	antisense
circRNA_00560|Chr01:183206944_183207373_+	CsTGY01G0002284.t1	antisense
circRNA_00561|Chr01:183219506_183219768_-	CsTGY01G0002284.t1	exonic
circRNA_00562|Chr01:184475272_184475577_+	CsTGY01G0002293.t2	exonic
circRNA_00563|Chr01:184482989_184484851_+	CsTGY01G0002293.t1	exonic
circRNA_00564|Chr01:184585633_184601389_-	CsTGY01G0002296.t2	exonic
circRNA_00565|Chr01:184601324_184601970_-	CsTGY01G0002296.t1	exonic
circRNA_00566|Chr01:184757737_184769654_+	CsTGY01G0002302.t1	antisense
circRNA_00567|Chr01:184757740_184769654_+	CsTGY01G0002302.t1	antisense
circRNA_00568|Chr01:184894235_184894469_+	CsTGY01G0002307.t1	exonic
circRNA_00569|Chr01:184904165_184904743_+	CsTGY01G0002307.t1	exonic
circRNA_00570|Chr01:184920830_184945722_-	CsTGY01G0002309.t1	sense-overlapping
circRNA_00571|Chr01:184942425_184942582_+		intergenic
circRNA_00572|Chr01:184945568_184947817_-	CsTGY01G0002309.t1	exonic
circRNA_00573|Chr01:186149542_186149703_-	CsTGY01G0002327.t1	exonic
circRNA_00574|Chr01:186149758_186149919_-	CsTGY01G0002327.t1	exonic
circRNA_00575|Chr01:186158166_186164398_-	CsTGY01G0002327.t1	exonic
circRNA_00576|Chr01:186381480_186381764_-		intergenic
circRNA_00577|Chr01:186915575_186915754_+		intergenic
circRNA_00578|Chr01:187001641_187001731_+	CsTGY01G0002345.t1	exonic
circRNA_00579|Chr01:187216025_187233798_+	CsTGY01G0002349.t1	exonic
circRNA_00580|Chr01:187280048_187285442_+	CsTGY01G0002350.t1	exonic
circRNA_00581|Chr01:187293705_187294198_+	CsTGY01G0002351.t1	exonic
circRNA_00582|Chr01:187361419_187361568_+	CsTGY01G0002353.t1	antisense
circRNA_00583|Chr01:187524653_187539362_+	CsTGY01G0002360.t1	sense-overlapping
circRNA_00584|Chr01:187528951_187547832_+	CsTGY01G0002358.t1	sense-overlapping
circRNA_00585|Chr01:189588305_189635996_+	CsTGY01G0002375.t1	sense-overlapping
circRNA_00586|Chr01:190213625_190218639_+	CsTGY01G0002386.t1	exonic
circRNA_00587|Chr01:190307213_190307726_-		intergenic
circRNA_00588|Chr01:190307649_190307800_-		intergenic
circRNA_00589|Chr01:190307668_190308263_-		intergenic
circRNA_00590|Chr01:190412132_190412578_+	CsTGY01G0002389.t1	exonic
circRNA_00591|Chr01:190412662_190412910_+	CsTGY01G0002389.t1	exonic
circRNA_00592|Chr01:190412662_190413161_+	CsTGY01G0002389.t2	exonic
circRNA_00593|Chr01:190412662_190413321_+	CsTGY01G0002389.t2	exonic
circRNA_00594|Chr01:190413242_190413548_+	CsTGY01G0002389.t2	exonic
circRNA_00595|Chr01:190450459_190450658_+	CsTGY01G0002393.t1	antisense
circRNA_00596|Chr01:190522937_190532349_-	CsTGY01G0002397.t1	sense-overlapping
circRNA_00597|Chr01:190530379_190532349_-	CsTGY01G0002397.t1	exonic
circRNA_00598|Chr01:190530379_190537345_-	CsTGY01G0002397.t1	exonic
circRNA_00599|Chr01:190702819_190710884_+		intergenic
circRNA_00600|Chr01:191888466_191891075_+	CsTGY01G0002414.t1	exonic
circRNA_00601|Chr01:191897326_191921134_+	CsTGY01G0002414.t1	exonic
circRNA_00602|Chr01:191904129_191906289_+	CsTGY01G0002414.t1	exonic
circRNA_00603|Chr01:191904129_191906297_+	CsTGY01G0002414.t1	exonic
circRNA_00604|Chr01:191904129_191911024_+	CsTGY01G0002414.t1	exonic
circRNA_00605|Chr01:191904129_191916484_+	CsTGY01G0002414.t1	exonic
circRNA_00606|Chr01:191904129_191919410_+	CsTGY01G0002414.t1	exonic
circRNA_00607|Chr01:191904129_191921134_+	CsTGY01G0002414.t1	exonic
circRNA_00608|Chr01:191904129_191928501_+	CsTGY01G0002414.t1	exonic
circRNA_00609|Chr01:191904394_191911024_+	CsTGY01G0002414.t1	exonic
circRNA_00610|Chr01:191910716_191911024_+	CsTGY01G0002414.t1	exonic
circRNA_00611|Chr01:191910716_191911114_+	CsTGY01G0002414.t1	exonic
circRNA_00612|Chr01:191910716_191921134_+	CsTGY01G0002414.t1	exonic
circRNA_00613|Chr01:191910750_191911015_-	CsTGY01G0002414.t1	antisense
circRNA_00614|Chr01:191928426_191929120_+	CsTGY01G0002414.t1	exonic
circRNA_00615|Chr01:191945179_191945335_+	CsTGY01G0002416.t1	antisense
circRNA_00616|Chr01:192072784_192075806_-	CsTGY01G0002420.t1	exonic
circRNA_00617|Chr01:192074814_192074955_+	CsTGY01G0002420.t1	antisense
circRNA_00618|Chr01:192226222_192226391_+	CsTGY01G0002426.t1	exonic
circRNA_00619|Chr01:192328508_192329390_-	CsTGY01G0002428.t1	exonic
circRNA_00620|Chr01:192333699_192333876_-	CsTGY01G0002428.t1	exonic
circRNA_00621|Chr01:192497412_192498118_+	CsTGY01G0002430.t1	exonic
circRNA_00622|Chr01:192516629_192516785_+	CsTGY01G0002431.t1	antisense
circRNA_00623|Chr01:192723690_192723922_-	CsTGY01G0002437.t1	antisense
circRNA_00624|Chr01:192723787_192723997_+	CsTGY01G0002437.t1	exonic
circRNA_00625|Chr01:192727514_192727697_+	CsTGY01G0002437.t1	exonic
circRNA_00626|Chr01:192728848_192729203_+	CsTGY01G0002437.t1	exonic
circRNA_00627|Chr01:192754609_192754758_-	CsTGY01G0002439.t1	exonic
circRNA_00628|Chr01:192948524_192951538_+	CsTGY01G0002444.t1	exonic
circRNA_00629|Chr01:192976948_192977154_-	CsTGY01G0002447.t1	intronic
circRNA_00630|Chr01:192977570_192981373_-	CsTGY01G0002447.t1	exonic
circRNA_00631|Chr01:192980019_192981931_-	CsTGY01G0002447.t1	exonic
circRNA_00632|Chr01:193783351_193784213_+	CsTGY01G0002463.t1	antisense
circRNA_00633|Chr01:193788283_193788446_-	CsTGY01G0002463.t1	exonic
circRNA_00634|Chr01:193951343_193951493_+	CsTGY01G0002467.t1	sense-overlapping
circRNA_00635|Chr01:193962871_193963812_+		intergenic
circRNA_00636|Chr01:194666507_194666736_-	CsTGY01G0002485.t1	antisense
circRNA_00637|Chr01:194666737_194666889_-	CsTGY01G0002485.t1	antisense
circRNA_00638|Chr01:194666960_194667175_-	CsTGY01G0002485.t1	antisense
circRNA_00639|Chr01:195033895_195034146_+		intergenic
circRNA_00640|Chr01:195154980_195155219_+	CsTGY01G0002495.t1	antisense
circRNA_00641|Chr01:195243566_195243808_-	CsTGY01G0002496.t1	exonic
circRNA_00642|Chr01:197053446_197054193_+	CsTGY01G0002521.t1	exonic
circRNA_00643|Chr01:197058568_197085791_-	CsTGY01G0002522.t1	sense-overlapping
circRNA_00644|Chr01:197059146_197086160_-	CsTGY01G0002522.t1	sense-overlapping
circRNA_00645|Chr01:197070150_197070279_+	CsTGY01G0002522.t1	antisense
circRNA_00646|Chr01:197070910_197096636_-	CsTGY01G0002522.t1	sense-overlapping
circRNA_00647|Chr01:197071354_197096944_-	CsTGY01G0002522.t1	sense-overlapping
circRNA_00648|Chr01:197072664_197097475_-	CsTGY01G0002523.t1	sense-overlapping
circRNA_00649|Chr01:197072743_197098628_-	CsTGY01G0002522.t1	sense-overlapping
circRNA_00650|Chr01:197074421_197100223_-	CsTGY01G0002523.t1	sense-overlapping
circRNA_00651|Chr01:197074719_197100487_-	CsTGY01G0002523.t1	sense-overlapping
circRNA_00652|Chr01:197075698_197100777_-	CsTGY01G0002523.t1	sense-overlapping
circRNA_00653|Chr01:197078363_197107551_-	CsTGY01G0002523.t1	sense-overlapping
circRNA_00654|Chr01:197140112_197141835_-	CsTGY01G0002526.t1	exonic
circRNA_00655|Chr01:197140112_197142268_-	CsTGY01G0002526.t1	exonic
circRNA_00656|Chr01:197159004_197159115_+	CsTGY01G0002527.t1	exonic
circRNA_00657|Chr01:197250836_197250985_-	CsTGY01G0002531.t1	exonic
circRNA_00658|Chr01:197259324_197259542_-	CsTGY01G0002531.t1	exonic
circRNA_00659|Chr01:197358336_197358620_+	CsTGY01G0002535.t1	antisense
circRNA_00660|Chr01:197392517_197393853_+	CsTGY01G0002536.t1	exonic
circRNA_00661|Chr01:197401985_197403492_-	CsTGY01G0002537.t1	exonic
circRNA_00662|Chr01:197436831_197436996_-	CsTGY01G0002538.t1	exonic
circRNA_00663|Chr01:197517368_197517585_-	CsTGY01G0002540.t1	antisense
circRNA_00664|Chr01:197560154_197563062_-	CsTGY01G0002543.t1	exonic
circRNA_00665|Chr01:197704777_197705004_+	CsTGY01G0002547.t1	antisense
circRNA_00666|Chr01:198561825_198562044_+	CsTGY01G0002565.t1	exonic
circRNA_00667|Chr01:198562121_198571917_+	CsTGY01G0002565.t1	exonic
circRNA_00668|Chr01:198567921_198571917_+	CsTGY01G0002565.t1	exonic
circRNA_00669|Chr01:198852685_198852946_+	CsTGY01G0002573.t1	exonic
circRNA_00670|Chr01:199147448_199147653_-	CsTGY01G0002580.t1	sense-overlapping
circRNA_00671|Chr01:199193264_199195378_-	CsTGY01G0002582.t1	exonic
circRNA_00672|Chr01:199617473_199617651_-	CsTGY01G0002591.t1	antisense
circRNA_00673|Chr01:199618074_199618218_+	CsTGY01G0002591.t1	exonic
circRNA_00674|Chr01:199623153_199623321_+	CsTGY01G0002591.t1	intronic
circRNA_00675|Chr01:199896630_199896790_-	CsTGY01G0002594.t1	antisense
circRNA_00676|Chr01:199897847_199898108_+	CsTGY01G0002594.t1	exonic
circRNA_00677|Chr01:199901375_199901563_+	CsTGY01G0002595.t1	antisense
circRNA_00678|Chr01:200003493_200003899_+	CsTGY01G0002599.t1	exonic
circRNA_00679|Chr01:200003805_200006923_+	CsTGY01G0002599.t1	exonic
circRNA_00680|Chr01:200010786_200011025_+	CsTGY01G0002599.t1	exonic
circRNA_00681|Chr01:200017740_200021728_-	CsTGY01G0002600.t1	exonic
circRNA_00682|Chr01:200063799_200065314_+	CsTGY01G0002602.t1	antisense
circRNA_00683|Chr01:200065864_200066074_-	CsTGY01G0002602.t1	exonic
circRNA_00684|Chr01:200322465_200323064_-	CsTGY01G0002615.t1	exonic
circRNA_00685|Chr01:200357247_200358066_-	CsTGY01G0002616.t1	exonic
circRNA_00686|Chr01:200404774_200426088_-	CsTGY01G0002617.t1	sense-overlapping
circRNA_00687|Chr01:200426205_200426325_+	CsTGY01G0002617.t1	antisense
circRNA_00688|Chr01:200550426_200550767_+	CsTGY01G0002618.t1	exonic
circRNA_00689|Chr01:201146591_201146968_-	CsTGY01G0002627.t1	exonic
circRNA_00690|Chr01:201549700_201550288_-	CsTGY01G0002633.t1	exonic
circRNA_00691|Chr01:201549758_201550219_-	CsTGY01G0002633.t1	exonic
circRNA_00692|Chr01:201805871_201808417_+	CsTGY01G0002641.t1	exonic
circRNA_00693|Chr01:202512420_202512562_+	CsTGY01G0002659.t1	exonic
circRNA_00694|Chr01:202515437_202515654_-	CsTGY01G0002660.t1	exonic
circRNA_00695|Chr01:202592029_202592797_-	CsTGY01G0002661.t1	antisense
circRNA_00696|Chr01:202592632_202592826_+	CsTGY01G0002661.t1	exonic
circRNA_00697|Chr01:202592787_202592963_-	CsTGY01G0002661.t1	antisense
circRNA_00698|Chr01:203121637_203121796_+	CsTGY01G0002671.t1	exonic
circRNA_00699|Chr01:203151023_203151225_+		intergenic
circRNA_00700|Chr01:203690158_203693488_-	CsTGY01G0002678.t1	exonic
circRNA_00701|Chr01:203700466_203700639_-	CsTGY01G0002678.t1	exonic
circRNA_00702|Chr01:204194985_204204530_-	CsTGY01G0002687.t1	exonic
circRNA_00703|Chr01:204250909_204251067_+		intergenic
circRNA_00704|Chr01:204372386_204372602_+	CsTGY01G0002693.t1	exonic
circRNA_00705|Chr01:204720375_204721409_-	CsTGY01G0002701.t1	exonic
circRNA_00706|Chr01:205089428_205095405_-	CsTGY01G0002707.t1	sense-overlapping
circRNA_00707|Chr01:205305508_205305705_-	CsTGY01G0002710.t1	exonic
circRNA_00708|Chr01:205305532_205305705_-	CsTGY01G0002710.t1	exonic
circRNA_00709|Chr01:205308093_205309695_-	CsTGY01G0002710.t1	exonic
circRNA_00710|Chr01:205444945_205445133_-	CsTGY01G0002715.t1	exonic
circRNA_00711|Chr01:205447076_205447285_-	CsTGY01G0002715.t1	exonic
circRNA_00712|Chr01:205447283_205447410_-	CsTGY01G0002715.t1	exonic
circRNA_00713|Chr01:205447314_205447580_-	CsTGY01G0002715.t1	exonic
circRNA_00714|Chr01:205447462_205447657_+	CsTGY01G0002715.t1	antisense
circRNA_00715|Chr01:205447697_205448034_+	CsTGY01G0002715.t1	antisense
circRNA_00716|Chr01:205529014_205530078_-	CsTGY01G0002718.t1	exonic
circRNA_00717|Chr01:205534550_205535643_-	CsTGY01G0002718.t1	exonic
circRNA_00718|Chr01:205633966_205634268_+	CsTGY01G0002722.t1	antisense
circRNA_00719|Chr01:205650960_205651110_-		intergenic
circRNA_00720|Chr01:205723922_205724072_-	CsTGY01G0002727.t1	exonic
circRNA_00721|Chr01:206174087_206176351_+	CsTGY01G0002734.t1	exonic
circRNA_00722|Chr01:206176287_206176991_+	CsTGY01G0002734.t1	exonic
circRNA_00723|Chr01:206320821_206323658_+	CsTGY01G0002739.t1	exonic
circRNA_00724|Chr01:206454558_206456289_-	CsTGY01G0002746.t1	exonic
circRNA_00725|Chr01:206483051_206483244_-	CsTGY01G0002747.t1	exonic
circRNA_00726|Chr01:206610390_206619756_+	CsTGY01G0002752.t1	exonic
circRNA_00727|Chr01:206739557_206746609_-		intergenic
circRNA_00728|Chr01:206813619_206813848_-	CsTGY01G0002763.t1	antisense
circRNA_00729|Chr01:207181879_207182051_-		intergenic
circRNA_00730|Chr01:207181885_207182035_+		intergenic
circRNA_00731|Chr01:207224263_207224968_-	CsTGY01G0002775.t1	exonic
circRNA_00732|Chr01:207741994_207743982_-	CsTGY01G0002779.t1	exonic
circRNA_00733|Chr01:207938897_207939145_+		intergenic
circRNA_00734|Chr01:208828835_208831586_+	CsTGY01G0002793.t1	exonic
circRNA_00735|Chr01:208829684_208831586_+	CsTGY01G0002793.t1	exonic
circRNA_00736|Chr01:208832901_208833013_+	CsTGY01G0002793.t1	exonic
circRNA_00737|Chr01:209069132_209070731_+	CsTGY01G0002801.t1	exonic
circRNA_00738|Chr01:209101633_209101910_+	CsTGY01G0002803.t1	exonic
circRNA_00739|Chr01:209101633_209103789_+	CsTGY01G0002803.t1	exonic
circRNA_00740|Chr01:209105491_209105750_+	CsTGY01G0002803.t1	exonic
circRNA_00741|Chr01:209115637_209117567_+	CsTGY01G0002804.t1	exonic
circRNA_00742|Chr01:209115974_209117125_+	CsTGY01G0002804.t1	exonic
circRNA_00743|Chr01:209117029_209117567_+	CsTGY01G0002804.t1	exonic
circRNA_00744|Chr01:209118116_209118272_+	CsTGY01G0002804.t1	exonic
circRNA_00745|Chr01:209122092_209122269_+	CsTGY01G0002804.t1	exonic
circRNA_00746|Chr01:209122180_209122326_+	CsTGY01G0002804.t1	exonic
circRNA_00747|Chr01:209784808_209789326_+	CsTGY01G0002817.t1	exonic
circRNA_00748|Chr01:209885586_209890758_+	CsTGY01G0002819.t2	exonic
circRNA_00749|Chr01:210953560_210953877_-	CsTGY01G0002831.t1	antisense
circRNA_00750|Chr01:210953911_210954131_-	CsTGY01G0002831.t1	antisense
circRNA_00751|Chr01:211260083_211260257_+	CsTGY01G0002838.t1	intronic
circRNA_00752|Chr01:211366007_211366180_-	CsTGY01G0002839.t1	antisense
circRNA_00753|Chr01:211366752_211366925_+	CsTGY01G0002839.t1	exonic
circRNA_00754|Chr01:211371228_211371406_+		intergenic
circRNA_00755|Chr01:211414739_211417056_-	CsTGY01G0002841.t1	exonic
circRNA_00756|Chr01:211417610_211417834_-	CsTGY01G0002841.t1	exonic
circRNA_00757|Chr01:211509310_211509563_+	CsTGY01G0002844.t1	exonic
circRNA_00758|Chr01:211524679_211526583_+	CsTGY01G0002845.t1	exonic
circRNA_00759|Chr01:212329820_212330541_-	CsTGY01G0002856.t1	exonic
circRNA_00760|Chr01:213481181_213481877_+	CsTGY01G0002881.t2	antisense
circRNA_00761|Chr01:213507702_213527446_+	CsTGY01G0002883.t1	antisense
circRNA_00762|Chr01:213513114_213531558_+	CsTGY01G0002883.t1	antisense
circRNA_00763|Chr01:213537161_213537381_-	CsTGY01G0002884.t1	exonic
circRNA_00764|Chr01:213598110_213675026_-	CsTGY01G0002888.t1	sense-overlapping
circRNA_00765|Chr01:213803994_213805276_-	CsTGY01G0002892.t1	exonic
circRNA_00766|Chr01:216257016_216258722_-	CsTGY01G0002911.t1	exonic
circRNA_00767|Chr01:216465055_216529290_-	CsTGY01G0002913.t1	sense-overlapping
circRNA_00768|Chr01:216466071_216529290_-	CsTGY01G0002913.t1	sense-overlapping
circRNA_00769|Chr01:217567236_217567444_+	CsTGY01G0002925.t1	antisense
circRNA_00770|Chr01:217617869_217618048_+	CsTGY01G0002926.t1	exonic
circRNA_00771|Chr01:217966356_217967080_+	CsTGY01G0002934.t1	exonic
circRNA_00772|Chr01:218005095_218006584_+	CsTGY01G0002936.t1	exonic
circRNA_00773|Chr01:218011185_218012038_+	CsTGY01G0002936.t1	exonic
circRNA_00774|Chr01:218071434_218071593_-	CsTGY01G0002937.t1	antisense
circRNA_00775|Chr01:218074013_218074357_-	CsTGY01G0002937.t1	antisense
circRNA_00776|Chr01:218075795_218076069_+		intergenic
circRNA_00777|Chr01:218120131_218120293_+	CsTGY01G0002939.t1	antisense
circRNA_00778|Chr01:218158157_218158332_-	CsTGY01G0002940.t1	exonic
circRNA_00779|Chr01:218620818_218634742_-	CsTGY01G0002948.t1	exonic
circRNA_00780|Chr01:218631757_218631909_-	CsTGY01G0002948.t1	intronic
circRNA_00781|Chr01:218634592_218638274_-	CsTGY01G0002948.t1	exonic
circRNA_00782|Chr01:218637663_218638274_-	CsTGY01G0002948.t1	exonic
circRNA_00783|Chr01:219108913_219119746_-	CsTGY01G0002956.t1	antisense
circRNA_00784|Chr01:219174226_219179608_+	CsTGY01G0002961.t1	exonic
circRNA_00785|Chr01:219183017_219185964_+	CsTGY01G0002961.t1	exonic
circRNA_00786|Chr01:219595807_219596007_-	CsTGY01G0002969.t1	antisense
circRNA_00787|Chr01:220484535_220484723_-	CsTGY01G0002990.t2	antisense
circRNA_00788|Chr01:220500646_220500825_+	CsTGY01G0002991.t1	sense-overlapping
circRNA_00789|Chr01:220500907_220501086_+	CsTGY01G0002991.t1	exonic
circRNA_00790|Chr01:220772157_220772515_+	CsTGY01G0002994.t1	exonic
circRNA_00791|Chr01:220781252_220781446_-	CsTGY01G0002995.t1	exonic
circRNA_00792|Chr01:220870223_220870411_-	CsTGY01G0002998.t1	antisense
circRNA_00793|Chr01:220870371_220873735_+	CsTGY01G0002998.t1	exonic
circRNA_00794|Chr01:221878378_221878747_-	CsTGY01G0003024.t1	exonic
circRNA_00795|Chr01:221878594_221878741_-	CsTGY01G0003024.t2	exonic
circRNA_00796|Chr01:221881773_221882085_-	CsTGY01G0003024.t1	exonic
circRNA_00797|Chr01:222591693_222591931_-	CsTGY01G0003044.t2	exonic
circRNA_00798|Chr01:222987918_222988144_-	CsTGY01G0003049.t1	exonic
circRNA_00799|Chr01:222998742_222998882_-	CsTGY01G0003049.t1	exonic
circRNA_00800|Chr01:223005154_223005574_-	CsTGY01G0003049.t1	exonic
circRNA_00801|Chr01:223005361_223005516_+	CsTGY01G0003049.t1	antisense
circRNA_00802|Chr01:223007185_223007481_-	CsTGY01G0003049.t1	intronic
circRNA_00803|Chr01:223091479_223091688_-	CsTGY01G0003054.t1	exonic
circRNA_00804|Chr01:223188644_223189207_+	CsTGY01G0003056.t1	exonic
circRNA_00805|Chr01:223316664_223316822_+	CsTGY01G0003057.t1	exonic
circRNA_00806|Chr01:223316806_223316957_+	CsTGY01G0003057.t1	exonic
circRNA_00807|Chr01:223375758_223378600_+	CsTGY01G0003059.t1	exonic
circRNA_00808|Chr01:223380381_223380601_+	CsTGY01G0003059.t1	intronic
circRNA_00809|Chr01:223619931_223620118_+		intergenic
circRNA_00810|Chr01:223632573_223632773_+	CsTGY01G0003064.t1	exonic
circRNA_00811|Chr01:223634083_223634249_-	CsTGY01G0003064.t1	antisense
circRNA_00812|Chr01:223634203_223634359_+	CsTGY01G0003064.t1	exonic
circRNA_00813|Chr01:223634314_223634640_+	CsTGY01G0003064.t1	exonic
circRNA_00814|Chr01:223634321_223634488_+	CsTGY01G0003064.t1	exonic
circRNA_00815|Chr01:223634360_223634488_+	CsTGY01G0003064.t1	exonic
circRNA_00816|Chr01:223634549_223634741_+	CsTGY01G0003064.t1	exonic
circRNA_00817|Chr01:223634566_223634721_+	CsTGY01G0003064.t1	exonic
circRNA_00818|Chr01:223634594_223634750_+	CsTGY01G0003064.t1	exonic
circRNA_00819|Chr01:223634636_223634822_+	CsTGY01G0003064.t1	exonic
circRNA_00820|Chr01:223849836_223850009_-	CsTGY01G0003071.t1	antisense
circRNA_00821|Chr01:223852359_223852606_+	CsTGY01G0003071.t1	exonic
circRNA_00822|Chr01:223904000_223904730_-	CsTGY01G0003073.t1	exonic
circRNA_00823|Chr01:224239877_224239988_+	CsTGY01G0003080.t1	exonic
circRNA_00824|Chr01:224242762_224243629_-	CsTGY01G0003080.t1	antisense
circRNA_00825|Chr01:225292869_225293069_-	CsTGY01G0003101.t1	antisense
circRNA_00826|Chr01:225503240_225503517_+	CsTGY01G0003103.t1	exonic
circRNA_00827|Chr01:225503263_225503417_+	CsTGY01G0003103.t1	exonic
circRNA_00828|Chr01:225503704_225503977_-	CsTGY01G0003103.t1	antisense
circRNA_00829|Chr01:225503885_225504049_-	CsTGY01G0003103.t1	antisense
circRNA_00830|Chr01:225503888_225504083_+	CsTGY01G0003103.t1	exonic
circRNA_00831|Chr01:225504099_225504274_-	CsTGY01G0003103.t1	antisense
circRNA_00832|Chr01:225612308_225612583_+	CsTGY01G0003107.t1	exonic
circRNA_00833|Chr01:225615487_225616228_+		intergenic
circRNA_00834|Chr01:225693373_225693551_+	CsTGY01G0003109.t1	exonic
circRNA_00835|Chr01:226316907_226317071_+	CsTGY01G0003124.t1	antisense
circRNA_00836|Chr01:226316907_226317149_+	CsTGY01G0003124.t1	antisense
circRNA_00837|Chr01:226316928_226317092_+	CsTGY01G0003124.t1	antisense
circRNA_00838|Chr01:226316928_226317149_+	CsTGY01G0003124.t1	antisense
circRNA_00839|Chr01:226316940_226317086_-	CsTGY01G0003124.t1	exonic
circRNA_00840|Chr01:226316955_226317092_+	CsTGY01G0003124.t1	antisense
circRNA_00841|Chr01:226316955_226317149_+	CsTGY01G0003124.t1	antisense
circRNA_00842|Chr01:226316955_226341549_+	CsTGY01G0003125.t1	antisense
circRNA_00843|Chr01:226316967_226317095_+	CsTGY01G0003124.t1	antisense
circRNA_00844|Chr01:226316973_226317095_+	CsTGY01G0003124.t1	antisense
circRNA_00845|Chr01:226316985_226317149_+	CsTGY01G0003124.t1	antisense
circRNA_00846|Chr01:226341262_226341426_+	CsTGY01G0003125.t1	antisense
circRNA_00847|Chr01:226341262_226341471_+	CsTGY01G0003125.t1	antisense
circRNA_00848|Chr01:226341262_226341549_+	CsTGY01G0003125.t1	antisense
circRNA_00849|Chr01:226341268_226341420_+	CsTGY01G0003125.t1	antisense
circRNA_00850|Chr01:226341268_226341426_+	CsTGY01G0003125.t1	antisense
circRNA_00851|Chr01:226341283_226341492_+	CsTGY01G0003125.t1	antisense
circRNA_00852|Chr01:226341310_226341420_+	CsTGY01G0003125.t1	antisense
circRNA_00853|Chr01:226341322_226341513_+	CsTGY01G0003125.t1	antisense
circRNA_00854|Chr01:226341325_226341477_-	CsTGY01G0003125.t1	exonic
circRNA_00855|Chr01:226341325_226341486_-	CsTGY01G0003125.t1	exonic
circRNA_00856|Chr01:226341328_226341492_+	CsTGY01G0003125.t1	antisense
circRNA_00857|Chr01:226341328_226341495_+	CsTGY01G0003125.t1	antisense
circRNA_00858|Chr01:226341340_226341492_+	CsTGY01G0003125.t1	antisense
circRNA_00859|Chr01:226341340_226341495_+	CsTGY01G0003125.t1	antisense
circRNA_00860|Chr01:226341363_226341495_+	CsTGY01G0003125.t1	antisense
circRNA_00861|Chr01:226547859_226548025_-	CsTGY01G0003131.t2	exonic
circRNA_00862|Chr01:227647586_227650986_-		intergenic
circRNA_00863|Chr01:227649000_227649328_-		intergenic
circRNA_00864|Chr01:227774793_227774997_-	CsTGY01G0003154.t1	antisense
circRNA_00865|Chr01:227775159_227775345_+	CsTGY01G0003154.t1	intronic
circRNA_00866|Chr01:228046954_228047163_+	CsTGY01G0003163.t1	antisense
circRNA_00867|Chr01:228494076_228494469_+	CsTGY01G0003175.t1	antisense
circRNA_00868|Chr01:229043075_229043407_-	CsTGY01G0003182.t1	exonic
circRNA_00869|Chr01:229047669_229047804_+	CsTGY01G0003182.t1	antisense
circRNA_00870|Chr01:229051932_229056228_-	CsTGY01G0003182.t1	exonic
circRNA_00871|Chr01:229051937_229052655_+	CsTGY01G0003182.t1	antisense
circRNA_00872|Chr01:229056125_229059822_-	CsTGY01G0003182.t1	exonic
circRNA_00873|Chr01:229056125_229065066_-	CsTGY01G0003182.t1	exonic
circRNA_00874|Chr01:229064998_229074100_-	CsTGY01G0003182.t1	exonic
circRNA_00875|Chr01:229081104_229081253_-	CsTGY01G0003182.t1	intronic
circRNA_00876|Chr01:229155659_229157076_+	CsTGY01G0003183.t1	exonic
circRNA_00877|Chr01:229155921_229157076_+	CsTGY01G0003183.t1	exonic
circRNA_00878|Chr01:229226437_229226887_+	CsTGY01G0003186.t1	exonic
circRNA_00879|Chr01:229226437_229228718_+	CsTGY01G0003186.t1	exonic
circRNA_00880|Chr01:229229443_229229644_+	CsTGY01G0003186.t1	exonic
circRNA_00881|Chr01:229233464_229233658_+	CsTGY01G0003186.t1	exonic
circRNA_00882|Chr01:229606729_229606907_+	CsTGY01G0003198.t1	intronic
circRNA_00883|Chr01:229668842_229670379_-	CsTGY01G0003203.t1	exonic
circRNA_00884|Chr01:229738055_229738272_-		intergenic
circRNA_00885|Chr01:230130656_230130861_-	CsTGY01G0003220.t1	exonic
circRNA_00886|Chr01:230132557_230132743_+	CsTGY01G0003220.t1	antisense
circRNA_00887|Chr01:230392518_230392684_-	CsTGY01G0003222.t1	exonic
circRNA_00888|Chr01:230430148_230430381_+	CsTGY01G0003223.t1	intronic
circRNA_00889|Chr01:230592004_230592517_-	CsTGY01G0003228.t1	antisense
circRNA_00890|Chr01:231017175_231106302_+	CsTGY01G0003239.t1	antisense
circRNA_00891|Chr01:231206464_231206661_-	CsTGY01G0003241.t1	antisense
circRNA_00892|Chr01:232466910_232467182_-	CsTGY01G0003273.t1	antisense
circRNA_00893|Chr01:236923415_236923587_+	CsTGY01G0003318.t1	exonic
circRNA_00894|Chr01:236923461_236923662_-	CsTGY01G0003318.t1	antisense
circRNA_00895|Chr01:237060119_237060358_+	CsTGY01G0003321.t1	exonic
circRNA_00896|Chr01:237463473_237464300_+	CsTGY01G0003336.t1	exonic
circRNA_00897|Chr01:237463571_237463722_+	CsTGY01G0003336.t1	exonic
circRNA_00898|Chr01:237463639_237463794_+	CsTGY01G0003336.t1	exonic
circRNA_00899|Chr01:237464383_237464704_+	CsTGY01G0003336.t1	exonic
circRNA_00900|Chr01:237480031_237480182_+	CsTGY01G0003337.t1	antisense
circRNA_00901|Chr01:237629921_237630108_+	CsTGY01G0003339.t2	exonic
circRNA_00902|Chr01:237630766_237630918_+	CsTGY01G0003339.t1	exonic
circRNA_00903|Chr01:237718344_237718562_+	CsTGY01G0003345.t1	exonic
circRNA_00904|Chr01:237718357_237719366_+	CsTGY01G0003345.t1	exonic
circRNA_00905|Chr01:237719831_237723029_+	CsTGY01G0003345.t1	exonic
circRNA_00906|Chr01:237721816_237722297_+	CsTGY01G0003345.t1	exonic
circRNA_00907|Chr01:237722139_237722504_+	CsTGY01G0003345.t1	exonic
circRNA_00908|Chr01:237722272_237722622_+	CsTGY01G0003345.t1	exonic
circRNA_00909|Chr01:237722355_237722606_+	CsTGY01G0003345.t1	exonic
circRNA_00910|Chr01:237722514_237722774_+	CsTGY01G0003345.t1	exonic
circRNA_00911|Chr01:237722518_237722735_+	CsTGY01G0003345.t1	exonic
circRNA_00912|Chr01:237722563_237722744_+	CsTGY01G0003345.t1	exonic
circRNA_00913|Chr01:237722623_237723707_+	CsTGY01G0003345.t1	exonic
circRNA_00914|Chr01:237722776_237723692_+	CsTGY01G0003345.t1	exonic
circRNA_00915|Chr01:237723577_237723843_-	CsTGY01G0003345.t1	antisense
circRNA_00916|Chr01:238831724_238833173_+	CsTGY01G0003371.t1	exonic
circRNA_00917|Chr01:238861138_238861590_+	CsTGY01G0003373.t1	exonic
circRNA_00918|Chr01:238923999_238924160_+		intergenic
circRNA_00919|Chr01:238947713_238952756_+	CsTGY01G0003378.t1	sense-overlapping
circRNA_00920|Chr01:239228925_239229421_-	CsTGY01G0003386.t1	exonic
circRNA_00921|Chr01:239281284_239281475_+	CsTGY01G0003388.t2	intronic
circRNA_00922|Chr01:239429765_239429926_-	CsTGY01G0003392.t1	exonic
circRNA_00923|Chr01:239586141_239586337_-	CsTGY01G0003398.t1	antisense
circRNA_00924|Chr01:239586415_239586579_+	CsTGY01G0003398.t1	exonic
circRNA_00925|Chr01:240030532_240030697_+		intergenic
circRNA_00926|Chr01:240030926_240031127_-		intergenic
circRNA_00927|Chr01:240672079_240672675_-	CsTGY01G0003418.t1	exonic
circRNA_00928|Chr01:240672079_240673131_-	CsTGY01G0003418.t1	exonic
circRNA_00929|Chr01:240672180_240672404_+	CsTGY01G0003418.t1	antisense
circRNA_00930|Chr01:240741705_240741839_+	CsTGY01G0003421.t1	exonic
circRNA_00931|Chr01:241856933_241858500_+	CsTGY01G0003445.t1	antisense
circRNA_00932|Chr01:241859096_241859399_-	CsTGY01G0003445.t1	exonic
circRNA_00933|Chr01:241869594_241869750_-	CsTGY01G0003445.t1	exonic
circRNA_00934|Chr01:241869594_241869785_-	CsTGY01G0003445.t1	exonic
circRNA_00935|Chr01:241869888_241870051_-	CsTGY01G0003445.t1	exonic
circRNA_00936|Chr01:241873019_241873182_-	CsTGY01G0003445.t1	exonic
circRNA_00937|Chr01:241883336_241884934_-	CsTGY01G0003445.t1	exonic
circRNA_00938|Chr01:241978344_241978586_-	CsTGY01G0003449.t2	exonic
circRNA_00939|Chr01:242566474_242569684_-	CsTGY01G0003460.t1	exonic
circRNA_00940|Chr01:242831814_242854472_-	CsTGY01G0003466.t2	sense-overlapping
circRNA_00941|Chr01:242882453_242882641_-	CsTGY01G0003466.t1	intronic
circRNA_00942|Chr01:242884452_242884781_-	CsTGY01G0003466.t2	exonic
circRNA_00943|Chr01:244145911_244146171_+	CsTGY01G0003495.t1	exonic
circRNA_00944|Chr01:244146703_244147290_+	CsTGY01G0003495.t1	exonic
circRNA_00945|Chr01:244207424_244207861_+	CsTGY01G0003497.t3	exonic
circRNA_00946|Chr01:244207514_244207848_+	CsTGY01G0003497.t3	exonic
circRNA_00947|Chr01:244207707_244208370_+	CsTGY01G0003497.t1	exonic
circRNA_00948|Chr01:244207707_244208755_+	CsTGY01G0003497.t1	exonic
circRNA_00949|Chr01:244209804_244210032_-	CsTGY01G0003497.t2	antisense
circRNA_00950|Chr01:244211843_244212016_+	CsTGY01G0003497.t2	exonic
circRNA_00951|Chr01:244213086_244213207_+	CsTGY01G0003497.t3	exonic
circRNA_00952|Chr01:244374454_244374720_-	CsTGY01G0003504.t1	antisense
circRNA_00953|Chr01:244380183_244380329_+	CsTGY01G0003505.t1	antisense
circRNA_00954|Chr01:244683499_244683983_+	CsTGY01G0003513.t1	exonic
circRNA_00955|Chr01:244723438_244723619_+	CsTGY01G0003516.t1	antisense
circRNA_00956|Chr01:244726648_244726858_-	CsTGY01G0003516.t1	exonic
circRNA_00957|Chr01:244735502_244735840_-	CsTGY01G0003516.t1	exonic
circRNA_00958|Chr01:244888399_244893375_-	CsTGY01G0003522.t1	exonic
circRNA_00959|Chr01:244888452_244888837_-	CsTGY01G0003522.t1	exonic
circRNA_00960|Chr01:244892250_244892592_-	CsTGY01G0003522.t1	exonic
circRNA_00961|Chr01:245004161_245004315_+	CsTGY01G0003525.t1	exonic
circRNA_00962|Chr01:245004288_245004438_+	CsTGY01G0003525.t1	exonic
circRNA_00963|Chr01:245085521_245107594_-	CsTGY01G0003527.t1	sense-overlapping
circRNA_00964|Chr01:245326024_245326785_-		intergenic
circRNA_00965|Chr01:245570570_245571683_-	CsTGY01G0003541.t1	exonic
circRNA_00966|Chr01:245724421_245724585_+	CsTGY01G0003544.t1	exonic
circRNA_00967|Chr01:245724437_245724706_+	CsTGY01G0003544.t1	exonic
circRNA_00968|Chr01:245724854_245725020_+	CsTGY01G0003544.t1	exonic
circRNA_00969|Chr01:245831381_245831604_-	CsTGY01G0003546.t1	intronic
circRNA_00970|Chr01:245831654_245831968_-	CsTGY01G0003546.t2	exonic
circRNA_00971|Chr01:245904031_245904211_-	CsTGY01G0003550.t1	exonic
circRNA_00972|Chr01:245905563_245905931_+	CsTGY01G0003550.t1	antisense
circRNA_00973|Chr01:245967283_245967840_+	CsTGY01G0003551.t1	exonic
circRNA_00974|Chr01:246347326_246347816_-	CsTGY01G0003562.t1	exonic
circRNA_00975|Chr01:246347326_246349384_-	CsTGY01G0003562.t1	exonic
circRNA_00976|Chr01:246409623_246413177_+	CsTGY01G0003563.t2	exonic
circRNA_00977|Chr01:246413255_246413530_+	CsTGY01G0003563.t2	exonic
circRNA_00978|Chr01:247211732_247211928_+	CsTGY01G0003572.t1	exonic
circRNA_00979|Chr01:247214719_247215108_+	CsTGY01G0003572.t1	exonic
circRNA_00980|Chr01:247334870_247335004_-	CsTGY01G0003577.t2	exonic
circRNA_00981|Chr01:247401925_247402179_+	CsTGY01G0003582.t1	antisense
circRNA_00982|Chr01:247637767_247637982_+		intergenic
circRNA_00983|Chr01:247642793_247644632_-	CsTGY01G0003591.t1	exonic
circRNA_00984|Chr01:247646331_247647583_-	CsTGY01G0003591.t1	exonic
circRNA_00985|Chr01:247657986_247658284_-	CsTGY01G0003591.t1	exonic
circRNA_00986|Chr01:249267597_249267748_-	CsTGY01G0003609.t1	antisense
circRNA_00987|Chr01:249284302_249284898_+	CsTGY01G0003610.t1	exonic
circRNA_00988|Chr01:249302643_249302813_+	CsTGY01G0003613.t1	exonic
circRNA_00989|Chr01:249308249_249308570_-	CsTGY01G0003614.t1	antisense
circRNA_00990|Chr01:249351898_249352051_-	CsTGY01G0003617.t1	antisense
circRNA_00991|Chr01:249351905_249352129_-	CsTGY01G0003617.t1	antisense
circRNA_00992|Chr01:249448347_249448515_-	CsTGY01G0003620.t1	exonic
circRNA_00993|Chr01:250375075_250375372_+	CsTGY01G0003643.t1	exonic
circRNA_00994|Chr01:250376942_250377153_+	CsTGY01G0003643.t1	sense-overlapping
circRNA_00995|Chr01:250630320_250630529_-	CsTGY01G0003650.t1	exonic
circRNA_00996|Chr01:250694080_250694229_-	CsTGY01G0003654.t1	exonic
circRNA_00997|Chr01:250960099_250960254_+	CsTGY01G0003663.t1	intronic
circRNA_00998|Chr01:251111922_251112095_-		intergenic
circRNA_00999|Chr01:251770472_251770790_+	CsTGY01G0003697.t1	exonic
circRNA_01000|Chr01:251823217_251823414_+	CsTGY01G0003701.t1	exonic
circRNA_01001|Chr01:251824649_251824991_+	CsTGY01G0003701.t1	exonic
circRNA_01002|Chr01:251859163_251861069_-	CsTGY01G0003703.t1	exonic
circRNA_01003|Chr01:252520228_252520478_+	CsTGY01G0003727.t1	antisense
circRNA_01004|Chr01:252525234_252525574_-	CsTGY01G0003729.t1	exonic
circRNA_01005|Chr01:252526330_252528510_-	CsTGY01G0003729.t1	exonic
circRNA_01006|Chr01:252528379_252530067_-	CsTGY01G0003729.t1	exonic
circRNA_01007|Chr01:252528926_252529004_-	CsTGY01G0003729.t1	exonic
circRNA_01008|Chr01:253062496_253062690_+	CsTGY01G0003751.t1	exonic
circRNA_01009|Chr01:253882152_253898914_+	CsTGY01G0003765.t1	antisense
circRNA_01010|Chr01:254052013_254052200_-	CsTGY01G0003773.t1	exonic
circRNA_01011|Chr01:254052013_254052618_-	CsTGY01G0003773.t1	exonic
circRNA_01012|Chr01:254064084_254064607_-	CsTGY01G0003773.t1	exonic
circRNA_01013|Chr01:254064458_254075075_-	CsTGY01G0003773.t1	exonic
circRNA_01014|Chr01:254784267_254784696_-	CsTGY01G0003800.t1	antisense
circRNA_01015|Chr01:254784706_254784952_+	CsTGY01G0003800.t1	exonic
circRNA_01016|Chr01:255078173_255078354_+	CsTGY01G0003809.t1	antisense
circRNA_01017|Chr01:255449513_255449956_+	CsTGY01G0003826.t1	exonic
circRNA_01018|Chr01:255449513_255455853_+	CsTGY01G0003826.t1	exonic
circRNA_01019|Chr01:255449513_255469868_+	CsTGY01G0003826.t1	exonic
circRNA_01020|Chr01:255449848_255455853_+	CsTGY01G0003826.t1	exonic
circRNA_01021|Chr01:255454959_255455853_+	CsTGY01G0003826.t2	sense-overlapping
circRNA_01022|Chr01:255468809_255469868_+	CsTGY01G0003826.t1	exonic
circRNA_01023|Chr01:255607645_255607840_-	CsTGY01G0003832.t1	exonic
circRNA_01024|Chr01:255700095_255700239_+	CsTGY01G0003834.t1	antisense
circRNA_01025|Chr01:256164405_256164587_-	CsTGY01G0003850.t1	exonic
circRNA_01026|Chr01:256164405_256164625_-	CsTGY01G0003850.t1	exonic
circRNA_01027|Chr01:256185985_256186988_-	CsTGY01G0003851.t1	exonic
circRNA_01028|Chr01:256186772_256186950_-	CsTGY01G0003851.t1	exonic
circRNA_01029|Chr01:256201658_256206337_-	CsTGY01G0003852.t2	exonic
circRNA_01030|Chr01:256201658_256212635_-	CsTGY01G0003852.t2	exonic
circRNA_01031|Chr01:256206098_256212635_-	CsTGY01G0003852.t2	exonic
circRNA_01032|Chr01:256206098_256214081_-	CsTGY01G0003852.t1	exonic
circRNA_01033|Chr01:256206098_256215350_-	CsTGY01G0003852.t2	exonic
circRNA_01034|Chr01:256235954_256241852_-	CsTGY01G0003853.t2	sense-overlapping
circRNA_01035|Chr01:256406662_256406814_+		intergenic
circRNA_01036|Chr01:257191709_257192194_+	CsTGY01G0003869.t1	sense-overlapping
circRNA_01037|Chr01:257194665_257195151_+		intergenic
circRNA_01038|Chr01:257194757_257194956_-		intergenic
circRNA_01039|Chr01:257194764_257195290_+		intergenic
circRNA_01040|Chr01:257194833_257195154_+		intergenic
circRNA_01041|Chr01:257194858_257195036_+		intergenic
circRNA_01042|Chr01:257194891_257195091_+		intergenic
circRNA_01043|Chr01:257194954_257195128_+		intergenic
circRNA_01044|Chr01:257195686_257197427_-	CsTGY01G0003871.t1	antisense
circRNA_01045|Chr01:257195748_257195906_+	CsTGY01G0003871.t1	exonic
circRNA_01046|Chr01:257195907_257196087_+	CsTGY01G0003871.t1	exonic
circRNA_01047|Chr01:257196849_257197015_+	CsTGY01G0003871.t1	exonic
circRNA_01048|Chr01:257197693_257198365_+	CsTGY01G0003870.t1	exonic
circRNA_01049|Chr01:257198259_257198614_-	CsTGY01G0003870.t1	antisense
circRNA_01050|Chr01:257198344_257199202_+	CsTGY01G0003870.t1	sense-overlapping
circRNA_01051|Chr01:257198438_257198827_+	CsTGY01G0003870.t1	exonic
circRNA_01052|Chr01:257198466_257198724_+	CsTGY01G0003870.t1	exonic
circRNA_01053|Chr01:257198508_257199286_+	CsTGY01G0003870.t1	sense-overlapping
circRNA_01054|Chr01:257198952_257199194_-	CsTGY01G0003870.t1	antisense
circRNA_01055|Chr01:257198979_257199294_+		intergenic
circRNA_01056|Chr01:257198992_257199202_+		intergenic
circRNA_01057|Chr01:257199046_257199284_+		intergenic
circRNA_01058|Chr01:257199052_257199528_+		intergenic
circRNA_01059|Chr01:257199174_257199502_+		intergenic
circRNA_01060|Chr01:257202406_257202536_-		intergenic
circRNA_01061|Chr01:257428703_257430879_+		intergenic
circRNA_01062|Chr01:257433662_257435537_+		intergenic
circRNA_01063|Chr01:257435447_257435646_+		intergenic
circRNA_01064|Chr01:257436162_257436578_+		intergenic
circRNA_01065|Chr01:257436744_257437074_+		intergenic
circRNA_01066|Chr01:257436744_257437229_+		intergenic
circRNA_01067|Chr01:257436750_257437028_-		intergenic
circRNA_01068|Chr01:257436750_257437032_-		intergenic
circRNA_01069|Chr01:257436750_257437051_-		intergenic
circRNA_01070|Chr01:257436750_257437089_-		intergenic
circRNA_01071|Chr01:257436750_257437119_-		intergenic
circRNA_01072|Chr01:257436750_257437249_-		intergenic
circRNA_01073|Chr01:257436750_257437354_-		intergenic
circRNA_01074|Chr01:257436750_257437434_-		intergenic
circRNA_01075|Chr01:257436750_257437884_-	CsTGY01G0003882.t1	antisense
circRNA_01076|Chr01:257436750_257437902_-	CsTGY01G0003882.t1	antisense
circRNA_01077|Chr01:257436753_257437074_+		intergenic
circRNA_01078|Chr01:257436762_257437079_+		intergenic
circRNA_01079|Chr01:257436771_257438110_+	CsTGY01G0003882.t1	sense-overlapping
circRNA_01080|Chr01:257436801_257437032_-		intergenic
circRNA_01081|Chr01:257437453_257437764_-	CsTGY01G0003882.t1	antisense
circRNA_01082|Chr01:257437460_257437668_-		intergenic
circRNA_01083|Chr01:257437460_257437752_-	CsTGY01G0003882.t1	antisense
circRNA_01084|Chr01:257437564_257437847_+	CsTGY01G0003882.t1	sense-overlapping
circRNA_01085|Chr01:257437564_257437882_+	CsTGY01G0003882.t1	sense-overlapping
circRNA_01086|Chr01:257437564_257438229_+	CsTGY01G0003882.t1	sense-overlapping
circRNA_01087|Chr01:257437564_257438544_+	CsTGY01G0003882.t1	sense-overlapping
circRNA_01088|Chr01:257437566_257437676_+		intergenic
circRNA_01089|Chr01:257437566_257437844_+	CsTGY01G0003882.t1	sense-overlapping
circRNA_01090|Chr01:257437566_257437847_+	CsTGY01G0003882.t1	sense-overlapping
circRNA_01091|Chr01:257437566_257437882_+	CsTGY01G0003882.t1	sense-overlapping
circRNA_01092|Chr01:257437566_257437909_+	CsTGY01G0003882.t1	sense-overlapping
circRNA_01093|Chr01:257437566_257437913_+	CsTGY01G0003882.t1	sense-overlapping
circRNA_01094|Chr01:257437566_257437921_+	CsTGY01G0003882.t1	sense-overlapping
circRNA_01095|Chr01:257437611_257437877_-	CsTGY01G0003882.t1	antisense
circRNA_01096|Chr01:257437636_257437844_+	CsTGY01G0003882.t1	sense-overlapping
circRNA_01097|Chr01:257437640_257437909_+	CsTGY01G0003882.t1	sense-overlapping
circRNA_01098|Chr01:257437730_257438030_+	CsTGY01G0003882.t1	sense-overlapping
circRNA_01099|Chr01:257437730_257438040_+	CsTGY01G0003882.t1	sense-overlapping
circRNA_01100|Chr01:257437730_257438229_+	CsTGY01G0003882.t1	sense-overlapping
circRNA_01101|Chr01:257438145_257438641_-	CsTGY01G0003882.t1	antisense
circRNA_01102|Chr01:257439248_257439463_+		intergenic
circRNA_01103|Chr01:257439339_257439529_-		intergenic
circRNA_01104|Chr01:257439576_257439735_+		intergenic
circRNA_01105|Chr01:257452012_257452300_+		intergenic
circRNA_01106|Chr01:257452036_257452335_-		intergenic
circRNA_01107|Chr01:257452311_257452700_-		intergenic
circRNA_01108|Chr01:257452685_257452915_+		intergenic
circRNA_01109|Chr01:257453019_257453266_+		intergenic
circRNA_01110|Chr01:257453256_257453482_+		intergenic
circRNA_01111|Chr01:257453483_257453670_+		intergenic
circRNA_01112|Chr01:257453975_257454241_+		intergenic
circRNA_01113|Chr01:257454708_257455050_+		intergenic
circRNA_01114|Chr01:257455743_257456279_-		intergenic
circRNA_01115|Chr01:257456343_257456696_+		intergenic
circRNA_01116|Chr01:257458034_257458805_-		intergenic
circRNA_01117|Chr01:257458478_257458808_-		intergenic
circRNA_01118|Chr01:257458542_257458715_+		intergenic
circRNA_01119|Chr01:257458553_257458808_-		intergenic
circRNA_01120|Chr01:257470989_257471216_+		intergenic
circRNA_01121|Chr01:257473064_257473217_-	CsTGY01G0003883.t1	antisense
circRNA_01122|Chr01:257473997_257474426_+	CsTGY01G0003883.t1	exonic
circRNA_01123|Chr01:257474340_257474881_+	CsTGY01G0003883.t1	exonic
circRNA_01124|Chr01:257474517_257474841_-	CsTGY01G0003883.t1	antisense
circRNA_01125|Chr01:257474812_257475159_+	CsTGY01G0003883.t1	sense-overlapping
circRNA_01126|Chr01:257475003_257475615_+		intergenic
circRNA_01127|Chr01:257475091_257475663_-		intergenic
circRNA_01128|Chr01:257475192_257475518_-		intergenic
circRNA_01129|Chr01:257475478_257475852_-		intergenic
circRNA_01130|Chr01:257475548_257475706_-		intergenic
circRNA_01131|Chr01:257475776_257476043_+		intergenic
circRNA_01132|Chr01:257475786_257476018_+		intergenic
circRNA_01133|Chr01:257475797_257476051_+		intergenic
circRNA_01134|Chr01:257501222_257501434_+		intergenic
circRNA_01135|Chr01:257501251_257502950_+		intergenic
circRNA_01136|Chr01:257501383_257502686_+		intergenic
circRNA_01137|Chr01:257501446_257502444_+		intergenic
circRNA_01138|Chr01:257502723_257502983_-		intergenic
circRNA_01139|Chr01:257502776_257503145_+	CsTGY01G0003887.t1	sense-overlapping
circRNA_01140|Chr01:257503094_257503430_-	CsTGY01G0003887.t1	antisense
circRNA_01141|Chr01:257738388_257740839_+	CsTGY01G0003895.t1	sense-overlapping
circRNA_01142|Chr01:257739287_257739476_+		intergenic
circRNA_01143|Chr01:257739865_257740174_-		intergenic
circRNA_01144|Chr01:257740657_257740834_-	CsTGY01G0003895.t1	antisense
circRNA_01145|Chr01:257740707_257740906_+	CsTGY01G0003895.t1	exonic
circRNA_01146|Chr01:257740714_257740870_-	CsTGY01G0003895.t1	antisense
circRNA_01147|Chr01:257741050_257741264_+	CsTGY01G0003895.t1	exonic
circRNA_01148|Chr01:257741057_257741390_+	CsTGY01G0003895.t1	exonic
circRNA_01149|Chr01:257741313_257741545_-	CsTGY01G0003895.t1	antisense
circRNA_01150|Chr01:257741313_257741549_-	CsTGY01G0003895.t1	antisense
circRNA_01151|Chr01:257741341_257741549_-	CsTGY01G0003895.t1	antisense
circRNA_01152|Chr01:257741352_257741549_-	CsTGY01G0003895.t1	antisense
circRNA_01153|Chr01:257741362_257741750_-	CsTGY01G0003895.t1	antisense
circRNA_01154|Chr01:257741397_257741549_-	CsTGY01G0003895.t1	antisense
circRNA_01155|Chr01:257741414_257741927_+	CsTGY01G0003895.t1	sense-overlapping
circRNA_01156|Chr01:257741420_257741798_-	CsTGY01G0003895.t1	antisense
circRNA_01157|Chr01:257741521_257741835_+	CsTGY01G0003895.t1	sense-overlapping
circRNA_01158|Chr01:257741563_257742761_+		intergenic
circRNA_01159|Chr01:257741865_257742228_+		intergenic
circRNA_01160|Chr01:257742478_257742867_+		intergenic
circRNA_01161|Chr01:257742624_257742881_+		intergenic
circRNA_01162|Chr01:257742697_257742884_-		intergenic
circRNA_01163|Chr01:257742697_257742896_-		intergenic
circRNA_01164|Chr01:257742703_257742881_+		intergenic
circRNA_01165|Chr01:257742741_257743122_-		intergenic
circRNA_01166|Chr01:257742758_257742914_+		intergenic
circRNA_01167|Chr01:257742767_257743022_-		intergenic
circRNA_01168|Chr01:257742767_257743149_-		intergenic
circRNA_01169|Chr01:257742889_257743181_+		intergenic
circRNA_01170|Chr01:257743193_257743709_-	CsTGY01G0003896.t1	antisense
circRNA_01171|Chr01:259608542_259608903_+	CsTGY01G0003919.t1	exonic
circRNA_01172|Chr02:1453443_1457097_+	CsTGY02G0000008.t1	exonic
circRNA_01173|Chr02:1463038_1463313_+	CsTGY02G0000008.t1	intronic
circRNA_01174|Chr02:1463067_1463313_+	CsTGY02G0000008.t1	intronic
circRNA_01175|Chr02:1493688_1494178_+	CsTGY02G0000008.t1	exonic
circRNA_01176|Chr02:1494067_1506760_+	CsTGY02G0000008.t1	exonic
circRNA_01177|Chr02:1533284_1533527_-	CsTGY02G0000010.t1	antisense
circRNA_01178|Chr02:1560057_1560397_-	CsTGY02G0000011.t1	intronic
circRNA_01179|Chr02:1566989_1567293_-	CsTGY02G0000011.t1	exonic
circRNA_01180|Chr02:1568619_1568788_-		intergenic
circRNA_01181|Chr02:1632520_1632698_+	CsTGY02G0000013.t1	exonic
circRNA_01182|Chr02:1660160_1660307_-	CsTGY02G0000016.t1	exonic
circRNA_01183|Chr02:1666788_1667015_-	CsTGY02G0000016.t1	exonic
circRNA_01184|Chr02:1697105_1697338_-		intergenic
circRNA_01185|Chr02:1724435_1724899_-	CsTGY02G0000020.t1	exonic
circRNA_01186|Chr02:1724435_1728128_-	CsTGY02G0000020.t1	exonic
circRNA_01187|Chr02:1726481_1726670_-	CsTGY02G0000020.t1	exonic
circRNA_01188|Chr02:1918896_1919181_+	CsTGY02G0000021.t1	exonic
circRNA_01189|Chr02:2347408_2353841_+	CsTGY02G0000033.t1	antisense
circRNA_01190|Chr02:2400710_2405756_-	CsTGY02G0000036.t1	exonic
circRNA_01191|Chr02:2537117_2537362_-	CsTGY02G0000041.t1	exonic
circRNA_01192|Chr02:2737054_2737331_-	CsTGY02G0000050.t1	antisense
circRNA_01193|Chr02:4081678_4081856_+	CsTGY02G0000070.t1	antisense
circRNA_01194|Chr02:4200953_4201134_-	CsTGY02G0000075.t1	antisense
circRNA_01195|Chr02:4824426_4824690_+	CsTGY02G0000101.t1	exonic
circRNA_01196|Chr02:4830397_4831017_+	CsTGY02G0000101.t1	exonic
circRNA_01197|Chr02:4830532_4830694_+	CsTGY02G0000101.t1	exonic
circRNA_01198|Chr02:4830892_4832736_+	CsTGY02G0000101.t1	exonic
circRNA_01199|Chr02:4840130_4840339_-	CsTGY02G0000102.t1	antisense
circRNA_01200|Chr02:4844738_4845147_+	CsTGY02G0000103.t1	exonic
circRNA_01201|Chr02:5448224_5450455_-	CsTGY02G0000125.t1	exonic
circRNA_01202|Chr02:5488234_5488413_-	CsTGY02G0000128.t1	exonic
circRNA_01203|Chr02:5571544_5571699_+	CsTGY02G0000131.t1	exonic
circRNA_01204|Chr02:5652020_5652163_+	CsTGY02G0000136.t1	antisense
circRNA_01205|Chr02:6012035_6014076_+		intergenic
circRNA_01206|Chr02:6055799_6058960_-	CsTGY02G0000146.t1	exonic
circRNA_01207|Chr02:6114980_6115153_+	CsTGY02G0000147.t1	antisense
circRNA_01208|Chr02:6233709_6314898_-	CsTGY02G0000151.t1	sense-overlapping
circRNA_01209|Chr02:6311647_6311844_-	CsTGY02G0000151.t1	intronic
circRNA_01210|Chr02:6444239_6444422_+	CsTGY02G0000158.t1	exonic
circRNA_01211|Chr02:6444248_6444422_+	CsTGY02G0000158.t1	exonic
circRNA_01212|Chr02:6507017_6508676_+	CsTGY02G0000160.t1	exonic
circRNA_01213|Chr02:6510192_6510396_-	CsTGY02G0000161.t1	exonic
circRNA_01214|Chr02:6510279_6510506_-	CsTGY02G0000161.t1	exonic
circRNA_01215|Chr02:6510419_6510588_-	CsTGY02G0000161.t1	exonic
circRNA_01216|Chr02:6511359_6511834_-	CsTGY02G0000161.t1	exonic
circRNA_01217|Chr02:6512319_6513172_-	CsTGY02G0000161.t1	exonic
circRNA_01218|Chr02:6514518_6515755_-	CsTGY02G0000161.t1	exonic
circRNA_01219|Chr02:6665900_6666037_-		intergenic
circRNA_01220|Chr02:6666171_6666308_+		intergenic
circRNA_01221|Chr02:6982837_6983033_+	CsTGY02G0000171.t1	exonic
circRNA_01222|Chr02:6989279_6991397_+	CsTGY02G0000172.t1	exonic
circRNA_01223|Chr02:6999528_7001845_-	CsTGY02G0000173.t1	exonic
circRNA_01224|Chr02:7268572_7268780_-	CsTGY02G0000180.t1	exonic
circRNA_01225|Chr02:7272665_7274732_-	CsTGY02G0000181.t1	sense-overlapping
circRNA_01226|Chr02:7273070_7274732_-	CsTGY02G0000181.t1	exonic
circRNA_01227|Chr02:7804611_7804822_+	CsTGY02G0000192.t1	exonic
circRNA_01228|Chr02:7971905_7972139_-	CsTGY02G0000198.t1	exonic
circRNA_01229|Chr02:8939124_8939252_-	CsTGY02G0000219.t1	antisense
circRNA_01230|Chr02:8953397_8953807_+	CsTGY02G0000221.t1	exonic
circRNA_01231|Chr02:8953429_8953554_+	CsTGY02G0000221.t1	exonic
circRNA_01232|Chr02:8957994_8958170_+	CsTGY02G0000222.t2	antisense
circRNA_01233|Chr02:8960603_8960754_-	CsTGY02G0000222.t2	exonic
circRNA_01234|Chr02:9130613_9130762_+	CsTGY02G0000226.t1	antisense
circRNA_01235|Chr02:9156402_9156937_+	CsTGY02G0000228.t1	exonic
circRNA_01236|Chr02:10101927_10102890_+	CsTGY02G0000241.t1	exonic
circRNA_01237|Chr02:10384201_10384356_+	CsTGY02G0000248.t1	exonic
circRNA_01238|Chr02:10628167_10628370_-		intergenic
circRNA_01239|Chr02:10715092_10716068_+	CsTGY02G0000255.t1	exonic
circRNA_01240|Chr02:10715170_10716068_+	CsTGY02G0000255.t1	exonic
circRNA_01241|Chr02:10912236_10912402_-	CsTGY02G0000264.t1	antisense
circRNA_01242|Chr02:11988873_11989097_-	CsTGY02G0000291.t1	exonic
circRNA_01243|Chr02:12048133_12048322_-	CsTGY02G0000293.t1	antisense
circRNA_01244|Chr02:12048613_12048768_+	CsTGY02G0000293.t1	exonic
circRNA_01245|Chr02:12387683_12387872_-	CsTGY02G0000310.t1	exonic
circRNA_01246|Chr02:12805908_12806597_+	CsTGY02G0000311.t1	exonic
circRNA_01247|Chr02:12809814_12809976_+	CsTGY02G0000311.t1	exonic
circRNA_01248|Chr02:12892589_12894355_-	CsTGY02G0000314.t1	exonic
circRNA_01249|Chr02:12965033_12965239_+	CsTGY02G0000315.t1	exonic
circRNA_01250|Chr02:12968199_12968384_-	CsTGY02G0000315.t1	antisense
circRNA_01251|Chr02:12970338_12970507_+	CsTGY02G0000315.t1	intronic
circRNA_01252|Chr02:13173849_13174005_-	CsTGY02G0000321.t1	intronic
circRNA_01253|Chr02:13187486_13188628_-	CsTGY02G0000322.t1	exonic
circRNA_01254|Chr02:13220366_13225783_-		intergenic
circRNA_01255|Chr02:13362647_13362820_+	CsTGY02G0000328.t1	exonic
circRNA_01256|Chr02:13581424_13581591_+		intergenic
circRNA_01257|Chr02:13581739_13581891_+		intergenic
circRNA_01258|Chr02:13581892_13582059_+		intergenic
circRNA_01259|Chr02:13759184_13762349_+	CsTGY02G0000340.t1	exonic
circRNA_01260|Chr02:13836684_13836900_-	CsTGY02G0000343.t1	exonic
circRNA_01261|Chr02:14396856_14397008_+	CsTGY02G0000347.t1	intronic
circRNA_01262|Chr02:15379091_15379262_-	CsTGY02G0000364.t1	exonic
circRNA_01263|Chr02:15379099_15379262_-	CsTGY02G0000364.t1	exonic
circRNA_01264|Chr02:15470950_15471184_-		intergenic
circRNA_01265|Chr02:15531005_15531267_+	CsTGY02G0000368.t1	exonic
circRNA_01266|Chr02:15590924_15591177_+	CsTGY02G0000370.t1	exonic
circRNA_01267|Chr02:15592571_15592981_+	CsTGY02G0000370.t1	exonic
circRNA_01268|Chr02:15594263_15594431_+	CsTGY02G0000371.t1	antisense
circRNA_01269|Chr02:15751260_15751765_-	CsTGY02G0000377.t1	exonic
circRNA_01270|Chr02:16104271_16104545_+	CsTGY02G0000384.t1	exonic
circRNA_01271|Chr02:16113365_16113494_-	CsTGY02G0000384.t1	antisense
circRNA_01272|Chr02:16115688_16117006_+	CsTGY02G0000384.t1	exonic
circRNA_01273|Chr02:16115688_16123069_+	CsTGY02G0000384.t1	exonic
circRNA_01274|Chr02:16115688_16123829_+	CsTGY02G0000384.t1	exonic
circRNA_01275|Chr02:16122898_16123829_+	CsTGY02G0000384.t1	exonic
circRNA_01276|Chr02:16122898_16145285_+	CsTGY02G0000384.t1	sense-overlapping
circRNA_01277|Chr02:16122898_16146796_+	CsTGY02G0000384.t1	sense-overlapping
circRNA_01278|Chr02:16122910_16123829_+	CsTGY02G0000384.t1	exonic
circRNA_01279|Chr02:16122910_16146796_+	CsTGY02G0000384.t1	sense-overlapping
circRNA_01280|Chr02:16122947_16146796_+	CsTGY02G0000384.t1	sense-overlapping
circRNA_01281|Chr02:16123634_16145285_+	CsTGY02G0000384.t1	sense-overlapping
circRNA_01282|Chr02:16145153_16146796_+		intergenic
circRNA_01283|Chr02:16152078_16152299_-	CsTGY02G0000385.t1	antisense
circRNA_01284|Chr02:16162653_16163015_+	CsTGY02G0000386.t1	exonic
circRNA_01285|Chr02:16169788_16170042_+	CsTGY02G0000386.t2	exonic
circRNA_01286|Chr02:16177054_16177201_+	CsTGY02G0000386.t2	exonic
circRNA_01287|Chr02:16179358_16179520_+	CsTGY02G0000386.t2	exonic
circRNA_01288|Chr02:16179763_16179853_+	CsTGY02G0000386.t2	exonic
circRNA_01289|Chr02:16184832_16185540_+	CsTGY02G0000386.t2	exonic
circRNA_01290|Chr02:16186819_16187001_+	CsTGY02G0000386.t2	exonic
circRNA_01291|Chr02:16186926_16187256_+	CsTGY02G0000386.t2	exonic
circRNA_01292|Chr02:16187047_16187218_-	CsTGY02G0000386.t2	antisense
circRNA_01293|Chr02:16187425_16188362_-	CsTGY02G0000386.t2	antisense
circRNA_01294|Chr02:16188002_16188155_+	CsTGY02G0000386.t2	exonic
circRNA_01295|Chr02:16267743_16267898_+	CsTGY02G0000388.t1	exonic
circRNA_01296|Chr02:16291069_16291226_+	CsTGY02G0000392.t1	exonic
circRNA_01297|Chr02:16388530_16388725_-	CsTGY02G0000395.t2	exonic
circRNA_01298|Chr02:16466602_16468783_+	CsTGY02G0000397.t1	exonic
circRNA_01299|Chr02:16478317_16478479_+	CsTGY02G0000397.t1	exonic
circRNA_01300|Chr02:16483895_16485591_-	CsTGY02G0000398.t1	exonic
circRNA_01301|Chr02:16563077_16563226_-	CsTGY02G0000399.t1	antisense
circRNA_01302|Chr02:16946873_16947194_-	CsTGY02G0000407.t1	exonic
circRNA_01303|Chr02:16994131_16994327_+	CsTGY02G0000411.t1	antisense
circRNA_01304|Chr02:17486119_17486266_+	CsTGY02G0000414.t1	exonic
circRNA_01305|Chr02:17574439_17574730_-	CsTGY02G0000419.t1	antisense
circRNA_01306|Chr02:17838260_17838509_-	CsTGY02G0000426.t1	exonic
circRNA_01307|Chr02:17839336_17839582_-	CsTGY02G0000426.t1	exonic
circRNA_01308|Chr02:17841234_17841386_-	CsTGY02G0000426.t1	exonic
circRNA_01309|Chr02:18322689_18326406_-	CsTGY02G0000441.t1	exonic
circRNA_01310|Chr02:18560366_18560579_-	CsTGY02G0000443.t1	antisense
circRNA_01311|Chr02:18970791_18970960_-	CsTGY02G0000455.t1	exonic
circRNA_01312|Chr02:19067229_19122502_-	CsTGY02G0000459.t1	sense-overlapping
circRNA_01313|Chr02:19218799_19218989_-	CsTGY02G0000462.t1	exonic
circRNA_01314|Chr02:19673092_19673291_-	CsTGY02G0000465.t1	sense-overlapping
circRNA_01315|Chr02:19687997_19688374_-	CsTGY02G0000466.t1	exonic
circRNA_01316|Chr02:19709896_19710086_-	CsTGY02G0000468.t1	antisense
circRNA_01317|Chr02:19710002_19710228_+	CsTGY02G0000468.t1	exonic
circRNA_01318|Chr02:19710152_19710408_+	CsTGY02G0000468.t1	exonic
circRNA_01319|Chr02:19869907_19870243_+		intergenic
circRNA_01320|Chr02:19991354_19991532_-	CsTGY02G0000471.t1	antisense
circRNA_01321|Chr02:20021099_20021400_-	CsTGY02G0000473.t2	exonic
circRNA_01322|Chr02:20025235_20025426_-	CsTGY02G0000473.t2	exonic
circRNA_01323|Chr02:20616361_20616489_-	CsTGY02G0000492.t1	exonic
circRNA_01324|Chr02:20905524_20909105_-	CsTGY02G0000504.t1	exonic
circRNA_01325|Chr02:20922052_20922165_-	CsTGY02G0000504.t1	exonic
circRNA_01326|Chr02:21102627_21103053_-	CsTGY02G0000505.t1	exonic
circRNA_01327|Chr02:22305475_22306258_+	CsTGY02G0000523.t1	exonic
circRNA_01328|Chr02:23852706_23852869_-	CsTGY02G0000543.t1	antisense
circRNA_01329|Chr02:24059682_24059960_+	CsTGY02G0000547.t1	exonic
circRNA_01330|Chr02:24059910_24060091_+	CsTGY02G0000547.t1	exonic
circRNA_01331|Chr02:24060028_24060389_+	CsTGY02G0000547.t1	exonic
circRNA_01332|Chr02:24098468_24098674_-	CsTGY02G0000549.t1	exonic
circRNA_01333|Chr02:24098542_24098709_-	CsTGY02G0000549.t1	exonic
circRNA_01334|Chr02:24234186_24234340_-	CsTGY02G0000551.t1	antisense
circRNA_01335|Chr02:24236284_24236455_+	CsTGY02G0000551.t1	exonic
circRNA_01336|Chr02:24560029_24561307_-	CsTGY02G0000564.t1	exonic
circRNA_01337|Chr02:25420133_25420527_+	CsTGY02G0000583.t1	exonic
circRNA_01338|Chr02:26204143_26238390_+	CsTGY02G0000597.t1	sense-overlapping
circRNA_01339|Chr02:26204567_26239086_+	CsTGY02G0000597.t1	sense-overlapping
circRNA_01340|Chr02:26589831_26590123_-	CsTGY02G0000606.t1	exonic
circRNA_01341|Chr02:27035513_27050076_-	CsTGY02G0000615.t1	antisense
circRNA_01342|Chr02:27037032_27051453_-	CsTGY02G0000616.t1	sense-overlapping
circRNA_01343|Chr02:27130547_27130765_+	CsTGY02G0000619.t1	antisense
circRNA_01344|Chr02:27135571_27135806_-	CsTGY02G0000619.t1	exonic
circRNA_01345|Chr02:27192087_27192535_+		intergenic
circRNA_01346|Chr02:28280381_28281714_+	CsTGY02G0000634.t1	exonic
circRNA_01347|Chr02:28379536_28379725_+	CsTGY02G0000636.t1	antisense
circRNA_01348|Chr02:28380851_28381012_+	CsTGY02G0000636.t1	antisense
circRNA_01349|Chr02:28382814_28383343_-	CsTGY02G0000636.t1	exonic
circRNA_01350|Chr02:28383552_28385831_-	CsTGY02G0000636.t1	exonic
circRNA_01351|Chr02:28456472_28456667_+	CsTGY02G0000638.t1	intronic
circRNA_01352|Chr02:28461142_28461267_-	CsTGY02G0000638.t1	antisense
circRNA_01353|Chr02:28461236_28461494_-	CsTGY02G0000638.t1	antisense
circRNA_01354|Chr02:28590177_28590328_+	CsTGY02G0000639.t1	intronic
circRNA_01355|Chr02:28658568_28658768_+	CsTGY02G0000641.t2	antisense
circRNA_01356|Chr02:28660133_28660321_+	CsTGY02G0000641.t3	antisense
circRNA_01357|Chr02:28662432_28662687_-	CsTGY02G0000641.t3	exonic
circRNA_01358|Chr02:28662726_28662938_-	CsTGY02G0000641.t2	exonic
circRNA_01359|Chr02:29184179_29185475_+	CsTGY02G0000657.t1	exonic
circRNA_01360|Chr02:29474339_29476542_-	CsTGY02G0000661.t1	exonic
circRNA_01361|Chr02:29630370_29630497_-	CsTGY02G0000666.t1	exonic
circRNA_01362|Chr02:29659183_29659428_-	CsTGY02G0000667.t1	exonic
circRNA_01363|Chr02:30207773_30208055_-	CsTGY02G0000687.t1	intronic
circRNA_01364|Chr02:30263744_30266397_+	CsTGY02G0000689.t3	antisense
circRNA_01365|Chr02:30676700_30676835_+		intergenic
circRNA_01366|Chr02:31556089_31556455_+	CsTGY02G0000702.t1	exonic
circRNA_01367|Chr02:31740421_31740575_+	CsTGY02G0000709.t1	exonic
circRNA_01368|Chr02:32183762_32183916_+	CsTGY02G0000716.t1	intronic
circRNA_01369|Chr02:32183821_32183975_+	CsTGY02G0000716.t1	intronic
circRNA_01370|Chr02:32605850_32609962_+	CsTGY02G0000733.t1	exonic
circRNA_01371|Chr02:32691965_32692336_-	CsTGY02G0000737.t1	exonic
circRNA_01372|Chr02:32696758_32697111_-	CsTGY02G0000737.t1	exonic
circRNA_01373|Chr02:32945064_32950247_+	CsTGY02G0000743.t3	exonic
circRNA_01374|Chr02:32945341_32950247_+	CsTGY02G0000743.t3	exonic
circRNA_01375|Chr02:32971777_32971932_+		intergenic
circRNA_01376|Chr02:32973642_32987913_-	CsTGY02G0000746.t1	sense-overlapping
circRNA_01377|Chr02:33405864_33406070_+	CsTGY02G0000751.t1	exonic
circRNA_01378|Chr02:33421424_33421591_-	CsTGY02G0000752.t1	antisense
circRNA_01379|Chr02:33428788_33457374_+	CsTGY02G0000753.t1	sense-overlapping
circRNA_01380|Chr02:33556715_33558306_-	CsTGY02G0000755.t1	exonic
circRNA_01381|Chr02:33563743_33563953_-	CsTGY02G0000755.t1	intronic
circRNA_01382|Chr02:33761706_33761870_+		intergenic
circRNA_01383|Chr02:33761746_33761870_+		intergenic
circRNA_01384|Chr02:33762039_33762254_+		intergenic
circRNA_01385|Chr02:33764245_33764436_+		intergenic
circRNA_01386|Chr02:33878416_33878598_+	CsTGY02G0000762.t1	exonic
circRNA_01387|Chr02:33878428_33878598_+	CsTGY02G0000762.t1	exonic
circRNA_01388|Chr02:33889414_33889585_+	CsTGY02G0000763.t1	intronic
circRNA_01389|Chr02:34394281_34394447_+	CsTGY02G0000767.t1	intronic
circRNA_01390|Chr02:34501472_34501655_+	CsTGY02G0000770.t1	exonic
circRNA_01391|Chr02:34623056_34623233_-		intergenic
circRNA_01392|Chr02:34623077_34623323_+		intergenic
circRNA_01393|Chr02:34623345_34623514_+		intergenic
circRNA_01394|Chr02:34623506_34623707_+		intergenic
circRNA_01395|Chr02:34623506_34623709_+		intergenic
circRNA_01396|Chr02:34623506_34623714_+		intergenic
circRNA_01397|Chr02:34623563_34623714_+		intergenic
circRNA_01398|Chr02:34623673_34623831_+		intergenic
circRNA_01399|Chr02:34625546_34625655_+		intergenic
circRNA_01400|Chr02:34626061_34626230_+		intergenic
circRNA_01401|Chr02:34626066_34626344_+		intergenic
circRNA_01402|Chr02:34626205_34626355_+		intergenic
circRNA_01403|Chr02:34626516_34626821_-		intergenic
circRNA_01404|Chr02:34677316_34677583_-	CsTGY02G0000774.t1	exonic
circRNA_01405|Chr02:34689256_34689522_-	CsTGY02G0000775.t1	exonic
circRNA_01406|Chr02:34689412_34689782_-	CsTGY02G0000775.t1	exonic
circRNA_01407|Chr02:35010066_35011577_+	CsTGY02G0000782.t1	exonic
circRNA_01408|Chr02:35086117_35086259_-	CsTGY02G0000786.t1	exonic
circRNA_01409|Chr02:35180726_35222257_+	CsTGY02G0000790.t1	sense-overlapping
circRNA_01410|Chr02:35218963_35219116_-	CsTGY02G0000791.t1	antisense
circRNA_01411|Chr02:35235180_35235472_+	CsTGY02G0000792.t1	antisense
circRNA_01412|Chr02:35826995_35827144_-	CsTGY02G0000806.t1	exonic
circRNA_01413|Chr02:36902352_36902520_-	CsTGY02G0000830.t1	antisense
circRNA_01414|Chr02:37105589_37105882_-	CsTGY02G0000836.t1	antisense
circRNA_01415|Chr02:37737178_37737421_+	CsTGY02G0000850.t1	exonic
circRNA_01416|Chr02:37737275_37737379_+	CsTGY02G0000851.t1	exonic
circRNA_01417|Chr02:37898864_37899068_-	CsTGY02G0000861.t1	exonic
circRNA_01418|Chr02:37899120_37899286_+	CsTGY02G0000861.t1	antisense
circRNA_01419|Chr02:37946034_37948521_+	CsTGY02G0000863.t1	exonic
circRNA_01420|Chr02:37963348_37963603_+	CsTGY02G0000863.t1	exonic
circRNA_01421|Chr02:37963348_37964175_+	CsTGY02G0000863.t1	exonic
circRNA_01422|Chr02:37963505_37966387_+	CsTGY02G0000863.t2	exonic
circRNA_01423|Chr02:37966462_37967761_+	CsTGY02G0000863.t1	exonic
circRNA_01424|Chr02:37967177_37967761_+	CsTGY02G0000863.t1	exonic
circRNA_01425|Chr02:37972858_37975334_+	CsTGY02G0000863.t2	exonic
circRNA_01426|Chr02:37974666_37974839_+	CsTGY02G0000863.t2	exonic
circRNA_01427|Chr02:37975128_37976837_+	CsTGY02G0000863.t1	exonic
circRNA_01428|Chr02:37975183_37976054_+	CsTGY02G0000863.t2	exonic
circRNA_01429|Chr02:37976009_37982527_+	CsTGY02G0000863.t1	exonic
circRNA_01430|Chr02:37976498_37979095_+	CsTGY02G0000863.t1	exonic
circRNA_01431|Chr02:37977778_37977990_+	CsTGY02G0000863.t2	exonic
circRNA_01432|Chr02:37979175_37979465_+	CsTGY02G0000863.t1	exonic
circRNA_01433|Chr02:37981667_37982218_+	CsTGY02G0000863.t1	exonic
circRNA_01434|Chr02:37981712_37981956_+	CsTGY02G0000863.t2	exonic
circRNA_01435|Chr02:37982056_37982438_-	CsTGY02G0000863.t1	antisense
circRNA_01436|Chr02:38047503_38047676_+	CsTGY02G0000866.t1	exonic
circRNA_01437|Chr02:38733971_38735333_-	CsTGY02G0000874.t1	exonic
circRNA_01438|Chr02:39360843_39362035_+	CsTGY02G0000879.t1	sense-overlapping
circRNA_01439|Chr02:39361907_39363658_+	CsTGY02G0000879.t1	exonic
circRNA_01440|Chr02:39362031_39362554_+	CsTGY02G0000879.t1	exonic
circRNA_01441|Chr02:40291285_40292570_+	CsTGY02G0000889.t1	exonic
circRNA_01442|Chr02:40292958_40293270_+	CsTGY02G0000889.t1	exonic
circRNA_01443|Chr02:40301864_40302014_+	CsTGY02G0000889.t1	exonic
circRNA_01444|Chr02:40372364_40372527_-	CsTGY02G0000891.t1	antisense
circRNA_01445|Chr02:40493485_40508352_-	CsTGY02G0000895.t1	exonic
circRNA_01446|Chr02:40501797_40508352_-	CsTGY02G0000895.t1	exonic
circRNA_01447|Chr02:40503513_40505467_-	CsTGY02G0000895.t1	exonic
circRNA_01448|Chr02:40503513_40508352_-	CsTGY02G0000895.t1	exonic
circRNA_01449|Chr02:40505778_40508352_-	CsTGY02G0000895.t1	exonic
circRNA_01450|Chr02:40506460_40508352_-	CsTGY02G0000895.t1	exonic
circRNA_01451|Chr02:40687668_40687989_-	CsTGY02G0000900.t1	exonic
circRNA_01452|Chr02:40687853_40687953_-	CsTGY02G0000900.t1	exonic
circRNA_01453|Chr02:41269771_41269972_-	CsTGY02G0000911.t1	exonic
circRNA_01454|Chr02:41340354_41340532_-	CsTGY02G0000914.t1	exonic
circRNA_01455|Chr02:41467009_41467147_-	CsTGY02G0000918.t1	antisense
circRNA_01456|Chr02:41772699_41772845_+	CsTGY02G0000924.t1	exonic
circRNA_01457|Chr02:41776545_41777938_+	CsTGY02G0000924.t1	exonic
circRNA_01458|Chr02:41917206_41951432_+	CsTGY02G0000932.t1	sense-overlapping
circRNA_01459|Chr02:42146482_42146717_+		intergenic
circRNA_01460|Chr02:42289597_42292495_+	CsTGY02G0000937.t1	exonic
circRNA_01461|Chr02:42560451_42560611_-	CsTGY02G0000943.t1	intronic
circRNA_01462|Chr02:42636747_42636982_-	CsTGY02G0000946.t1	exonic
circRNA_01463|Chr02:42636990_42637212_-	CsTGY02G0000946.t1	exonic
circRNA_01464|Chr02:42637098_42637284_-	CsTGY02G0000946.t1	exonic
circRNA_01465|Chr02:42714038_42714267_+	CsTGY02G0000947.t1	exonic
circRNA_01466|Chr02:42748127_42748337_+	CsTGY02G0000949.t1	exonic
circRNA_01467|Chr02:43154897_43155076_+	CsTGY02G0000955.t1	exonic
circRNA_01468|Chr02:43175324_43182118_+	CsTGY02G0000955.t1	exonic
circRNA_01469|Chr02:43180702_43182118_+	CsTGY02G0000955.t1	exonic
circRNA_01470|Chr02:43180702_43184847_+	CsTGY02G0000955.t1	exonic
circRNA_01471|Chr02:43180702_43186768_+	CsTGY02G0000955.t1	exonic
circRNA_01472|Chr02:43180702_43186781_+	CsTGY02G0000955.t1	exonic
circRNA_01473|Chr02:43186277_43186781_+	CsTGY02G0000955.t1	exonic
circRNA_01474|Chr02:43325128_43325280_-	CsTGY02G0000958.t1	antisense
circRNA_01475|Chr02:43328962_43329176_+	CsTGY02G0000958.t1	exonic
circRNA_01476|Chr02:43504091_43504859_-	CsTGY02G0000964.t1	exonic
circRNA_01477|Chr02:43777437_43777756_+	CsTGY02G0000968.t1	exonic
circRNA_01478|Chr02:43783571_43783800_+	CsTGY02G0000968.t1	exonic
circRNA_01479|Chr02:43941805_43942020_-	CsTGY02G0000974.t1	exonic
circRNA_01480|Chr02:43977881_43978061_-	CsTGY02G0000975.t1	intronic
circRNA_01481|Chr02:44294565_44294723_-	CsTGY02G0000978.t1	exonic
circRNA_01482|Chr02:44581020_44581333_+	CsTGY02G0000983.t1	antisense
circRNA_01483|Chr02:44675649_44675823_+	CsTGY02G0000985.t1	antisense
circRNA_01484|Chr02:44703686_44703809_-	CsTGY02G0000988.t1	antisense
circRNA_01485|Chr02:44950139_44951372_-	CsTGY02G0000993.t1	sense-overlapping
circRNA_01486|Chr02:44952759_44952923_-	CsTGY02G0000994.t1	exonic
circRNA_01487|Chr02:45464884_45465215_-	CsTGY02G0001003.t1	exonic
circRNA_01488|Chr02:45531452_45607231_-	CsTGY02G0001006.t1	antisense
circRNA_01489|Chr02:45969022_45969226_+	CsTGY02G0001009.t1	exonic
circRNA_01490|Chr02:46608983_46609585_+	CsTGY02G0001016.t1	exonic
circRNA_01491|Chr02:46614312_46614511_-		intergenic
circRNA_01492|Chr02:46703624_46704065_+	CsTGY02G0001017.t1	exonic
circRNA_01493|Chr02:46903534_46906912_-	CsTGY02G0001022.t1	exonic
circRNA_01494|Chr02:46903534_46913269_-	CsTGY02G0001022.t1	exonic
circRNA_01495|Chr02:46906825_46913269_-	CsTGY02G0001022.t1	exonic
circRNA_01496|Chr02:47118777_47118954_+	CsTGY02G0001031.t1	antisense
circRNA_01497|Chr02:47275458_47275632_-		intergenic
circRNA_01498|Chr02:47327407_47366505_-	CsTGY02G0001037.t1	sense-overlapping
circRNA_01499|Chr02:47445475_47445764_-	CsTGY02G0001038.t1	exonic
circRNA_01500|Chr02:48540942_48560796_-	CsTGY02G0001052.t1	antisense
circRNA_01501|Chr02:48566438_48566642_-	CsTGY02G0001053.t1	exonic
circRNA_01502|Chr02:48566446_48566642_-	CsTGY02G0001053.t1	exonic
circRNA_01503|Chr02:48625174_48625442_-	CsTGY02G0001054.t1	exonic
circRNA_01504|Chr02:48627597_48631427_-	CsTGY02G0001054.t1	exonic
circRNA_01505|Chr02:48627597_48631443_-	CsTGY02G0001054.t1	exonic
circRNA_01506|Chr02:48627597_48653990_-	CsTGY02G0001054.t1	exonic
circRNA_01507|Chr02:48647066_48647277_-	CsTGY02G0001054.t1	intronic
circRNA_01508|Chr02:48648374_48653990_-	CsTGY02G0001054.t1	exonic
circRNA_01509|Chr02:48652169_48653990_-	CsTGY02G0001054.t1	exonic
circRNA_01510|Chr02:48671659_48674844_-	CsTGY02G0001055.t1	exonic
circRNA_01511|Chr02:48671659_48678292_-	CsTGY02G0001055.t1	exonic
circRNA_01512|Chr02:49325446_49325642_+	CsTGY02G0001063.t1	exonic
circRNA_01513|Chr02:49332171_49339511_-		intergenic
circRNA_01514|Chr02:49332217_49332420_+		intergenic
circRNA_01515|Chr02:49332471_49339823_-		intergenic
circRNA_01516|Chr02:49388289_49388474_-	CsTGY02G0001065.t1	antisense
circRNA_01517|Chr02:49659152_49659383_-		intergenic
circRNA_01518|Chr02:49816737_49818048_-	CsTGY02G0001072.t3	exonic
circRNA_01519|Chr02:49818746_49819355_-	CsTGY02G0001072.t2	exonic
circRNA_01520|Chr02:49857322_49858102_-	CsTGY02G0001073.t1	exonic
circRNA_01521|Chr02:49858899_49862332_-	CsTGY02G0001073.t1	exonic
circRNA_01522|Chr02:49863927_49879099_-	CsTGY02G0001073.t1	exonic
circRNA_01523|Chr02:49864440_49879099_-	CsTGY02G0001073.t1	exonic
circRNA_01524|Chr02:49865248_49879099_-	CsTGY02G0001073.t1	exonic
circRNA_01525|Chr02:49870982_49881452_-	CsTGY02G0001073.t1	exonic
circRNA_01526|Chr02:52364297_52459057_+	CsTGY02G0001109.t1	sense-overlapping
circRNA_01527|Chr02:53149909_53153117_+	CsTGY02G0001123.t2	exonic
circRNA_01528|Chr02:53248872_53249087_-	CsTGY02G0001125.t1	exonic
circRNA_01529|Chr02:53249277_53249468_-	CsTGY02G0001125.t1	exonic
circRNA_01530|Chr02:53252822_53253752_-	CsTGY02G0001125.t1	exonic
circRNA_01531|Chr02:53253459_53253662_-	CsTGY02G0001125.t1	exonic
circRNA_01532|Chr02:53334434_53334796_-	CsTGY02G0001130.t1	exonic
circRNA_01533|Chr02:54110538_54121292_-	CsTGY02G0001147.t1	exonic
circRNA_01534|Chr02:54146726_54146895_+	CsTGY02G0001148.t1	exonic
circRNA_01535|Chr02:54216318_54216981_+	CsTGY02G0001152.t1	antisense
circRNA_01536|Chr02:54218101_54218490_-	CsTGY02G0001152.t1	exonic
circRNA_01537|Chr02:54218972_54219356_-	CsTGY02G0001152.t1	exonic
circRNA_01538|Chr02:54221587_54225467_-	CsTGY02G0001152.t1	exonic
circRNA_01539|Chr02:54223489_54223859_-	CsTGY02G0001152.t1	exonic
circRNA_01540|Chr02:54223489_54223924_-	CsTGY02G0001152.t1	exonic
circRNA_01541|Chr02:54271474_54271636_-	CsTGY02G0001153.t1	exonic
circRNA_01542|Chr02:54271539_54271735_+	CsTGY02G0001153.t1	antisense
circRNA_01543|Chr02:54271720_54271931_-	CsTGY02G0001153.t1	exonic
circRNA_01544|Chr02:54271818_54271981_-	CsTGY02G0001153.t1	exonic
circRNA_01545|Chr02:54328473_54328885_+	CsTGY02G0001154.t1	exonic
circRNA_01546|Chr02:54328740_54328919_-	CsTGY02G0001154.t1	antisense
circRNA_01547|Chr02:54328778_54329067_+	CsTGY02G0001154.t1	exonic
circRNA_01548|Chr02:54328863_54329020_-	CsTGY02G0001154.t1	antisense
circRNA_01549|Chr02:54499554_54500682_-	CsTGY02G0001158.t1	exonic
circRNA_01550|Chr02:54674116_54690349_-	CsTGY02G0001164.t1	sense-overlapping
circRNA_01551|Chr02:54767443_54767680_+	CsTGY02G0001168.t1	exonic
circRNA_01552|Chr02:54767816_54768013_+	CsTGY02G0001168.t1	exonic
circRNA_01553|Chr02:54769181_54769341_+	CsTGY02G0001169.t1	antisense
circRNA_01554|Chr02:54798897_54799091_-		intergenic
circRNA_01555|Chr02:54807813_54807981_-	CsTGY02G0001170.t1	exonic
circRNA_01556|Chr02:54809242_54809373_-	CsTGY02G0001170.t1	exonic
circRNA_01557|Chr02:54813492_54814263_-	CsTGY02G0001170.t1	exonic
circRNA_01558|Chr02:54830768_54830931_-	CsTGY02G0001171.t1	antisense
circRNA_01559|Chr02:54831047_54831234_+	CsTGY02G0001171.t1	exonic
circRNA_01560|Chr02:55522225_55522458_+	CsTGY02G0001176.t1	exonic
circRNA_01561|Chr02:55529820_55530099_-	CsTGY02G0001177.t1	exonic
circRNA_01562|Chr02:55544855_55545044_-	CsTGY02G0001178.t1	exonic
circRNA_01563|Chr02:55544908_55545075_-	CsTGY02G0001178.t1	exonic
circRNA_01564|Chr02:55586366_55598534_+	CsTGY02G0001180.t1	sense-overlapping
circRNA_01565|Chr02:55586602_55586779_+	CsTGY02G0001180.t1	sense-overlapping
circRNA_01566|Chr02:55843236_55843643_+	CsTGY02G0001186.t1	exonic
circRNA_01567|Chr02:56028317_56033745_+	CsTGY02G0001192.t1	exonic
circRNA_01568|Chr02:56186114_56195646_+	CsTGY02G0001193.t1	exonic
circRNA_01569|Chr02:56193312_56195646_+	CsTGY02G0001193.t1	exonic
circRNA_01570|Chr02:56196417_56197952_+	CsTGY02G0001193.t1	exonic
circRNA_01571|Chr02:56197323_56197952_+	CsTGY02G0001193.t1	exonic
circRNA_01572|Chr02:56253152_56253734_-	CsTGY02G0001195.t1	exonic
circRNA_01573|Chr02:56257266_56257452_-	CsTGY02G0001195.t1	exonic
circRNA_01574|Chr02:56355144_56355304_-	CsTGY02G0001196.t1	antisense
circRNA_01575|Chr02:56355169_56355343_-	CsTGY02G0001196.t1	antisense
circRNA_01576|Chr02:56702679_56705014_-	CsTGY02G0001207.t1	exonic
circRNA_01577|Chr02:56714612_56714820_-	CsTGY02G0001207.t1	exonic
circRNA_01578|Chr02:56836460_56836658_-	CsTGY02G0001208.t1	exonic
circRNA_01579|Chr02:56923543_56923739_+		intergenic
circRNA_01580|Chr02:57239465_57244971_+	CsTGY02G0001217.t1	exonic
circRNA_01581|Chr02:57239620_57243518_+	CsTGY02G0001217.t1	exonic
circRNA_01582|Chr02:57244552_57244971_+	CsTGY02G0001217.t1	exonic
circRNA_01583|Chr02:57251584_57252207_+	CsTGY02G0001217.t1	exonic
circRNA_01584|Chr02:57259201_57259483_-	CsTGY02G0001218.t1	antisense
circRNA_01585|Chr02:57260726_57261393_+	CsTGY02G0001218.t1	exonic
circRNA_01586|Chr02:57268058_57268350_+	CsTGY02G0001218.t1	exonic
circRNA_01587|Chr02:57415253_57417656_-	CsTGY02G0001225.t1	sense-overlapping
circRNA_01588|Chr02:57426493_57426621_+	CsTGY02G0001226.t1	sense-overlapping
circRNA_01589|Chr02:57901527_57901705_-	CsTGY02G0001241.t2	exonic
circRNA_01590|Chr02:57902458_57902611_-	CsTGY02G0001241.t2	exonic
circRNA_01591|Chr02:57991283_57991470_-	CsTGY02G0001246.t1	antisense
circRNA_01592|Chr02:57998218_57998381_+	CsTGY02G0001246.t1	intronic
circRNA_01593|Chr02:58000919_58001175_-	CsTGY02G0001246.t1	antisense
circRNA_01594|Chr02:58005047_58005201_+		intergenic
circRNA_01595|Chr02:58110912_58111061_-	CsTGY02G0001250.t1	exonic
circRNA_01596|Chr02:58142325_58142540_-	CsTGY02G0001251.t1	intronic
circRNA_01597|Chr02:58573805_58574688_+	CsTGY02G0001259.t1	antisense
circRNA_01598|Chr02:58793007_58793343_+	CsTGY02G0001263.t1	exonic
circRNA_01599|Chr02:58793007_58794195_+	CsTGY02G0001263.t1	exonic
circRNA_01600|Chr02:58861463_58927812_+	CsTGY02G0001266.t2	sense-overlapping
circRNA_01601|Chr02:58864918_58932478_+	CsTGY02G0001267.t1	sense-overlapping
circRNA_01602|Chr02:58876039_58941406_+	CsTGY02G0001266.t2	sense-overlapping
circRNA_01603|Chr02:59043317_59043494_+	CsTGY02G0001270.t1	sense-overlapping
circRNA_01604|Chr02:59089852_59090230_+		intergenic
circRNA_01605|Chr02:59285148_59288937_+	CsTGY02G0001276.t1	exonic
circRNA_01606|Chr02:59487485_59488784_+		intergenic
circRNA_01607|Chr02:59748707_59749813_-	CsTGY02G0001288.t1	exonic
circRNA_01608|Chr02:59895500_59895649_+	CsTGY02G0001294.t1	exonic
circRNA_01609|Chr02:59899032_59899401_+	CsTGY02G0001294.t1	exonic
circRNA_01610|Chr02:59899055_59899401_+	CsTGY02G0001294.t1	exonic
circRNA_01611|Chr02:60429878_60432651_-		intergenic
circRNA_01612|Chr02:60893259_60893461_-		intergenic
circRNA_01613|Chr02:61118887_61119048_+	CsTGY02G0001322.t1	antisense
circRNA_01614|Chr02:61119576_61119741_-	CsTGY02G0001322.t1	intronic
circRNA_01615|Chr02:61555464_61583912_+	CsTGY02G0001329.t1	sense-overlapping
circRNA_01616|Chr02:61555464_61583923_+	CsTGY02G0001329.t1	sense-overlapping
circRNA_01617|Chr02:61558219_61585769_+	CsTGY02G0001329.t1	sense-overlapping
circRNA_01618|Chr02:61616154_61616322_+		intergenic
circRNA_01619|Chr02:61717789_61718005_+	CsTGY02G0001334.t1	exonic
circRNA_01620|Chr02:61773937_61774169_+	CsTGY02G0001337.t2	exonic
circRNA_01621|Chr02:61839441_61931037_+	CsTGY02G0001341.t1	sense-overlapping
circRNA_01622|Chr02:61839694_61933045_+	CsTGY02G0001341.t1	sense-overlapping
circRNA_01623|Chr02:61845089_61934563_+	CsTGY02G0001341.t1	sense-overlapping
circRNA_01624|Chr02:61994289_61994512_-	CsTGY02G0001347.t1	exonic
circRNA_01625|Chr02:61997162_61997302_-	CsTGY02G0001347.t1	exonic
circRNA_01626|Chr02:62070386_62071658_+	CsTGY02G0001348.t1	antisense
circRNA_01627|Chr02:62071608_62072681_-	CsTGY02G0001348.t1	exonic
circRNA_01628|Chr02:62579770_62579955_-	CsTGY02G0001358.t1	exonic
circRNA_01629|Chr02:62687893_62688042_-	CsTGY02G0001359.t1	antisense
circRNA_01630|Chr02:62690421_62708438_+	CsTGY02G0001360.t1	antisense
circRNA_01631|Chr02:62690874_62691289_+	CsTGY02G0001359.t1	exonic
circRNA_01632|Chr02:63168435_63168620_-	CsTGY02G0001369.t1	exonic
circRNA_01633|Chr02:63357663_63357835_+		intergenic
circRNA_01634|Chr02:64354313_64355316_-	CsTGY02G0001393.t1	exonic
circRNA_01635|Chr02:64416272_64416424_+	CsTGY02G0001395.t2	antisense
circRNA_01636|Chr02:64417204_64417367_+	CsTGY02G0001395.t2	antisense
circRNA_01637|Chr02:64448780_64449120_-		intergenic
circRNA_01638|Chr02:64449267_64449487_-		intergenic
circRNA_01639|Chr02:64456814_64457056_-	CsTGY02G0001396.t1	exonic
circRNA_01640|Chr02:64456814_64457065_-	CsTGY02G0001396.t1	sense-overlapping
circRNA_01641|Chr02:64515046_64580491_-	CsTGY02G0001398.t1	sense-overlapping
circRNA_01642|Chr02:64516137_64582623_+	CsTGY02G0001398.t1	antisense
circRNA_01643|Chr02:64750682_64802808_+	CsTGY02G0001406.t1	sense-overlapping
circRNA_01644|Chr02:64897321_64897566_-	CsTGY02G0001407.t1	antisense
circRNA_01645|Chr02:64903413_64903583_-	CsTGY02G0001408.t1	antisense
circRNA_01646|Chr02:64904795_64907315_-	CsTGY02G0001409.t1	exonic
circRNA_01647|Chr02:65275510_65275998_-	CsTGY02G0001414.t1	antisense
circRNA_01648|Chr02:65280559_65280799_+	CsTGY02G0001414.t1	exonic
circRNA_01649|Chr02:65280650_65280799_+	CsTGY02G0001414.t1	exonic
circRNA_01650|Chr02:65288615_65288966_-	CsTGY02G0001416.t1	exonic
circRNA_01651|Chr02:66273892_66274306_+	CsTGY02G0001448.t1	exonic
circRNA_01652|Chr02:66392211_66394330_+	CsTGY02G0001452.t1	exonic
circRNA_01653|Chr02:66933845_66937811_-		intergenic
circRNA_01654|Chr02:66934689_66937811_-		intergenic
circRNA_01655|Chr02:66934689_66938887_-		intergenic
circRNA_01656|Chr02:66937606_66938887_-		intergenic
circRNA_01657|Chr02:67207843_67208010_-	CsTGY02G0001472.t1	antisense
circRNA_01658|Chr02:67209528_67209680_+	CsTGY02G0001472.t1	exonic
circRNA_01659|Chr02:67211151_67211547_+	CsTGY02G0001472.t1	exonic
circRNA_01660|Chr02:67223813_67223973_+	CsTGY02G0001472.t2	exonic
circRNA_01661|Chr02:67363152_67363393_+	CsTGY02G0001476.t1	exonic
circRNA_01662|Chr02:67372254_67373547_-	CsTGY02G0001476.t1	antisense
circRNA_01663|Chr02:67662713_67667158_+	CsTGY02G0001477.t1	exonic
circRNA_01664|Chr02:68006831_68008247_+		intergenic
circRNA_01665|Chr02:68011581_68012465_+		intergenic
circRNA_01666|Chr02:68012326_68012684_+		intergenic
circRNA_01667|Chr02:68082759_68082929_-	CsTGY02G0001493.t1	antisense
circRNA_01668|Chr02:68213188_68213372_+	CsTGY02G0001495.t1	exonic
circRNA_01669|Chr02:68216237_68216406_+		intergenic
circRNA_01670|Chr02:68390652_68390873_-	CsTGY02G0001501.t1	exonic
circRNA_01671|Chr02:68453737_68454798_-	CsTGY02G0001502.t1	exonic
circRNA_01672|Chr02:68722077_68722364_+	CsTGY02G0001511.t1	exonic
circRNA_01673|Chr02:69058846_69060758_+	CsTGY02G0001518.t1	intronic
circRNA_01674|Chr02:69139850_69196626_-	CsTGY02G0001520.t1	sense-overlapping
circRNA_01675|Chr02:69140606_69197264_-	CsTGY02G0001520.t1	sense-overlapping
circRNA_01676|Chr02:69423516_69423724_+	CsTGY02G0001526.t1	exonic
circRNA_01677|Chr02:70511081_70511261_+	CsTGY02G0001532.t1	exonic
circRNA_01678|Chr02:70511081_70512793_+	CsTGY02G0001532.t1	exonic
circRNA_01679|Chr02:70515756_70516759_+	CsTGY02G0001532.t1	exonic
circRNA_01680|Chr02:71702773_71702954_+	CsTGY02G0001562.t1	antisense
circRNA_01681|Chr02:71807125_71807646_+	CsTGY02G0001565.t1	exonic
circRNA_01682|Chr02:71807134_71807646_+	CsTGY02G0001565.t1	exonic
circRNA_01683|Chr02:71894617_71895009_+	CsTGY02G0001569.t1	exonic
circRNA_01684|Chr02:72074199_72074632_-	CsTGY02G0001576.t1	exonic
circRNA_01685|Chr02:72074489_72074611_-	CsTGY02G0001576.t3	exonic
circRNA_01686|Chr02:72076416_72076600_-	CsTGY02G0001576.t3	exonic
circRNA_01687|Chr02:72290178_72291004_+	CsTGY02G0001579.t1	exonic
circRNA_01688|Chr02:72290178_72301886_+	CsTGY02G0001579.t1	exonic
circRNA_01689|Chr02:72304769_72305001_+		intergenic
circRNA_01690|Chr02:72329658_72331180_+	CsTGY02G0001580.t1	exonic
circRNA_01691|Chr02:72330975_72331180_+	CsTGY02G0001580.t1	exonic
circRNA_01692|Chr02:72345377_72345749_+	CsTGY02G0001581.t2	antisense
circRNA_01693|Chr02:72362222_72362426_-	CsTGY02G0001581.t2	exonic
circRNA_01694|Chr02:72366108_72366319_-	CsTGY02G0001581.t2	intronic
circRNA_01695|Chr02:72376274_72376444_+		intergenic
circRNA_01696|Chr02:72502073_72502473_+	CsTGY02G0001584.t1	exonic
circRNA_01697|Chr02:72783235_72783386_+	CsTGY02G0001588.t1	antisense
circRNA_01698|Chr02:73000225_73002060_-	CsTGY02G0001598.t1	exonic
circRNA_01699|Chr02:73110263_73118678_+	CsTGY02G0001599.t1	exonic
circRNA_01700|Chr02:73128206_73128355_-	CsTGY02G0001600.t2	exonic
circRNA_01701|Chr02:73201989_73202255_+	CsTGY02G0001602.t2	exonic
circRNA_01702|Chr02:73203850_73204053_-	CsTGY02G0001602.t2	antisense
circRNA_01703|Chr02:73632347_73632539_+	CsTGY02G0001611.t1	antisense
circRNA_01704|Chr02:73928258_73928506_-	CsTGY02G0001614.t1	sense-overlapping
circRNA_01705|Chr02:73932588_73934108_-	CsTGY02G0001615.t1	exonic
circRNA_01706|Chr02:73935868_73936178_-	CsTGY02G0001615.t1	intronic
circRNA_01707|Chr02:73937475_73937615_-	CsTGY02G0001615.t1	exonic
circRNA_01708|Chr02:73937901_73938695_+	CsTGY02G0001615.t1	antisense
circRNA_01709|Chr02:73937919_73938736_-	CsTGY02G0001615.t1	exonic
circRNA_01710|Chr02:74169651_74169811_+	CsTGY02G0001617.t1	intronic
circRNA_01711|Chr02:74324699_74327582_-	CsTGY02G0001619.t1	antisense
circRNA_01712|Chr02:74324732_74324854_+	CsTGY02G0001619.t1	exonic
circRNA_01713|Chr02:74324748_74324934_+	CsTGY02G0001619.t1	exonic
circRNA_01714|Chr02:74326408_74326648_-	CsTGY02G0001619.t1	antisense
circRNA_01715|Chr02:74326930_74327085_+	CsTGY02G0001619.t1	exonic
circRNA_01716|Chr02:74326992_74327167_-	CsTGY02G0001619.t1	antisense
circRNA_01717|Chr02:74326996_74327475_-	CsTGY02G0001619.t1	antisense
circRNA_01718|Chr02:74327407_74327623_+	CsTGY02G0001619.t1	exonic
circRNA_01719|Chr02:74327451_74327623_+	CsTGY02G0001619.t1	exonic
circRNA_01720|Chr02:74327454_74327639_-	CsTGY02G0001619.t1	antisense
circRNA_01721|Chr02:74354161_74355117_+	CsTGY02G0001620.t1	exonic
circRNA_01722|Chr02:74402190_74402317_-	CsTGY02G0001623.t1	exonic
circRNA_01723|Chr02:74402223_74402407_-	CsTGY02G0001623.t1	exonic
circRNA_01724|Chr02:74433962_74434225_-	CsTGY02G0001625.t1	exonic
circRNA_01725|Chr02:74434159_74434431_-	CsTGY02G0001625.t1	exonic
circRNA_01726|Chr02:74434234_74434431_-	CsTGY02G0001625.t1	exonic
circRNA_01727|Chr02:74434401_74434650_-	CsTGY02G0001625.t1	exonic
circRNA_01728|Chr02:74473669_74473828_-	CsTGY02G0001628.t1	sense-overlapping
circRNA_01729|Chr02:74633523_74633673_-	CsTGY02G0001632.t1	exonic
circRNA_01730|Chr02:74813789_74814022_-	CsTGY02G0001633.t1	antisense
circRNA_01731|Chr02:75705446_75708438_-	CsTGY02G0001647.t1	sense-overlapping
circRNA_01732|Chr02:75879990_75880183_+		intergenic
circRNA_01733|Chr02:76543717_76543927_+	CsTGY02G0001670.t1	exonic
circRNA_01734|Chr02:76544173_76544390_+	CsTGY02G0001670.t1	intronic
circRNA_01735|Chr02:76601691_76601927_-	CsTGY02G0001672.t1	antisense
circRNA_01736|Chr02:76602739_76602935_-	CsTGY02G0001672.t1	antisense
circRNA_01737|Chr02:76943504_76950746_+	CsTGY02G0001681.t1	antisense
circRNA_01738|Chr02:77035508_77035766_-	CsTGY02G0001684.t1	exonic
circRNA_01739|Chr02:77093780_77094096_-	CsTGY02G0001685.t1	exonic
circRNA_01740|Chr02:77297855_77297981_+	CsTGY02G0001687.t1	exonic
circRNA_01741|Chr02:77479755_77481477_-	CsTGY02G0001690.t1	exonic
circRNA_01742|Chr02:77479755_77486710_-	CsTGY02G0001690.t1	exonic
circRNA_01743|Chr02:77700063_77700239_+	CsTGY02G0001697.t1	exonic
circRNA_01744|Chr02:77746684_77746821_+	CsTGY02G0001698.t1	exonic
circRNA_01745|Chr02:77774686_77775792_-	CsTGY02G0001699.t2	exonic
circRNA_01746|Chr02:77779624_77779930_+	CsTGY02G0001699.t2	antisense
circRNA_01747|Chr02:77805614_77811010_-	CsTGY02G0001699.t1	exonic
circRNA_01748|Chr02:77808094_77808264_-	CsTGY02G0001699.t1	intronic
circRNA_01749|Chr02:77833836_77834006_-	CsTGY02G0001699.t1	intronic
circRNA_01750|Chr02:77849226_77849318_-	CsTGY02G0001699.t1	exonic
circRNA_01751|Chr02:78479988_78483398_+	CsTGY02G0001713.t1	exonic
circRNA_01752|Chr02:78501587_78505217_+	CsTGY02G0001715.t1	exonic
circRNA_01753|Chr02:78507948_78509701_+	CsTGY02G0001715.t1	exonic
circRNA_01754|Chr02:78701544_78702209_-	CsTGY02G0001719.t1	exonic
circRNA_01755|Chr02:78708461_78708604_+	CsTGY02G0001719.t1	antisense
circRNA_01756|Chr02:78833671_78834317_-	CsTGY02G0001722.t1	exonic
circRNA_01757|Chr02:80216110_80216244_-	CsTGY02G0001736.t1	antisense
circRNA_01758|Chr02:80349672_80349900_+	CsTGY02G0001739.t1	exonic
circRNA_01759|Chr02:80349672_80359023_+	CsTGY02G0001739.t1	exonic
circRNA_01760|Chr02:80359760_80361233_+	CsTGY02G0001739.t1	exonic
circRNA_01761|Chr02:80359760_80368188_+	CsTGY02G0001739.t1	exonic
circRNA_01762|Chr02:80359807_80361233_+	CsTGY02G0001739.t1	exonic
circRNA_01763|Chr02:80359807_80368188_+	CsTGY02G0001739.t1	exonic
circRNA_01764|Chr02:80391316_80392723_-	CsTGY02G0001741.t1	exonic
circRNA_01765|Chr02:80537792_80539855_+	CsTGY02G0001743.t1	exonic
circRNA_01766|Chr02:80572277_80583114_-	CsTGY02G0001747.t1	exonic
circRNA_01767|Chr02:81879908_81880097_-	CsTGY02G0001756.t1	antisense
circRNA_01768|Chr02:81888633_81888748_+	CsTGY02G0001756.t1	intronic
circRNA_01769|Chr02:82132528_82132799_+	CsTGY02G0001758.t1	exonic
circRNA_01770|Chr02:83001421_83001616_-		intergenic
circRNA_01771|Chr02:84015532_84023049_+	CsTGY02G0001785.t2	exonic
circRNA_01772|Chr02:84017639_84023049_+	CsTGY02G0001785.t2	exonic
circRNA_01773|Chr02:84678080_84706119_-		intergenic
circRNA_01774|Chr02:85013496_85014860_+	CsTGY02G0001791.t2	intronic
circRNA_01775|Chr02:85254827_85255009_+	CsTGY02G0001796.t1	antisense
circRNA_01776|Chr02:85338214_85338533_+	CsTGY02G0001797.t1	exonic
circRNA_01777|Chr02:85338214_85341481_+	CsTGY02G0001797.t1	exonic
circRNA_01778|Chr02:86423957_86424872_+		intergenic
circRNA_01779|Chr02:86456909_86457137_-	CsTGY02G0001808.t1	exonic
circRNA_01780|Chr02:86505471_86505631_-	CsTGY02G0001810.t1	exonic
circRNA_01781|Chr02:86509538_86510574_-	CsTGY02G0001810.t1	exonic
circRNA_01782|Chr02:87327753_87342377_+	CsTGY02G0001820.t1	exonic
circRNA_01783|Chr02:89321208_89321372_+	CsTGY02G0001840.t1	exonic
circRNA_01784|Chr02:89691132_89695162_+	CsTGY02G0001851.t1	exonic
circRNA_01785|Chr02:89695549_89700478_+	CsTGY02G0001851.t2	exonic
circRNA_01786|Chr02:89714958_89715590_-	CsTGY02G0001852.t1	intronic
circRNA_01787|Chr02:89938625_89938884_+	CsTGY02G0001855.t1	exonic
circRNA_01788|Chr02:90269586_90269756_-		intergenic
circRNA_01789|Chr02:90270102_90270438_-		intergenic
circRNA_01790|Chr02:90272932_90273257_+		intergenic
circRNA_01791|Chr02:90274665_90274923_+	CsTGY02G0001870.t1	sense-overlapping
circRNA_01792|Chr02:90274698_90274872_+		intergenic
circRNA_01793|Chr02:90274711_90274928_+		intergenic
circRNA_01794|Chr02:90274780_90274984_+		intergenic
circRNA_01795|Chr02:90275089_90275451_-		intergenic
circRNA_01796|Chr02:90275180_90275346_+		intergenic
circRNA_01797|Chr02:90275248_90275910_-		intergenic
circRNA_01798|Chr02:90275308_90275488_+		intergenic
circRNA_01799|Chr02:90275308_90275917_+		intergenic
circRNA_01800|Chr02:90275308_90276431_+	CsTGY02G0001871.t1	sense-overlapping
circRNA_01801|Chr02:90275340_90276150_+		intergenic
circRNA_01802|Chr02:90275370_90276688_+	CsTGY02G0001871.t1	sense-overlapping
circRNA_01803|Chr02:90275810_90276241_-		intergenic
circRNA_01804|Chr02:90275858_90276202_+		intergenic
circRNA_01805|Chr02:90275888_90276237_+		intergenic
circRNA_01806|Chr02:90275899_90276089_+		intergenic
circRNA_01807|Chr02:90275899_90276431_+	CsTGY02G0001871.t1	sense-overlapping
circRNA_01808|Chr02:90275902_90276127_-		intergenic
circRNA_01809|Chr02:90275916_90276150_+		intergenic
circRNA_01810|Chr02:90276114_90276688_+	CsTGY02G0001871.t1	sense-overlapping
circRNA_01811|Chr02:90276315_90276904_+	CsTGY02G0001871.t1	sense-overlapping
circRNA_01812|Chr02:90276380_90276730_+	CsTGY02G0001871.t1	exonic
circRNA_01813|Chr02:90276516_90276904_+	CsTGY02G0001871.t1	exonic
circRNA_01814|Chr02:90276617_90276737_-	CsTGY02G0001871.t1	antisense
circRNA_01815|Chr02:90276749_90277033_+	CsTGY02G0001871.t1	exonic
circRNA_01816|Chr02:90276798_90277190_-	CsTGY02G0001871.t1	antisense
circRNA_01817|Chr02:90277029_90277343_+	CsTGY02G0001871.t1	exonic
circRNA_01818|Chr02:90485341_90485560_+	CsTGY02G0001879.t1	exonic
circRNA_01819|Chr02:90485822_90486031_+	CsTGY02G0001879.t1	exonic
circRNA_01820|Chr02:90678740_90686811_+	CsTGY02G0001882.t3	exonic
circRNA_01821|Chr02:90681835_90683687_+	CsTGY02G0001882.t3	exonic
circRNA_01822|Chr02:90681899_90682063_+	CsTGY02G0001882.t1	intronic
circRNA_01823|Chr02:90686686_90687568_+	CsTGY02G0001882.t3	exonic
circRNA_01824|Chr02:90687448_90688066_+	CsTGY02G0001882.t2	exonic
circRNA_01825|Chr02:90793790_90794396_+	CsTGY02G0001883.t2	exonic
circRNA_01826|Chr02:91640863_91641012_-	CsTGY02G0001901.t1	exonic
circRNA_01827|Chr02:92030947_92031135_+		intergenic
circRNA_01828|Chr02:92550741_92558495_-	CsTGY02G0001913.t1	exonic
circRNA_01829|Chr02:92636887_92637211_-	CsTGY02G0001915.t1	exonic
circRNA_01830|Chr02:93061707_93061956_-	CsTGY02G0001924.t1	exonic
circRNA_01831|Chr02:94303674_94304454_+	CsTGY02G0001938.t1	exonic
circRNA_01832|Chr02:94303674_94305511_+	CsTGY02G0001938.t1	exonic
circRNA_01833|Chr02:94303674_94311532_+	CsTGY02G0001938.t1	exonic
circRNA_01834|Chr02:94306219_94306429_-	CsTGY02G0001938.t1	antisense
circRNA_01835|Chr02:94308759_94311532_+	CsTGY02G0001938.t1	exonic
circRNA_01836|Chr02:94319286_94322898_-	CsTGY02G0001939.t1	exonic
circRNA_01837|Chr02:94319286_94324024_-	CsTGY02G0001939.t1	exonic
circRNA_01838|Chr02:94319286_94324029_-	CsTGY02G0001939.t1	exonic
circRNA_01839|Chr02:94319286_94325174_-	CsTGY02G0001939.t1	exonic
circRNA_01840|Chr02:94319286_94326575_-	CsTGY02G0001939.t1	exonic
circRNA_01841|Chr02:94320842_94322043_-	CsTGY02G0001939.t1	exonic
circRNA_01842|Chr02:94320842_94322898_-	CsTGY02G0001939.t1	exonic
circRNA_01843|Chr02:94321972_94322898_-	CsTGY02G0001939.t1	exonic
circRNA_01844|Chr02:94347399_94348305_-	CsTGY02G0001939.t1	exonic
circRNA_01845|Chr02:94417799_94420912_+	CsTGY02G0001940.t1	exonic
circRNA_01846|Chr02:94470302_94470483_-	CsTGY02G0001941.t1	antisense
circRNA_01847|Chr02:99565546_99565656_+	CsTGY02G0001990.t1	exonic
circRNA_01848|Chr02:99685144_99686759_-	CsTGY02G0001992.t1	exonic
circRNA_01849|Chr02:99687878_99690437_+	CsTGY02G0001992.t1	antisense
circRNA_01850|Chr02:100068432_100068990_+		intergenic
circRNA_01851|Chr02:100654814_100654999_-		intergenic
circRNA_01852|Chr02:100655092_100655275_-		intergenic
circRNA_01853|Chr02:101868524_101868733_+	CsTGY02G0002008.t1	antisense
circRNA_01854|Chr02:101870421_101870519_-	CsTGY02G0002008.t1	exonic
circRNA_01855|Chr02:101870919_101871071_-	CsTGY02G0002008.t1	exonic
circRNA_01856|Chr02:101872170_101872396_-	CsTGY02G0002008.t1	intronic
circRNA_01857|Chr02:102604147_102604378_+	CsTGY02G0002015.t1	exonic
circRNA_01858|Chr02:102768474_102768644_-	CsTGY02G0002018.t1	antisense
circRNA_01859|Chr02:103140052_103140222_+	CsTGY02G0002024.t1	exonic
circRNA_01860|Chr02:104940626_104940796_-	CsTGY02G0002051.t1	exonic
circRNA_01861|Chr02:105060573_105061694_+		intergenic
circRNA_01862|Chr02:105060573_105086442_+	CsTGY02G0002052.t1	sense-overlapping
circRNA_01863|Chr02:105079017_105080912_+	CsTGY02G0002052.t1	exonic
circRNA_01864|Chr02:105079020_105080912_+	CsTGY02G0002052.t1	exonic
circRNA_01865|Chr02:105081637_105081742_+	CsTGY02G0002052.t1	exonic
circRNA_01866|Chr02:105658860_105660187_+	CsTGY02G0002063.t1	antisense
circRNA_01867|Chr02:105998910_105999128_+	CsTGY02G0002067.t2	exonic
circRNA_01868|Chr02:106739928_106740406_-	CsTGY02G0002073.t2	exonic
circRNA_01869|Chr02:106745710_106745938_-	CsTGY02G0002073.t1	exonic
circRNA_01870|Chr02:107243021_107243175_-	CsTGY02G0002079.t1	exonic
circRNA_01871|Chr02:107736215_107736369_+	CsTGY02G0002087.t1	exonic
circRNA_01872|Chr02:107737679_107737898_+	CsTGY02G0002087.t1	exonic
circRNA_01873|Chr02:107748381_107748526_-	CsTGY02G0002089.t1	exonic
circRNA_01874|Chr02:107748381_107748530_-	CsTGY02G0002089.t1	exonic
circRNA_01875|Chr02:107753127_107753529_-	CsTGY02G0002089.t1	exonic
circRNA_01876|Chr02:107753167_107753324_-	CsTGY02G0002089.t1	exonic
circRNA_01877|Chr02:107755104_107755511_-	CsTGY02G0002089.t1	exonic
circRNA_01878|Chr02:107755599_107756771_+	CsTGY02G0002089.t1	antisense
circRNA_01879|Chr02:108015744_108015955_+	CsTGY02G0002095.t1	antisense
circRNA_01880|Chr02:108124284_108124440_-	CsTGY02G0002097.t1	antisense
circRNA_01881|Chr02:108157423_108158801_-		intergenic
circRNA_01882|Chr02:108193102_108223319_+	CsTGY02G0002101.t1	sense-overlapping
circRNA_01883|Chr02:108241445_108241630_-	CsTGY02G0002102.t1	exonic
circRNA_01884|Chr02:109010736_109014760_-	CsTGY02G0002109.t1	exonic
circRNA_01885|Chr02:109017696_109024487_-	CsTGY02G0002109.t1	exonic
circRNA_01886|Chr02:109023613_109024487_-	CsTGY02G0002109.t1	exonic
circRNA_01887|Chr02:109213904_109214091_+	CsTGY02G0002112.t1	exonic
circRNA_01888|Chr02:109213904_109214116_+	CsTGY02G0002112.t1	exonic
circRNA_01889|Chr02:109250786_109250949_+	CsTGY02G0002113.t1	exonic
circRNA_01890|Chr02:109687067_109687672_-	CsTGY02G0002115.t1	exonic
circRNA_01891|Chr02:109687067_109693208_-	CsTGY02G0002115.t1	exonic
circRNA_01892|Chr02:109962889_110017021_+	CsTGY02G0002119.t1	sense-overlapping
circRNA_01893|Chr02:110301245_110301749_+	CsTGY02G0002123.t1	exonic
circRNA_01894|Chr02:110301555_110303719_+	CsTGY02G0002123.t1	exonic
circRNA_01895|Chr02:110304591_110305013_+	CsTGY02G0002123.t1	exonic
circRNA_01896|Chr02:110333113_110333205_+	CsTGY02G0002124.t1	exonic
circRNA_01897|Chr02:110677925_110699485_-	CsTGY02G0002131.t1	sense-overlapping
circRNA_01898|Chr02:110992267_110992568_+	CsTGY02G0002135.t1	intronic
circRNA_01899|Chr02:116024861_116025018_+	CsTGY02G0002181.t1	antisense
circRNA_01900|Chr02:119057520_119057712_-	CsTGY02G0002205.t1	intronic
circRNA_01901|Chr02:119133395_119134887_+		intergenic
circRNA_01902|Chr02:119289416_119291150_-	CsTGY02G0002208.t1	exonic
circRNA_01903|Chr02:119391458_119392520_+	CsTGY02G0002210.t1	exonic
circRNA_01904|Chr02:119537036_119538828_+	CsTGY02G0002211.t1	exonic
circRNA_01905|Chr02:119848372_119848849_-	CsTGY02G0002213.t1	exonic
circRNA_01906|Chr02:120955981_120956133_-	CsTGY02G0002229.t1	intronic
circRNA_01907|Chr02:120973949_120974535_-	CsTGY02G0002229.t1	exonic
circRNA_01908|Chr02:121114216_121114669_-	CsTGY02G0002231.t1	exonic
circRNA_01909|Chr02:121114478_121114657_-	CsTGY02G0002231.t1	exonic
circRNA_01910|Chr02:121116356_121116501_-	CsTGY02G0002231.t2	exonic
circRNA_01911|Chr02:121116356_121116752_-	CsTGY02G0002231.t2	exonic
circRNA_01912|Chr02:121116404_121116516_+	CsTGY02G0002231.t2	antisense
circRNA_01913|Chr02:121426094_121426270_+	CsTGY02G0002237.t1	intronic
circRNA_01914|Chr02:121745699_121745866_+	CsTGY02G0002240.t1	exonic
circRNA_01915|Chr02:121747238_121747465_+	CsTGY02G0002240.t1	exonic
circRNA_01916|Chr02:121755980_121756136_-	CsTGY02G0002240.t1	antisense
circRNA_01917|Chr02:122003372_122003612_-	CsTGY02G0002243.t1	exonic
circRNA_01918|Chr02:122003557_122005707_-	CsTGY02G0002243.t1	exonic
circRNA_01919|Chr02:122424284_122424615_-		intergenic
circRNA_01920|Chr02:122504683_122506013_-	CsTGY02G0002246.t1	exonic
circRNA_01921|Chr02:122596778_122609886_-	CsTGY02G0002247.t1	exonic
circRNA_01922|Chr02:122600016_122609886_-	CsTGY02G0002247.t1	exonic
circRNA_01923|Chr02:122609712_122609878_-	CsTGY02G0002247.t1	exonic
circRNA_01924|Chr02:122609712_122611547_-	CsTGY02G0002247.t1	exonic
circRNA_01925|Chr02:122611214_122611547_-	CsTGY02G0002247.t1	intronic
circRNA_01926|Chr02:122732063_122733838_+	CsTGY02G0002251.t1	exonic
circRNA_01927|Chr02:127567986_127569827_-	CsTGY02G0002286.t1	exonic
circRNA_01928|Chr02:127579660_127579856_-	CsTGY02G0002286.t1	intronic
circRNA_01929|Chr02:132668380_132684729_+	CsTGY02G0002301.t1	exonic
circRNA_01930|Chr02:132677874_132724882_+	CsTGY02G0002302.t1	sense-overlapping
circRNA_01931|Chr02:132683983_132684729_+	CsTGY02G0002301.t1	exonic
circRNA_01932|Chr02:132716119_132724882_+	CsTGY02G0002302.t1	exonic
circRNA_01933|Chr02:132722206_132724882_+	CsTGY02G0002302.t1	exonic
circRNA_01934|Chr02:134589458_134590064_-	CsTGY02G0002311.t1	exonic
circRNA_01935|Chr02:134604047_134604706_-	CsTGY02G0002311.t1	exonic
circRNA_01936|Chr02:134605017_134606997_-	CsTGY02G0002311.t1	exonic
circRNA_01937|Chr02:135079190_135098511_+	CsTGY02G0002319.t1	sense-overlapping
circRNA_01938|Chr02:135110560_135110723_-	CsTGY02G0002320.t1	antisense
circRNA_01939|Chr02:135113171_135113359_-	CsTGY02G0002320.t1	antisense
circRNA_01940|Chr02:135307635_135308554_+	CsTGY02G0002322.t1	exonic
circRNA_01941|Chr02:135310998_135334895_+	CsTGY02G0002322.t1	exonic
circRNA_01942|Chr02:135310998_135346363_+	CsTGY02G0002322.t1	exonic
circRNA_01943|Chr02:135331425_135334895_+	CsTGY02G0002322.t1	exonic
circRNA_01944|Chr02:135331425_135346363_+	CsTGY02G0002322.t1	exonic
circRNA_01945|Chr02:135331425_135362144_+	CsTGY02G0002322.t1	exonic
circRNA_01946|Chr02:135332792_135332950_+	CsTGY02G0002322.t1	intronic
circRNA_01947|Chr02:135346112_135348883_+	CsTGY02G0002322.t1	exonic
circRNA_01948|Chr02:135361678_135362144_+	CsTGY02G0002322.t1	exonic
circRNA_01949|Chr02:135361678_135376060_+	CsTGY02G0002322.t1	exonic
circRNA_01950|Chr02:135375954_135398727_+	CsTGY02G0002322.t1	sense-overlapping
circRNA_01951|Chr02:137285064_137285443_+		intergenic
circRNA_01952|Chr02:137287124_137287301_+		intergenic
circRNA_01953|Chr02:138975328_138975512_+	CsTGY02G0002354.t1	exonic
circRNA_01954|Chr02:140612688_140635216_-		intergenic
circRNA_01955|Chr02:141435775_141443097_-	CsTGY02G0002382.t1	exonic
circRNA_01956|Chr02:141624802_141627687_-	CsTGY02G0002385.t1	exonic
circRNA_01957|Chr02:141627200_141627687_-	CsTGY02G0002385.t1	exonic
circRNA_01958|Chr02:141627200_141635078_-	CsTGY02G0002385.t1	exonic
circRNA_01959|Chr02:141634032_141634897_-	CsTGY02G0002385.t1	exonic
circRNA_01960|Chr02:141634777_141635078_-	CsTGY02G0002385.t1	exonic
circRNA_01961|Chr02:141673058_141673212_-	CsTGY02G0002385.t1	exonic
circRNA_01962|Chr02:141673118_141673320_+	CsTGY02G0002385.t1	antisense
circRNA_01963|Chr02:148286314_148286510_+		intergenic
circRNA_01964|Chr02:152973647_152978041_-	CsTGY02G0002442.t1	exonic
circRNA_01965|Chr02:153671846_153672809_+	CsTGY02G0002446.t1	exonic
circRNA_01966|Chr02:153684937_153685088_-	CsTGY02G0002446.t1	antisense
circRNA_01967|Chr02:154387935_154388546_-	CsTGY02G0002453.t1	antisense
circRNA_01968|Chr02:154388319_154388522_-	CsTGY02G0002453.t1	antisense
circRNA_01969|Chr02:154388689_154388800_+	CsTGY02G0002453.t1	exonic
circRNA_01970|Chr02:154388699_154388879_+	CsTGY02G0002453.t1	exonic
circRNA_01971|Chr02:154388801_154388961_+	CsTGY02G0002453.t1	exonic
circRNA_01972|Chr02:154388807_154388968_+	CsTGY02G0002453.t1	exonic
circRNA_01973|Chr02:154388909_154389073_+	CsTGY02G0002453.t1	exonic
circRNA_01974|Chr02:154883222_154883374_-	CsTGY02G0002456.t1	antisense
circRNA_01975|Chr02:154889640_154939739_-	CsTGY02G0002457.t1	antisense
circRNA_01976|Chr02:155785164_155786794_+	CsTGY02G0002463.t1	exonic
circRNA_01977|Chr02:156302532_156302617_+		intergenic
circRNA_01978|Chr02:156317380_156317718_+		intergenic
circRNA_01979|Chr02:156317380_156321976_+		intergenic
circRNA_01980|Chr02:156317380_156335709_+		intergenic
circRNA_01981|Chr02:156317380_156363586_+		intergenic
circRNA_01982|Chr02:156335584_156352315_+		intergenic
circRNA_01983|Chr02:156335584_156363586_+		intergenic
circRNA_01984|Chr02:156362088_156363586_+		intergenic
circRNA_01985|Chr02:156399857_156400183_+		intergenic
circRNA_01986|Chr02:156645241_156672840_+	CsTGY02G0002469.t1	exonic
circRNA_01987|Chr02:156660398_156660907_+	CsTGY02G0002469.t1	exonic
circRNA_01988|Chr02:159489338_159489893_+		intergenic
circRNA_01989|Chr02:161498980_161499145_-	CsTGY02G0002515.t1	antisense
circRNA_01990|Chr02:161514859_161515367_-	CsTGY02G0002516.t1	exonic
circRNA_01991|Chr02:161533407_161533576_+	CsTGY02G0002517.t1	antisense
circRNA_01992|Chr02:161590615_161590769_+	CsTGY02G0002518.t1	exonic
circRNA_01993|Chr02:161657598_161657763_-		intergenic
circRNA_01994|Chr02:163368323_163368567_+	CsTGY02G0002530.t1	exonic
circRNA_01995|Chr02:163754429_163754677_+		intergenic
circRNA_01996|Chr02:163754452_163754657_+		intergenic
circRNA_01997|Chr02:163965455_163965687_+		intergenic
circRNA_01998|Chr02:163965455_163965697_+		intergenic
circRNA_01999|Chr02:163965659_163966019_-		intergenic
[truncated: 9,403 more rows]
