# Supplementary material for: Genome-wide identification and characterization of circular RNAs for exogenous trehalose-mediated heat stress responses in tea plants (Camellia sinensis)
Source: Front Plant Sci. 2024 Dec 5;15:1481169. doi: 10.3389/fpls.2024.1481169 (PMC11655237; doi:10.3389/fpls.2024.1481169)
Supplement: Supplementary Table 4 — Differentially expressed circRNAs in the three pairwise comparisons of T vs. CK, TT vs. CK and TT vs. T. [file Table4.xls]

## Sheet: T-vs-CK
circRNA	case_value	control_value	FoldChange	log2FoldChange	z-score	pValue	qValue	Regulation	Expression_CK-1	Expression_CK-2	Expression_CK-3	Expression_T-1	Expression_T-2	Expression_T-3
circRNA_02477|Chr03:48573915_48587728_-	0	17770.2	2.94039e-05	-15.0536	-71.6611	0	0	Down	7559.74	10210.4	0	0	0	0
circRNA_02277|Chr03:15577784_15615891_-	0	4871.76	0.000107253	-13.1867	-45.4174	0	0	Down	1494.27	1951.43	1426.07	0	0	0
circRNA_02615|Chr03:89390209_89421500_-	0	2514.13	0.00020783	-12.2323	-35.707	3.07656e-279	9.363e-277	Down	990.282	806.693	717.154	0	0	0
circRNA_04527|Chr05:202756257_202767469_-	0	2336.27	0.000223652	-12.1265	-34.7545	1.18334e-264	2.70098e-262	Down	707.345	722.182	906.747	0	0	0
circRNA_02278|Chr03:15580070_15618163_-	0	1751.18	0.000298377	-11.7106	-31.2286	4.36577e-214	7.97189e-212	Down	875.339	875.838	0	0	0	0
circRNA_10269|Chr14:11241651_11299473_-	1405.96	0	2938.51	11.5209	29.0814	6.16547e-186	8.04154e-184	Up	0	0	0	826.897	579.06	0
circRNA_11206|Chr15:94995696_95049228_-	345.707	1487.45	0.24288	-2.04168	-26.8536	7.64778e-159	8.72803e-157	Down	663.136	0	824.315	0	345.707	0
circRNA_01526|Chr02:52364297_52459057_+	0	1162.08	0.000449634	-11.119	-26.7613	9.11119e-158	9.2428e-156	Down	433.249	291.946	436.887	0	0	0
circRNA_10268|Chr14:11240319_11299226_-	0	771.678	0.00067711	-10.5283	-22.8743	8.37972e-116	6.95516e-114	Down	318.305	0	453.373	0	0	0
circRNA_07166|Chr09:54891260_54891385_-	915.55	240.071	3.98536	1.99471	21.1989	9.78119e-100	7.44186e-98	Up	106.102	84.5107	49.4589	272.7	371.635	271.214
circRNA_03866|Chr04:227212197_227284926_-	0	607.827	0.000859638	-10.184	-20.8444	1.71367e-96	1.20352e-94	Down	238.729	138.29	230.808	0	0	0
circRNA_04693|Chr06:15295334_15295834_+	0	603.905	0.000865222	-10.1746	-20.7916	5.15711e-96	3.36317e-94	Down	238.729	192.07	173.106	0	0	0
circRNA_10971|Chr15:14747387_14797190_-	689.012	140.134	5.13819	2.36126	20.4208	1.09205e-92	6.64694e-91	Up	0	0	140.134	466.229	0	222.783
circRNA_01342|Chr02:27037032_27051453_-	529.508	0	1106.7	10.112	19.9955	6.02812e-89	3.4398e-87	Up	0	0	0	105.561	259.281	164.666
circRNA_04457|Chr05:179827165_179897965_+	0	530.675	0.000984617	-9.98815	-19.7614	6.40274e-87	3.43865e-85	Down	238.729	291.946	0	0	0	0
circRNA_09064|Chr12:51666035_51667724_+	0	513.545	0.00101746	-9.94081	-19.507	9.56508e-85	4.85162e-83	Down	274.096	107.559	131.89	0	0	0
circRNA_09570|Chr13:77317057_77392045_-	0	475.984	0.00109775	-9.83124	-18.9291	6.5652e-80	2.99702e-78	Down	212.203	0	263.781	0	0	0
circRNA_03906|Chr04:235405112_235471918_-	448.831	0	938.077	9.87356	18.7335	2.64134e-78	1.14835e-76	Up	0	0	0	255.106	0	193.724
circRNA_03241|Chr04:39490728_39496504_-	1528.09	724.804	2.2032	1.1396	18.1751	8.13193e-74	3.37475e-72	Up	159.153	268.898	296.754	413.448	475.348	639.291
circRNA_10965|Chr15:14587628_14675489_+	502.144	107.559	4.87873	2.28651	17.0976	1.54767e-65	5.8876e-64	Up	0	107.559	0	202.326	164.211	135.607
circRNA_00964|Chr01:245326024_245326785_-	393.025	58.4156	7.031	2.81373	16.985	1.06098e-64	3.8747e-63	Up	35.3672	23.0484	0	131.952	164.211	96.8622
circRNA_07196|Chr09:55293251_55294053_+	377.056	57.7021	6.82874	2.77162	16.5072	3.25655e-61	1.14355e-59	Up	0	0	57.7021	87.9677	172.854	116.235
circRNA_10483|Chr14:59248020_59336090_-	808.042	313.537	2.69321	1.42933	15.741	7.92054e-56	2.67832e-54	Up	106.102	207.435	0	413.448	181.496	213.097
circRNA_02273|Chr03:15534440_15535125_-	288.045	0	602.027	9.23368	15.6805	2.05609e-55	6.70432e-54	Up	0	0	0	0	181.496	106.548
circRNA_05723|Chr07:89305334_89361615_-	279.956	0	585.121	9.19259	15.4999	3.47198e-54	1.09308e-52	Up	0	0	0	193.529	86.4268	0
circRNA_04187|Chr05:44523917_44527822_-	1164.8	572.513	2.12614	1.08824	15.2785	1.06424e-52	3.23883e-51	Up	123.785	176.704	272.024	448.635	406.206	309.959
circRNA_11207|Chr15:94995840_95050528_-	435.054	104.306	4.35874	2.12391	15.2044	3.30718e-52	9.74018e-51	Up	79.5763	0	24.7295	140.748	129.64	164.666
circRNA_04982|Chr06:67004831_67034751_+	641.757	222.91	3.00862	1.5891	15.1651	6.02072e-52	1.71779e-50	Up	79.5763	69.1451	74.1884	175.935	233.352	232.469
circRNA_08420|Chr11:49135580_49174793_-	17.2854	242.481	0.0744949	-3.74671	-14.7802	1.96554e-49	5.27806e-48	Down	53.0508	115.242	74.1884	0	17.2854	0
circRNA_08871|Chr11:129899512_129983593_+	278.415	767.202	0.379235	-1.39883	-14.76	2.65311e-49	6.92081e-48	Down	265.254	238.166	263.781	105.561	172.854	0
circRNA_04114|Chr05:24747174_24747401_-	139.362	516.684	0.281867	-1.82691	-14.6807	8.57273e-49	2.17414e-47	Down	167.994	192.07	156.62	61.5774	77.7842	0
circRNA_09516|Chr13:72339021_72359386_-	0	250.494	0.00208592	-8.9051	-14.6035	2.66732e-48	6.58179e-47	Down	0	69.1451	181.349	0	0	0
circRNA_05650|Chr07:82198362_82226045_-	0	247.754	0.00210899	-8.88923	-14.5375	7.01546e-48	1.68556e-46	Down	106.102	92.1935	49.4589	0	0	0
circRNA_08992|Chr12:11272140_11322653_+	362.993	887.37	0.427483	-1.22606	-14.3403	1.22491e-46	2.86755e-45	Down	0	491.698	395.671	0	362.993	0
circRNA_03154|Chr04:26007908_26022281_+	146.926	512.262	0.29973	-1.73826	-14.1239	2.70425e-45	6.17245e-44	Down	274.096	238.166	0	0	146.926	0
circRNA_08374|Chr11:30433782_30503529_-	636	245.849	2.70342	1.43479	14.001	1.53773e-44	3.42427e-43	Up	0	245.849	0	0	267.923	368.077
circRNA_02445|Chr03:44627628_44718910_+	0	224.629	0.00232611	-8.74787	-13.9601	2.7324e-44	5.80157e-43	Down	88.4181	53.7795	82.4315	0	0	0
circRNA_01602|Chr02:58876039_58941406_+	0	223.662	0.00233617	-8.74164	-13.9351	3.87848e-44	8.04784e-43	Down	123.785	99.8763	0	0	0	0
circRNA_05651|Chr07:82535068_82566247_+	214.918	0	449.189	8.81118	13.9066	5.77723e-44	1.17214e-42	Up	0	0	0	70.3742	86.4268	58.1173
circRNA_01458|Chr02:41917206_41951432_+	209.406	0	437.669	8.7737	13.7578	4.57446e-43	8.88612e-42	Up	0	0	0	70.3742	51.8561	87.176
circRNA_03336|Chr04:83045989_83049063_-	307.298	773.917	0.414946	-1.269	-13.7555	4.71936e-43	8.97661e-42	Down	300.621	291.946	181.349	52.7806	138.283	116.235
circRNA_07228|Chr09:73473100_73568592_+	69.1415	341.567	0.211538	-2.24101	-13.6237	2.89445e-42	5.39313e-41	Down	0	176.704	164.863	0	69.1415	0
circRNA_05173|Chr06:103353295_103372666_+	203.705	0	425.753	8.73387	13.6011	3.94282e-42	7.19959e-41	Up	0	0	0	0	77.7842	125.921
circRNA_09717|Chr13:102935735_102936180_+	196.162	15.3656	13.3411	3.73781	13.578	5.40497e-42	9.67596e-41	Up	0	15.3656	0	105.561	51.8561	38.7449
circRNA_10368|Chr14:30876922_30958864_-	222.783	624.765	0.372642	-1.42414	-13.4978	1.61035e-41	2.82741e-40	Down	159.153	284.263	181.349	0	0	222.783
circRNA_03832|Chr04:220012977_220030240_+	197.976	0	413.779	8.69272	13.4408	3.48453e-41	6.0026e-40	Up	0	0	0	149.545	0	48.4311
circRNA_06600|Chr08:119641686_119694425_+	0	198.104	0.00263757	-8.56658	-13.2479	4.63817e-40	7.84194e-39	Down	61.8926	53.7795	82.4315	0	0	0
circRNA_04627|Chr06:5346435_5350291_+	381.538	106.792	3.73358	1.90056	13.2436	4.91269e-40	8.15507e-39	Up	44.209	46.0967	16.4863	105.561	120.998	154.98
circRNA_06538|Chr08:98861369_98861733_-	503.363	188.533	2.7901	1.48031	12.7469	3.24331e-37	5.28776e-36	Up	106.102	0	82.4315	255.106	190.139	58.1173
circRNA_04106|Chr05:24746746_24746973_+	196.898	552.503	0.372419	-1.425	-12.6975	6.10353e-37	9.77635e-36	Down	123.785	338.043	90.6747	87.9677	60.4988	48.4311
circRNA_05689|Chr07:83285453_83285680_-	443.326	154.608	2.99652	1.58329	12.5669	3.21241e-36	5.05677e-35	Up	53.0508	76.8279	24.7295	281.497	103.712	58.1173
circRNA_05974|Chr07:140196284_140196659_+	0	174.38	0.00299639	-8.38256	-12.5565	3.66314e-36	5.66856e-35	Down	35.3672	15.3656	123.647	0	0	0
circRNA_10487|Chr14:59483494_59486420_-	555.87	227.192	2.55686	1.35437	12.5277	5.26938e-36	8.01824e-35	Up	70.7345	115.242	41.2158	351.871	155.568	48.4311
circRNA_02836|Chr03:196358586_196412671_+	325.746	88.4181	3.85003	1.94487	12.4255	1.90101e-35	2.84529e-34	Up	88.4181	0	0	0	190.139	135.607
circRNA_07295|Chr09:82946267_82948499_+	163.917	0	342.593	8.42035	12.4195	2.04951e-35	3.01808e-34	Up	0	0	0	0	86.4268	77.4898
circRNA_03892|Chr04:231813613_231814428_+	804.028	403.253	2.08362	1.05909	12.4078	2.37015e-35	3.43484e-34	Up	106.102	107.559	189.593	158.342	267.923	377.763
circRNA_04340|Chr05:134405066_134439299_-	232.239	599.115	0.405089	-1.30369	-12.3551	4.56951e-35	6.4184e-34	Down	167.994	192.07	239.051	131.952	51.8561	48.4311
circRNA_09520|Chr13:72497964_72503831_+	482.926	183.505	2.75016	1.45952	12.3541	4.62753e-35	6.40141e-34	Up	17.6836	99.8763	65.9452	211.123	155.568	116.235
circRNA_03864|Chr04:227063727_227145118_+	300.273	703.477	0.446059	-1.16469	-12.2552	1.57619e-34	2.14785e-33	Down	406.723	0	296.754	0	0	300.273
circRNA_06402|Chr08:8027716_8029645_-	0	162.606	0.00321335	-8.28171	-12.1905	3.49373e-34	4.69084e-33	Down	88.4181	0	74.1884	0	0	0
circRNA_07560|Chr09:188706211_188708551_+	203.313	30.7312	6.91372	2.78946	12.1595	5.10872e-34	6.75979e-33	Up	0	30.7312	0	96.7645	0	106.548
circRNA_03337|Chr04:83045989_83050860_-	0	159.451	0.00327694	-8.25343	-12.0895	1.20041e-33	1.56568e-32	Down	44.209	115.242	0	0	0	0
circRNA_04140|Chr05:35274810_35316225_+	85.0889	330.186	0.269303	-1.8927	-12.0172	2.88514e-33	3.71004e-32	Down	106.102	92.1935	131.89	0	17.2854	67.8036
circRNA_07688|Chr10:6562089_6655034_+	0	156.404	0.00334078	-8.2256	-11.9907	3.97352e-33	4.96962e-32	Down	79.5763	76.8279	0	0	0	0
circRNA_11276|Chr15:113159856_113199806_-	146.975	0	307.184	8.26296	11.8594	1.92399e-32	2.37379e-31	Up	0	0	0	79.171	0	67.8036
circRNA_05163|Chr06:100069054_100070781_-	159.196	15.3656	10.827	3.43657	11.8486	2.18754e-32	2.66297e-31	Up	0	15.3656	0	87.9677	51.8561	19.3724
circRNA_08383|Chr11:35223410_35225042_-	146.085	0	305.325	8.2542	11.8288	2.76929e-32	3.32679e-31	Up	0	0	0	87.9677	0	58.1173
circRNA_04466|Chr05:187083115_187084073_+	0	150.249	0.00347763	-8.16768	-11.7874	4.53349e-32	5.37542e-31	Down	44.209	15.3656	90.6747	0	0	0
circRNA_07844|Chr10:39021151_39025275_-	235.313	49.4589	4.97196	2.31381	11.784	4.71811e-32	5.52261e-31	Up	0	0	49.4589	26.3903	34.5707	174.352
circRNA_05721|Chr07:88978789_88979057_-	279.899	73.7046	3.96856	1.98862	11.6872	1.48158e-31	1.71225e-30	Up	17.6836	23.0484	32.9726	87.9677	95.0695	96.8622
circRNA_02435|Chr03:39131063_39150320_-	34.5707	213.508	0.169208	-2.56313	-11.6484	2.33727e-31	2.66741e-30	Down	70.7345	76.8279	65.9452	0	34.5707	0
circRNA_01600|Chr02:58861463_58927812_+	0	145.244	0.00359747	-8.1188	-11.618	3.33729e-31	3.76167e-30	Down	53.0508	92.1935	0	0	0	0
circRNA_00494|Chr01:160068493_160129772_+	417.012	156.62	2.78245	1.47636	11.5774	5.36475e-31	5.97319e-30	Up	0	0	156.62	114.358	60.4988	242.156
circRNA_05364|Chr06:171918428_171924953_-	737.562	381.685	2.01938	1.01392	11.4652	1.97416e-30	2.17158e-29	Up	97.2599	169.021	115.404	158.342	337.065	242.156
circRNA_07439|Chr09:126465942_126477834_+	105.561	353.833	0.311769	-1.68145	-11.4645	1.98879e-30	2.16162e-29	Down	114.943	115.242	123.647	105.561	0	0
circRNA_07324|Chr09:90004267_90066173_+	26.3903	189.43	0.145587	-2.78005	-11.461	2.06994e-30	2.22336e-29	Down	0	115.242	74.1884	26.3903	0	0
circRNA_07118|Chr09:34594350_34679431_+	133.814	0	279.678	8.12762	11.3948	4.44102e-30	4.71471e-29	Up	0	0	0	0	95.0695	38.7449
circRNA_04311|Chr05:123959910_123967114_+	133.422	0	278.859	8.12339	11.3805	5.23218e-30	5.49078e-29	Up	0	0	0	96.7645	17.2854	19.3724
circRNA_02000|Chr02:164218339_164218890_+	132.049	0	275.989	8.10847	11.3302	9.29742e-30	9.53769e-29	Up	0	0	0	35.1871	0	96.8622
circRNA_09012|Chr12:23032494_23049392_+	0	135.766	0.00384863	-8.02144	-11.2867	1.52742e-29	1.54949e-28	Down	26.5254	84.5107	24.7295	0	0	0
circRNA_11126|Chr15:68776000_68777818_-	130.698	0	273.164	8.09362	11.2804	1.63962e-29	1.64503e-28	Up	0	0	0	17.5935	25.9281	87.176
circRNA_11352|Chr15:137921705_137923686_+	129.962	0	271.627	8.08548	11.2532	2.23368e-29	2.21669e-28	Up	0	0	0	35.1871	17.2854	77.4898
circRNA_00555|Chr01:180880586_180892815_+	194.229	35.3672	5.73904	2.52081	11.2521	2.26255e-29	2.2212e-28	Up	35.3672	0	0	114.358	60.4988	19.3724
circRNA_06011|Chr07:157080821_157081057_-	0	134.285	0.00389106	-8.00562	-11.2336	2.79009e-29	2.70995e-28	Down	35.3672	0	98.9178	0	0	0
circRNA_07775|Chr10:24053535_24057075_+	221.593	49.4589	4.68206	2.22714	11.1735	5.49984e-29	5.28563e-28	Up	0	0	49.4589	17.5935	155.568	48.4311
circRNA_00162|Chr01:23687032_23687568_-	126.986	0	265.406	8.05206	11.1419	7.83941e-29	7.45561e-28	Up	0	0	0	43.9839	34.5707	48.4311
circRNA_05877|Chr07:119514006_119514317_-	203.18	40.732	5.21281	2.38206	11.1399	8.02519e-29	7.55361e-28	Up	17.6836	23.0484	0	131.952	51.8561	19.3724
circRNA_10486|Chr14:59483494_59486415_-	510.941	228.313	2.33865	1.22568	11.1141	1.07073e-28	9.8745e-28	Up	70.7345	99.8763	57.7021	211.123	164.211	135.607
circRNA_00466|Chr01:150559806_150566838_+	0	130.961	0.00398982	-7.96946	-11.113	1.08498e-28	9.90587e-28	Down	44.209	53.7795	32.9726	0	0	0
circRNA_07138|Chr09:45195835_45247489_+	0	126.847	0.00411922	-7.92341	-10.9609	5.88871e-28	5.32316e-27	Down	0	69.1451	57.7021	0	0	0
circRNA_11187|Chr15:91061038_91063189_-	168.707	26.5254	6.64656	2.73261	10.9577	6.10229e-28	5.46215e-27	Up	26.5254	0	0	35.1871	17.2854	116.235
circRNA_00079|Chr01:13805709_13806137_-	121.922	0	254.823	7.99335	10.9487	6.7372e-28	5.97191e-27	Up	0	0	0	52.7806	69.1415	0
circRNA_04923|Chr06:63295790_63299845_-	121.614	0	254.179	7.9897	10.9368	7.68441e-28	6.74603e-27	Up	0	0	0	35.1871	86.4268	0
circRNA_05702|Chr07:84183901_84199060_-	0	125.673	0.00415771	-7.91	-10.917	9.56392e-28	8.31606e-27	Down	79.5763	46.0967	0	0	0	0
circRNA_03565|Chr04:163616475_163616634_+	0	125.243	0.00417199	-7.90505	-10.9008	1.14271e-27	9.84239e-27	Down	17.6836	107.559	0	0	0	0
circRNA_05893|Chr07:122370442_122421645_+	160.667	24.7295	6.7895	2.76331	10.7561	5.54927e-27	4.73503e-26	Up	0	0	24.7295	52.7806	69.1415	38.7449
circRNA_05405|Chr06:189907426_189912588_-	116.718	0	243.946	7.93042	10.7447	6.27423e-27	5.30405e-26	Up	0	0	0	70.3742	17.2854	29.0587
circRNA_01620|Chr02:61773937_61774169_+	116.529	0	243.551	7.92808	10.7372	6.80713e-27	5.70175e-26	Up	0	0	0	0	77.7842	38.7449
circRNA_06305|Chr07:251591067_251597801_+	115.058	0	240.477	7.90976	10.6784	1.28427e-26	1.06595e-25	Up	0	0	0	35.1871	60.4988	19.3724
circRNA_00261|Chr01:49821867_49822056_-	114.148	0	238.574	7.89829	10.6418	1.90442e-26	1.56643e-25	Up	0	0	0	0	17.2854	96.8622
circRNA_02915|Chr03:217828401_217829663_+	0	118.397	0.0044132	-7.82396	-10.6384	1.97458e-26	1.60963e-25	Down	44.209	0	74.1884	0	0	0
circRNA_01029|Chr01:256201658_256206337_-	112.677	0	235.5	7.87958	10.5822	3.60341e-26	2.91143e-25	Up	0	0	0	35.1871	0	77.4898
circRNA_09177|Chr12:117800758_117801847_-	134.739	15.3656	9.16369	3.19593	10.5688	4.15822e-26	3.33022e-25	Up	0	15.3656	0	52.7806	43.2134	38.7449
circRNA_05954|Chr07:137440318_137441562_+	0	116.601	0.00448118	-7.80191	-10.568	4.19479e-26	3.3303e-25	Down	17.6836	0	98.9178	0	0	0
circRNA_07019|Chr09:10246755_10250507_+	191.813	41.2158	4.8634	2.28197	10.5503	5.06423e-26	3.9859e-25	Up	0	0	41.2158	52.7806	51.8561	87.176
circRNA_00756|Chr01:211417610_211417834_-	0	112.042	0.00466353	-7.74436	-10.3859	2.87359e-25	2.22338e-24	Down	0	46.0967	65.9452	0	0	0
circRNA_11328|Chr15:126611060_126611222_-	107.886	0	225.487	7.8169	10.3846	2.91311e-25	2.23501e-24	Up	0	0	0	0	69.1415	38.7449
circRNA_02671|Chr03:117015945_117016630_-	107.305	0	224.273	7.80911	10.3603	3.75905e-25	2.86001e-24	Up	0	0	0	26.3903	51.8561	29.0587
circRNA_07829|Chr10:35682537_35707146_-	107.032	0	223.702	7.80543	10.3488	4.23783e-25	3.19764e-24	Up	0	0	0	70.3742	17.2854	19.3724
circRNA_09811|Chr13:117218862_117248477_+	526.118	256.412	2.14422	1.10045	10.3486	4.24542e-25	3.17711e-24	Up	256.412	0	0	167.139	155.568	203.411
circRNA_08487|Chr11:69836892_69838207_-	0	110.753	0.00471781	-7.72767	-10.3336	4.96606e-25	3.68619e-24	Down	53.0508	0	57.7021	0	0	0
circRNA_00566|Chr01:184757737_184769654_+	232.785	65.4614	3.71617	1.89382	10.3177	5.85882e-25	4.31379e-24	Up	17.6836	23.0484	24.7295	43.9839	120.998	67.8036
circRNA_00378|Chr01:119766387_119766705_-	105.799	0	221.125	7.78872	10.2968	7.28639e-25	5.32198e-24	Up	0	0	0	0	86.4268	19.3724
circRNA_02228|Chr03:11604573_11604861_-	105.253	0	219.984	7.78125	10.2736	9.26812e-25	6.71571e-24	Up	0	0	0	87.9677	17.2854	0
circRNA_05693|Chr07:83285506_83285733_-	104.945	0	219.34	7.77702	10.2605	1.06168e-24	7.60244e-24	Up	0	0	0	70.3742	34.5707	0
circRNA_08194|Chr10:186211310_186217273_-	104.945	0	219.34	7.77702	10.2605	1.06168e-24	7.60244e-24	Up	0	0	0	70.3742	34.5707	0
circRNA_05832|Chr07:110331488_110380079_-	0	107.314	0.00486899	-7.68216	-10.1921	2.1515e-24	1.52273e-23	Down	35.3672	30.7312	41.2158	0	0	0
circRNA_04740|Chr06:23067340_23073067_-	236.483	69.1451	3.57408	1.83757	10.1895	2.20951e-24	1.55176e-23	Up	0	69.1451	0	0	207.424	29.0587
circRNA_02902|Chr03:216662409_216698966_-	102.682	0	214.611	7.74558	10.1635	2.88597e-24	2.01137e-23	Up	0	0	0	17.5935	17.2854	67.8036
circRNA_01617|Chr02:61558219_61585769_+	101.793	0	212.752	7.73303	10.125	4.28148e-24	2.96136e-23	Up	0	0	0	26.3903	17.2854	58.1173
circRNA_07121|Chr09:34598859_34696019_+	402.648	175.247	2.40105	1.26367	10.1032	5.34618e-24	3.66997e-23	Up	106.102	69.1451	0	290.293	112.355	0
circRNA_09397|Chr12:168076017_168082595_-	83.31	276.521	0.314844	-1.66729	-10.0731	7.26439e-24	4.94954e-23	Down	132.627	61.4623	82.4315	17.5935	17.2854	48.4311
circRNA_07302|Chr09:83067320_83067667_+	0	103.784	0.00503462	-7.6339	-10.0437	9.79475e-24	6.62415e-23	Down	88.4181	15.3656	0	0	0	0
circRNA_09003|Chr12:20186841_20197490_+	0	103.238	0.00506121	-7.6263	-10.0205	1.23898e-23	8.25688e-23	Down	0	53.7795	49.4589	0	0	0
circRNA_04265|Chr05:103362509_103375713_+	0	103.108	0.00506759	-7.62448	-10.0149	1.31047e-23	8.66996e-23	Down	61.8926	0	41.2158	0	0	0
circRNA_06922|Chr09:1065121_1068522_+	0	102.51	0.00509719	-7.61608	-9.98935	1.69694e-23	1.11461e-22	Down	53.0508	0	49.4589	0	0	0
circRNA_03204|Chr04:36510956_36512495_-	98.2001	0	205.243	7.68119	9.96714	2.12257e-23	1.38422e-22	Up	0	0	0	0	69.1415	29.0587
circRNA_03243|Chr04:39495913_39496504_-	174.857	40.095	4.55741	2.18821	9.81741	9.47499e-23	6.04942e-22	Up	0	15.3656	24.7295	114.358	60.4988	0
circRNA_02744|Chr03:163242350_163246786_-	94.7752	0	198.084	7.62997	9.8132	9.87897e-23	6.26354e-22	Up	0	0	0	0	17.2854	77.4898
circRNA_05232|Chr06:121958997_121959155_+	123.701	16.4863	7.84108	2.97105	9.78818	1.26557e-22	7.96874e-22	Up	0	0	16.4863	35.1871	69.1415	19.3724
circRNA_08443|Chr11:53978569_53978812_-	0	97.7971	0.00534281	-7.54819	-9.78449	1.31259e-22	8.20821e-22	Down	0	15.3656	82.4315	0	0	0
circRNA_07980|Chr10:111226374_111228392_-	248.327	81.4257	3.18704	1.67222	9.77852	1.39233e-22	8.64762e-22	Up	26.5254	38.4139	16.4863	123.155	86.4268	38.7449
circRNA_10073|Chr13:139614390_139614846_-	93.7316	0	195.903	7.614	9.76558	1.582e-22	9.69372e-22	Up	0	0	0	0	25.9281	67.8036
circRNA_00430|Chr01:143729660_143730007_-	198.095	53.0508	3.90218	1.96428	9.75173	1.81349e-22	1.10381e-21	Up	53.0508	0	0	96.7645	43.2134	58.1173
circRNA_00545|Chr01:179590538_179591700_-	19.3724	136.771	0.148018	-2.75615	-9.69445	3.18333e-22	1.92476e-21	Down	0	46.0967	90.6747	0	0	19.3724
circRNA_03793|Chr04:216289443_216316643_+	166.347	406.453	0.427691	-1.22536	-9.69272	3.23804e-22	1.94495e-21	Down	106.102	176.704	123.647	79.171	0	87.176
circRNA_01838|Chr02:94319286_94324029_-	91.5255	0	191.293	7.57964	9.6638	4.29646e-22	2.56384e-21	Up	0	0	0	52.7806	0	38.7449
circRNA_02569|Chr03:74693690_74694166_+	124.009	17.6836	7.32839	2.8735	9.64021	5.4079e-22	3.20611e-21	Up	17.6836	0	0	52.7806	51.8561	19.3724
circRNA_08022|Chr10:131479870_131480025_+	0	94.5115	0.00552855	-7.49888	-9.63788	5.53174e-22	3.25837e-21	Down	17.6836	76.8279	0	0	0	0
circRNA_00118|Chr01:20457793_20459651_-	0	93.7828	0.00557151	-7.48772	-9.60493	7.62118e-22	4.46034e-21	Down	70.7345	23.0484	0	0	0	0
circRNA_04624|Chr06:4578999_4581031_-	0	93.7445	0.00557378	-7.48713	-9.60319	7.7507e-22	4.50725e-21	Down	61.8926	15.3656	16.4863	0	0	0
circRNA_11282|Chr15:113548416_113549261_+	89.7466	0	187.575	7.55132	9.58056	9.6516e-22	5.57716e-21	Up	0	0	0	70.3742	0	19.3724
circRNA_06774|Chr08:182763113_182763400_+	0	91.3882	0.00571749	-7.4504	-9.49546	2.19245e-21	1.25107e-20	Down	35.3672	23.0484	32.9726	0	0	0
circRNA_05634|Chr07:80433229_80457953_-	0	91.3499	0.00571989	-7.4498	-9.49369	2.22991e-21	1.26454e-20	Down	26.5254	15.3656	49.4589	0	0	0
circRNA_06481|Chr08:47908331_47930500_+	170.045	41.2158	4.31148	2.10818	9.45756	3.15216e-21	1.7656e-20	Up	0	0	41.2158	35.1871	86.4268	48.4311
circRNA_11069|Chr15:51443159_51443306_+	86.735	0	181.28	7.50208	9.43721	3.82832e-21	2.13125e-20	Up	0	0	0	17.5935	69.1415	0
circRNA_08490|Chr11:71054433_71054598_+	84.5077	0	176.625	7.46455	9.32912	1.06751e-20	5.87133e-20	Up	0	0	0	26.3903	0	58.1173
circRNA_10308|Chr14:19229396_19229598_+	115.829	16.4863	7.34208	2.87619	9.32112	1.15123e-20	6.29385e-20	Up	0	0	16.4863	79.171	17.2854	19.3724
circRNA_05918|Chr07:126045976_126081275_+	341.169	148.775	2.39644	1.26089	9.28295	1.64852e-20	8.95891e-20	Up	0	107.559	41.2158	131.952	112.355	96.8622
circRNA_02805|Chr03:186886622_186886824_-	19.3724	129.112	0.156799	-2.67301	-9.26747	1.90622e-20	1.02981e-19	Down	97.2599	15.3656	16.4863	0	0	19.3724
circRNA_05969|Chr07:139955329_139957732_+	0	86.1	0.00606866	-7.36441	-9.24703	2.30825e-20	1.23966e-19	Down	70.7345	15.3656	0	0	0	0
circRNA_00398|Chr01:134252361_134255801_+	81.9583	0	171.297	7.42035	9.20314	3.47632e-20	1.85607e-19	Up	0	0	0	0	43.2134	38.7449
circRNA_08134|Chr10:170999467_171005437_+	80.9499	0	169.189	7.40249	9.15261	5.55719e-20	2.94983e-19	Up	0	0	0	61.5774	0	19.3724
circRNA_03734|Chr04:205147373_205148850_+	80.9148	0	169.116	7.40187	9.15085	5.64873e-20	2.98109e-19	Up	0	0	0	0	51.8561	29.0587
circRNA_02405|Chr03:35707009_35711763_+	80.6417	0	168.545	7.39699	9.13709	6.41532e-20	3.3662e-19	Up	0	0	0	43.9839	17.2854	19.3724
circRNA_10524|Chr14:70268163_70270641_-	0	83.782	0.00623656	-7.32503	-9.13504	6.53798e-20	3.41096e-19	Down	53.0508	30.7312	0	0	0	0
circRNA_09114|Chr12:101764801_101766634_-	0	83.6288	0.00624798	-7.32239	-9.12758	7.00499e-20	3.61331e-19	Down	17.6836	0	65.9452	0	0	0
circRNA_06704|Chr08:164447014_164448247_+	329.836	145.015	2.37691	1.24909	9.06039	1.29991e-19	6.66751e-19	Up	0	46.0967	98.9178	114.358	60.4988	154.98
circRNA_07778|Chr10:24063371_24064106_+	78.7087	0	164.505	7.36199	9.03886	1.5831e-19	8.07471e-19	Up	0	0	0	52.7806	25.9281	0
circRNA_00646|Chr01:197070910_197096636_-	87.176	255.36	0.356755	-1.487	-8.90717	5.23496e-19	2.64062e-18	Down	88.4181	84.5107	82.4315	0	0	87.176
circRNA_05140|Chr06:95486141_95489715_-	0	79.0693	0.00660827	-7.24151	-8.90112	5.52882e-19	2.77352e-18	Down	0	46.0967	32.9726	0	0	0
circRNA_02332|Chr03:26832991_26833197_+	75.7109	0	158.239	7.30596	8.88342	6.48368e-19	3.22594e-18	Up	0	0	0	17.5935	0	58.1173
circRNA_09634|Chr13:87100887_87101097_-	75.7109	0	158.239	7.30596	8.88342	6.48368e-19	3.22594e-18	Up	0	0	0	17.5935	0	58.1173
circRNA_09603|Chr13:84487221_84489478_+	111.017	17.6836	6.56061	2.71383	8.85603	8.29132e-19	4.09188e-18	Up	17.6836	0	0	0	43.2134	67.8036
circRNA_03232|Chr04:39477461_39479632_-	447.255	233.117	2.00496	1.00358	8.84779	8.92721e-19	4.38201e-18	Up	53.0508	130.607	49.4589	105.561	138.283	203.411
circRNA_07897|Chr10:64302550_64303029_-	26.3903	137.523	0.200537	-2.31806	-8.82095	1.13493e-18	5.54112e-18	Down	44.209	76.8279	16.4863	26.3903	0	0
circRNA_03603|Chr04:180671255_180764036_+	0	77.1816	0.00676989	-7.20665	-8.80491	1.30954e-18	6.35962e-18	Down	44.209	0	32.9726	0	0	0
circRNA_05514|Chr07:70052127_70056361_+	0	76.583	0.00682281	-7.19542	-8.77409	1.72291e-18	8.32282e-18	Down	35.3672	0	41.2158	0	0	0
circRNA_07721|Chr10:11433750_11434804_-	73.6238	0	153.877	7.26564	8.77286	1.74189e-18	8.34826e-18	Up	0	0	0	17.5935	17.2854	38.7449
circRNA_09025|Chr12:35654533_35654703_-	73.6238	0	153.877	7.26564	8.77286	1.74189e-18	8.34826e-18	Up	0	0	0	17.5935	17.2854	38.7449
circRNA_01690|Chr02:72329658_72331180_+	73.3156	0	153.233	7.25958	8.75636	2.01652e-18	9.56406e-18	Up	0	0	0	0	34.5707	38.7449
circRNA_03260|Chr04:48224705_48237062_-	73.3156	0	153.233	7.25958	8.75636	2.01652e-18	9.56406e-18	Up	0	0	0	0	34.5707	38.7449
circRNA_04594|Chr06:980389_991111_-	72.7344	0	152.018	7.2481	8.72513	2.65874e-18	1.24804e-17	Up	0	0	0	26.3903	17.2854	29.0587
circRNA_06845|Chr08:206589204_206597991_+	72.7344	0	152.018	7.2481	8.72513	2.65874e-18	1.24804e-17	Up	0	0	0	26.3903	17.2854	29.0587
circRNA_05620|Chr07:80093489_80093646_+	72.5803	0	151.696	7.24504	8.71682	2.86113e-18	1.33276e-17	Up	0	0	0	17.5935	25.9281	29.0587
circRNA_02562|Chr03:68149426_68186173_-	71.5367	0	149.515	7.22415	8.66027	4.70631e-18	2.18115e-17	Up	0	0	0	17.5935	34.5707	19.3724
circRNA_07310|Chr09:86684408_86684981_+	71.2286	0	148.871	7.21792	8.64347	5.45295e-18	2.51442e-17	Up	0	0	0	0	51.8561	19.3724
circRNA_10820|Chr14:158710826_158721318_-	17.5935	113.8	0.161562	-2.62984	-8.62423	6.45261e-18	2.96042e-17	Down	17.6836	38.4139	57.7021	17.5935	0	0
circRNA_02163|Chr02:226714285_226800835_+	106.878	17.6836	6.31601	2.65901	8.59509	8.31964e-18	3.79792e-17	Up	17.6836	0	0	61.5774	25.9281	19.3724
circRNA_01092|Chr01:257437566_257437909_+	70.066	0	146.441	7.19418	8.57967	9.51438e-18	4.3217e-17	Up	0	0	0	52.7806	17.2854	0
circRNA_05557|Chr07:73713211_73713668_+	69.9119	0	146.119	7.191	8.57117	1.02443e-17	4.63022e-17	Up	0	0	0	43.9839	25.9281	0
circRNA_09963|Chr13:133370830_133377503_-	0	72.6222	0.00719493	-7.1188	-8.56618	1.06976e-17	4.8113e-17	Down	26.5254	46.0967	0	0	0	0
circRNA_01386|Chr02:33878416_33878598_+	69.7578	0	145.797	7.18782	8.56265	1.10306e-17	4.92466e-17	Up	0	0	0	35.1871	34.5707	0
circRNA_08421|Chr11:49207275_49207436_+	69.7578	0	145.797	7.18782	8.56265	1.10306e-17	4.92466e-17	Up	0	0	0	35.1871	34.5707	0
circRNA_07755|Chr10:16043393_16043809_+	69.4497	0	145.153	7.18143	8.54557	1.27901e-17	5.65488e-17	Up	0	0	0	17.5935	51.8561	0
circRNA_10813|Chr14:151827495_151858389_-	69.4497	0	145.153	7.18143	8.54557	1.27901e-17	5.65488e-17	Up	0	0	0	17.5935	51.8561	0
circRNA_00085|Chr01:14756436_14763002_-	0	71.9469	0.00726246	-7.10533	-8.53002	1.46327e-17	6.42289e-17	Down	0	30.7312	41.2158	0	0	0
circRNA_09943|Chr13:131959545_132023101_+	58.1173	194.818	0.311747	-1.68155	-8.50521	1.81263e-17	7.91835e-17	Down	79.5763	115.242	0	0	0	58.1173
circRNA_09018|Chr12:33405121_33408287_+	0	71.4631	0.00731162	-7.09559	-8.50397	1.83207e-17	7.96516e-17	Down	17.6836	53.7795	0	0	0	0
circRNA_04684|Chr06:13057811_13057994_-	17.5935	111.466	0.164943	-2.59996	-8.48217	2.21039e-17	9.56441e-17	Down	88.4181	23.0484	0	17.5935	0	0
circRNA_01570|Chr02:56196417_56197952_+	99.1247	15.3656	6.74153	2.75308	8.43162	3.40911e-17	1.46817e-16	Up	0	15.3656	0	52.7806	17.2854	29.0587
circRNA_00306|Chr01:73644140_73646279_+	0	69.5371	0.00751414	-7.05618	-8.39917	4.49645e-17	1.92284e-16	Down	53.0508	0	16.4863	0	0	0
circRNA_10640|Chr14:89791345_89793309_+	0	69.5371	0.00751414	-7.05618	-8.39917	4.49645e-17	1.92284e-16	Down	53.0508	0	16.4863	0	0	0
circRNA_03412|Chr04:116021374_116021536_+	79.171	229.026	0.361249	-1.46894	-8.35873	6.33946e-17	2.67959e-16	Down	106.102	122.925	0	79.171	0	0
circRNA_05167|Chr06:102018355_102021009_+	29.0587	135.037	0.224879	-2.15278	-8.35352	6.62563e-17	2.78765e-16	Down	79.5763	30.7312	24.7295	0	0	29.0587
circRNA_10070|Chr13:138920697_138923771_+	0	67.7412	0.00771335	-7.01843	-8.29976	1.04322e-16	4.36906e-16	Down	26.5254	0	41.2158	0	0	0
circRNA_07580|Chr09:192310864_192311587_-	64.6729	0	135.169	7.07863	8.27451	1.2899e-16	5.32887e-16	Up	0	0	0	0	25.9281	38.7449
circRNA_06225|Chr07:233704142_233704294_-	0	67.2574	0.00776883	-7.00809	-8.2727	1.30964e-16	5.38604e-16	Down	44.209	23.0484	0	0	0	0
circRNA_11369|Chr15:139137049_139171775_+	99.2437	16.4863	6.29079	2.65324	8.27266	1.31003e-16	5.3635e-16	Up	0	0	16.4863	0	60.4988	38.7449
circRNA_09079|Chr12:62826622_62846499_-	0	67.2191	0.00777326	-7.00726	-8.27055	1.33345e-16	5.43499e-16	Down	35.3672	15.3656	16.4863	0	0	0
circRNA_06581|Chr08:115696666_115706467_+	0	67.1425	0.00778212	-7.00562	-8.26625	1.38237e-16	5.60937e-16	Down	17.6836	0	49.4589	0	0	0
circRNA_01831|Chr02:94303674_94304454_+	64.2458	0	134.277	7.06906	8.24965	1.58861e-16	6.38942e-16	Up	0	0	0	35.1871	0	29.0587
circRNA_05447|Chr06:198593788_198596782_+	0	66.6205	0.00784311	-6.99436	-8.23687	1.76771e-16	7.07859e-16	Down	26.5254	15.3656	24.7295	0	0	0
circRNA_09519|Chr13:72497964_72503492_+	63.9376	0	133.633	7.06213	8.23165	1.84649e-16	7.36178e-16	Up	0	0	0	17.5935	17.2854	29.0587
circRNA_04783|Chr06:31305028_31306284_+	0	66.0984	0.00790506	-6.98301	-8.20735	2.2613e-16	8.97638e-16	Down	35.3672	30.7312	0	0	0	0
circRNA_00137|Chr01:21539683_21548557_-	63.3563	0	132.418	7.04895	8.19756	2.45326e-16	9.6962e-16	Up	0	0	0	43.9839	0	19.3724
circRNA_04616|Chr06:2881390_2881548_+	185.103	63.7803	3.03286	1.60068	8.18132	2.80753e-16	1.10486e-15	Up	17.6836	46.0967	0	43.9839	34.5707	106.548
circRNA_03488|Chr04:145636323_145637857_+	111.787	23.0484	5.06849	2.34156	8.17875	2.86799e-16	1.12381e-15	Up	0	23.0484	0	43.9839	0	67.8036
circRNA_02254|Chr03:13802321_13803851_-	62.894	0	131.451	7.03839	8.1703	3.07632e-16	1.19518e-15	Up	0	0	0	17.5935	25.9281	19.3724
circRNA_06883|Chr08:210933080_210935663_-	62.894	0	131.451	7.03839	8.1703	3.07632e-16	1.19518e-15	Up	0	0	0	17.5935	25.9281	19.3724
circRNA_11071|Chr15:51830341_51831577_-	62.894	0	131.451	7.03839	8.1703	3.07632e-16	1.19518e-15	Up	0	0	0	17.5935	25.9281	19.3724
circRNA_00127|Chr01:20817410_20817610_+	62.5859	0	130.807	7.0313	8.15205	3.57796e-16	1.37834e-15	Up	0	0	0	0	43.2134	19.3724
circRNA_10563|Chr14:79216138_79216305_+	0	64.9011	0.00805089	-6.95664	-8.13907	3.98332e-16	1.52806e-15	Down	17.6836	30.7312	16.4863	0	0	0
circRNA_07066|Chr09:18984313_18988156_-	365.612	187.935	2.03301	1.02362	8.12968	4.30418e-16	1.64423e-15	Up	97.2599	0	90.6747	149.545	216.067	0
circRNA_00375|Chr01:118467668_118467840_+	0	63.7803	0.00819236	-6.93151	-8.07443	6.77948e-16	2.57903e-15	Down	17.6836	46.0967	0	0	0	0
circRNA_03900|Chr04:234303464_234402058_-	61.2692	0	128.056	7.00063	8.07346	6.83334e-16	2.58337e-15	Up	0	0	0	43.9839	17.2854	0
circRNA_09009|Chr12:22592559_22592790_-	61.2692	0	128.056	7.00063	8.07346	6.83334e-16	2.58337e-15	Up	0	0	0	43.9839	17.2854	0
circRNA_06471|Chr08:45667466_45672011_+	0	63.7038	0.00820221	-6.92977	-8.06998	7.03081e-16	2.64162e-15	Down	0	30.7312	32.9726	0	0	0
circRNA_06492|Chr08:50106168_50106289_-	60.9611	0	127.411	6.99335	8.05491	7.95376e-16	2.95796e-15	Up	0	0	0	26.3903	34.5707	0
circRNA_07330|Chr09:92800972_92801331_-	60.9611	0	127.411	6.99335	8.05491	7.95376e-16	2.95796e-15	Up	0	0	0	26.3903	34.5707	0
circRNA_09245|Chr12:144099129_144103764_-	60.9611	0	127.411	6.99335	8.05491	7.95376e-16	2.95796e-15	Up	0	0	0	26.3903	34.5707	0
circRNA_10125|Chr13:156475295_156476781_-	60.9611	0	127.411	6.99335	8.05491	7.95376e-16	2.95796e-15	Up	0	0	0	26.3903	34.5707	0
circRNA_04100|Chr05:24746298_24746684_-	60.807	0	127.089	6.9897	8.04561	8.58156e-16	3.1529e-15	Up	0	0	0	17.5935	43.2134	0
circRNA_06576|Chr08:112532715_112532900_+	60.807	0	127.089	6.9897	8.04561	8.58156e-16	3.1529e-15	Up	0	0	0	17.5935	43.2134	0
circRNA_10266|Chr14:11032645_11045008_-	0	63.1434	0.008275	-6.91703	-8.03737	9.17906e-16	3.33884e-15	Down	0	38.4139	24.7295	0	0	0
circRNA_00396|Chr01:134240118_134252814_+	0	60.6953	0.00860876	-6.85998	-7.89267	2.95793e-15	1.07166e-14	Down	44.209	0	16.4863	0	0	0
circRNA_02689|Chr03:136105920_136111287_+	204.202	80.1901	2.66113	1.41204	7.83266	4.77667e-15	1.72375e-14	Up	0	30.7312	49.4589	87.9677	0	116.235
circRNA_06413|Chr08:11329355_11334341_-	0	59.5746	0.00877071	-6.83309	-7.82519	5.06907e-15	1.81849e-14	Down	44.209	15.3656	0	0	0	0
circRNA_09921|Chr13:129838836_129839242_-	0	59.5746	0.00877071	-6.83309	-7.82519	5.06907e-15	1.81849e-14	Down	44.209	15.3656	0	0	0	0
circRNA_08387|Chr11:38617059_38617873_-	0	59.498	0.008782	-6.83124	-7.82055	5.25949e-15	1.87575e-14	Down	26.5254	0	32.9726	0	0	0
circRNA_03081|Chr04:14611990_14612453_+	0	58.8994	0.00887126	-6.81665	-7.78414	7.01901e-15	2.49352e-14	Down	17.6836	0	41.2158	0	0	0
circRNA_08868|Chr11:128576432_128578312_+	19.3724	104.436	0.193848	-2.367	-7.78259	7.10527e-15	2.51439e-14	Down	17.6836	53.7795	32.9726	0	0	19.3724
circRNA_07064|Chr09:18983465_18987044_-	56.3384	0	117.75	6.87958	7.76918	7.89949e-15	2.77928e-14	Up	0	0	0	17.5935	0	38.7449
circRNA_07834|Chr10:37538710_37543544_+	56.3384	0	117.75	6.87958	7.76918	7.89949e-15	2.77928e-14	Up	0	0	0	17.5935	0	38.7449
circRNA_03728|Chr04:203087504_203088887_-	0	58.4156	0.00894473	-6.80475	-7.75454	8.86614e-15	3.10145e-14	Down	35.3672	23.0484	0	0	0	0
circRNA_10008|Chr13:137710876_137711066_-	0	58.3773	0.00895059	-6.8038	-7.7522	9.03174e-15	3.14732e-14	Down	26.5254	15.3656	16.4863	0	0	0
circRNA_05758|Chr07:96606038_96606162_-	56.0303	0	117.106	6.87167	7.74961	9.21748e-15	3.19376e-14	Up	0	0	0	0	17.2854	38.7449
circRNA_08240|Chr11:1889043_1898558_-	56.0303	0	117.106	6.87167	7.74961	9.21748e-15	3.19376e-14	Up	0	0	0	0	17.2854	38.7449
circRNA_05614|Chr07:79863323_79863897_-	0	57.7786	0.00904333	-6.78893	-7.71534	1.20657e-14	4.15699e-14	Down	17.6836	15.3656	24.7295	0	0	0
circRNA_02383|Chr03:31645949_31684608_+	55.449	0	115.891	6.85662	7.71251	1.23368e-14	4.21854e-14	Up	0	0	0	26.3903	0	29.0587
circRNA_06013|Chr07:158229485_158231979_+	55.449	0	115.891	6.85662	7.71251	1.23368e-14	4.21854e-14	Up	0	0	0	26.3903	0	29.0587
circRNA_10786|Chr14:139400914_139408012_-	55.449	0	115.891	6.85662	7.71251	1.23368e-14	4.21854e-14	Up	0	0	0	26.3903	0	29.0587
circRNA_01598|Chr02:58793007_58793343_+	0	57.2183	0.0091319	-6.77487	-7.68063	1.58312e-14	5.37318e-14	Down	17.6836	23.0484	16.4863	0	0	0
circRNA_02619|Chr03:90051865_90054075_-	54.5595	0	114.032	6.83329	7.65526	1.92929e-14	6.4878e-14	Up	0	0	0	35.1871	0	19.3724
circRNA_02741|Chr03:161383669_161384244_+	54.5595	0	114.032	6.83329	7.65526	1.92929e-14	6.4878e-14	Up	0	0	0	35.1871	0	19.3724
circRNA_03949|Chr05:10847270_10848530_+	54.5595	0	114.032	6.83329	7.65526	1.92929e-14	6.4878e-14	Up	0	0	0	35.1871	0	19.3724
circRNA_09868|Chr13:122450610_122450817_-	54.5595	0	114.032	6.83329	7.65526	1.92929e-14	6.4878e-14	Up	0	0	0	35.1871	0	19.3724
circRNA_04112|Chr05:24746946_24747173_-	0	56.5813	0.0092347	-6.75872	-7.6409	2.15702e-14	7.1613e-14	Down	0	15.3656	41.2158	0	0	0
circRNA_00927|Chr01:240672079_240672675_-	54.2514	0	113.388	6.82512	7.63528	2.2533e-14	7.45387e-14	Up	0	0	0	17.5935	17.2854	19.3724
circRNA_02545|Chr03:66535704_66541344_+	53.9432	0	112.744	6.8169	7.61523	2.63218e-14	8.64453e-14	Up	0	0	0	0	34.5707	19.3724
circRNA_02657|Chr03:108735488_108738713_+	53.9432	0	112.744	6.8169	7.61523	2.63218e-14	8.64453e-14	Up	0	0	0	0	34.5707	19.3724
circRNA_08350|Chr11:19346009_19347026_+	53.9432	0	112.744	6.8169	7.61523	2.63218e-14	8.64453e-14	Up	0	0	0	0	34.5707	19.3724
circRNA_05948|Chr07:137078354_137166298_-	145.006	46.0967	3.28733	1.71692	7.61158	2.70769e-14	8.79759e-14	Up	0	46.0967	0	26.3903	60.4988	58.1173
circRNA_01244|Chr02:12048613_12048768_+	0	56.0976	0.00931434	-6.74633	-7.61054	2.72948e-14	8.82129e-14	Down	17.6836	38.4139	0	0	0	0
circRNA_08888|Chr11:134288430_134289333_+	0	56.0976	0.00931434	-6.74633	-7.61054	2.72948e-14	8.82129e-14	Down	17.6836	38.4139	0	0	0	0
circRNA_10167|Chr13:166779361_166779626_-	0	56.021	0.00932707	-6.74436	-7.60572	2.83319e-14	9.09211e-14	Down	0	23.0484	32.9726	0	0	0
circRNA_10721|Chr14:127233399_127233585_+	0	56.021	0.00932707	-6.74436	-7.60572	2.83319e-14	9.09211e-14	Down	0	23.0484	32.9726	0	0	0
circRNA_08946|Chr12:7655146_7668377_+	89.4385	16.4863	5.66927	2.50316	7.60432	2.86417e-14	9.1433e-14	Up	0	0	16.4863	52.7806	17.2854	19.3724
circRNA_10473|Chr14:58112352_58113397_+	25.9281	115.634	0.234321	-2.09344	-7.59458	3.08785e-14	9.82302e-14	Down	53.0508	46.0967	16.4863	0	25.9281	0
circRNA_05649|Chr07:82186328_82186680_-	88.9762	16.4863	5.63996	2.49569	7.57179	3.68126e-14	1.16701e-13	Up	0	0	16.4863	26.3903	43.2134	19.3724
circRNA_07831|Chr10:35749362_35750397_-	0	55.4606	0.00942131	-6.72986	-7.57031	3.72322e-14	1.17623e-13	Down	0	30.7312	24.7295	0	0	0
circRNA_02113|Chr02:222043689_222044094_-	121.011	32.9726	3.8353	1.93934	7.55679	4.13138e-14	1.2962e-13	Up	0	0	32.9726	17.5935	25.9281	77.4898
circRNA_02840|Chr03:196462365_196462533_+	0	54.9002	0.00951747	-6.71521	-7.53468	4.89534e-14	1.52801e-13	Down	0	38.4139	16.4863	0	0	0
circRNA_05235|Chr06:124728840_124730635_-	0	54.9002	0.00951747	-6.71521	-7.53468	4.89534e-14	1.52801e-13	Down	0	38.4139	16.4863	0	0	0
circRNA_02553|Chr03:66840948_66841188_-	52.4725	0	109.67	6.77702	7.51854	5.53907e-14	1.69989e-13	Up	0	0	0	35.1871	17.2854	0
circRNA_05357|Chr06:170792948_170793142_+	52.4725	0	109.67	6.77702	7.51854	5.53907e-14	1.69989e-13	Up	0	0	0	35.1871	17.2854	0
circRNA_08173|Chr10:182344703_182346294_-	52.4725	0	109.67	6.77702	7.51854	5.53907e-14	1.69989e-13	Up	0	0	0	35.1871	17.2854	0
circRNA_08793|Chr11:119429213_119429506_-	52.4725	0	109.67	6.77702	7.51854	5.53907e-14	1.69989e-13	Up	0	0	0	35.1871	17.2854	0
circRNA_07380|Chr09:104635021_104635179_-	225.956	99.071	2.38344	1.25304	7.51627	5.6363e-14	1.71532e-13	Up	35.3672	30.7312	32.9726	87.9677	60.4988	77.4898
circRNA_00241|Chr01:40314864_40315092_+	52.1643	0	109.026	6.76853	7.49806	6.47676e-14	1.93878e-13	Up	0	0	0	17.5935	34.5707	0
circRNA_00942|Chr01:242884452_242884781_-	52.1643	0	109.026	6.76853	7.49806	6.47676e-14	1.93878e-13	Up	0	0	0	17.5935	34.5707	0
circRNA_01987|Chr02:156660398_156660907_+	52.1643	0	109.026	6.76853	7.49806	6.47676e-14	1.93878e-13	Up	0	0	0	17.5935	34.5707	0
circRNA_03547|Chr04:160340421_160358620_+	52.1643	0	109.026	6.76853	7.49806	6.47676e-14	1.93878e-13	Up	0	0	0	17.5935	34.5707	0
circRNA_04097|Chr05:24746262_24746489_-	52.1643	0	109.026	6.76853	7.49806	6.47676e-14	1.93878e-13	Up	0	0	0	17.5935	34.5707	0
circRNA_08155|Chr10:180253595_180278045_-	52.1643	0	109.026	6.76853	7.49806	6.47676e-14	1.93878e-13	Up	0	0	0	17.5935	34.5707	0
circRNA_08848|Chr11:124921302_124938742_-	52.1643	0	109.026	6.76853	7.49806	6.47676e-14	1.93878e-13	Up	0	0	0	17.5935	34.5707	0
circRNA_00607|Chr01:191904129_191921134_+	34.8789	131.483	0.277216	-1.85092	-7.46775	8.1577e-14	2.41035e-13	Down	35.3672	38.4139	57.7021	17.5935	17.2854	0
circRNA_08146|Chr10:176663010_176663190_+	87.0432	16.4863	5.51744	2.464	7.4347	1.04804e-13	3.07672e-13	Up	0	0	16.4863	35.1871	51.8561	0
circRNA_03004|Chr04:4836082_4841552_-	17.5935	94.5115	0.194534	-2.36191	-7.39409	1.42379e-13	4.13988e-13	Down	17.6836	76.8279	0	17.5935	0	0
circRNA_05284|Chr06:139997303_139997504_+	17.2854	93.7828	0.192611	-2.37624	-7.39183	1.44824e-13	4.1976e-13	Down	70.7345	23.0484	0	0	17.2854	0
circRNA_00783|Chr01:219108913_219119746_-	141.119	304.205	0.48478	-1.0446	-7.37478	1.64615e-13	4.75611e-13	Down	167.994	53.7795	82.4315	0	34.5707	106.548
circRNA_08376|Chr11:30433788_30503529_-	99.2437	23.0484	4.49975	2.16985	7.35674	1.88461e-13	5.4279e-13	Up	0	23.0484	0	0	60.4988	38.7449
circRNA_02588|Chr03:79581370_79586667_-	0	51.8535	0.0100767	-6.63284	-7.33678	2.18792e-13	6.25219e-13	Down	35.3672	0	16.4863	0	0	0
circRNA_04465|Chr05:187083115_187084054_+	0	51.8535	0.0100767	-6.63284	-7.33678	2.18792e-13	6.25219e-13	Down	35.3672	0	16.4863	0	0	0
circRNA_05411|Chr06:190322848_190333531_-	0	51.8535	0.0100767	-6.63284	-7.33678	2.18792e-13	6.25219e-13	Down	35.3672	0	16.4863	0	0	0
circRNA_11247|Chr15:110487912_110500748_-	0	51.8535	0.0100767	-6.63284	-7.33678	2.18792e-13	6.25219e-13	Down	35.3672	0	16.4863	0	0	0
circRNA_10262|Chr14:10379876_10381480_+	0	51.2549	0.0101944	-6.61608	-7.29703	2.94179e-13	8.31533e-13	Down	26.5254	0	24.7295	0	0	0
circRNA_07193|Chr09:55283721_55284376_+	112.677	30.7312	3.83161	1.93795	7.28837	3.13728e-13	8.84054e-13	Up	0	30.7312	0	35.1871	0	77.4898
circRNA_09396|Chr12:167411019_167448560_+	286.931	145.973	2.05415	1.03854	7.28692	3.17111e-13	8.90837e-13	Up	0	145.973	0	131.952	0	154.98
circRNA_03554|Chr04:161550971_161551152_+	0	50.7328	0.0102993	-6.60131	-7.26213	3.81036e-13	1.0574e-12	Down	35.3672	15.3656	0	0	0	0
circRNA_03972|Chr05:13356169_13356327_-	0	50.7328	0.0102993	-6.60131	-7.26213	3.81036e-13	1.0574e-12	Down	35.3672	15.3656	0	0	0	0
circRNA_04972|Chr06:66745995_66746688_-	0	50.7328	0.0102993	-6.60131	-7.26213	3.81036e-13	1.0574e-12	Down	35.3672	15.3656	0	0	0	0
circRNA_05245|Chr06:126715237_126715810_-	0	50.7328	0.0102993	-6.60131	-7.26213	3.81036e-13	1.0574e-12	Down	35.3672	15.3656	0	0	0	0
circRNA_05915|Chr07:125965483_126012453_+	0	50.7328	0.0102993	-6.60131	-7.26213	3.81036e-13	1.0574e-12	Down	35.3672	15.3656	0	0	0	0
circRNA_02503|Chr03:57762811_57763363_+	296.295	153.88	2.01219	1.00877	7.23	4.82981e-13	1.3282e-12	Up	106.102	23.0484	24.7295	96.7645	112.355	87.176
circRNA_03650|Chr04:184441980_184442153_-	52.7806	159.69	0.345401	-1.53366	-7.20509	5.80051e-13	1.59035e-12	Down	61.8926	15.3656	82.4315	52.7806	0	0
circRNA_10896|Chr15:5591179_5592755_+	0	49.5738	0.0105401	-6.56797	-7.18383	6.7787e-13	1.85298e-12	Down	26.5254	23.0484	0	0	0	0
circRNA_01275|Chr02:16122898_16123829_+	0	49.5355	0.0105482	-6.56686	-7.18122	6.90923e-13	1.87742e-12	Down	17.6836	15.3656	16.4863	0	0	0
circRNA_01682|Chr02:71807134_71807646_+	0	49.5355	0.0105482	-6.56686	-7.18122	6.90923e-13	1.87742e-12	Down	17.6836	15.3656	16.4863	0	0	0
circRNA_10441|Chr14:47342505_47343474_+	0	49.5355	0.0105482	-6.56686	-7.18122	6.90923e-13	1.87742e-12	Down	17.6836	15.3656	16.4863	0	0	0
circRNA_04734|Chr06:20996797_20997022_-	199.293	86.1	2.41888	1.27434	7.15203	8.5502e-13	2.30275e-12	Up	70.7345	15.3656	0	105.561	25.9281	67.8036
circRNA_10090|Chr13:141191346_141191613_+	114.442	33.0492	3.61868	1.85546	7.13389	9.75738e-13	2.62014e-12	Up	17.6836	15.3656	0	0	95.0695	19.3724
circRNA_03899|Chr04:234294320_234294618_+	46.6522	0	97.5053	6.60741	7.11804	1.0947e-12	2.92667e-12	Up	0	0	0	17.5935	0	29.0587
circRNA_09288|Chr12:147513665_147519002_-	46.6522	0	97.5053	6.60741	7.11804	1.0947e-12	2.92667e-12	Up	0	0	0	17.5935	0	29.0587
circRNA_00046|Chr01:6646663_6648752_+	0	48.4148	0.0107924	-6.53384	-7.10435	1.20888e-12	3.19915e-12	Down	17.6836	30.7312	0	0	0	0
circRNA_03057|Chr04:12177491_12177647_+	0	48.4148	0.0107924	-6.53384	-7.10435	1.20888e-12	3.19915e-12	Down	17.6836	30.7312	0	0	0	0
circRNA_04382|Chr05:146120708_146120839_+	0	48.4148	0.0107924	-6.53384	-7.10435	1.20888e-12	3.19915e-12	Down	17.6836	30.7312	0	0	0	0
circRNA_05567|Chr07:73717779_73717959_-	0	48.4148	0.0107924	-6.53384	-7.10435	1.20888e-12	3.19915e-12	Down	17.6836	30.7312	0	0	0	0
circRNA_07838|Chr10:37714853_37717747_+	0	48.4148	0.0107924	-6.53384	-7.10435	1.20888e-12	3.19915e-12	Down	17.6836	30.7312	0	0	0	0
circRNA_03450|Chr04:131644112_131648481_+	46.344	0	96.8612	6.59785	7.09598	1.28443e-12	3.36012e-12	Up	0	0	0	0	17.2854	29.0587
circRNA_05681|Chr07:83285148_83285375_-	46.344	0	96.8612	6.59785	7.09598	1.28443e-12	3.36012e-12	Up	0	0	0	0	17.2854	29.0587
circRNA_07473|Chr09:142760761_142771051_-	46.344	0	96.8612	6.59785	7.09598	1.28443e-12	3.36012e-12	Up	0	0	0	0	17.2854	29.0587
circRNA_09084|Chr12:62869063_62888115_-	34.5707	124.361	0.290503	-1.78337	-7.07999	1.44169e-12	3.75004e-12	Down	35.3672	23.0484	65.9452	0	34.5707	0
circRNA_00060|Chr01:10204575_10210611_-	81.9583	16.4863	5.19512	2.37716	7.06552	1.60013e-12	4.15034e-12	Up	0	0	16.4863	0	43.2134	38.7449
circRNA_08361|Chr11:28724875_28725676_-	0	47.7778	0.0109363	-6.51473	-7.06016	1.66306e-12	4.30135e-12	Down	0	23.0484	24.7295	0	0	0
circRNA_02682|Chr03:131501999_131514059_-	45.7628	0	95.6463	6.57964	7.0541	1.73727e-12	4.4554e-12	Up	0	0	0	26.3903	0	19.3724
circRNA_04574|Chr05:210785528_210789204_+	45.7628	0	95.6463	6.57964	7.0541	1.73727e-12	4.4554e-12	Up	0	0	0	26.3903	0	19.3724
circRNA_05190|Chr06:110284376_110284894_+	45.7628	0	95.6463	6.57964	7.0541	1.73727e-12	4.4554e-12	Up	0	0	0	26.3903	0	19.3724
circRNA_06496|Chr08:51141670_51142830_-	45.7628	0	95.6463	6.57964	7.0541	1.73727e-12	4.4554e-12	Up	0	0	0	26.3903	0	19.3724
circRNA_10747|Chr14:133547358_133547523_+	45.7628	0	95.6463	6.57964	7.0541	1.73727e-12	4.4554e-12	Up	0	0	0	26.3903	0	19.3724
circRNA_09073|Chr12:58394630_58399022_+	229.5	108.435	2.21177	1.1452	7.0538	1.74099e-12	4.42765e-12	Up	35.3672	15.3656	57.7021	35.1871	155.568	38.7449
circRNA_08133|Chr10:170999467_171002013_+	101.212	26.5254	3.98744	1.99546	7.04194	1.89575e-12	4.80782e-12	Up	26.5254	0	0	52.7806	0	48.4311
circRNA_00344|Chr01:113563815_113580018_-	142.457	50.7328	2.93441	1.55307	7.02102	2.20258e-12	5.57052e-12	Up	35.3672	15.3656	0	0	103.712	38.7449
circRNA_01277|Chr02:16122898_16146796_+	0	47.2175	0.0110661	-6.49771	-7.02098	2.20319e-12	5.52613e-12	Down	0	30.7312	16.4863	0	0	0
circRNA_03221|Chr04:37173628_37174666_-	0	47.2175	0.0110661	-6.49771	-7.02098	2.20319e-12	5.52613e-12	Down	0	30.7312	16.4863	0	0	0
circRNA_06587|Chr08:116830542_116831199_-	0	47.2175	0.0110661	-6.49771	-7.02098	2.20319e-12	5.52613e-12	Down	0	30.7312	16.4863	0	0	0
circRNA_08767|Chr11:112390305_112391998_-	0	47.2175	0.0110661	-6.49771	-7.02098	2.20319e-12	5.52613e-12	Down	0	30.7312	16.4863	0	0	0
circRNA_09155|Chr12:115178723_115182669_-	0	47.2175	0.0110661	-6.49771	-7.02098	2.20319e-12	5.52613e-12	Down	0	30.7312	16.4863	0	0	0
circRNA_02685|Chr03:131623842_131626125_+	45.3005	0	94.6801	6.56499	7.02055	2.20996e-12	5.47544e-12	Up	0	0	0	0	25.9281	19.3724
circRNA_03601|Chr04:179530651_179533903_+	45.3005	0	94.6801	6.56499	7.02055	2.20996e-12	5.47544e-12	Up	0	0	0	0	25.9281	19.3724
circRNA_04080|Chr05:22813281_22813761_-	45.3005	0	94.6801	6.56499	7.02055	2.20996e-12	5.47544e-12	Up	0	0	0	0	25.9281	19.3724
circRNA_05735|Chr07:91095762_91097719_+	45.3005	0	94.6801	6.56499	7.02055	2.20996e-12	5.47544e-12	Up	0	0	0	0	25.9281	19.3724
circRNA_03041|Chr04:8784517_8809307_-	17.2854	87.9877	0.205297	-2.28422	-6.99314	2.68796e-12	6.61486e-12	Down	26.5254	61.4623	0	0	17.2854	0
circRNA_06211|Chr07:227564279_227564440_-	19.3724	92.4706	0.218931	-2.19145	-6.98946	2.7595e-12	6.77263e-12	Down	26.5254	0	65.9452	0	0	19.3724
circRNA_05626|Chr07:80093543_80093698_+	80.6417	16.4863	5.11166	2.35379	6.9678	3.21931e-12	7.87997e-12	Up	0	0	16.4863	43.9839	17.2854	19.3724
circRNA_09164|Chr12:116602983_116603511_+	17.2854	86.7521	0.208221	-2.26381	-6.90621	4.97766e-12	1.20867e-11	Down	0	53.7795	32.9726	0	17.2854	0
circRNA_08667|Chr11:94211974_94212304_+	43.6757	0	91.2842	6.51229	6.90089	5.16777e-12	1.24985e-11	Up	0	0	0	26.3903	17.2854	0
circRNA_10916|Chr15:6721888_6722987_-	43.6757	0	91.2842	6.51229	6.90089	5.16777e-12	1.24985e-11	Up	0	0	0	26.3903	17.2854	0
circRNA_00107|Chr01:19661405_19670254_+	145.196	53.7795	2.82139	1.4964	6.89701	5.31088e-12	1.27937e-11	Up	0	53.7795	0	96.7645	0	48.4311
circRNA_02980|Chr03:227383626_227384832_-	43.5216	0	90.9621	6.50719	6.8894	5.60294e-12	1.34265e-11	Up	0	0	0	17.5935	25.9281	0
circRNA_04448|Chr05:174888995_174890191_-	43.5216	0	90.9621	6.50719	6.8894	5.60294e-12	1.34265e-11	Up	0	0	0	17.5935	25.9281	0
circRNA_10111|Chr13:149305106_149305428_-	43.5216	0	90.9621	6.50719	6.8894	5.60294e-12	1.34265e-11	Up	0	0	0	17.5935	25.9281	0
circRNA_04072|Chr05:22155794_22157966_+	25.9281	104.306	0.259769	-1.9447	-6.87539	6.18212e-12	1.4737e-11	Down	79.5763	0	24.7295	0	25.9281	0
circRNA_05548|Chr07:73307878_73308850_-	81.223	17.6836	4.79992	2.26301	6.82979	8.50382e-12	2.02187e-11	Up	17.6836	0	0	17.5935	34.5707	29.0587
circRNA_04722|Chr06:20205460_20213485_-	80.4876	17.6836	4.75646	2.24989	6.77477	1.24607e-11	2.95497e-11	Up	17.6836	0	0	35.1871	25.9281	19.3724
circRNA_07720|Chr10:11433750_11434268_-	145.469	55.4606	2.74101	1.45471	6.75983	1.38157e-11	3.2678e-11	Up	0	30.7312	24.7295	52.7806	34.5707	58.1173
circRNA_09512|Chr13:69201396_69203049_+	19.3724	88.9936	0.227484	-2.13616	-6.74812	1.49775e-11	3.53345e-11	Down	0	23.0484	65.9452	0	0	19.3724
circRNA_02250|Chr03:13584331_13585922_+	0	43.0117	0.0121481	-6.36312	-6.71704	1.85447e-11	4.33026e-11	Down	26.5254	0	16.4863	0	0	0
circRNA_04104|Chr05:24746543_24746770_-	0	43.0117	0.0121481	-6.36312	-6.71704	1.85447e-11	4.33026e-11	Down	26.5254	0	16.4863	0	0	0
circRNA_05431|Chr06:195149952_195152558_-	0	43.0117	0.0121481	-6.36312	-6.71704	1.85447e-11	4.33026e-11	Down	26.5254	0	16.4863	0	0	0
circRNA_08470|Chr11:63064058_63064766_-	74.8214	15.3656	5.08866	2.34728	6.70059	2.07573e-11	4.82225e-11	Up	0	15.3656	0	26.3903	0	48.4311
circRNA_03420|Chr04:121432108_121434307_-	0	42.4131	0.0123196	-6.3429	-6.67228	2.51864e-11	5.82894e-11	Down	17.6836	0	24.7295	0	0	0
circRNA_07852|Chr10:40827090_40842219_-	0	42.4131	0.0123196	-6.3429	-6.67228	2.51864e-11	5.82894e-11	Down	17.6836	0	24.7295	0	0	0
circRNA_04389|Chr05:151116578_151117260_-	0	41.891	0.0124731	-6.32503	-6.63291	3.29132e-11	7.51244e-11	Down	26.5254	15.3656	0	0	0	0
circRNA_06613|Chr08:126145807_126154798_-	0	41.891	0.0124731	-6.32503	-6.63291	3.29132e-11	7.51244e-11	Down	26.5254	15.3656	0	0	0	0
circRNA_08245|Chr11:4147569_4147936_+	0	41.891	0.0124731	-6.32503	-6.63291	3.29132e-11	7.51244e-11	Down	26.5254	15.3656	0	0	0	0
circRNA_10345|Chr14:26626778_26627140_-	0	41.891	0.0124731	-6.32503	-6.63291	3.29132e-11	7.51244e-11	Down	26.5254	15.3656	0	0	0	0
circRNA_11079|Chr15:53988348_53988554_+	0	41.891	0.0124731	-6.32503	-6.63291	3.29132e-11	7.51244e-11	Down	26.5254	15.3656	0	0	0	0
circRNA_05669|Chr07:83284942_83285169_-	63.3563	165.975	0.398909	-1.32587	-6.58331	4.60079e-11	1.04231e-10	Down	35.3672	130.607	0	43.9839	0	19.3724
circRNA_01421|Chr02:37963348_37964175_+	239.663	123.317	2.03097	1.02217	6.57278	4.93835e-11	1.11602e-10	Up	53.0508	53.7795	16.4863	79.171	34.5707	125.921
circRNA_06621|Chr08:126828471_126828710_-	0	40.732	0.012828	-6.28456	-6.54439	5.9737e-11	1.34666e-10	Down	17.6836	23.0484	0	0	0	0
circRNA_05032|Chr06:72472414_72474612_-	87.6595	23.0484	3.97452	1.99078	6.54336	6.01531e-11	1.3527e-10	Up	0	23.0484	0	70.3742	17.2854	0
circRNA_08723|Chr11:104008181_104009081_-	19.3724	86.0235	0.235339	-2.08719	-6.53769	6.24764e-11	1.4015e-10	Down	53.0508	0	32.9726	0	0	19.3724
circRNA_08855|Chr11:128366376_128366940_+	17.2854	81.464	0.221737	-2.17308	-6.52596	6.75693e-11	1.51203e-10	Down	35.3672	46.0967	0	0	17.2854	0
circRNA_00831|Chr01:225504099_225504274_-	72.2721	15.3656	4.91527	2.29727	6.50123	7.96671e-11	1.77839e-10	Up	0	15.3656	0	0	43.2134	29.0587
circRNA_04184|Chr05:43680018_43680170_+	0	40.095	0.0130318	-6.26182	-6.49507	8.29934e-11	1.84363e-10	Down	0	15.3656	24.7295	0	0	0
circRNA_08048|Chr10:137315061_137322869_-	0	40.095	0.0130318	-6.26182	-6.49507	8.29934e-11	1.84363e-10	Down	0	15.3656	24.7295	0	0	0
circRNA_11239|Chr15:110379627_110386957_+	0	40.095	0.0130318	-6.26182	-6.49507	8.29934e-11	1.84363e-10	Down	0	15.3656	24.7295	0	0	0
circRNA_02809|Chr03:187253233_187255037_-	164.827	71.4631	2.41031	1.26922	6.48348	8.96308e-11	1.98143e-10	Up	17.6836	53.7795	0	35.1871	129.64	0
circRNA_02812|Chr03:187253233_187267037_-	17.2854	80.7504	0.223697	-2.16038	-6.47358	9.57048e-11	2.11059e-10	Down	0	23.0484	57.7021	0	17.2854	0
circRNA_06766|Chr08:182663249_182663724_+	17.5935	81.3874	0.225903	-2.14622	-6.47234	9.64972e-11	2.12294e-10	Down	17.6836	30.7312	32.9726	17.5935	0	0
circRNA_03557|Chr04:161935502_161936859_+	113.104	38.4139	3.07691	1.62148	6.45426	1.08746e-10	2.38094e-10	Up	0	38.4139	0	0	25.9281	87.176
circRNA_04493|Chr05:196971529_196973495_-	0	39.5347	0.0132165	-6.24151	-6.45127	1.10916e-10	2.41686e-10	Down	0	23.0484	16.4863	0	0	0
circRNA_06078|Chr07:192293516_192296269_-	0	39.5347	0.0132165	-6.24151	-6.45127	1.10916e-10	2.41686e-10	Down	0	23.0484	16.4863	0	0	0
circRNA_10400|Chr14:45293243_45296394_-	0	39.5347	0.0132165	-6.24151	-6.45127	1.10916e-10	2.41686e-10	Down	0	23.0484	16.4863	0	0	0
circRNA_06849|Chr08:206688817_206690085_-	73.6238	16.4863	4.66682	2.22244	6.43088	1.26869e-10	2.75134e-10	Up	0	0	16.4863	17.5935	17.2854	38.7449
circRNA_04056|Chr05:20405171_20405822_-	126.215	47.2175	2.79341	1.48203	6.38434	1.72134e-10	3.72413e-10	Up	0	30.7312	16.4863	0	77.7842	48.4311
circRNA_00680|Chr01:200010786_200011025_+	36.966	0	77.2606	6.27166	6.37447	1.83599e-10	3.90281e-10	Up	0	0	0	17.5935	0	19.3724
circRNA_00947|Chr01:244207707_244208370_+	36.966	0	77.2606	6.27166	6.37447	1.83599e-10	3.90281e-10	Up	0	0	0	17.5935	0	19.3724
circRNA_01185|Chr02:1724435_1724899_-	36.966	0	77.2606	6.27166	6.37447	1.83599e-10	3.90281e-10	Up	0	0	0	17.5935	0	19.3724
circRNA_01257|Chr02:13581739_13581891_+	36.966	0	77.2606	6.27166	6.37447	1.83599e-10	3.90281e-10	Up	0	0	0	17.5935	0	19.3724
circRNA_01559|Chr02:54831047_54831234_+	36.966	0	77.2606	6.27166	6.37447	1.83599e-10	3.90281e-10	Up	0	0	0	17.5935	0	19.3724
circRNA_03426|Chr04:123055495_123055798_-	36.966	0	77.2606	6.27166	6.37447	1.83599e-10	3.90281e-10	Up	0	0	0	17.5935	0	19.3724
circRNA_03433|Chr04:126060587_126065800_+	36.966	0	77.2606	6.27166	6.37447	1.83599e-10	3.90281e-10	Up	0	0	0	17.5935	0	19.3724
circRNA_04470|Chr05:195902878_195907736_-	36.966	0	77.2606	6.27166	6.37447	1.83599e-10	3.90281e-10	Up	0	0	0	17.5935	0	19.3724
circRNA_08283|Chr11:11164528_11164922_+	36.966	0	77.2606	6.27166	6.37447	1.83599e-10	3.90281e-10	Up	0	0	0	17.5935	0	19.3724
circRNA_08827|Chr11:123096941_123097236_+	36.966	0	77.2606	6.27166	6.37447	1.83599e-10	3.90281e-10	Up	0	0	0	17.5935	0	19.3724
circRNA_09102|Chr12:93101252_93111164_-	36.966	0	77.2606	6.27166	6.37447	1.83599e-10	3.90281e-10	Up	0	0	0	17.5935	0	19.3724
circRNA_09794|Chr13:113287207_113290417_+	36.966	0	77.2606	6.27166	6.37447	1.83599e-10	3.90281e-10	Up	0	0	0	17.5935	0	19.3724
circRNA_11266|Chr15:112198318_112207589_+	36.966	0	77.2606	6.27166	6.37447	1.83599e-10	3.90281e-10	Up	0	0	0	17.5935	0	19.3724
circRNA_11330|Chr15:126815473_126818413_-	36.966	0	77.2606	6.27166	6.37447	1.83599e-10	3.90281e-10	Up	0	0	0	17.5935	0	19.3724
circRNA_06291|Chr07:249766305_249768213_+	17.2854	79.0693	0.228453	-2.13003	-6.34915	2.16511e-10	4.51312e-10	Down	0	46.0967	32.9726	0	17.2854	0
circRNA_02758|Chr03:173211872_173212259_+	36.6578	0	76.6165	6.25958	6.34889	2.16873e-10	4.45957e-10	Up	0	0	0	0	17.2854	19.3724
circRNA_03148|Chr04:25607029_25607475_+	36.6578	0	76.6165	6.25958	6.34889	2.16873e-10	4.45957e-10	Up	0	0	0	0	17.2854	19.3724
circRNA_03391|Chr04:116004491_116004715_+	36.6578	0	76.6165	6.25958	6.34889	2.16873e-10	4.45957e-10	Up	0	0	0	0	17.2854	19.3724
circRNA_04381|Chr05:146107885_146108400_+	36.6578	0	76.6165	6.25958	6.34889	2.16873e-10	4.45957e-10	Up	0	0	0	0	17.2854	19.3724
circRNA_05162|Chr06:100069054_100070768_-	36.6578	0	76.6165	6.25958	6.34889	2.16873e-10	4.45957e-10	Up	0	0	0	0	17.2854	19.3724
circRNA_06936|Chr09:2048145_2048325_-	36.6578	0	76.6165	6.25958	6.34889	2.16873e-10	4.45957e-10	Up	0	0	0	0	17.2854	19.3724
circRNA_07062|Chr09:17109070_17109252_+	36.6578	0	76.6165	6.25958	6.34889	2.16873e-10	4.45957e-10	Up	0	0	0	0	17.2854	19.3724
circRNA_07150|Chr09:52130062_52131818_+	36.6578	0	76.6165	6.25958	6.34889	2.16873e-10	4.45957e-10	Up	0	0	0	0	17.2854	19.3724
circRNA_08402|Chr11:43833924_43835418_-	36.6578	0	76.6165	6.25958	6.34889	2.16873e-10	4.45957e-10	Up	0	0	0	0	17.2854	19.3724
circRNA_09790|Chr13:110527835_110527986_-	36.6578	0	76.6165	6.25958	6.34889	2.16873e-10	4.45957e-10	Up	0	0	0	0	17.2854	19.3724
circRNA_10953|Chr15:13162105_13162374_+	36.6578	0	76.6165	6.25958	6.34889	2.16873e-10	4.45957e-10	Up	0	0	0	0	17.2854	19.3724
circRNA_02799|Chr03:183701882_183702703_-	161.094	70.7345	2.37999	1.25095	6.33739	2.33686e-10	4.74122e-10	Up	70.7345	0	0	17.5935	95.0695	48.4311
circRNA_01882|Chr02:108193102_108223319_+	191.834	92.1935	2.17446	1.12066	6.33727	2.33872e-10	4.73448e-10	Up	0	92.1935	0	96.7645	95.0695	0
circRNA_02922|Chr03:217934466_217941442_-	71.2286	171.731	0.433441	-1.20609	-6.21946	4.98881e-10	1.00326e-09	Down	70.7345	84.5107	16.4863	0	51.8561	19.3724
circRNA_00238|Chr01:40281543_40287003_+	34.8789	0	72.8985	6.18782	6.19853	5.6992e-10	1.12994e-09	Up	0	0	0	17.5935	17.2854	0
circRNA_00403|Chr01:136097174_136098351_+	34.8789	0	72.8985	6.18782	6.19853	5.6992e-10	1.12994e-09	Up	0	0	0	17.5935	17.2854	0
circRNA_00842|Chr01:226316955_226341549_+	34.8789	0	72.8985	6.18782	6.19853	5.6992e-10	1.12994e-09	Up	0	0	0	17.5935	17.2854	0
circRNA_01397|Chr02:34623563_34623714_+	34.8789	0	72.8985	6.18782	6.19853	5.6992e-10	1.12994e-09	Up	0	0	0	17.5935	17.2854	0
circRNA_02618|Chr03:90048209_90054429_-	34.8789	0	72.8985	6.18782	6.19853	5.6992e-10	1.12994e-09	Up	0	0	0	17.5935	17.2854	0
circRNA_04318|Chr05:127348166_127357184_+	34.8789	0	72.8985	6.18782	6.19853	5.6992e-10	1.12994e-09	Up	0	0	0	17.5935	17.2854	0
circRNA_04319|Chr05:127348166_127365898_+	34.8789	0	72.8985	6.18782	6.19853	5.6992e-10	1.12994e-09	Up	0	0	0	17.5935	17.2854	0
circRNA_05295|Chr06:143331981_143341594_+	34.8789	0	72.8985	6.18782	6.19853	5.6992e-10	1.12994e-09	Up	0	0	0	17.5935	17.2854	0
circRNA_06544|Chr08:102706045_102739315_-	34.8789	0	72.8985	6.18782	6.19853	5.6992e-10	1.12994e-09	Up	0	0	0	17.5935	17.2854	0
circRNA_07404|Chr09:110157823_110157985_+	34.8789	0	72.8985	6.18782	6.19853	5.6992e-10	1.12994e-09	Up	0	0	0	17.5935	17.2854	0
circRNA_07548|Chr09:186862428_186867399_-	34.8789	0	72.8985	6.18782	6.19853	5.6992e-10	1.12994e-09	Up	0	0	0	17.5935	17.2854	0
circRNA_08933|Chr12:5450496_5457087_-	34.8789	0	72.8985	6.18782	6.19853	5.6992e-10	1.12994e-09	Up	0	0	0	17.5935	17.2854	0
circRNA_11237|Chr15:110324883_110326045_+	180.48	86.1	2.19055	1.13129	6.19364	5.87903e-10	1.14937e-09	Up	70.7345	15.3656	0	35.1871	0	145.293
circRNA_05452|Chr06:201982449_201982724_+	36.6578	113.723	0.336856	-1.5698	-6.18426	6.23928e-10	1.21719e-09	Down	0	23.0484	90.6747	0	17.2854	19.3724
circRNA_04751|Chr06:25360515_25369178_-	123.701	48.4148	2.67006	1.41687	6.11118	9.88989e-10	1.92116e-09	Up	17.6836	30.7312	0	35.1871	69.1415	19.3724
circRNA_10439|Chr14:47322301_47323240_+	71.5367	169.882	0.440056	-1.18424	-6.09685	1.0818e-09	2.097e-09	Down	123.785	46.0967	0	17.5935	34.5707	19.3724
circRNA_02720|Chr03:155483589_155486324_-	71.6908	17.6836	4.23661	2.08291	6.09305	1.10776e-09	2.14277e-09	Up	17.6836	0	0	26.3903	25.9281	19.3724
circRNA_07790|Chr10:26407598_26408129_+	17.5935	75.9843	0.241966	-2.04712	-6.06834	1.29239e-09	2.4946e-09	Down	26.5254	0	49.4589	17.5935	0	0
circRNA_09452|Chr13:38648577_38671277_-	29.0587	97.912	0.310146	-1.68898	-6.04756	1.47057e-09	2.83256e-09	Down	26.5254	38.4139	32.9726	0	0	29.0587
circRNA_06401|Chr08:8027716_8029640_-	0	34.1699	0.0152916	-6.03112	-6.01062	1.84811e-09	3.52628e-09	Down	17.6836	0	16.4863	0	0	0
circRNA_08874|Chr11:132557194_132557649_-	0	34.1699	0.0152916	-6.03112	-6.01062	1.84811e-09	3.52628e-09	Down	17.6836	0	16.4863	0	0	0
circRNA_09052|Chr12:45769399_45786272_-	0	34.1699	0.0152916	-6.03112	-6.01062	1.84811e-09	3.52628e-09	Down	17.6836	0	16.4863	0	0	0
circRNA_09502|Chr13:65454525_65454744_-	0	34.1699	0.0152916	-6.03112	-6.01062	1.84811e-09	3.52628e-09	Down	17.6836	0	16.4863	0	0	0
circRNA_09707|Chr13:96135770_96135938_+	0	34.1699	0.0152916	-6.03112	-6.01062	1.84811e-09	3.52628e-09	Down	17.6836	0	16.4863	0	0	0
circRNA_10469|Chr14:56814082_56814249_-	0	34.1699	0.0152916	-6.03112	-6.01062	1.84811e-09	3.52628e-09	Down	17.6836	0	16.4863	0	0	0
circRNA_07216|Chr09:62548594_62549269_+	36.6578	110.921	0.345365	-1.53381	-6.0049	1.91445e-09	3.62634e-09	Down	0	61.4623	49.4589	0	17.2854	19.3724
circRNA_10866|Chr15:2899905_2900894_-	19.3724	78.379	0.258292	-1.95293	-5.97643	2.28086e-09	4.31144e-09	Down	61.8926	0	16.4863	0	0	19.3724
circRNA_04123|Chr05:31125593_31175739_+	35.1871	107.875	0.340871	-1.5527	-5.97517	2.29844e-09	4.33569e-09	Down	35.3672	23.0484	49.4589	35.1871	0	0
circRNA_06568|Chr08:111145305_111145651_+	26.3903	91.872	0.300184	-1.73608	-5.97241	2.33779e-09	4.40083e-09	Down	17.6836	0	74.1884	26.3903	0	0
circRNA_09069|Chr12:57834044_57835197_-	70.066	17.6836	4.14059	2.04984	5.96203	2.49123e-09	4.68002e-09	Up	17.6836	0	0	52.7806	17.2854	0
circRNA_09907|Chr13:128346725_128387001_-	82.7288	24.7295	3.49597	1.80569	5.95359	2.62318e-09	4.91778e-09	Up	0	0	24.7295	43.9839	0	38.7449
circRNA_09235|Chr12:136794965_136795237_-	69.9119	17.6836	4.13148	2.04666	5.94952	2.68936e-09	5.03154e-09	Up	17.6836	0	0	43.9839	25.9281	0
circRNA_02422|Chr03:36916677_36917858_-	69.7578	17.6836	4.12238	2.04348	5.93699	2.90309e-09	5.40923e-09	Up	17.6836	0	0	35.1871	34.5707	0
circRNA_07584|Chr09:192317544_192321712_-	106.843	39.5347	2.82418	1.49783	5.92019	3.21561e-09	5.95507e-09	Up	0	23.0484	16.4863	0	77.7842	29.0587
circRNA_00655|Chr01:197140112_197142268_-	0	33.0492	0.0158101	-5.98301	-5.91317	3.35587e-09	6.17724e-09	Down	17.6836	15.3656	0	0	0	0
circRNA_04064|Chr05:21077811_21083008_+	0	33.0492	0.0158101	-5.98301	-5.91317	3.35587e-09	6.17724e-09	Down	17.6836	15.3656	0	0	0	0
circRNA_06261|Chr07:238598332_238598519_-	0	33.0492	0.0158101	-5.98301	-5.91317	3.35587e-09	6.17724e-09	Down	17.6836	15.3656	0	0	0	0
circRNA_08790|Chr11:119412722_119420360_-	0	33.0492	0.0158101	-5.98301	-5.91317	3.35587e-09	6.17724e-09	Down	17.6836	15.3656	0	0	0	0
circRNA_10173|Chr14:928838_929139_-	0	33.0492	0.0158101	-5.98301	-5.91317	3.35587e-09	6.17724e-09	Down	17.6836	15.3656	0	0	0	0
circRNA_04691|Chr06:14296465_14296839_+	181.664	90.8278	2.09014	1.0636	5.91111	3.39804e-09	6.21725e-09	Up	35.3672	30.7312	24.7295	26.3903	77.7842	77.4898
circRNA_10124|Chr13:156418776_156419596_-	107.34	40.732	2.75393	1.46149	5.82657	5.6577e-09	1.02898e-08	Up	17.6836	23.0484	0	87.9677	0	19.3724
circRNA_00068|Chr01:12366688_12367807_-	103.418	38.4139	2.81341	1.49232	5.8086	6.2998e-09	1.14348e-08	Up	0	38.4139	0	0	25.9281	77.4898
circRNA_00364|Chr01:115887313_115889203_+	0	31.8519	0.0164044	-5.92977	-5.80674	6.3702e-09	1.13816e-08	Down	0	15.3656	16.4863	0	0	0
circRNA_01150|Chr01:257741313_257741549_-	0	31.8519	0.0164044	-5.92977	-5.80674	6.3702e-09	1.13816e-08	Down	0	15.3656	16.4863	0	0	0
circRNA_01904|Chr02:119537036_119538828_+	0	31.8519	0.0164044	-5.92977	-5.80674	6.3702e-09	1.13816e-08	Down	0	15.3656	16.4863	0	0	0
circRNA_01907|Chr02:120973949_120974535_-	0	31.8519	0.0164044	-5.92977	-5.80674	6.3702e-09	1.13816e-08	Down	0	15.3656	16.4863	0	0	0
circRNA_02231|Chr03:11847548_11900202_+	0	31.8519	0.0164044	-5.92977	-5.80674	6.3702e-09	1.13816e-08	Down	0	15.3656	16.4863	0	0	0
circRNA_02534|Chr03:64706925_64707116_-	0	31.8519	0.0164044	-5.92977	-5.80674	6.3702e-09	1.13816e-08	Down	0	15.3656	16.4863	0	0	0
circRNA_02755|Chr03:173031051_173123329_-	0	31.8519	0.0164044	-5.92977	-5.80674	6.3702e-09	1.13816e-08	Down	0	15.3656	16.4863	0	0	0
circRNA_03009|Chr04:5015265_5015423_-	0	31.8519	0.0164044	-5.92977	-5.80674	6.3702e-09	1.13816e-08	Down	0	15.3656	16.4863	0	0	0
circRNA_03720|Chr04:201428345_201434109_+	0	31.8519	0.0164044	-5.92977	-5.80674	6.3702e-09	1.13816e-08	Down	0	15.3656	16.4863	0	0	0
circRNA_05286|Chr06:140874138_140882756_-	0	31.8519	0.0164044	-5.92977	-5.80674	6.3702e-09	1.13816e-08	Down	0	15.3656	16.4863	0	0	0
circRNA_05972|Chr07:140064267_140065415_+	0	31.8519	0.0164044	-5.92977	-5.80674	6.3702e-09	1.13816e-08	Down	0	15.3656	16.4863	0	0	0
circRNA_06494|Chr08:51129480_51130186_-	0	31.8519	0.0164044	-5.92977	-5.80674	6.3702e-09	1.13816e-08	Down	0	15.3656	16.4863	0	0	0
circRNA_09312|Chr12:151637447_151637791_+	0	31.8519	0.0164044	-5.92977	-5.80674	6.3702e-09	1.13816e-08	Down	0	15.3656	16.4863	0	0	0
circRNA_10186|Chr14:3216420_3224878_+	0	31.8519	0.0164044	-5.92977	-5.80674	6.3702e-09	1.13816e-08	Down	0	15.3656	16.4863	0	0	0
circRNA_10843|Chr15:598635_598764_+	0	31.8519	0.0164044	-5.92977	-5.80674	6.3702e-09	1.13816e-08	Down	0	15.3656	16.4863	0	0	0
circRNA_05352|Chr06:170528775_170539265_+	90.601	30.7312	3.08092	1.62336	5.78122	7.41619e-09	1.30462e-08	Up	0	30.7312	0	0	51.8561	38.7449
circRNA_10417|Chr14:47272338_47277143_+	64.6729	16.4863	4.09945	2.03543	5.7019	1.18477e-08	2.07819e-08	Up	0	0	16.4863	0	25.9281	38.7449
circRNA_11102|Chr15:61163033_61163191_-	64.6729	16.4863	4.09945	2.03543	5.7019	1.18477e-08	2.07819e-08	Up	0	0	16.4863	0	25.9281	38.7449
circRNA_04153|Chr05:37445113_37448216_-	166.676	83.1068	2.09587	1.06755	5.67897	1.35512e-08	2.36562e-08	Up	26.5254	15.3656	41.2158	140.748	25.9281	0
circRNA_11003|Chr15:22190635_22191175_+	91.5255	33.0492	2.89406	1.53309	5.57409	2.4883e-08	4.32728e-08	Up	17.6836	15.3656	0	52.7806	0	38.7449
circRNA_03234|Chr04:39477638_39479632_-	89.4385	31.8519	2.93437	1.55305	5.5626	2.65783e-08	4.6133e-08	Up	0	15.3656	16.4863	52.7806	17.2854	19.3724
circRNA_03971|Chr05:13268216_13268453_-	87.1973	30.7312	2.96517	1.56812	5.53126	3.1794e-08	5.50815e-08	Up	0	30.7312	0	43.9839	43.2134	0
circRNA_03314|Chr04:61961242_61974201_-	17.2854	68.3398	0.26432	-1.91964	-5.51712	3.44598e-08	5.95868e-08	Down	35.3672	0	32.9726	0	17.2854	0
circRNA_07849|Chr10:39912861_39913283_+	64.6729	17.6836	3.82188	1.93428	5.51439	3.49993e-08	6.04052e-08	Up	17.6836	0	0	0	25.9281	38.7449
circRNA_04393|Chr05:151158021_151158900_-	17.5935	68.3398	0.269033	-1.89415	-5.46796	4.55254e-08	7.8424e-08	Down	35.3672	0	32.9726	17.5935	0	0
circRNA_11332|Chr15:127668755_127692091_-	98.2001	38.4139	2.67146	1.41763	5.44691	5.12528e-08	8.81239e-08	Up	0	38.4139	0	0	69.1415	29.0587
circRNA_05552|Chr07:73375982_73376712_+	17.2854	67.1425	0.269034	-1.89414	-5.41983	5.96569e-08	1.02285e-07	Down	17.6836	0	49.4589	0	17.2854	0
circRNA_06178|Chr07:224956274_224986805_-	17.2854	67.1425	0.269034	-1.89414	-5.41983	5.96569e-08	1.02285e-07	Down	17.6836	0	49.4589	0	17.2854	0
circRNA_06105|Chr07:209743592_209743917_+	19.3724	70.8262	0.285836	-1.80674	-5.39074	7.01683e-08	1.19969e-07	Down	0	46.0967	24.7295	0	0	19.3724
circRNA_08774|Chr11:114494103_114496255_-	63.0481	17.6836	3.72586	1.89758	5.37543	7.64008e-08	1.30381e-07	Up	17.6836	0	0	26.3903	17.2854	19.3724
circRNA_08661|Chr11:93707214_93707669_+	60.807	16.4863	3.85439	1.9465	5.3694	7.90005e-08	1.34316e-07	Up	0	0	16.4863	17.5935	43.2134	0
circRNA_04102|Chr05:24746518_24746745_+	46.344	116.831	0.414535	-1.27043	-5.34309	9.13774e-08	1.5507e-07	Down	70.7345	46.0967	0	0	17.2854	29.0587
circRNA_01339|Chr02:26204567_26239086_+	126.096	58.8994	2.23726	1.16174	5.28783	1.23776e-07	2.09274e-07	Up	17.6836	0	41.2158	52.7806	34.5707	38.7449
circRNA_03904|Chr04:235152742_235154292_+	87.5055	32.9726	2.77337	1.47164	5.28782	1.23786e-07	2.08903e-07	Up	0	0	32.9726	61.5774	25.9281	0
circRNA_05749|Chr07:94756714_94772701_+	19.3724	69.5371	0.291134	-1.78024	-5.28733	1.24111e-07	2.09066e-07	Down	53.0508	0	16.4863	0	0	19.3724
circRNA_10637|Chr14:89757022_89759566_-	71.2286	23.0484	3.22953	1.69133	5.27792	1.30659e-07	2.1969e-07	Up	0	23.0484	0	0	51.8561	19.3724
circRNA_01021|Chr01:255454959_255455853_+	17.2854	64.9394	0.278161	-1.84601	-5.23822	1.62136e-07	2.71615e-07	Down	26.5254	38.4139	0	0	17.2854	0
circRNA_02450|Chr03:45828227_45870032_+	138.451	68.3398	2.11713	1.08211	5.23292	1.66856e-07	2.7901e-07	Up	35.3672	0	32.9726	26.3903	34.5707	77.4898
circRNA_04350|Chr05:137092841_137093307_-	26.3903	81.464	0.338536	-1.56262	-5.21644	1.82393e-07	3.04434e-07	Down	35.3672	46.0967	0	26.3903	0	0
circRNA_07671|Chr10:4590424_4590575_-	131.643	63.7038	2.15953	1.11072	5.21157	1.87248e-07	3.11966e-07	Up	0	30.7312	32.9726	114.358	17.2854	0
circRNA_02115|Chr02:222043741_222044176_-	84.5077	31.8519	2.7726	1.47124	5.19537	2.04316e-07	3.39164e-07	Up	0	15.3656	16.4863	26.3903	0	58.1173
circRNA_04864|Chr06:51381527_51382485_-	36.6578	98.5106	0.388874	-1.36262	-5.17874	2.23395e-07	3.69492e-07	Down	35.3672	38.4139	24.7295	0	17.2854	19.3724
circRNA_03351|Chr04:92688855_92689452_-	148.004	75.9843	2.03552	1.0254	5.17766	2.2469e-07	3.70962e-07	Up	26.5254	0	49.4589	61.5774	86.4268	0
circRNA_06553|Chr08:102773358_102774426_-	109.119	48.3382	2.35904	1.2382	5.17357	2.29668e-07	3.77815e-07	Up	0	15.3656	32.9726	70.3742	0	38.7449
circRNA_08296|Chr11:13151530_13151851_+	25.9281	79.0693	0.342679	-1.54507	-5.09695	3.45175e-07	5.63765e-07	Down	0	46.0967	32.9726	0	25.9281	0
circRNA_09796|Chr13:114095995_114097287_-	71.2286	24.7295	3.00999	1.58976	5.04908	4.43942e-07	7.21209e-07	Up	0	0	24.7295	0	51.8561	19.3724
circRNA_10858|Chr15:2070041_2071208_+	119.695	57.2183	2.18608	1.12835	5.03278	4.83428e-07	7.83961e-07	Up	17.6836	23.0484	16.4863	61.5774	0	58.1173
circRNA_03903|Chr04:234994086_235002537_-	97.1566	41.891	2.42369	1.27721	5.00149	5.68894e-07	9.20923e-07	Up	26.5254	15.3656	0	0	77.7842	19.3724
circRNA_01698|Chr02:73000225_73002060_-	56.0303	16.4863	3.55161	1.82847	4.94168	7.7452e-07	1.24936e-06	Up	0	0	16.4863	0	17.2854	38.7449
circRNA_05485|Chr06:208014205_208108656_+	35.1871	92.4706	0.397654	-1.33041	-4.92624	8.38276e-07	1.34982e-06	Down	26.5254	0	65.9452	35.1871	0	0
circRNA_02068|Chr02:191800810_191801239_+	99.2437	44.209	2.34594	1.23017	4.90864	9.17112e-07	1.47416e-06	Up	44.209	0	0	0	60.4988	38.7449
circRNA_07318|Chr09:87441922_87476077_-	124.934	62.583	2.08617	1.06085	4.89113	1.00259e-06	1.60872e-06	Up	0	46.0967	16.4863	105.561	0	19.3724
circRNA_11130|Chr15:69657427_69657925_-	72.1531	26.5254	2.84262	1.50722	4.88733	1.02212e-06	1.63719e-06	Up	26.5254	0	0	52.7806	0	19.3724
circRNA_06547|Chr08:102739170_102753303_-	81.9583	32.9726	2.59756	1.37716	4.86794	1.12765e-06	1.80305e-06	Up	0	0	32.9726	0	43.2134	38.7449
circRNA_08791|Chr11:119418031_119420360_-	17.5935	60.6953	0.302917	-1.723	-4.82854	1.37536e-06	2.19146e-06	Down	44.209	0	16.4863	17.5935	0	0
circRNA_07827|Chr10:35680214_35682813_-	36.6578	93.0693	0.41161	-1.28065	-4.79852	1.59846e-06	2.54249e-06	Down	35.3672	0	57.7021	0	17.2854	19.3724
circRNA_06513|Chr08:81076118_81076423_-	52.4725	15.3656	3.56869	1.83539	4.79453	1.63053e-06	2.589e-06	Up	0	15.3656	0	35.1871	17.2854	0
circRNA_05629|Chr07:80093547_80093747_+	52.1643	15.3656	3.54773	1.8269	4.76531	1.88562e-06	2.98625e-06	Up	0	15.3656	0	17.5935	34.5707	0
circRNA_06745|Chr08:177428208_177431408_-	52.1643	15.3656	3.54773	1.8269	4.76531	1.88562e-06	2.98625e-06	Up	0	15.3656	0	17.5935	34.5707	0
circRNA_01932|Chr02:132716119_132724882_+	64.6729	23.0484	2.9323	1.55203	4.72771	2.27063e-06	3.58355e-06	Up	0	23.0484	0	0	25.9281	38.7449
circRNA_05414|Chr06:191659354_191660045_+	64.6729	23.0484	2.9323	1.55203	4.72771	2.27063e-06	3.58355e-06	Up	0	23.0484	0	0	25.9281	38.7449
circRNA_04163|Chr05:40896474_40897106_-	26.3903	74.9402	0.368007	-1.4422	-4.71499	2.41723e-06	3.79198e-06	Down	44.209	30.7312	0	26.3903	0	0
circRNA_03242|Chr04:39490728_39497597_-	17.5935	58.3773	0.314945	-1.66683	-4.62585	3.73068e-06	5.82241e-06	Down	26.5254	15.3656	16.4863	17.5935	0	0
circRNA_10819|Chr14:152148111_152149242_+	26.3903	73.7429	0.373982	-1.41896	-4.62038	3.83041e-06	5.96785e-06	Down	26.5254	30.7312	16.4863	26.3903	0	0
circRNA_06330|Chr07:254155075_254156463_-	43.6757	101.557	0.449422	-1.15386	-4.61672	3.89861e-06	6.06377e-06	Down	0	76.8279	24.7295	26.3903	17.2854	0
circRNA_04575|Chr05:210788607_210789204_+	54.5595	17.6836	3.22423	1.68895	4.61454	3.93966e-06	6.11719e-06	Up	17.6836	0	0	35.1871	0	19.3724
circRNA_10909|Chr15:6541573_6574370_+	46.344	105.48	0.459145	-1.12298	-4.60372	4.15006e-06	6.42204e-06	Down	0	23.0484	82.4315	0	17.2854	29.0587
circRNA_02594|Chr03:81407313_81408194_-	52.1643	16.4863	3.30656	1.72533	4.58031	4.64298e-06	7.17266e-06	Up	0	0	16.4863	17.5935	34.5707	0
circRNA_07955|Chr10:97026709_97040328_-	74.8214	30.7312	2.54433	1.34728	4.57384	4.78858e-06	7.38508e-06	Up	0	30.7312	0	26.3903	0	48.4311
circRNA_10454|Chr14:47453056_47453303_+	17.5935	56.5813	0.324942	-1.62175	-4.46571	7.98043e-06	1.2225e-05	Down	0	15.3656	41.2158	17.5935	0	0
circRNA_06563|Chr08:108618720_108619076_-	17.2854	56.021	0.322444	-1.63288	-4.46542	7.99116e-06	1.2221e-05	Down	0	23.0484	32.9726	0	17.2854	0
circRNA_01836|Chr02:94319286_94322898_-	78.4005	34.1699	2.39773	1.26167	4.45002	8.58614e-06	1.31089e-05	Up	17.6836	0	16.4863	35.1871	43.2134	0
circRNA_07282|Chr09:81408082_81409861_-	36.966	88.4332	0.43683	-1.19486	-4.42947	9.4466e-06	1.43986e-05	Down	0	30.7312	57.7021	17.5935	0	19.3724
circRNA_08281|Chr11:10801478_10805186_-	52.1643	17.6836	3.08268	1.62418	4.38804	1.14375e-05	1.73751e-05	Up	17.6836	0	0	17.5935	34.5707	0
circRNA_04511|Chr05:201942906_201943131_-	36.6578	86.8287	0.441194	-1.18052	-4.34721	1.37881e-05	2.09112e-05	Down	17.6836	69.1451	0	0	17.2854	19.3724
circRNA_04395|Chr05:152832453_152832638_-	17.5935	54.9002	0.334892	-1.57823	-4.31324	1.60883e-05	2.43189e-05	Down	0	38.4139	16.4863	17.5935	0	0
circRNA_10325|Chr14:22503199_22503673_-	92.9963	46.0967	2.10825	1.07604	4.2688	1.96531e-05	2.95606e-05	Up	0	46.0967	0	17.5935	17.2854	58.1173
circRNA_00455|Chr01:146689967_146690430_+	19.3724	57.2566	0.353578	-1.4999	-4.24344	2.2012e-05	3.30542e-05	Down	26.5254	30.7312	0	0	0	19.3724
circRNA_09677|Chr13:93295125_93319576_-	46.6522	15.3656	3.17285	1.66578	4.2254	2.38517e-05	3.56993e-05	Up	0	15.3656	0	17.5935	0	29.0587
circRNA_08055|Chr10:139371392_139372145_+	73.6238	32.9726	2.33341	1.22244	4.20671	2.59117e-05	3.87191e-05	Up	0	0	32.9726	17.5935	17.2854	38.7449
circRNA_06888|Chr08:211374149_211376607_-	35.1871	82.5081	0.445669	-1.16595	-4.19594	2.71738e-05	4.05387e-05	Down	17.6836	15.3656	49.4589	35.1871	0	0
circRNA_10496|Chr14:61902967_61903121_+	46.344	15.3656	3.15189	1.65622	4.19419	2.73849e-05	4.0787e-05	Up	0	15.3656	0	0	17.2854	29.0587
circRNA_01828|Chr02:92550741_92558495_-	69.7578	30.7312	2.37214	1.24619	4.15715	3.22248e-05	4.76844e-05	Up	0	30.7312	0	35.1871	34.5707	0
circRNA_02411|Chr03:35713709_35714891_+	45.7628	15.3656	3.11236	1.63801	4.135	3.54947e-05	5.2311e-05	Up	0	15.3656	0	26.3903	0	19.3724
circRNA_09414|Chr13:15661697_15662862_+	45.7628	15.3656	3.11236	1.63801	4.135	3.54947e-05	5.2311e-05	Up	0	15.3656	0	26.3903	0	19.3724
circRNA_01272|Chr02:16115688_16117006_+	45.3005	15.3656	3.08092	1.62336	4.08764	4.35784e-05	6.38638e-05	Up	0	15.3656	0	0	25.9281	19.3724
circRNA_03466|Chr04:139816665_139819122_+	45.3005	15.3656	3.08092	1.62336	4.08764	4.35784e-05	6.38638e-05	Up	0	15.3656	0	0	25.9281	19.3724
circRNA_05471|Chr06:206066364_206066521_+	45.3005	15.3656	3.08092	1.62336	4.08764	4.35784e-05	6.38638e-05	Up	0	15.3656	0	0	25.9281	19.3724
circRNA_07809|Chr10:32864179_32867110_-	26.3903	67.1425	0.410745	-1.28368	-4.08303	4.44529e-05	6.49368e-05	Down	17.6836	0	49.4589	26.3903	0	0
circRNA_05565|Chr07:73717779_73717933_-	17.2854	51.8535	0.348358	-1.52136	-4.08079	4.48829e-05	6.54603e-05	Down	35.3672	0	16.4863	0	17.2854	0
circRNA_04601|Chr06:1898408_1898658_+	38.7449	86.0235	0.470678	-1.08719	-4.04991	5.12373e-05	7.42534e-05	Down	53.0508	0	32.9726	0	0	38.7449
circRNA_08972|Chr12:9933419_9934418_+	17.5935	51.8535	0.354569	-1.49586	-4.03017	5.57359e-05	8.06448e-05	Down	35.3672	0	16.4863	17.5935	0	0
circRNA_01346|Chr02:28280381_28281714_+	17.5935	51.2549	0.35871	-1.47911	-3.97348	7.08293e-05	0.000101758	Down	26.5254	0	24.7295	17.5935	0	0
circRNA_05453|Chr06:202102656_202103564_+	17.5935	51.2549	0.35871	-1.47911	-3.97348	7.08293e-05	0.000101758	Down	26.5254	0	24.7295	17.5935	0	0
circRNA_11395|tig00066201:10704_14239_-	17.2854	50.6562	0.356592	-1.48765	-3.96715	7.27381e-05	0.000104254	Down	17.6836	0	32.9726	0	17.2854	0
circRNA_06550|Chr08:102773233_102774426_-	45.7628	16.4863	2.90078	1.53644	3.94749	7.89753e-05	0.000113016	Up	0	0	16.4863	26.3903	0	19.3724
circRNA_03496|Chr04:146698078_146724359_+	43.6757	15.3656	2.97041	1.57066	3.91899	8.89197e-05	0.000126751	Up	0	15.3656	0	26.3903	17.2854	0
circRNA_11393|tig00066201:3356_5149_+	43.6757	15.3656	2.97041	1.57066	3.91899	8.89197e-05	0.000126751	Up	0	15.3656	0	26.3903	17.2854	0
circRNA_05155|Chr06:97760911_97764628_+	81.5311	41.2158	2.06722	1.04769	3.91077	9.20029e-05	0.000130839	Up	0	0	41.2158	35.1871	17.2854	29.0587
circRNA_05895|Chr07:122443483_122445274_-	73.0425	35.3672	2.15824	1.10986	3.87915	0.000104824	0.000148841	Up	35.3672	0	0	43.9839	0	29.0587
circRNA_10169|Chr13:166809484_166814468_+	34.8789	77.7803	0.468618	-1.09351	-3.86909	0.000109243	0.000154634	Down	53.0508	0	24.7295	17.5935	17.2854	0
circRNA_06235|Chr07:237461379_237462267_+	46.6522	17.6836	2.75694	1.46307	3.84391	0.000121091	0.00017114	Up	17.6836	0	0	17.5935	0	29.0587
circRNA_10956|Chr15:13363808_13364417_+	81.5311	41.891	2.0339	1.02425	3.83883	0.000123624	0.000174449	Up	26.5254	15.3656	0	35.1871	17.2854	29.0587
circRNA_06367|Chr08:1705531_1705932_-	35.1871	77.7803	0.472759	-1.08082	-3.83261	0.000126793	0.000178645	Down	53.0508	0	24.7295	35.1871	0	0
circRNA_08738|Chr11:107105187_107119602_-	72.2721	35.3672	2.13548	1.09456	3.81554	0.000135883	0.000191157	Up	35.3672	0	0	0	43.2134	29.0587
circRNA_10639|Chr14:89791345_89793103_+	53.9432	23.0484	2.44581	1.29031	3.75616	0.00017254	0.00024198	Up	0	23.0484	0	0	34.5707	19.3724
circRNA_02053|Chr02:183150047_183151278_-	45.7628	17.6836	2.70438	1.4353	3.75284	0.000174845	0.000244837	Up	17.6836	0	0	26.3903	0	19.3724
circRNA_09309|Chr12:149856513_149857547_+	74.8214	38.4139	2.03546	1.02536	3.68071	0.000232589	0.00032371	Up	0	38.4139	0	26.3903	0	48.4311
circRNA_01077|Chr01:257436753_257437074_+	34.8789	75.3857	0.483504	-1.0484	-3.68057	0.000232714	0.000323391	Down	17.6836	0	57.7021	17.5935	17.2854	0
circRNA_03084|Chr04:14722862_14723026_-	56.3384	26.5254	2.21957	1.15028	3.50614	0.000454653	0.000623271	Up	26.5254	0	0	17.5935	0	38.7449
circRNA_00096|Chr01:18801613_18818690_-	26.3903	59.498	0.463519	-1.1093	-3.42331	0.00061864	0.000843012	Down	26.5254	0	32.9726	26.3903	0	0
circRNA_07494|Chr09:155483987_155484535_-	60.9611	30.7312	2.073	1.05172	3.39214	0.000693497	0.000939411	Up	0	30.7312	0	26.3903	34.5707	0
circRNA_03939|Chr05:9287209_9290359_+	17.2854	41.891	0.431205	-1.21355	-3.08606	0.00202828	0.00266832	Down	26.5254	15.3656	0	0	17.2854	0
circRNA_00782|Chr01:218637663_218638274_-	36.6578	16.4863	2.32364	1.21639	2.95656	0.00311089	0.00402871	Up	0	0	16.4863	0	17.2854	19.3724
circRNA_05322|Chr06:159046577_159052529_-	36.6578	16.4863	2.32364	1.21639	2.95656	0.00311089	0.00402871	Up	0	0	16.4863	0	17.2854	19.3724
circRNA_08550|Chr11:74882200_74883052_+	36.6578	16.4863	2.32364	1.21639	2.95656	0.00311089	0.00402871	Up	0	0	16.4863	0	17.2854	19.3724
circRNA_03363|Chr04:96952738_96972004_+	34.8789	15.3656	2.37214	1.24619	2.93936	0.00328893	0.00424723	Up	0	15.3656	0	17.5935	17.2854	0
circRNA_01396|Chr02:34623506_34623714_+	17.5935	40.732	0.451381	-1.14758	-2.91072	0.00360594	0.00463693	Down	17.6836	23.0484	0	17.5935	0	0
circRNA_07496|Chr09:155593941_155598381_+	36.966	17.6836	2.18453	1.12732	2.79437	0.00520003	0.0066123	Up	17.6836	0	0	17.5935	0	19.3724
circRNA_04346|Chr05:135334531_135334816_+	17.5935	39.5347	0.465052	-1.10454	-2.78073	0.00542376	0.00685383	Down	0	23.0484	16.4863	17.5935	0	0
circRNA_06598|Chr08:119404818_119414148_-	17.5935	39.5347	0.465052	-1.10454	-2.78073	0.00542376	0.00685383	Down	0	23.0484	16.4863	17.5935	0	0
circRNA_01278|Chr02:16122910_16123829_+	36.6578	17.6836	2.16631	1.11524	2.75866	0.00580397	0.00729893	Up	17.6836	0	0	0	17.2854	19.3724
circRNA_08462|Chr11:61405583_61405781_-	34.8789	16.4863	2.21088	1.14462	2.74774	0.00600077	0.0075257	Up	0	0	16.4863	17.5935	17.2854	0
circRNA_10981|Chr15:16271504_16272331_-	19.3724	41.891	0.48327	-1.0491	-2.74499	0.00605134	0.0075787	Down	26.5254	15.3656	0	0	0	19.3724
circRNA_03435|Chr04:126237268_126239967_+	34.8789	17.6836	2.06119	1.04348	2.54923	0.0107961	0.0132662	Up	17.6836	0	0	17.5935	17.2854	0

## Sheet: TT-vs-CK
circRNA	case_value	control_value	FoldChange	log2FoldChange	z-score	pValue	qValue	Regulation	Expression_CK-1	Expression_CK-2	Expression_CK-3	Expression_TT-1	Expression_TT-2	Expression_TT-3
circRNA_02477|Chr03:48573915_48587728_-	0	17770.2	3.08517e-05	-14.9843	-71.3606	0	0	Down	7559.74	10210.4	0	0	0	0
circRNA_02277|Chr03:15577784_15615891_-	978.351	4871.76	0.220196	-2.18314	-50.3351	0	0	Down	1494.27	1951.43	1426.07	0	978.351	0
circRNA_08489|Chr11:71054073_71119156_+	0	1900.02	0.000288544	-11.7589	-32.0168	6.36069e-225	1.49476e-222	Down	1034.49	0	865.531	0	0	0
circRNA_06177|Chr07:224954642_224985614_-	1691.95	0	3710.38	11.8574	31.362	6.67935e-216	1.25572e-213	Up	0	0	0	983.81	708.14	0
circRNA_02278|Chr03:15580070_15618163_-	0	1751.18	0.00031307	-11.6412	-31.0564	9.35475e-212	1.46558e-209	Down	875.339	875.838	0	0	0	0
circRNA_11206|Chr15:94995696_95049228_-	0	1487.45	0.000368577	-11.4057	-29.2113	1.39305e-187	1.87067e-185	Down	663.136	0	824.315	0	0	0
circRNA_00768|Chr01:216466071_216529290_-	319.399	1597.45	0.219234	-2.18946	-28.754	8.08349e-182	9.4981e-180	Down	636.61	614.623	346.212	0	0	319.399
circRNA_01643|Chr02:64750682_64802808_+	1427.9	3530.37	0.443485	-1.17304	-27.4325	1.12443e-165	1.1744e-163	Down	1361.64	1006.45	1162.28	0	0	1427.9
circRNA_01526|Chr02:52364297_52459057_+	0	1162.08	0.000471774	-11.0496	-26.6054	5.8847e-156	5.53162e-154	Down	433.249	291.946	436.887	0	0	0
circRNA_03241|Chr04:39490728_39496504_-	1850.94	724.804	2.8001	1.48548	24.8737	1.43146e-136	1.22325e-134	Up	159.153	268.898	296.754	616.966	736.093	497.887
circRNA_10268|Chr14:11240319_11299226_-	0	771.678	0.000710452	-10.459	-22.7329	2.1168e-114	1.65816e-112	Down	318.305	0	453.373	0	0	0
circRNA_04693|Chr06:15295334_15295834_+	52.965	603.905	0.096166	-3.37833	-22.1668	7.19008e-109	5.19898e-107	Down	238.729	192.07	173.106	25.0121	27.9529	0
circRNA_09826|Chr13:119595354_119596789_+	1875.35	865.842	2.37489	1.24786	21.9235	1.5492e-106	1.04018e-104	Up	238.729	330.36	296.754	641.978	810.634	422.734
circRNA_04982|Chr06:67004831_67034751_+	845.244	222.91	4.15771	2.05579	21.0296	3.51276e-98	2.20133e-96	Up	79.5763	69.1451	74.1884	208.434	242.258	394.552
circRNA_00028|Chr01:3809970_3810882_+	943.711	283.452	3.65057	1.86812	20.8647	1.12007e-96	6.58039e-95	Up	88.4181	38.4139	156.62	475.23	149.082	319.399
circRNA_01012|Chr01:254064084_254064607_-	1189.83	468.231	2.78628	1.47834	19.8482	1.14134e-87	6.31096e-86	Up	141.469	153.656	173.106	450.218	307.482	432.128
circRNA_04114|Chr05:24747174_24747401_-	0	516.684	0.00106107	-9.88026	-19.4257	4.67638e-84	2.31358e-82	Down	167.994	192.07	156.62	0	0	0
circRNA_03154|Chr04:26007908_26022281_+	0	512.262	0.00107023	-9.86786	-19.3597	1.68821e-83	7.93459e-82	Down	274.096	238.166	0	0	0	0
circRNA_05922|Chr07:127176047_127247411_+	0	503.707	0.00108841	-9.84356	-19.2309	2.04091e-82	9.13548e-81	Down	256.412	0	247.295	0	0	0
circRNA_09570|Chr13:77317057_77392045_-	0	475.984	0.0011518	-9.76189	-18.8033	7.09538e-79	3.03166e-77	Down	212.203	0	263.781	0	0	0
circRNA_09033|Chr12:37274091_37282298_-	163.275	739.387	0.24213	-2.04615	-18.7221	3.27296e-78	1.28191e-76	Down	291.78	192.07	255.538	41.6869	65.2234	56.3645
circRNA_05723|Chr07:89305334_89361615_-	429.615	0	942.13	9.87978	18.5489	8.32175e-77	3.12898e-75	Up	0	0	0	158.41	149.082	122.123
circRNA_06414|Chr08:11403885_11406199_+	563.894	125.673	4.9199	2.29863	18.4055	1.18697e-75	4.29134e-74	Up	79.5763	46.0967	0	216.772	55.9058	291.217
circRNA_09799|Chr13:114776585_114828003_-	300.611	976.15	0.337667	-1.56633	-17.9048	1.08091e-71	3.76316e-70	Down	318.305	361.091	296.754	0	0	300.611
circRNA_07196|Chr09:55293251_55294053_+	403.291	57.7021	7.66351	2.93801	17.8026	6.74548e-71	2.26455e-69	Up	0	0	57.7021	225.109	37.2705	140.911
circRNA_04187|Chr05:44523917_44527822_-	1227.86	572.513	2.35161	1.23365	17.559	5.07437e-69	1.6448e-67	Up	123.785	176.704	272.024	450.218	251.576	526.069
circRNA_08216|Chr10:188213355_188293833_-	281.823	894.647	0.345402	-1.53365	-16.8769	6.65257e-64	2.08447e-62	Down	274.096	307.312	313.24	0	0	281.823
circRNA_07228|Chr09:73473100_73568592_+	0	341.567	0.00160507	-9.28315	-16.4575	7.4118e-61	2.24745e-59	Down	0	176.704	164.863	0	0	0
circRNA_03333|Chr04:82607715_82638247_+	1085.27	521.989	2.2797	1.18885	16.0286	8.07198e-58	2.37115e-56	Up	282.938	0	239.051	300.145	484.517	300.611
circRNA_05364|Chr06:171918428_171924953_-	875.982	381.685	2.51646	1.3314	15.7257	1.00757e-55	2.87006e-54	Up	97.2599	169.021	115.404	333.495	288.847	253.64
circRNA_11207|Chr15:94995840_95050528_-	422.946	104.306	4.44609	2.15254	15.3073	6.83594e-53	1.88994e-51	Up	79.5763	0	24.7295	141.735	74.541	206.67
circRNA_09516|Chr13:72339021_72359386_-	16.6747	250.494	0.0729898	-3.77616	-14.8897	3.84644e-50	1.00435e-48	Down	0	69.1451	181.349	16.6747	0	0
circRNA_09397|Chr12:168076017_168082595_-	28.1823	276.521	0.11175	-3.16165	-14.571	4.29633e-48	1.0915e-46	Down	132.627	61.4623	82.4315	0	0	28.1823
circRNA_00650|Chr01:197074421_197100223_-	441.522	1061.5	0.456073	-1.13266	-14.5614	4.9419e-48	1.22247e-46	Down	344.83	345.725	370.942	0	0	441.522
circRNA_05650|Chr07:82198362_82226045_-	0	247.754	0.00221284	-8.81988	-14.43	3.35302e-47	8.08164e-46	Down	106.102	92.1935	49.4589	0	0	0
circRNA_07561|Chr09:188936227_188938294_-	219.905	0	482.244	8.91362	14.155	1.74008e-45	4.0892e-44	Up	0	0	0	116.723	18.6353	84.5468
circRNA_03412|Chr04:116021374_116021536_+	0	229.026	0.00239379	-8.70649	-13.9672	2.46999e-44	5.66291e-43	Down	106.102	122.925	0	0	0	0
circRNA_08887|Chr11:133595784_133596292_+	591.454	234.184	2.76926	1.4695	13.9168	5.00881e-44	1.12102e-42	Up	132.627	76.8279	24.7295	58.3616	288.847	244.246
circRNA_04220|Chr05:72913902_72963888_-	310.005	798.493	0.425695	-1.23211	-13.4962	1.64558e-41	3.59731e-40	Down	265.254	261.215	272.024	0	0	310.005
circRNA_08776|Chr11:114614469_114668428_-	195.797	0	429.375	8.74609	13.4915	1.75439e-41	3.74801e-40	Up	0	0	0	83.3737	37.2705	75.1527
circRNA_05302|Chr06:144106560_144138689_+	193.989	0	425.411	8.73271	13.4397	3.53959e-41	7.39381e-40	Up	0	0	0	100.048	0	93.9409
circRNA_07930|Chr10:86755424_86756044_+	993.751	541.452	2.01242	1.00893	13.4282	4.13513e-41	8.45005e-40	Up	176.836	199.753	164.863	283.471	447.246	263.034
circRNA_06481|Chr08:47908331_47930500_+	243.788	41.2158	6.48558	2.69724	13.2465	4.72621e-40	9.45242e-39	Up	0	0	41.2158	0	55.9058	187.882
circRNA_03864|Chr04:227063727_227145118_+	260.894	703.477	0.406644	-1.29816	-13.1924	9.69871e-40	1.89933e-38	Down	406.723	0	296.754	0	260.894	0
circRNA_07726|Chr10:11440564_11451643_-	170.555	0	374.021	8.54698	12.7372	3.67413e-37	7.04833e-36	Up	0	0	0	58.3616	65.2234	46.9704
circRNA_09520|Chr13:72497964_72503831_+	474.243	183.505	2.8337	1.50269	12.6673	8.97325e-37	1.68697e-35	Up	17.6836	99.8763	65.9452	175.085	177.035	122.123
circRNA_07844|Chr10:39021151_39025275_-	246.649	49.4589	5.46808	2.45103	12.6359	1.33825e-36	2.46657e-35	Up	0	0	49.4589	125.061	65.2234	56.3645
circRNA_03792|Chr04:216282298_216282703_+	164.332	0	360.373	8.49335	12.5402	4.50048e-36	8.13548e-35	Up	0	0	0	33.3495	65.2234	65.7586
circRNA_11292|Chr15:121395580_121395947_+	46.9704	272.254	0.18917	-2.40225	-12.5313	5.03114e-36	8.92316e-35	Down	53.0508	46.0967	173.106	0	0	46.9704
circRNA_08871|Chr11:129899512_129983593_+	317.793	767.202	0.454189	-1.13864	-12.425	1.91121e-35	3.32693e-34	Down	265.254	238.166	263.781	0	195.67	122.123
circRNA_06704|Chr08:164447014_164448247_+	405.507	145.015	3.06611	1.61641	12.3522	4.74183e-35	8.10421e-34	Up	0	46.0967	98.9178	125.061	167.717	112.729
circRNA_09634|Chr13:87100887_87101097_-	157.317	0	344.99	8.43041	12.3122	7.78488e-35	1.30675e-33	Up	0	0	0	91.7111	18.6353	46.9704
circRNA_07119|Chr09:34598037_34695062_+	353.595	817.896	0.474034	-1.07694	-12.2658	1.38259e-34	2.28005e-33	Down	291.78	245.849	280.267	241.784	111.812	0
circRNA_06402|Chr08:8027716_8029645_-	0	162.606	0.00337158	-8.21236	-12.0934	1.14517e-33	1.82451e-32	Down	88.4181	0	74.1884	0	0	0
circRNA_08230|Chr11:302601_313275_-	150.558	0	330.167	8.36705	12.0863	1.24838e-33	1.92373e-32	Up	0	0	0	66.699	83.8587	0
circRNA_09717|Chr13:102935735_102936180_+	155.954	15.3656	11.1288	3.47623	11.9288	8.37986e-33	1.25033e-31	Up	0	15.3656	0	100.048	55.9058	0
circRNA_07688|Chr10:6562089_6655034_+	0	156.404	0.00350528	-8.15625	-11.8945	1.26379e-32	1.85619e-31	Down	79.5763	76.8279	0	0	0	0
circRNA_05721|Chr07:88978789_88979057_-	269.853	73.7046	4.01452	2.00523	11.6824	1.56737e-31	2.23232e-30	Up	17.6836	23.0484	32.9726	166.747	27.9529	75.1527
circRNA_00238|Chr01:40281543_40287003_+	138.645	0	304.043	8.24813	11.6715	1.78346e-31	2.50217e-30	Up	0	0	0	16.6747	18.6353	103.335
circRNA_04311|Chr05:123959910_123967114_+	138.263	0	303.205	8.24415	11.6578	2.09461e-31	2.89549e-30	Up	0	0	0	16.6747	65.2234	56.3645
circRNA_01855|Chr02:101870919_101871071_-	137.435	0	301.39	8.23549	11.6281	2.96756e-31	4.04276e-30	Up	0	0	0	25.0121	37.2705	75.1527
circRNA_02986|Chr04:2770315_2775272_-	229.974	53.0508	4.75321	2.2489	11.5942	4.41103e-31	5.92338e-30	Up	53.0508	0	0	108.386	65.2234	56.3645
circRNA_01600|Chr02:58861463_58927812_+	0	145.244	0.00377461	-8.04946	-11.5235	1.00427e-30	1.32959e-29	Down	53.0508	92.1935	0	0	0	0
circRNA_06300|Chr07:251415780_251443955_+	0	143.894	0.00381003	-8.03598	-11.4774	1.71381e-30	2.23748e-29	Down	0	61.4623	82.4315	0	0	0
circRNA_00488|Chr01:152832678_152832848_-	131.288	0	287.909	8.16947	11.4036	4.01039e-30	5.16407e-29	Up	0	0	0	0	27.9529	103.335
circRNA_01274|Chr02:16115688_16123829_+	407.175	163.895	2.72405	1.44575	11.4036	4.01369e-30	5.09847e-29	Up	35.3672	46.0967	82.4315	116.723	93.1763	197.276
circRNA_05155|Chr06:97760911_97764628_+	202.582	41.2158	5.38938	2.43012	11.3945	4.45138e-30	5.50566e-29	Up	0	0	41.2158	25.0121	111.812	65.7586
circRNA_00295|Chr01:66320405_66320938_+	129.287	0	283.522	8.14732	11.3291	9.41277e-30	1.14909e-28	Up	0	0	0	91.7111	0	37.5764
circRNA_04596|Chr06:990772_999769_-	197.452	39.5347	5.47625	2.45319	11.3107	1.16136e-29	1.39959e-28	Up	0	23.0484	16.4863	66.699	93.1763	37.5764
circRNA_10927|Chr15:8923580_8930975_-	128.792	0	282.436	8.14178	11.3106	1.16322e-29	1.38408e-28	Up	0	0	0	16.6747	74.541	37.5764
circRNA_07473|Chr09:142760761_142771051_-	127.659	0	279.951	8.12903	11.2679	1.88935e-29	2.19257e-28	Up	0	0	0	25.0121	83.8587	18.7882
circRNA_06976|Chr09:5863144_5864459_+	459.299	202.855	2.48263	1.31187	11.2493	2.33325e-29	2.6747e-28	Up	123.785	46.0967	32.9726	141.735	223.623	93.9409
circRNA_04637|Chr06:6173651_6174176_+	126.755	0	277.969	8.11878	11.2338	2.78372e-29	3.15264e-28	Up	0	0	0	33.3495	65.2234	28.1823
circRNA_02336|Chr03:27573539_27580871_-	16.6747	163.934	0.11153	-3.1645	-11.2225	3.16024e-29	3.53646e-28	Down	44.209	53.7795	65.9452	16.6747	0	0
circRNA_09012|Chr12:23032494_23049392_+	0	135.766	0.00403814	-7.95209	-11.1937	4.37966e-29	4.84338e-28	Down	26.5254	84.5107	24.7295	0	0	0
circRNA_00047|Chr01:6646663_6649794_+	163.541	24.7295	7.25124	2.85823	11.1796	5.13267e-29	5.61013e-28	Up	0	0	24.7295	116.723	18.6353	28.1823
circRNA_04106|Chr05:24746746_24746973_+	216.01	552.503	0.428688	-1.222	-11.1491	7.23324e-29	7.81523e-28	Down	123.785	338.043	90.6747	66.699	121.129	28.1823
circRNA_02120|Chr02:223115579_223117774_-	221.407	53.7795	4.51414	2.17445	11.1424	7.80289e-29	8.3349e-28	Up	0	53.7795	0	100.048	93.1763	28.1823
circRNA_06785|Chr08:184640064_184645363_-	174.972	30.7312	6.24295	2.64223	11.0978	1.28528e-28	1.35748e-27	Up	0	30.7312	0	100.048	27.9529	46.9704
circRNA_09069|Chr12:57834044_57835197_-	143.583	17.6836	8.90292	3.15428	10.9817	4.67839e-28	4.83262e-27	Up	17.6836	0	0	50.0242	46.5882	46.9704
circRNA_08248|Chr11:4176750_4188228_+	120.01	0	263.177	8.03989	10.9735	5.12267e-28	5.23403e-27	Up	0	0	0	16.6747	0	103.335
circRNA_00566|Chr01:184757737_184769654_+	238.504	65.4614	3.99495	1.99818	10.9572	6.13868e-28	6.13868e-27	Up	17.6836	23.0484	24.7295	41.6869	55.9058	140.911
circRNA_07118|Chr09:34594350_34679431_+	118.571	0	260.021	8.02248	10.9168	9.57995e-28	9.47911e-27	Up	0	0	0	25.0121	46.5882	46.9704
circRNA_02779|Chr03:181957097_181957369_-	154.416	23.0484	7.34603	2.87697	10.8989	1.16689e-27	1.14258e-26	Up	0	23.0484	0	41.6869	0	112.729
circRNA_08344|Chr11:17901103_17938459_-	116.84	0	256.225	8.00127	10.848	2.03891e-27	1.97585e-26	Up	0	0	0	41.6869	0	75.1527
circRNA_07019|Chr09:10246755_10250507_+	191.228	41.2158	5.08731	2.3469	10.8467	2.06696e-27	1.9826e-26	Up	0	0	41.2158	41.6869	93.1763	56.3645
circRNA_05702|Chr07:84183901_84199060_-	0	125.673	0.00436243	-7.84065	-10.8257	2.60118e-27	2.46981e-26	Down	79.5763	46.0967	0	0	0	0
circRNA_03516|Chr04:148940564_148941288_-	0	125.52	0.00436776	-7.83889	-10.82	2.76899e-27	2.60285e-26	Down	44.209	15.3656	65.9452	0	0	0
circRNA_03565|Chr04:163616475_163616634_+	0	125.243	0.00437742	-7.8357	-10.8096	3.10082e-27	2.88591e-26	Down	17.6836	107.559	0	0	0	0
circRNA_03364|Chr04:96971469_96972004_+	167.947	30.7312	5.9923	2.58311	10.7389	6.68403e-27	6.1598e-26	Up	0	30.7312	0	0	139.764	28.1823
circRNA_02436|Chr03:39238489_39239928_+	113.287	0	248.434	7.95672	10.7046	9.68172e-27	8.79306e-26	Up	0	0	0	66.699	46.5882	0
circRNA_08383|Chr11:35223410_35225042_-	113.287	0	248.434	7.95672	10.7046	9.68172e-27	8.79306e-26	Up	0	0	0	66.699	46.5882	0
circRNA_05974|Chr07:140196284_140196659_+	25.0121	174.38	0.157273	-2.66866	-10.6372	2.00097e-26	1.77445e-25	Down	35.3672	15.3656	123.647	25.0121	0	0
circRNA_06066|Chr07:184689236_184701513_-	110.616	0	242.576	7.92229	10.5949	3.14646e-26	2.76418e-25	Up	0	0	0	16.6747	0	93.9409
circRNA_02915|Chr03:217828401_217829663_+	0	118.397	0.00463051	-7.75461	-10.5484	5.16461e-26	4.49512e-25	Down	44.209	0	74.1884	0	0	0
circRNA_04466|Chr05:187083115_187084073_+	16.6747	150.249	0.121688	-3.03874	-10.5442	5.40263e-26	4.65915e-25	Down	44.209	15.3656	90.6747	16.6747	0	0
circRNA_04102|Chr05:24746518_24746745_+	0	116.831	0.00469258	-7.7354	-10.4873	9.87757e-26	8.44083e-25	Down	70.7345	46.0967	0	0	0	0
circRNA_10486|Chr14:59483494_59486415_-	471.532	228.313	2.26455	1.17922	10.4846	1.01699e-25	8.61236e-25	Up	70.7345	99.8763	57.7021	200.097	121.129	150.305
circRNA_05954|Chr07:137440318_137441562_+	0	116.601	0.00470183	-7.73256	-10.4783	1.08649e-25	9.11874e-25	Down	17.6836	0	98.9178	0	0	0
circRNA_08301|Chr11:13151928_13152417_+	426.179	195.747	2.38725	1.25535	10.4709	1.17569e-25	9.78005e-25	Up	35.3672	61.4623	98.9178	108.386	195.67	122.123
circRNA_01321|Chr02:20021099_20021400_-	230.625	67.7412	3.73298	1.90033	10.4223	1.962e-25	1.61779e-24	Up	26.5254	0	41.2158	33.3495	0	197.276
circRNA_00964|Chr01:245326024_245326785_-	214.279	58.4156	4.02209	2.00795	10.4186	2.04008e-25	1.66755e-24	Up	35.3672	23.0484	0	83.3737	74.541	56.3645
circRNA_08237|Chr11:1713985_1715210_-	106.389	0	233.306	7.86608	10.4178	2.05732e-25	1.66714e-24	Up	0	0	0	50.0242	0	56.3645
circRNA_06075|Chr07:192150914_192152259_+	127.812	15.3656	9.1206	3.18913	10.4123	2.17864e-25	1.75036e-24	Up	0	15.3656	0	25.0121	65.2234	37.5764
circRNA_03183|Chr04:33034927_33035258_-	106.236	0	232.971	7.86401	10.4113	2.2026e-25	1.75461e-24	Up	0	0	0	50.0242	18.6353	37.5764
circRNA_07775|Chr10:24053535_24057075_+	197.91	49.4589	4.38758	2.13342	10.4092	2.25064e-25	1.77782e-24	Up	0	0	49.4589	66.699	37.2705	93.9409
circRNA_02903|Chr03:216670353_216673552_-	105.93	0	232.3	7.85985	10.3983	2.52481e-25	1.96956e-24	Up	0	0	0	50.0242	55.9058	0
circRNA_06013|Chr07:158229485_158231979_+	105.93	0	232.3	7.85985	10.3983	2.52481e-25	1.96956e-24	Up	0	0	0	50.0242	55.9058	0
circRNA_04253|Chr05:101052193_101138289_-	104.122	0	228.336	7.83502	10.3209	5.66829e-25	4.36737e-24	Up	0	0	0	66.699	18.6353	18.7882
circRNA_07440|Chr09:126717503_126742260_-	0	111.95	0.00489718	-7.67383	-10.2935	7.54243e-25	5.76413e-24	Down	70.7345	0	41.2158	0	0	0
circRNA_01468|Chr02:43175324_43182118_+	416.034	192.293	2.37228	1.24627	10.2867	8.09124e-25	6.13368e-24	Up	106.102	61.4623	24.7295	116.723	158.4	140.911
circRNA_07477|Chr09:146212613_146213153_+	103.182	0	226.274	7.82193	10.2803	8.64352e-25	6.49993e-24	Up	0	0	0	0	18.6353	84.5468
circRNA_05667|Chr07:83284920_83285147_-	112.041	345.834	0.35523	-1.49318	-10.2791	8.75422e-25	6.53093e-24	Down	79.5763	192.07	74.1884	0	83.8587	28.1823
circRNA_04684|Chr06:13057811_13057994_-	0	111.466	0.00491843	-7.66759	-10.2739	9.23548e-25	6.83571e-24	Down	88.4181	23.0484	0	0	0	0
circRNA_10368|Chr14:30876922_30958864_-	280.752	624.765	0.492728	-1.02114	-10.2601	1.06627e-24	7.8304e-24	Down	159.153	284.263	181.349	0	130.447	150.305
circRNA_08487|Chr11:69836892_69838207_-	0	110.753	0.00495012	-7.65832	-10.2451	1.24543e-24	9.07524e-24	Down	53.0508	0	57.7021	0	0	0
circRNA_03303|Chr04:58263688_58264136_+	102.162	0	224.037	7.80759	10.236	1.36738e-24	9.88722e-24	Up	0	0	0	83.3737	0	18.7882
circRNA_00446|Chr01:146121420_146133428_-	124.565	15.3656	8.88892	3.15201	10.2251	1.53043e-24	1.09817e-23	Up	0	15.3656	0	50.0242	74.541	0
circRNA_01763|Chr02:80359807_80368188_+	0	110.231	0.00497356	-7.6515	-10.2239	1.55042e-24	1.10409e-23	Down	61.8926	15.3656	32.9726	0	0	0
circRNA_05695|Chr07:83285681_83285908_-	0	109.24	0.00501867	-7.63848	-10.1834	2.3509e-24	1.64914e-23	Down	0	84.5107	24.7295	0	0	0
circRNA_02150|Chr02:225767905_225773184_-	99.1081	0	217.34	7.76381	10.1017	5.42978e-24	3.78074e-23	Up	0	0	0	33.3495	0	65.7586
circRNA_00610|Chr01:191910716_191911024_+	541.616	291.265	2.03894	1.02782	10.0564	8.60968e-24	5.95081e-23	Up	26.5254	99.8763	164.863	233.446	223.623	84.5468
circRNA_06267|Chr07:240833858_240836766_-	97.5926	0	214.017	7.74158	10.034	1.08009e-23	7.41086e-23	Up	0	0	0	41.6869	55.9058	0
circRNA_04550|Chr05:204523030_204523745_-	154.147	30.7312	5.49992	2.45941	10.0077	1.40985e-23	9.60333e-23	Up	0	30.7312	0	116.723	18.6353	18.7882
circRNA_04255|Chr05:101071810_101151112_-	0	104.359	0.0052534	-7.57253	-9.98081	1.84946e-23	1.25071e-22	Down	0	38.4139	65.9452	0	0	0
circRNA_09003|Chr12:20186841_20197490_+	0	103.238	0.00531043	-7.55696	-9.93343	2.97829e-23	1.99971e-22	Down	0	53.7795	49.4589	0	0	0
circRNA_04265|Chr05:103362509_103375713_+	0	103.108	0.00531712	-7.55514	-9.92791	3.14777e-23	2.09851e-22	Down	61.8926	0	41.2158	0	0	0
circRNA_04238|Chr05:85639777_85680672_+	413.997	199.171	2.27915	1.18849	9.88433	4.86833e-23	3.2227e-22	Up	141.469	0	57.7021	133.398	149.082	131.517
circRNA_04118|Chr05:27371860_27373590_+	198.738	56.0976	3.88452	1.95774	9.86804	5.72738e-23	3.76485e-22	Up	17.6836	38.4139	0	58.3616	65.2234	75.1527
circRNA_08231|Chr11:309770_313275_-	93.635	0	205.338	7.68186	9.85411	6.57973e-23	4.2951e-22	Up	0	0	0	0	37.2705	56.3645
circRNA_01487|Chr02:45464884_45465215_-	93.4821	0	205.003	7.6795	9.84706	7.05781e-23	4.57541e-22	Up	0	0	0	0	55.9058	37.5764
circRNA_06165|Chr07:223680969_223681738_-	201.081	57.7021	3.82102	1.93396	9.84602	7.13116e-23	4.59129e-22	Up	0	0	57.7021	41.6869	37.2705	122.123
circRNA_07457|Chr09:131107723_131160363_-	84.3174	282.744	0.326982	-1.61272	-9.83142	8.24444e-23	5.27196e-22	Down	0	192.07	90.6747	0	27.9529	56.3645
circRNA_03417|Chr04:117004708_117014563_-	214.458	66.0984	3.55757	1.83089	9.80016	1.12406e-22	7.13929e-22	Up	35.3672	30.7312	0	0	195.67	18.7882
circRNA_01018|Chr01:255449513_255455853_+	117.361	15.3656	8.37483	3.06606	9.79923	1.1345e-22	7.08591e-22	Up	0	15.3656	0	33.3495	65.2234	18.7882
circRNA_09682|Chr13:93384334_93387842_-	117.361	15.3656	8.37483	3.06606	9.79923	1.1345e-22	7.08591e-22	Up	0	15.3656	0	33.3495	65.2234	18.7882
circRNA_05280|Chr06:139571984_139572781_+	91.8274	0	201.374	7.65373	9.7703	1.51002e-22	9.33829e-22	Up	0	0	0	16.6747	0	75.1527
circRNA_03499|Chr04:146852133_146852338_-	0	99.1476	0.00552954	-7.49863	-9.75762	1.7112e-22	1.05133e-21	Down	53.0508	46.0967	0	0	0	0
circRNA_00218|Chr01:36764614_36798938_-	257.518	570.578	0.494873	-1.01487	-9.75449	1.7649e-22	1.07728e-21	Down	194.52	268.898	107.161	191.76	0	65.7586
circRNA_07380|Chr09:104635021_104635179_-	0	99.071	0.00553381	-7.49751	-9.75429	1.76838e-22	1.07244e-21	Down	35.3672	30.7312	32.9726	0	0	0
circRNA_00343|Chr01:113559950_113580018_-	91.2158	0	200.033	7.64409	9.7417	2.00173e-22	1.20232e-21	Up	0	0	0	16.6747	74.541	0
circRNA_10772|Chr14:135538522_135540802_-	91.2158	0	200.033	7.64409	9.7417	2.00173e-22	1.20232e-21	Up	0	0	0	16.6747	74.541	0
circRNA_10417|Chr14:47272338_47277143_+	118.494	16.4863	7.88088	2.97836	9.71129	2.69897e-22	1.60571e-21	Up	0	0	16.4863	25.0121	55.9058	37.5764
circRNA_05893|Chr07:122370442_122421645_+	136.302	24.7295	6.04351	2.59539	9.69937	3.03373e-22	1.79353e-21	Up	0	0	24.7295	33.3495	46.5882	56.3645
circRNA_02428|Chr03:38243209_38243647_-	0	96.8295	0.00566191	-7.4645	-9.65593	4.63929e-22	2.72558e-21	Down	35.3672	61.4623	0	0	0	0
circRNA_00351|Chr01:113608599_113610024_-	89.2553	0	195.733	7.61275	9.6492	4.95424e-22	2.89254e-21	Up	0	0	0	33.3495	55.9058	0
circRNA_11126|Chr15:68776000_68777818_-	88.6573	0	194.422	7.60305	9.62072	6.53705e-22	3.7931e-21	Up	0	0	0	41.6869	0	46.9704
circRNA_04740|Chr06:23067340_23073067_-	214.764	69.1451	3.40566	1.76793	9.57388	1.02971e-21	5.93819e-21	Up	0	69.1451	0	0	158.4	56.3645
circRNA_00602|Chr01:191904129_191906289_+	87.6006	0	192.105	7.58575	9.5701	1.06802e-21	6.12157e-21	Up	0	0	0	50.0242	0	37.5764
circRNA_04570|Chr05:210537577_210539735_-	0	94.8653	0.00577915	-7.43493	-9.56853	1.08437e-21	6.17763e-21	Down	61.8926	0	32.9726	0	0	0
circRNA_00612|Chr01:191910716_191921134_+	87.2948	0	191.434	7.5807	9.55538	1.23135e-21	6.97272e-21	Up	0	0	0	50.0242	37.2705	0
circRNA_06538|Chr08:98861369_98861733_-	390.118	188.533	2.26887	1.18197	9.55275	1.263e-21	7.10909e-21	Up	106.102	0	82.4315	100.048	139.764	150.305
circRNA_00545|Chr01:179590538_179591700_-	18.7882	136.771	0.150623	-2.73099	-9.53659	1.47606e-21	8.25891e-21	Down	0	46.0967	90.6747	0	0	18.7882
circRNA_05342|Chr06:165554093_165554633_+	265.845	102.118	2.85449	1.51323	9.52976	1.57649e-21	8.76865e-21	Up	0	69.1451	32.9726	41.6869	158.4	65.7586
circRNA_00466|Chr01:150559806_150566838_+	16.6747	130.961	0.13961	-2.84052	-9.52351	1.67434e-21	9.2581e-21	Down	44.209	53.7795	32.9726	16.6747	0	0
circRNA_11197|Chr15:93654763_93727921_-	492.127	266.635	2.02377	1.01705	9.50224	2.05423e-21	1.12922e-20	Up	141.469	92.1935	32.9726	183.422	158.4	150.305
circRNA_05485|Chr06:208014205_208108656_+	0	92.4706	0.0059288	-7.39804	-9.4604	3.06776e-21	1.66687e-20	Down	26.5254	0	65.9452	0	0	0
circRNA_02167|Chr02:228956071_228958202_-	285.916	117.277	2.67318	1.41856	9.41836	4.58201e-21	2.47534e-20	Up	44.209	15.3656	57.7021	183.422	102.494	0
circRNA_06774|Chr08:182763113_182763400_+	0	91.3882	0.00599903	-7.38106	-9.41093	4.9177e-21	2.64151e-20	Down	35.3672	23.0484	32.9726	0	0	0
circRNA_07439|Chr09:126465942_126477834_+	130.447	353.833	0.404237	-1.30673	-9.39826	5.54741e-21	2.96282e-20	Down	114.943	115.242	123.647	0	130.447	0
circRNA_02687|Chr03:136105052_136111287_+	162.969	41.2158	4.33553	2.11621	9.39706	5.61066e-21	2.97967e-20	Up	0	0	41.2158	41.6869	102.494	18.7882
circRNA_07637|Chr09:198324083_198326872_-	82.4334	0	180.773	7.49804	9.31675	1.19961e-20	6.335e-20	Up	0	0	0	16.6747	0	65.7586
circRNA_09512|Chr13:69201396_69203049_+	0	88.9936	0.00616045	-7.34275	-9.30015	1.40253e-20	7.36526e-20	Down	0	23.0484	65.9452	0	0	0
circRNA_04372|Chr05:144775630_144784385_+	0	87.9494	0.00623358	-7.32572	-9.25124	2.21899e-20	1.15881e-19	Down	17.6836	53.7795	16.4863	0	0	0
circRNA_03898|Chr04:234269620_234294618_+	181.006	53.0508	3.74112	1.90347	9.24282	2.40095e-20	1.2469e-19	Up	53.0508	0	0	50.0242	65.2234	65.7586
circRNA_06849|Chr08:206688817_206690085_-	110.463	16.4863	7.34672	2.8771	9.21792	3.02927e-20	1.56457e-19	Up	0	0	16.4863	16.6747	18.6353	75.1527
circRNA_09456|Chr13:39332565_39333280_-	80.3199	0	176.138	7.46057	9.21019	3.2555e-20	1.66314e-19	Up	0	0	0	33.3495	0	46.9704
circRNA_04511|Chr05:201942906_201943131_-	0	86.8287	0.00631404	-7.30722	-9.19834	3.63534e-20	1.84714e-19	Down	17.6836	69.1451	0	0	0	0
circRNA_00649|Chr01:197072743_197098628_-	0	86.7521	0.00631962	-7.30595	-9.19471	3.76023e-20	1.90033e-19	Down	0	53.7795	32.9726	0	0	0
circRNA_04080|Chr05:22813281_22813761_-	79.9376	0	175.3	7.45368	9.19072	3.90209e-20	1.96148e-19	Up	0	0	0	33.3495	46.5882	0
circRNA_05969|Chr07:139955329_139957732_+	0	86.1	0.00636748	-7.29506	-9.1637	5.01461e-20	2.5073e-19	Down	70.7345	15.3656	0	0	0	0
circRNA_04601|Chr06:1898408_1898658_+	0	86.0235	0.00637315	-7.29378	-9.16005	5.18718e-20	2.57987e-19	Down	53.0508	0	32.9726	0	0	0
circRNA_02405|Chr03:35707009_35711763_+	79.2632	0	173.821	7.44146	9.15624	5.37394e-20	2.65171e-19	Up	0	0	0	41.6869	0	37.5764
circRNA_04448|Chr05:174888995_174890191_-	79.2632	0	173.821	7.44146	9.15624	5.37394e-20	2.65171e-19	Up	0	0	0	41.6869	0	37.5764
circRNA_09363|Chr12:161590650_161591007_-	78.9574	0	173.15	7.43588	9.14053	6.21446e-20	3.0425e-19	Up	0	0	0	41.6869	37.2705	0
circRNA_04595|Chr06:990772_991111_-	241.558	92.4706	2.8643	1.51818	9.10551	8.58599e-20	4.16022e-19	Up	26.5254	0	65.9452	91.7111	55.9058	93.9409
circRNA_09083|Chr12:62869063_62871273_-	312.892	141.446	2.42552	1.2783	9.09761	9.23408e-20	4.4513e-19	Up	44.209	23.0484	74.1884	41.6869	149.082	122.123
circRNA_03223|Chr04:37361419_37362973_-	408.448	212.272	2.10982	1.07712	9.07139	1.17508e-19	5.6356e-19	Up	44.209	69.1451	98.9178	100.048	195.67	112.729
circRNA_06423|Chr08:13676863_13677328_-	162.142	44.209	4.02147	2.00772	9.06149	1.28678e-19	6.13996e-19	Up	44.209	0	0	50.0242	74.541	37.5764
circRNA_07840|Chr10:38086048_38090010_-	77.1498	0	169.186	7.40247	9.04693	1.47047e-19	6.98101e-19	Up	0	0	0	58.3616	0	18.7882
circRNA_09114|Chr12:101764801_101766634_-	0	83.6288	0.00655564	-7.25305	-9.04484	1.4989e-19	7.08021e-19	Down	17.6836	0	65.9452	0	0	0
circRNA_02545|Chr03:66535704_66541344_+	76.9969	0	168.851	7.39961	9.03895	1.58191e-19	7.41643e-19	Up	0	0	0	58.3616	18.6353	0
circRNA_07778|Chr10:24063371_24064106_+	76.9969	0	168.851	7.39961	9.03895	1.58191e-19	7.41643e-19	Up	0	0	0	58.3616	18.6353	0
circRNA_04350|Chr05:137092841_137093307_-	0	81.464	0.00672985	-7.21521	-8.93884	3.93263e-19	1.83003e-18	Down	35.3672	46.0967	0	0	0	0
circRNA_05941|Chr07:136397081_136400899_+	74.9998	0	164.472	7.36169	8.93374	4.1183e-19	1.907e-18	Up	0	0	0	0	18.6353	56.3645
circRNA_03774|Chr04:212958203_212958482_-	0	81.3108	0.00674253	-7.2125	-8.93128	4.21117e-19	1.94044e-18	Down	0	15.3656	65.9452	0	0	0
circRNA_04924|Chr06:63297233_63299845_-	74.8469	0	164.136	7.35875	8.92562	4.43229e-19	2.03237e-18	Up	0	0	0	0	37.2705	37.5764
circRNA_02619|Chr03:90051865_90054075_-	74.694	0	163.801	7.3558	8.91748	4.77037e-19	2.1715e-18	Up	0	0	0	0	55.9058	18.7882
circRNA_03450|Chr04:131644112_131648481_+	74.694	0	163.801	7.3558	8.91748	4.77037e-19	2.1715e-18	Up	0	0	0	0	55.9058	18.7882
circRNA_05850|Chr07:112228988_112229738_-	399.396	208.703	2.09834	1.06925	8.91677	4.80066e-19	2.16953e-18	Up	88.4181	46.0967	74.1884	175.085	139.764	84.5468
circRNA_02422|Chr03:36916677_36917858_-	108.196	17.6836	6.70876	2.74605	8.90735	5.22682e-19	2.35082e-18	Up	17.6836	0	0	33.3495	37.2705	37.5764
circRNA_02809|Chr03:187253233_187255037_-	204.44	71.4631	3.13679	1.64929	8.89504	5.83983e-19	2.61402e-18	Up	17.6836	53.7795	0	91.7111	0	112.729
circRNA_11161|Chr15:86415188_86417730_+	102.8	15.3656	7.33574	2.87494	8.88902	6.1648e-19	2.7464e-18	Up	0	15.3656	0	0	65.2234	37.5764
circRNA_00060|Chr01:10204575_10210611_-	105.103	16.4863	6.99023	2.80534	8.8769	6.87466e-19	3.03389e-18	Up	0	0	16.4863	58.3616	27.9529	18.7882
circRNA_04986|Chr06:67034376_67034553_-	73.0393	0	160.172	7.32348	8.82871	1.0589e-18	4.65126e-18	Up	0	0	0	16.6747	0	56.3645
circRNA_06776|Chr08:182849781_182853638_+	72.8864	0	159.837	7.32046	8.82044	1.14009e-18	4.98459e-18	Up	0	0	0	16.6747	18.6353	37.5764
circRNA_05140|Chr06:95486141_95489715_-	0	79.0693	0.00693366	-7.17217	-8.81949	1.14986e-18	5.00402e-18	Down	0	46.0967	32.9726	0	0	0
circRNA_07755|Chr10:16043393_16043809_+	72.8099	0	159.669	7.31894	8.8163	1.183e-18	5.12454e-18	Up	0	0	0	16.6747	27.9529	28.1823
circRNA_02728|Chr03:155528890_155529243_-	72.7334	0	159.502	7.31743	8.81216	1.22754e-18	5.28097e-18	Up	0	0	0	16.6747	37.2705	18.7882
circRNA_08350|Chr11:19346009_19347026_+	72.7334	0	159.502	7.31743	8.81216	1.22754e-18	5.28097e-18	Up	0	0	0	16.6747	37.2705	18.7882
circRNA_02684|Chr03:131513996_131526304_-	72.5805	0	159.166	7.31439	8.80387	1.32175e-18	5.63465e-18	Up	0	0	0	16.6747	55.9058	0
circRNA_07817|Chr10:33273693_33275741_+	72.5805	0	159.166	7.31439	8.80387	1.32175e-18	5.63465e-18	Up	0	0	0	16.6747	55.9058	0
circRNA_08376|Chr11:30433788_30503529_-	117.743	23.0484	5.60141	2.48579	8.79961	1.37296e-18	5.81345e-18	Up	0	23.0484	0	33.3495	18.6353	65.7586
circRNA_10090|Chr13:141191346_141191613_+	136.684	33.0492	4.53481	2.18104	8.77016	1.78414e-18	7.52057e-18	Up	17.6836	15.3656	0	33.3495	0	103.335
circRNA_05163|Chr06:100069054_100070781_-	100.916	15.3656	7.2013	2.84826	8.76587	1.85334e-18	7.77742e-18	Up	0	15.3656	0	16.6747	37.2705	46.9704
circRNA_10169|Chr13:166809484_166814468_+	0	77.7803	0.00704857	-7.14845	-8.75428	2.05416e-18	8.58182e-18	Down	53.0508	0	24.7295	0	0	0
circRNA_03603|Chr04:180671255_180764036_+	0	77.1816	0.00710325	-7.13731	-8.72376	2.69118e-18	1.11441e-17	Down	44.209	0	32.9726	0	0	0
circRNA_03669|Chr04:187211538_187213508_+	70.9258	0	155.538	7.28112	8.71344	2.94784e-18	1.21534e-17	Up	0	0	0	33.3495	0	37.5764
circRNA_05219|Chr06:118353841_118362030_-	70.7729	0	155.202	7.27801	8.70502	3.17526e-18	1.30338e-17	Up	0	0	0	33.3495	18.6353	18.7882
circRNA_00457|Chr01:147192894_147195924_-	70.62	0	154.867	7.27489	8.69658	3.42033e-18	1.38882e-17	Up	0	0	0	33.3495	37.2705	0
circRNA_00660|Chr01:197392517_197393853_+	70.62	0	154.867	7.27489	8.69658	3.42033e-18	1.38882e-17	Up	0	0	0	33.3495	37.2705	0
circRNA_00781|Chr01:218634592_218638274_-	70.62	0	154.867	7.27489	8.69658	3.42033e-18	1.38882e-17	Up	0	0	0	33.3495	37.2705	0
circRNA_07060|Chr09:17038750_17039181_+	70.62	0	154.867	7.27489	8.69658	3.42033e-18	1.38882e-17	Up	0	0	0	33.3495	37.2705	0
circRNA_03541|Chr04:159447289_159498577_-	222.809	86.1	2.83747	1.5046	8.68696	3.7226e-18	1.49541e-17	Up	70.7345	15.3656	0	16.6747	65.2234	140.911
circRNA_07560|Chr09:188706211_188708551_+	130.676	30.7312	4.6625	2.2211	8.67224	4.23714e-18	1.69486e-17	Up	0	30.7312	0	0	102.494	28.1823
circRNA_04951|Chr06:65911178_65922698_-	0	75.9843	0.00721517	-7.11475	-8.66226	4.62486e-18	1.84211e-17	Down	26.5254	0	49.4589	0	0	0
circRNA_07822|Chr10:33522348_33529724_+	99.1081	15.3656	7.07231	2.82218	8.64645	5.3124e-18	2.10703e-17	Up	0	15.3656	0	33.3495	0	65.7586
circRNA_06845|Chr08:206589204_206597991_+	68.8124	0	150.903	7.23748	8.59596	8.25735e-18	3.24088e-17	Up	0	0	0	50.0242	0	18.7882
circRNA_10850|Chr15:662529_663929_+	68.8124	0	150.903	7.23748	8.59596	8.25735e-18	3.24088e-17	Up	0	0	0	50.0242	0	18.7882
circRNA_10968|Chr15:14588145_14631805_+	117.59	24.7295	5.21385	2.38235	8.58043	9.45206e-18	3.6867e-17	Up	0	0	24.7295	33.3495	37.2705	46.9704
circRNA_04751|Chr06:25360515_25369178_-	159.699	48.4148	3.61682	1.85472	8.53096	1.45141e-17	5.63772e-17	Up	17.6836	30.7312	0	0	0	159.699
circRNA_09963|Chr13:133370830_133377503_-	0	72.6222	0.00754921	-7.04946	-8.48621	2.13493e-17	8.25859e-17	Down	26.5254	46.0967	0	0	0	0
circRNA_03220|Chr04:37172639_37174666_-	0	72.5839	0.0075532	-7.0487	-8.48417	2.17262e-17	8.36992e-17	Down	17.6836	38.4139	16.4863	0	0	0
circRNA_06235|Chr07:237461379_237462267_+	100.763	17.6836	6.24784	2.64336	8.42299	3.66989e-17	1.40804e-16	Up	17.6836	0	0	16.6747	55.9058	28.1823
circRNA_10439|Chr14:47322301_47323240_+	334.329	169.882	2.15788	1.10961	8.40595	4.24413e-17	1.62174e-16	Up	123.785	46.0967	0	25.0121	83.8587	225.458
circRNA_10310|Chr14:19229566_19229716_+	65.4528	0	143.535	7.16526	8.40435	4.30223e-17	1.63728e-16	Up	0	0	0	0	37.2705	28.1823
circRNA_04139|Chr05:35274082_35315497_-	61.3024	205.863	0.326512	-1.61479	-8.39574	4.62971e-17	1.75481e-16	Down	79.5763	76.8279	49.4589	33.3495	27.9529	0
circRNA_11369|Chr15:139137049_139171775_+	97.7456	16.4863	6.50092	2.70064	8.39194	4.78188e-17	1.80521e-16	Up	0	0	16.4863	41.6869	37.2705	18.7882
circRNA_06105|Chr07:209743592_209743917_+	0	70.8262	0.00774064	-7.01333	-8.39003	4.86037e-17	1.8275e-16	Down	0	46.0967	24.7295	0	0	0
circRNA_08140|Chr10:171121480_171128146_+	164.179	53.0508	3.39332	1.7627	8.35287	6.6623e-17	2.49504e-16	Up	53.0508	0	0	33.3495	83.8587	46.9704
circRNA_10640|Chr14:89791345_89793309_+	0	69.5371	0.00788413	-6.98683	-8.32003	8.79406e-17	3.28032e-16	Down	53.0508	0	16.4863	0	0	0
circRNA_01836|Chr02:94319286_94322898_-	130.942	34.1699	4.20181	2.07101	8.3078	9.74906e-17	3.60792e-16	Up	17.6836	0	16.4863	75.0363	55.9058	0
circRNA_03113|Chr04:19232017_19256748_+	63.6452	0	139.571	7.12486	8.29866	1.05295e-16	3.87388e-16	Up	0	0	0	16.6747	0	46.9704
circRNA_07721|Chr10:11433750_11434804_-	63.6452	0	139.571	7.12486	8.29866	1.05295e-16	3.87388e-16	Up	0	0	0	16.6747	0	46.9704
circRNA_07934|Chr10:89662685_89663199_-	169.094	385.799	0.480581	-1.05715	-8.29113	1.12181e-16	4.10313e-16	Down	141.469	153.656	90.6747	0	0	169.094
circRNA_02657|Chr03:108735488_108738713_+	63.2629	0	138.733	7.11617	8.27606	1.2732e-16	4.62983e-16	Up	0	0	0	16.6747	46.5882	0
circRNA_02756|Chr03:173197285_173212259_+	63.2629	0	138.733	7.11617	8.27606	1.2732e-16	4.62983e-16	Up	0	0	0	16.6747	46.5882	0
circRNA_03000|Chr04:4453835_4454306_+	95.938	16.4863	6.38069	2.67371	8.26957	1.34443e-16	4.86062e-16	Up	0	0	16.4863	58.3616	0	37.5764
circRNA_09760|Chr13:108010792_108015814_-	154.937	48.4148	3.50897	1.81105	8.26724	1.37098e-16	4.93761e-16	Up	17.6836	30.7312	0	33.3495	65.2234	56.3645
circRNA_02450|Chr03:45828227_45870032_+	0	68.3398	0.00802226	-6.96177	-8.25427	1.5283e-16	5.47277e-16	Down	35.3672	0	32.9726	0	0	0
circRNA_03314|Chr04:61961242_61974201_-	0	68.3398	0.00802226	-6.96177	-8.25427	1.5283e-16	5.47277e-16	Down	35.3672	0	32.9726	0	0	0
circRNA_00430|Chr01:143729660_143730007_-	162.142	53.0508	3.35122	1.74469	8.24174	1.6972e-16	6.02025e-16	Up	53.0508	0	0	50.0242	74.541	37.5764
circRNA_00927|Chr01:240672079_240672675_-	62.5885	0	137.254	7.1007	8.23598	1.78099e-16	6.24676e-16	Up	0	0	0	25.0121	0	37.5764
circRNA_04343|Chr05:135018468_135020011_+	62.5885	0	137.254	7.1007	8.23598	1.78099e-16	6.24676e-16	Up	0	0	0	25.0121	0	37.5764
circRNA_05500|Chr06:210110168_210112899_-	62.5885	0	137.254	7.1007	8.23598	1.78099e-16	6.24676e-16	Up	0	0	0	25.0121	0	37.5764
circRNA_08158|Chr10:180280835_180285329_-	62.5885	0	137.254	7.1007	8.23598	1.78099e-16	6.24676e-16	Up	0	0	0	25.0121	0	37.5764
circRNA_08194|Chr10:186211310_186217273_-	62.5885	0	137.254	7.1007	8.23598	1.78099e-16	6.24676e-16	Up	0	0	0	25.0121	0	37.5764
circRNA_10070|Chr13:138920697_138923771_+	0	67.7412	0.00809316	-6.94908	-8.22112	2.01614e-16	6.98038e-16	Down	26.5254	0	41.2158	0	0	0
circRNA_10295|Chr14:18773670_18820115_-	0	67.7412	0.00809316	-6.94908	-8.22112	2.01614e-16	6.98038e-16	Down	26.5254	0	41.2158	0	0	0
circRNA_03037|Chr04:7614688_7616210_-	62.2826	0	136.583	7.09364	8.21771	2.07426e-16	7.14215e-16	Up	0	0	0	25.0121	37.2705	0
circRNA_06225|Chr07:233704142_233704294_-	0	67.2574	0.00815137	-6.93874	-8.19419	2.52288e-16	8.65513e-16	Down	44.209	23.0484	0	0	0	0
circRNA_09079|Chr12:62826622_62846499_-	0	67.2191	0.00815602	-6.93792	-8.19205	2.56808e-16	8.77817e-16	Down	35.3672	15.3656	16.4863	0	0	0
circRNA_00380|Chr01:122062748_122063791_+	61.5318	0	134.937	7.07614	8.17262	3.0177e-16	1.02777e-15	Up	0	0	0	33.3495	0	28.1823
circRNA_02365|Chr03:29342219_29350407_+	61.3024	0	134.434	7.07075	8.15877	3.38445e-16	1.14438e-15	Up	0	0	0	33.3495	27.9529	0
circRNA_06297|Chr07:251324672_251325140_+	61.3024	0	134.434	7.07075	8.15877	3.38445e-16	1.14438e-15	Up	0	0	0	33.3495	27.9529	0
circRNA_08765|Chr11:111766409_111767162_+	61.3024	0	134.434	7.07075	8.15877	3.38445e-16	1.14438e-15	Up	0	0	0	33.3495	27.9529	0
circRNA_05447|Chr06:198593788_198596782_+	0	66.6205	0.00822931	-6.92501	-8.15855	3.39082e-16	1.13835e-15	Down	26.5254	15.3656	24.7295	0	0	0
circRNA_00756|Chr01:211417610_211417834_-	18.6353	112.042	0.182371	-2.45505	-8.13929	3.97594e-16	1.33003e-15	Down	0	46.0967	65.9452	0	18.6353	0
circRNA_06843|Chr08:206542388_206543239_+	91.5216	15.3656	6.53094	2.70729	8.13092	4.26035e-16	1.42012e-15	Up	0	15.3656	0	16.6747	37.2705	37.5764
circRNA_00117|Chr01:20457632_20459651_-	0	66.0984	0.00829431	-6.91366	-8.12917	4.32244e-16	1.43319e-15	Down	35.3672	30.7312	0	0	0	0
circRNA_04783|Chr06:31305028_31306284_+	0	66.0984	0.00829431	-6.91366	-8.12917	4.32244e-16	1.43319e-15	Down	35.3672	30.7312	0	0	0	0
circRNA_02481|Chr03:48666490_48668676_+	215.934	89.6305	2.64159	1.40141	8.10907	5.10105e-16	1.68245e-15	Up	17.6836	30.7312	41.2158	66.699	130.447	18.7882
circRNA_01681|Chr02:71807125_71807646_+	80.3199	234.146	0.376129	-1.4107	-8.10441	5.30006e-16	1.74198e-15	Down	123.785	69.1451	41.2158	33.3495	0	46.9704
circRNA_04294|Chr05:119596184_119596773_-	60.3221	0	132.284	7.0475	8.09923	5.53071e-16	1.8083e-15	Up	0	0	0	41.6869	18.6353	0
circRNA_07829|Chr10:35682537_35707146_-	60.3221	0	132.284	7.0475	8.09923	5.53071e-16	1.8083e-15	Up	0	0	0	41.6869	18.6353	0
circRNA_07216|Chr09:62548594_62549269_+	18.6353	110.921	0.184214	-2.44055	-8.07089	6.97858e-16	2.26985e-15	Down	0	61.4623	49.4589	0	18.6353	0
circRNA_01616|Chr02:61555464_61583923_+	138.682	41.2158	3.6894	1.88339	8.03237	9.56044e-16	3.08825e-15	Up	0	0	41.2158	91.7111	0	46.9704
circRNA_03604|Chr04:180763663_180764036_+	152.302	49.4589	3.37647	1.75552	8.02214	1.03916e-15	3.34523e-15	Up	0	0	49.4589	58.3616	0	93.9409
circRNA_01570|Chr02:56196417_56197952_+	89.714	15.3656	6.40195	2.67851	8.00446	1.1999e-15	3.8495e-15	Up	0	15.3656	0	33.3495	0	56.3645
circRNA_00375|Chr01:118467668_118467840_+	0	63.7803	0.00859575	-6.86216	-7.99692	1.27572e-15	4.05813e-15	Down	17.6836	46.0967	0	0	0	0
circRNA_00722|Chr01:206176287_206176991_+	0	63.7803	0.00859575	-6.86216	-7.99692	1.27572e-15	4.05813e-15	Down	17.6836	46.0967	0	0	0	0
circRNA_02984|Chr03:229418262_229420875_-	161.314	55.4606	3.18925	1.67322	7.98223	1.43714e-15	4.54852e-15	Up	0	30.7312	24.7295	58.3616	46.5882	56.3645
circRNA_10266|Chr14:11032645_11045008_-	0	63.1434	0.00868246	-6.84768	-7.96004	1.71977e-15	5.42477e-15	Down	0	38.4139	24.7295	0	0	0
circRNA_04998|Chr06:68683445_68684071_-	110.31	26.5254	4.55987	2.18899	7.89625	2.87425e-15	9.00597e-15	Up	26.5254	0	0	16.6747	37.2705	56.3645
circRNA_04471|Chr05:195953789_195953977_+	56.1352	0	123.102	6.94371	7.83773	4.58774e-15	1.42797e-14	Up	0	0	0	0	27.9529	28.1823
circRNA_02908|Chr03:216886080_216886550_+	56.0587	0	122.935	6.94175	7.83284	4.76978e-15	1.47003e-14	Up	0	0	0	0	37.2705	18.7882
circRNA_06074|Chr07:192123559_192125486_+	56.0587	0	122.935	6.94175	7.83284	4.76978e-15	1.47003e-14	Up	0	0	0	0	37.2705	18.7882
circRNA_06469|Chr08:45283331_45285354_-	56.0587	0	122.935	6.94175	7.83284	4.76978e-15	1.47003e-14	Up	0	0	0	0	37.2705	18.7882
circRNA_08008|Chr10:130421278_130426314_+	56.0587	0	122.935	6.94175	7.83284	4.76978e-15	1.47003e-14	Up	0	0	0	0	37.2705	18.7882
circRNA_09521|Chr13:72514859_72515556_+	56.0587	0	122.935	6.94175	7.83284	4.76978e-15	1.47003e-14	Up	0	0	0	0	37.2705	18.7882
circRNA_00396|Chr01:134240118_134252814_+	0	60.6953	0.00903266	-6.79063	-7.81608	5.44931e-15	1.65772e-14	Down	44.209	0	16.4863	0	0	0
circRNA_10441|Chr14:47342505_47343474_+	148.75	49.5355	3.29262	1.71924	7.81313	5.57845e-15	1.69153e-14	Up	17.6836	15.3656	16.4863	83.3737	46.5882	18.7882
circRNA_11003|Chr15:22190635_22191175_+	120.644	33.0492	4.00264	2.00095	7.7987	6.25504e-15	1.89059e-14	Up	17.6836	15.3656	0	83.3737	37.2705	0
circRNA_06662|Chr08:143180836_143181411_-	91.2158	17.6836	5.65588	2.49975	7.76957	7.87529e-15	2.37268e-14	Up	17.6836	0	0	16.6747	74.541	0
circRNA_06413|Chr08:11329355_11334341_-	0	59.5746	0.00920258	-6.76375	-7.74894	9.26609e-15	2.77835e-14	Down	44.209	15.3656	0	0	0	0
circRNA_09921|Chr13:129838836_129839242_-	0	59.5746	0.00920258	-6.76375	-7.74894	9.26609e-15	2.77835e-14	Down	44.209	15.3656	0	0	0	0
circRNA_00096|Chr01:18801613_18818690_-	0	59.498	0.00921443	-6.76189	-7.74433	9.60903e-15	2.85838e-14	Down	26.5254	0	32.9726	0	0	0
circRNA_03818|Chr04:218738658_218739130_-	0	59.498	0.00921443	-6.76189	-7.74433	9.60903e-15	2.85838e-14	Down	26.5254	0	32.9726	0	0	0
circRNA_08387|Chr11:38617059_38617873_-	0	59.498	0.00921443	-6.76189	-7.74433	9.60903e-15	2.85838e-14	Down	26.5254	0	32.9726	0	0	0
circRNA_07340|Chr09:93845087_93847266_+	152.977	53.0508	3.1618	1.66075	7.73187	1.0598e-14	3.13274e-14	Up	53.0508	0	0	50.0242	46.5882	56.3645
circRNA_02484|Chr03:48972994_48978544_-	54.2511	0	118.971	6.89446	7.716	1.20041e-14	3.52071e-14	Up	0	0	0	16.6747	0	37.5764
circRNA_08859|Chr11:128516158_128516474_+	54.2511	0	118.971	6.89446	7.716	1.20041e-14	3.52071e-14	Up	0	0	0	16.6747	0	37.5764
circRNA_10917|Chr15:7241005_7242066_+	54.2511	0	118.971	6.89446	7.716	1.20041e-14	3.52071e-14	Up	0	0	0	16.6747	0	37.5764
circRNA_10997|Chr15:19637438_19637634_+	54.2511	0	118.971	6.89446	7.716	1.20041e-14	3.52071e-14	Up	0	0	0	16.6747	0	37.5764
circRNA_03081|Chr04:14611990_14612453_+	0	58.8994	0.00930808	-6.7473	-7.7081	1.27701e-14	3.71637e-14	Down	17.6836	0	41.2158	0	0	0
circRNA_06759|Chr08:182221768_182310943_-	54.0982	0	118.635	6.89039	7.706	1.29824e-14	3.76071e-14	Up	0	0	0	16.6747	18.6353	18.7882
circRNA_10195|Chr14:4650150_4651181_+	54.0982	0	118.635	6.89039	7.706	1.29824e-14	3.76071e-14	Up	0	0	0	16.6747	18.6353	18.7882
circRNA_01279|Chr02:16122910_16146796_+	53.9453	0	118.3	6.8863	7.69598	1.40411e-14	3.99352e-14	Up	0	0	0	16.6747	37.2705	0
circRNA_01762|Chr02:80359807_80361233_+	53.9453	0	118.3	6.8863	7.69598	1.40411e-14	3.99352e-14	Up	0	0	0	16.6747	37.2705	0
circRNA_01981|Chr02:156317380_156363586_+	53.9453	0	118.3	6.8863	7.69598	1.40411e-14	3.99352e-14	Up	0	0	0	16.6747	37.2705	0
circRNA_02607|Chr03:88774871_88780117_-	53.9453	0	118.3	6.8863	7.69598	1.40411e-14	3.99352e-14	Up	0	0	0	16.6747	37.2705	0
circRNA_02758|Chr03:173211872_173212259_+	53.9453	0	118.3	6.8863	7.69598	1.40411e-14	3.99352e-14	Up	0	0	0	16.6747	37.2705	0
circRNA_03117|Chr04:19598653_19599284_-	53.9453	0	118.3	6.8863	7.69598	1.40411e-14	3.99352e-14	Up	0	0	0	16.6747	37.2705	0
circRNA_05145|Chr06:97002857_97003951_+	53.9453	0	118.3	6.8863	7.69598	1.40411e-14	3.99352e-14	Up	0	0	0	16.6747	37.2705	0
circRNA_05978|Chr07:140304113_140304461_-	53.9453	0	118.3	6.8863	7.69598	1.40411e-14	3.99352e-14	Up	0	0	0	16.6747	37.2705	0
circRNA_09954|Chr13:132338178_132348063_-	53.9453	0	118.3	6.8863	7.69598	1.40411e-14	3.99352e-14	Up	0	0	0	16.6747	37.2705	0
circRNA_10607|Chr14:87044014_87044208_-	53.9453	0	118.3	6.8863	7.69598	1.40411e-14	3.99352e-14	Up	0	0	0	16.6747	37.2705	0
circRNA_03351|Chr04:92688855_92689452_-	187.194	75.9843	2.70127	1.43364	7.68034	1.58663e-14	4.43878e-14	Up	26.5254	0	49.4589	0	83.8587	103.335
circRNA_03728|Chr04:203087504_203088887_-	0	58.4156	0.00938517	-6.7354	-7.67866	1.6076e-14	4.48411e-14	Down	35.3672	23.0484	0	0	0	0
circRNA_10008|Chr13:137710876_137711066_-	0	58.3773	0.00939132	-6.73446	-7.67632	1.63719e-14	4.55312e-14	Down	26.5254	15.3656	16.4863	0	0	0
circRNA_08069|Chr10:151275102_151374753_-	53.1944	0	116.653	6.86608	7.64654	2.0646e-14	5.72486e-14	Up	0	0	0	25.0121	0	28.1823
circRNA_08868|Chr11:128576432_128578312_+	18.7882	104.436	0.197259	-2.34184	-7.64426	2.10146e-14	5.80993e-14	Down	17.6836	53.7795	32.9726	0	0	18.7882
circRNA_00783|Chr01:219108913_219119746_-	128.792	304.205	0.464219	-1.10712	-7.64264	2.12807e-14	5.86623e-14	Down	167.994	53.7795	82.4315	16.6747	74.541	37.5764
circRNA_00455|Chr01:146689967_146690430_+	0	57.2566	0.00957515	-6.70649	-7.60749	2.79473e-14	7.68141e-14	Down	26.5254	30.7312	0	0	0	0
circRNA_01598|Chr02:58793007_58793343_+	0	57.2183	0.00958156	-6.70552	-7.60512	2.84635e-14	7.8005e-14	Down	17.6836	23.0484	16.4863	0	0	0
circRNA_02678|Chr03:122286886_122287931_+	52.1377	0	114.336	6.83713	7.5762	3.55823e-14	9.65293e-14	Up	0	0	0	33.3495	0	18.7882
circRNA_03568|Chr04:164268744_164268929_+	52.1377	0	114.336	6.83713	7.5762	3.55823e-14	9.65293e-14	Up	0	0	0	33.3495	0	18.7882
circRNA_06567|Chr08:111136154_111162064_+	52.1377	0	114.336	6.83713	7.5762	3.55823e-14	9.65293e-14	Up	0	0	0	33.3495	0	18.7882
circRNA_10863|Chr15:2895711_2900894_-	52.1377	0	114.336	6.83713	7.5762	3.55823e-14	9.65293e-14	Up	0	0	0	33.3495	0	18.7882
circRNA_00868|Chr01:229043075_229043407_-	51.9847	0	114.001	6.8329	7.56595	3.85051e-14	1.0239e-13	Up	0	0	0	33.3495	18.6353	0
circRNA_02267|Chr03:15516590_15517282_+	51.9847	0	114.001	6.8329	7.56595	3.85051e-14	1.0239e-13	Up	0	0	0	33.3495	18.6353	0
circRNA_03073|Chr04:12853707_12855638_-	51.9847	0	114.001	6.8329	7.56595	3.85051e-14	1.0239e-13	Up	0	0	0	33.3495	18.6353	0
circRNA_03825|Chr04:218739572_218740278_-	51.9847	0	114.001	6.8329	7.56595	3.85051e-14	1.0239e-13	Up	0	0	0	33.3495	18.6353	0
circRNA_05171|Chr06:103260710_103304816_+	51.9847	0	114.001	6.8329	7.56595	3.85051e-14	1.0239e-13	Up	0	0	0	33.3495	18.6353	0
circRNA_05537|Chr07:72800059_72813645_+	51.9847	0	114.001	6.8329	7.56595	3.85051e-14	1.0239e-13	Up	0	0	0	33.3495	18.6353	0
circRNA_07099|Chr09:29805891_29806040_+	51.9847	0	114.001	6.8329	7.56595	3.85051e-14	1.0239e-13	Up	0	0	0	33.3495	18.6353	0
circRNA_08156|Chr10:180256717_180282587_-	51.9847	0	114.001	6.8329	7.56595	3.85051e-14	1.0239e-13	Up	0	0	0	33.3495	18.6353	0
circRNA_09519|Chr13:72497964_72503492_+	51.9847	0	114.001	6.8329	7.56595	3.85051e-14	1.0239e-13	Up	0	0	0	33.3495	18.6353	0
circRNA_09534|Chr13:74625010_74627248_+	51.9847	0	114.001	6.8329	7.56595	3.85051e-14	1.0239e-13	Up	0	0	0	33.3495	18.6353	0
circRNA_04112|Chr05:24746946_24747173_-	0	56.5813	0.00968942	-6.68937	-7.5656	3.86071e-14	1.00948e-13	Down	0	15.3656	41.2158	0	0	0
circRNA_10454|Chr14:47453056_47453303_+	0	56.5813	0.00968942	-6.68937	-7.5656	3.86071e-14	1.00948e-13	Down	0	15.3656	41.2158	0	0	0
circRNA_04140|Chr05:35274810_35316225_+	146.677	330.186	0.487083	-1.03776	-7.55419	4.21471e-14	1.09746e-13	Down	106.102	92.1935	131.89	25.0121	55.9058	65.7586
circRNA_08799|Chr11:120523926_120524333_-	112.613	30.7312	4.01799	2.00648	7.54812	4.41601e-14	1.1467e-13	Up	0	30.7312	0	75.0363	0	37.5764
circRNA_01244|Chr02:12048613_12048768_+	0	56.0976	0.00977298	-6.67699	-7.5354	4.86853e-14	1.26072e-13	Down	17.6836	38.4139	0	0	0	0
circRNA_10167|Chr13:166779361_166779626_-	0	56.021	0.00978634	-6.67502	-7.5306	5.05076e-14	1.30253e-13	Down	0	23.0484	32.9726	0	0	0
circRNA_10721|Chr14:127233399_127233585_+	0	56.021	0.00978634	-6.67502	-7.5306	5.05076e-14	1.30253e-13	Down	0	23.0484	32.9726	0	0	0
circRNA_02594|Chr03:81407313_81408194_-	85.3342	16.4863	5.67546	2.50474	7.52334	5.33954e-14	1.37136e-13	Up	0	0	16.4863	66.699	18.6353	0
circRNA_09789|Chr13:110519773_110527716_+	168.824	66.0218	2.80381	1.48739	7.49679	6.53976e-14	1.67048e-13	Up	17.6836	15.3656	32.9726	75.0363	18.6353	75.1527
circRNA_07831|Chr10:35749362_35750397_-	0	55.4606	0.00988522	-6.66051	-7.49538	6.61089e-14	1.68407e-13	Down	0	30.7312	24.7295	0	0	0
circRNA_02840|Chr03:196462365_196462533_+	0	54.9002	0.00998612	-6.64586	-7.45992	8.65723e-14	2.19052e-13	Down	0	38.4139	16.4863	0	0	0
circRNA_05235|Chr06:124728840_124730635_-	0	54.9002	0.00998612	-6.64586	-7.45992	8.65723e-14	2.19052e-13	Down	0	38.4139	16.4863	0	0	0
circRNA_08550|Chr11:74882200_74883052_+	84.3174	16.4863	5.60783	2.48744	7.44903	9.40284e-14	2.36962e-13	Up	0	0	16.4863	0	27.9529	56.3645
circRNA_03945|Chr05:10662828_10663322_+	220.543	102.678	2.35514	1.23581	7.4374	1.02683e-13	2.58079e-13	Up	0	61.4623	41.2158	33.3495	83.8587	103.335
circRNA_03377|Chr04:109087613_109101281_-	86.5439	17.6836	5.36619	2.4239	7.43541	1.04242e-13	2.613e-13	Up	17.6836	0	0	58.3616	0	28.1823
circRNA_02612|Chr03:88895986_88896139_+	25.0121	113.746	0.24111	-2.05224	-7.35116	1.96489e-13	4.91223e-13	Down	97.2599	0	16.4863	25.0121	0	0
circRNA_06607|Chr08:121797216_121797929_-	226.957	108.68	2.28979	1.19521	7.34856	2.00357e-13	4.99564e-13	Up	0	92.1935	16.4863	133.398	46.5882	46.9704
circRNA_02715|Chr03:150181349_150181570_+	117.514	35.3672	3.64325	1.86523	7.34555	2.0491e-13	5.09566e-13	Up	35.3672	0	0	33.3495	46.5882	37.5764
circRNA_00121|Chr01:20459200_20459651_-	139.432	312.617	0.489049	-1.03195	-7.31645	2.54622e-13	6.31517e-13	Down	114.943	115.242	82.4315	83.3737	37.2705	18.7882
circRNA_05649|Chr07:82186328_82186680_-	82.1275	16.4863	5.46218	2.44948	7.28723	3.16393e-13	7.80601e-13	Up	0	0	16.4863	16.6747	37.2705	28.1823
circRNA_00135|Chr01:21539222_21539797_-	0	51.8535	0.0105729	-6.56349	-7.26305	3.78466e-13	9.27662e-13	Down	35.3672	0	16.4863	0	0	0
circRNA_04465|Chr05:187083115_187084054_+	0	51.8535	0.0105729	-6.56349	-7.26305	3.78466e-13	9.27662e-13	Down	35.3672	0	16.4863	0	0	0
circRNA_07882|Chr10:57536352_57541409_+	0	51.8535	0.0105729	-6.56349	-7.26305	3.78466e-13	9.27662e-13	Down	35.3672	0	16.4863	0	0	0
circRNA_11247|Chr15:110487912_110500748_-	0	51.8535	0.0105729	-6.56349	-7.26305	3.78466e-13	9.27662e-13	Down	35.3672	0	16.4863	0	0	0
circRNA_03116|Chr04:19598653_19599257_-	84.088	17.6836	5.21392	2.38237	7.2556	3.99891e-13	9.73828e-13	Up	17.6836	0	0	0	55.9058	28.1823
circRNA_01346|Chr02:28280381_28281714_+	0	51.2549	0.0106964	-6.54674	-7.22351	5.06636e-13	1.229e-12	Down	26.5254	0	24.7295	0	0	0
circRNA_10262|Chr14:10379876_10381480_+	0	51.2549	0.0106964	-6.54674	-7.22351	5.06636e-13	1.229e-12	Down	26.5254	0	24.7295	0	0	0
circRNA_01672|Chr02:68722077_68722364_+	46.8175	0	102.669	6.68186	7.20756	5.69625e-13	1.37119e-12	Up	0	0	0	0	18.6353	28.1823
circRNA_05278|Chr06:139536802_139547050_+	46.8175	0	102.669	6.68186	7.20756	5.69625e-13	1.37119e-12	Up	0	0	0	0	18.6353	28.1823
circRNA_08109|Chr10:158975370_158982032_-	46.8175	0	102.669	6.68186	7.20756	5.69625e-13	1.37119e-12	Up	0	0	0	0	18.6353	28.1823
circRNA_11265|Chr15:112187349_112207589_+	46.8175	0	102.669	6.68186	7.20756	5.69625e-13	1.37119e-12	Up	0	0	0	0	18.6353	28.1823
circRNA_02682|Chr03:131501999_131514059_-	46.7411	0	102.501	6.6795	7.20207	5.93031e-13	1.40948e-12	Up	0	0	0	0	27.9529	18.7882
circRNA_03204|Chr04:36510956_36512495_-	46.7411	0	102.501	6.6795	7.20207	5.93031e-13	1.40948e-12	Up	0	0	0	0	27.9529	18.7882
circRNA_04631|Chr06:5493669_5496099_-	46.7411	0	102.501	6.6795	7.20207	5.93031e-13	1.40948e-12	Up	0	0	0	0	27.9529	18.7882
circRNA_06201|Chr07:226992257_226997198_+	46.7411	0	102.501	6.6795	7.20207	5.93031e-13	1.40948e-12	Up	0	0	0	0	27.9529	18.7882
circRNA_07433|Chr09:123542700_123543204_+	46.7411	0	102.501	6.6795	7.20207	5.93031e-13	1.40948e-12	Up	0	0	0	0	27.9529	18.7882
circRNA_09019|Chr12:33405125_33408287_+	46.7411	0	102.501	6.6795	7.20207	5.93031e-13	1.40948e-12	Up	0	0	0	0	27.9529	18.7882
circRNA_03554|Chr04:161550971_161551152_+	0	50.7328	0.0108064	-6.53197	-7.18879	6.537e-13	1.53428e-12	Down	35.3672	15.3656	0	0	0	0
circRNA_03972|Chr05:13356169_13356327_-	0	50.7328	0.0108064	-6.53197	-7.18879	6.537e-13	1.53428e-12	Down	35.3672	15.3656	0	0	0	0
circRNA_05915|Chr07:125965483_126012453_+	0	50.7328	0.0108064	-6.53197	-7.18879	6.537e-13	1.53428e-12	Down	35.3672	15.3656	0	0	0	0
circRNA_08444|Chr11:55570809_55572982_-	0	50.7328	0.0108064	-6.53197	-7.18879	6.537e-13	1.53428e-12	Down	35.3672	15.3656	0	0	0	0
circRNA_09779|Chr13:110446334_110446500_-	0	50.6562	0.0108228	-6.52979	-7.18367	6.78626e-13	1.58094e-12	Down	17.6836	0	32.9726	0	0	0
circRNA_11395|tig00066201:10704_14239_-	0	50.6562	0.0108228	-6.52979	-7.18367	6.78626e-13	1.58094e-12	Down	17.6836	0	32.9726	0	0	0
circRNA_03337|Chr04:83045989_83050860_-	50.0242	159.451	0.343997	-1.53953	-7.1366	9.56674e-13	2.22043e-12	Down	44.209	115.242	0	50.0242	0	0
circRNA_05626|Chr07:80093543_80093698_+	79.9376	16.4863	5.31654	2.41049	7.12293	1.05655e-12	2.44621e-12	Up	0	0	16.4863	33.3495	46.5882	0
circRNA_05634|Chr07:80433229_80457953_-	16.6747	91.3499	0.200148	-2.32086	-7.11098	1.15225e-12	2.65469e-12	Down	26.5254	15.3656	49.4589	16.6747	0	0
circRNA_01275|Chr02:16122898_16123829_+	0	49.5355	0.0110676	-6.49751	-7.10829	1.17486e-12	2.69686e-12	Down	17.6836	15.3656	16.4863	0	0	0
circRNA_01682|Chr02:71807134_71807646_+	0	49.5355	0.0110676	-6.49751	-7.10829	1.17486e-12	2.69686e-12	Down	17.6836	15.3656	16.4863	0	0	0
circRNA_07138|Chr09:45195835_45247489_+	246.127	126.847	2.12755	1.08919	7.1035	1.21634e-12	2.78189e-12	Up	0	69.1451	57.7021	133.398	0	112.729
circRNA_09075|Chr12:58394635_58399022_+	63.2629	182.216	0.380683	-1.39334	-7.08212	1.41964e-12	3.23898e-12	Down	70.7345	53.7795	57.7021	16.6747	46.5882	0
circRNA_01861|Chr02:105060573_105061694_+	44.857	0	98.3697	6.62014	7.06503	1.60585e-12	3.65053e-12	Up	0	0	0	16.6747	0	28.1823
circRNA_09871|Chr13:122515578_122516108_+	44.857	0	98.3697	6.62014	7.06503	1.60585e-12	3.65053e-12	Up	0	0	0	16.6747	0	28.1823
circRNA_08888|Chr11:134288430_134289333_+	145.926	56.0976	2.85226	1.5121	7.05509	1.72491e-12	3.90704e-12	Up	17.6836	38.4139	0	33.3495	18.6353	93.9409
circRNA_03218|Chr04:37163909_37164905_-	44.6276	0	97.8667	6.61275	7.04809	1.81384e-12	4.08385e-12	Up	0	0	0	16.6747	27.9529	0
circRNA_04097|Chr05:24746262_24746489_-	44.6276	0	97.8667	6.61275	7.04809	1.81384e-12	4.08385e-12	Up	0	0	0	16.6747	27.9529	0
circRNA_10033|Chr13:137792426_137792597_+	44.6276	0	97.8667	6.61275	7.04809	1.81384e-12	4.08385e-12	Up	0	0	0	16.6747	27.9529	0
circRNA_11235|Chr15:105663110_105675317_+	44.6276	0	97.8667	6.61275	7.04809	1.81384e-12	4.08385e-12	Up	0	0	0	16.6747	27.9529	0
circRNA_06011|Chr07:157080821_157081057_-	37.5764	134.285	0.306823	-1.70452	-7.04638	1.83628e-12	4.10977e-12	Down	35.3672	0	98.9178	0	0	37.5764
circRNA_03057|Chr04:12177491_12177647_+	0	48.4148	0.0113238	-6.4645	-7.03183	2.03844e-12	4.53522e-12	Down	17.6836	30.7312	0	0	0	0
circRNA_04382|Chr05:146120708_146120839_+	0	48.4148	0.0113238	-6.4645	-7.03183	2.03844e-12	4.53522e-12	Down	17.6836	30.7312	0	0	0	0
circRNA_05567|Chr07:73717779_73717959_-	0	48.4148	0.0113238	-6.4645	-7.03183	2.03844e-12	4.53522e-12	Down	17.6836	30.7312	0	0	0	0
circRNA_07838|Chr10:37714853_37717747_+	0	48.4148	0.0113238	-6.4645	-7.03183	2.03844e-12	4.53522e-12	Down	17.6836	30.7312	0	0	0	0
circRNA_00474|Chr01:151036554_151040125_+	0	48.3382	0.0113418	-6.46221	-7.02656	2.11683e-12	4.68192e-12	Down	0	15.3656	32.9726	0	0	0
circRNA_05202|Chr06:113994309_113998613_+	0	47.7778	0.0114748	-6.44539	-6.98787	2.79088e-12	6.15106e-12	Down	0	23.0484	24.7295	0	0	0
circRNA_08361|Chr11:28724875_28725676_-	0	47.7778	0.0114748	-6.44539	-6.98787	2.79088e-12	6.15106e-12	Down	0	23.0484	24.7295	0	0	0
circRNA_04653|Chr06:9595850_9596008_+	43.8003	0	96.0523	6.58575	6.98656	2.81711e-12	6.17988e-12	Up	0	0	0	25.0121	0	18.7882
circRNA_11015|Chr15:26234437_26234660_+	43.8003	0	96.0523	6.58575	6.98656	2.81711e-12	6.17988e-12	Up	0	0	0	25.0121	0	18.7882
circRNA_00820|Chr01:223849836_223850009_-	43.6474	0	95.717	6.5807	6.9751	3.05643e-12	6.6815e-12	Up	0	0	0	25.0121	18.6353	0
circRNA_05284|Chr06:139997303_139997504_+	18.6353	93.7828	0.217878	-2.19841	-6.97132	3.13974e-12	6.84768e-12	Down	70.7345	23.0484	0	0	18.6353	0
circRNA_02552|Chr03:66646937_66647105_-	16.6747	89.0702	0.205271	-2.2844	-6.95517	3.52141e-12	7.66232e-12	Down	17.6836	38.4139	32.9726	16.6747	0	0
circRNA_02901|Chr03:215207784_215209540_+	0	47.2175	0.011611	-6.42837	-6.94889	3.68167e-12	7.95579e-12	Down	0	30.7312	16.4863	0	0	0
circRNA_03221|Chr04:37173628_37174666_-	0	47.2175	0.011611	-6.42837	-6.94889	3.68167e-12	7.95579e-12	Down	0	30.7312	16.4863	0	0	0
circRNA_06587|Chr08:116830542_116831199_-	0	47.2175	0.011611	-6.42837	-6.94889	3.68167e-12	7.95579e-12	Down	0	30.7312	16.4863	0	0	0
circRNA_08767|Chr11:112390305_112391998_-	0	47.2175	0.011611	-6.42837	-6.94889	3.68167e-12	7.95579e-12	Down	0	30.7312	16.4863	0	0	0
circRNA_09155|Chr12:115178723_115182669_-	0	47.2175	0.011611	-6.42837	-6.94889	3.68167e-12	7.95579e-12	Down	0	30.7312	16.4863	0	0	0
circRNA_03904|Chr04:235152742_235154292_+	107.063	32.9726	3.56031	1.832	6.92609	4.32627e-12	9.28468e-12	Up	0	0	32.9726	41.6869	46.5882	18.7882
circRNA_03621|Chr04:183946314_184001028_+	177.989	81.3108	2.40019	1.26315	6.7964	1.07266e-11	2.28123e-11	Up	0	15.3656	65.9452	75.0363	46.5882	56.3645
circRNA_05319|Chr06:157220284_157220418_+	74.9998	16.4863	4.98813	2.3185	6.74274	1.55424e-11	3.29794e-11	Up	0	0	16.4863	0	18.6353	56.3645
circRNA_09073|Chr12:58394630_58399022_+	213.375	108.435	2.15763	1.10945	6.71293	1.9075e-11	4.03839e-11	Up	35.3672	15.3656	57.7021	91.7111	55.9058	65.7586
circRNA_02435|Chr03:39131063_39150320_-	86.5439	213.508	0.444451	-1.1699	-6.69145	2.20964e-11	4.66755e-11	Down	70.7345	76.8279	65.9452	58.3616	0	28.1823
circRNA_04104|Chr05:24746543_24746770_-	0	43.0117	0.0127463	-6.29378	-6.64656	3.0002e-11	6.31621e-11	Down	26.5254	0	16.4863	0	0	0
circRNA_04211|Chr05:64938787_64976476_-	0	43.0117	0.0127463	-6.29378	-6.64656	3.0002e-11	6.31621e-11	Down	26.5254	0	16.4863	0	0	0
circRNA_07852|Chr10:40827090_40842219_-	0	42.4131	0.0129262	-6.27356	-6.60203	4.05561e-11	8.45293e-11	Down	17.6836	0	24.7295	0	0	0
circRNA_09226|Chr12:133803106_133888543_+	41.6869	134.362	0.340193	-1.55558	-6.60074	4.09102e-11	8.50787e-11	Down	53.0508	15.3656	65.9452	41.6869	0	0
circRNA_03620|Chr04:183945794_184000520_+	53.1944	155.092	0.376077	-1.4109	-6.59572	4.23209e-11	8.78183e-11	Down	35.3672	53.7795	65.9452	25.0121	0	28.1823
circRNA_09953|Chr13:132322178_132368488_-	103.969	34.1699	3.33628	1.73824	6.58206	4.63984e-11	9.60671e-11	Up	17.6836	0	16.4863	66.699	37.2705	0
circRNA_06179|Chr07:224956274_224986814_-	33.3495	117.99	0.309916	-1.69005	-6.56525	5.19453e-11	1.07315e-10	Down	79.5763	38.4139	0	33.3495	0	0
circRNA_03903|Chr04:234994086_235002537_-	0	41.891	0.0130873	-6.25569	-6.56287	5.27805e-11	1.08327e-10	Down	26.5254	15.3656	0	0	0	0
circRNA_06613|Chr08:126145807_126154798_-	0	41.891	0.0130873	-6.25569	-6.56287	5.27805e-11	1.08327e-10	Down	26.5254	15.3656	0	0	0	0
circRNA_08245|Chr11:4147569_4147936_+	0	41.891	0.0130873	-6.25569	-6.56287	5.27805e-11	1.08327e-10	Down	26.5254	15.3656	0	0	0	0
circRNA_10345|Chr14:26626778_26627140_-	0	41.891	0.0130873	-6.25569	-6.56287	5.27805e-11	1.08327e-10	Down	26.5254	15.3656	0	0	0	0
circRNA_11079|Chr15:53988348_53988554_+	0	41.891	0.0130873	-6.25569	-6.56287	5.27805e-11	1.08327e-10	Down	26.5254	15.3656	0	0	0	0
circRNA_06296|Chr07:251319728_251325140_+	74.9233	17.6836	4.64565	2.21588	6.55661	5.50461e-11	1.12242e-10	Up	17.6836	0	0	0	27.9529	46.9704
circRNA_05401|Chr06:189884611_189893303_-	16.6747	82.5081	0.221597	-2.17399	-6.49356	8.38297e-11	1.70194e-10	Down	17.6836	15.3656	49.4589	16.6747	0	0
circRNA_00688|Chr01:200550426_200550767_+	37.4234	0	82.0681	6.35875	6.48554	8.84144e-11	1.77206e-10	Up	0	0	0	0	18.6353	18.7882
circRNA_01429|Chr02:37976009_37982527_+	37.4234	0	82.0681	6.35875	6.48554	8.84144e-11	1.77206e-10	Up	0	0	0	0	18.6353	18.7882
circRNA_01568|Chr02:56186114_56195646_+	37.4234	0	82.0681	6.35875	6.48554	8.84144e-11	1.77206e-10	Up	0	0	0	0	18.6353	18.7882
circRNA_02152|Chr02:225778685_225798753_-	37.4234	0	82.0681	6.35875	6.48554	8.84144e-11	1.77206e-10	Up	0	0	0	0	18.6353	18.7882
circRNA_03814|Chr04:218737799_218738321_-	37.4234	0	82.0681	6.35875	6.48554	8.84144e-11	1.77206e-10	Up	0	0	0	0	18.6353	18.7882
circRNA_05531|Chr07:72781115_72791528_+	37.4234	0	82.0681	6.35875	6.48554	8.84144e-11	1.77206e-10	Up	0	0	0	0	18.6353	18.7882
circRNA_05952|Chr07:137089089_137186008_+	37.4234	0	82.0681	6.35875	6.48554	8.84144e-11	1.77206e-10	Up	0	0	0	0	18.6353	18.7882
circRNA_07139|Chr09:45195930_45247971_+	37.4234	0	82.0681	6.35875	6.48554	8.84144e-11	1.77206e-10	Up	0	0	0	0	18.6353	18.7882
circRNA_07977|Chr10:109968244_109969273_+	37.4234	0	82.0681	6.35875	6.48554	8.84144e-11	1.77206e-10	Up	0	0	0	0	18.6353	18.7882
circRNA_08321|Chr11:14287603_14287881_-	37.4234	0	82.0681	6.35875	6.48554	8.84144e-11	1.77206e-10	Up	0	0	0	0	18.6353	18.7882
circRNA_09801|Chr13:115286632_115286780_+	37.4234	0	82.0681	6.35875	6.48554	8.84144e-11	1.77206e-10	Up	0	0	0	0	18.6353	18.7882
circRNA_01396|Chr02:34623506_34623714_+	0	40.732	0.0134597	-6.21521	-6.47483	9.49186e-11	1.87641e-10	Down	17.6836	23.0484	0	0	0	0
circRNA_04413|Chr05:157344600_157344820_-	0	40.732	0.0134597	-6.21521	-6.47483	9.49186e-11	1.87641e-10	Down	17.6836	23.0484	0	0	0	0
circRNA_01965|Chr02:153671846_153672809_+	71.6003	16.4863	4.76203	2.25158	6.47261	9.63265e-11	1.89826e-10	Up	0	0	16.4863	25.0121	46.5882	0
circRNA_04627|Chr06:5346435_5350291_+	205.942	106.792	2.11449	1.08031	6.45422	1.08777e-10	2.13913e-10	Up	44.209	46.0967	16.4863	75.0363	74.541	56.3645
circRNA_08723|Chr11:104008181_104009081_-	18.6353	86.0235	0.237531	-2.07382	-6.43573	1.22879e-10	2.4114e-10	Down	53.0508	0	32.9726	0	18.6353	0
circRNA_04184|Chr05:43680018_43680170_+	0	40.095	0.0136735	-6.19247	-6.42577	1.31202e-10	2.56669e-10	Down	0	15.3656	24.7295	0	0	0
circRNA_11239|Chr15:110379627_110386957_+	0	40.095	0.0136735	-6.19247	-6.42577	1.31202e-10	2.56669e-10	Down	0	15.3656	24.7295	0	0	0
circRNA_10256|Chr14:10003833_10004733_-	135.843	56.5813	2.63249	1.39643	6.41349	1.42223e-10	2.77364e-10	Up	0	15.3656	41.2158	33.3495	102.494	0
circRNA_04493|Chr05:196971529_196973495_-	0	39.5347	0.0138673	-6.17217	-6.38221	1.74555e-10	3.39013e-10	Down	0	23.0484	16.4863	0	0	0
circRNA_02922|Chr03:217934466_217941442_-	65.5292	171.731	0.418395	-1.25706	-6.35111	2.13766e-10	4.1431e-10	Down	70.7345	84.5107	16.4863	0	27.9529	37.5764
circRNA_06766|Chr08:182663249_182663724_+	169.805	81.3874	2.28767	1.19388	6.34998	2.15349e-10	4.16518e-10	Up	17.6836	30.7312	32.9726	66.699	27.9529	75.1527
circRNA_05322|Chr06:159046577_159052529_-	69.8691	16.4863	4.64689	2.21627	6.33223	2.41643e-10	4.66417e-10	Up	0	0	16.4863	41.6869	0	28.1823
circRNA_01816|Chr02:90276798_90277190_-	35.4629	0	77.7688	6.28112	6.32076	2.60287e-10	4.92789e-10	Up	0	0	0	16.6747	0	18.7882
circRNA_02075|Chr02:192629800_192630009_-	35.4629	0	77.7688	6.28112	6.32076	2.60287e-10	4.92789e-10	Up	0	0	0	16.6747	0	18.7882
circRNA_02443|Chr03:41144541_41146121_-	35.4629	0	77.7688	6.28112	6.32076	2.60287e-10	4.92789e-10	Up	0	0	0	16.6747	0	18.7882
circRNA_02991|Chr04:4343017_4345532_+	35.4629	0	77.7688	6.28112	6.32076	2.60287e-10	4.92789e-10	Up	0	0	0	16.6747	0	18.7882
circRNA_03912|Chr04:235469959_235474999_-	35.4629	0	77.7688	6.28112	6.32076	2.60287e-10	4.92789e-10	Up	0	0	0	16.6747	0	18.7882
circRNA_04060|Chr05:20991679_20991997_-	35.4629	0	77.7688	6.28112	6.32076	2.60287e-10	4.92789e-10	Up	0	0	0	16.6747	0	18.7882
circRNA_06496|Chr08:51141670_51142830_-	35.4629	0	77.7688	6.28112	6.32076	2.60287e-10	4.92789e-10	Up	0	0	0	16.6747	0	18.7882
circRNA_06814|Chr08:202868333_202868605_+	35.4629	0	77.7688	6.28112	6.32076	2.60287e-10	4.92789e-10	Up	0	0	0	16.6747	0	18.7882
circRNA_07475|Chr09:146195581_146196420_+	35.4629	0	77.7688	6.28112	6.32076	2.60287e-10	4.92789e-10	Up	0	0	0	16.6747	0	18.7882
circRNA_07507|Chr09:159240503_159335351_-	35.4629	0	77.7688	6.28112	6.32076	2.60287e-10	4.92789e-10	Up	0	0	0	16.6747	0	18.7882
circRNA_07514|Chr09:170084313_170090275_+	35.4629	0	77.7688	6.28112	6.32076	2.60287e-10	4.92789e-10	Up	0	0	0	16.6747	0	18.7882
circRNA_07820|Chr10:33488821_33490061_+	35.4629	0	77.7688	6.28112	6.32076	2.60287e-10	4.92789e-10	Up	0	0	0	16.6747	0	18.7882
circRNA_07960|Chr10:99042608_99042750_-	35.4629	0	77.7688	6.28112	6.32076	2.60287e-10	4.92789e-10	Up	0	0	0	16.6747	0	18.7882
circRNA_08505|Chr11:72607624_72607867_-	35.4629	0	77.7688	6.28112	6.32076	2.60287e-10	4.92789e-10	Up	0	0	0	16.6747	0	18.7882
circRNA_08843|Chr11:124744139_124744902_-	35.4629	0	77.7688	6.28112	6.32076	2.60287e-10	4.92789e-10	Up	0	0	0	16.6747	0	18.7882
circRNA_09278|Chr12:147244957_147245125_-	35.4629	0	77.7688	6.28112	6.32076	2.60287e-10	4.92789e-10	Up	0	0	0	16.6747	0	18.7882
circRNA_10037|Chr13:137792430_137792627_+	35.4629	0	77.7688	6.28112	6.32076	2.60287e-10	4.92789e-10	Up	0	0	0	16.6747	0	18.7882
circRNA_11385|Chr15:140094400_140108898_+	35.4629	0	77.7688	6.28112	6.32076	2.60287e-10	4.92789e-10	Up	0	0	0	16.6747	0	18.7882
circRNA_00037|Chr01:5041016_5047529_+	35.31	0	77.4335	6.27489	6.30766	2.83278e-10	5.19574e-10	Up	0	0	0	16.6747	18.6353	0
circRNA_01503|Chr02:48625174_48625442_-	35.31	0	77.4335	6.27489	6.30766	2.83278e-10	5.19574e-10	Up	0	0	0	16.6747	18.6353	0
circRNA_03755|Chr04:210832161_210832319_-	35.31	0	77.4335	6.27489	6.30766	2.83278e-10	5.19574e-10	Up	0	0	0	16.6747	18.6353	0
circRNA_03951|Chr05:10918762_10919525_-	35.31	0	77.4335	6.27489	6.30766	2.83278e-10	5.19574e-10	Up	0	0	0	16.6747	18.6353	0
circRNA_04319|Chr05:127348166_127365898_+	35.31	0	77.4335	6.27489	6.30766	2.83278e-10	5.19574e-10	Up	0	0	0	16.6747	18.6353	0
circRNA_04536|Chr05:202998415_202998806_-	35.31	0	77.4335	6.27489	6.30766	2.83278e-10	5.19574e-10	Up	0	0	0	16.6747	18.6353	0
circRNA_06497|Chr08:51141670_51147374_-	35.31	0	77.4335	6.27489	6.30766	2.83278e-10	5.19574e-10	Up	0	0	0	16.6747	18.6353	0
circRNA_07088|Chr09:20421476_20423662_+	35.31	0	77.4335	6.27489	6.30766	2.83278e-10	5.19574e-10	Up	0	0	0	16.6747	18.6353	0
circRNA_07883|Chr10:57536352_57548630_+	35.31	0	77.4335	6.27489	6.30766	2.83278e-10	5.19574e-10	Up	0	0	0	16.6747	18.6353	0
circRNA_07938|Chr10:91082537_91086061_+	35.31	0	77.4335	6.27489	6.30766	2.83278e-10	5.19574e-10	Up	0	0	0	16.6747	18.6353	0
circRNA_08861|Chr11:128525333_128528212_+	35.31	0	77.4335	6.27489	6.30766	2.83278e-10	5.19574e-10	Up	0	0	0	16.6747	18.6353	0
circRNA_09313|Chr12:151637447_151638588_+	35.31	0	77.4335	6.27489	6.30766	2.83278e-10	5.19574e-10	Up	0	0	0	16.6747	18.6353	0
circRNA_11149|Chr15:83025214_83031424_+	35.31	0	77.4335	6.27489	6.30766	2.83278e-10	5.19574e-10	Up	0	0	0	16.6747	18.6353	0
circRNA_11367|Chr15:139137049_139138842_+	35.31	0	77.4335	6.27489	6.30766	2.83278e-10	5.19574e-10	Up	0	0	0	16.6747	18.6353	0
circRNA_08675|Chr11:95563374_95563749_-	148.192	67.1425	2.42007	1.27505	6.24663	4.19403e-10	7.55247e-10	Up	17.6836	0	49.4589	16.6747	0	131.517
circRNA_01932|Chr02:132716119_132724882_+	79.1103	23.0484	3.76352	1.91208	6.12799	8.89981e-10	1.59958e-09	Up	0	23.0484	0	41.6869	18.6353	18.7882
circRNA_02805|Chr03:186886622_186886824_-	43.8003	129.112	0.371974	-1.42673	-6.06855	1.29068e-09	2.31094e-09	Down	97.2599	15.3656	16.4863	25.0121	0	18.7882
circRNA_08838|Chr11:124343085_124344977_-	74.7704	181.302	0.452198	-1.14497	-6.06056	1.35646e-09	2.4241e-09	Down	26.5254	138.29	16.4863	0	46.5882	28.1823
circRNA_07456|Chr09:131107723_131146887_-	172.822	87.8729	2.15648	1.10868	6.03754	1.56478e-09	2.79108e-09	Up	0	38.4139	49.4589	41.6869	46.5882	84.5468
circRNA_07980|Chr10:111226374_111228392_-	163.122	81.4257	2.1966	1.13527	5.97863	2.25017e-09	3.99841e-09	Up	26.5254	38.4139	16.4863	41.6869	83.8587	37.5764
circRNA_03357|Chr04:95724421_95728443_-	63.4923	15.3656	4.53078	2.17976	5.97455	2.3073e-09	4.09219e-09	Up	0	15.3656	0	16.6747	18.6353	28.1823
circRNA_05137|Chr06:95482860_95483621_-	63.2629	15.3656	4.51441	2.17454	5.95484	2.60319e-09	4.59962e-09	Up	0	15.3656	0	16.6747	46.5882	0
circRNA_06888|Chr08:211374149_211376607_-	164.102	82.5081	2.18081	1.12487	5.95234	2.6434e-09	4.6619e-09	Up	17.6836	15.3656	49.4589	33.3495	93.1763	37.5764
circRNA_05669|Chr07:83284942_83285169_-	66.699	165.975	0.440634	-1.18235	-5.94915	2.69535e-09	4.74463e-09	Down	35.3672	130.607	0	66.699	0	0
circRNA_01421|Chr02:37963348_37964175_+	41.6869	123.317	0.370662	-1.43182	-5.94667	2.73659e-09	4.80822e-09	Down	53.0508	53.7795	16.4863	41.6869	0	0
circRNA_00657|Chr01:197250836_197250985_-	0	34.1699	0.0160445	-5.96177	-5.94395	2.78243e-09	4.84797e-09	Down	17.6836	0	16.4863	0	0	0
circRNA_04250|Chr05:98543916_98568124_-	0	34.1699	0.0160445	-5.96177	-5.94395	2.78243e-09	4.84797e-09	Down	17.6836	0	16.4863	0	0	0
circRNA_06401|Chr08:8027716_8029640_-	0	34.1699	0.0160445	-5.96177	-5.94395	2.78243e-09	4.84797e-09	Down	17.6836	0	16.4863	0	0	0
circRNA_08540|Chr11:74609293_74613075_+	0	34.1699	0.0160445	-5.96177	-5.94395	2.78243e-09	4.84797e-09	Down	17.6836	0	16.4863	0	0	0
circRNA_08874|Chr11:132557194_132557649_-	0	34.1699	0.0160445	-5.96177	-5.94395	2.78243e-09	4.84797e-09	Down	17.6836	0	16.4863	0	0	0
circRNA_09052|Chr12:45769399_45786272_-	0	34.1699	0.0160445	-5.96177	-5.94395	2.78243e-09	4.84797e-09	Down	17.6836	0	16.4863	0	0	0
circRNA_09707|Chr13:96135770_96135938_+	0	34.1699	0.0160445	-5.96177	-5.94395	2.78243e-09	4.84797e-09	Down	17.6836	0	16.4863	0	0	0
circRNA_10469|Chr14:56814082_56814249_-	0	34.1699	0.0160445	-5.96177	-5.94395	2.78243e-09	4.84797e-09	Down	17.6836	0	16.4863	0	0	0
circRNA_01521|Chr02:49858899_49862332_-	106.236	41.891	2.78068	1.47544	5.91074	3.40575e-09	5.88493e-09	Up	26.5254	15.3656	0	50.0242	18.6353	37.5764
circRNA_10866|Chr15:2899905_2900894_-	18.6353	78.379	0.260698	-1.93955	-5.88061	4.08747e-09	7.04994e-09	Down	61.8926	0	16.4863	0	18.6353	0
circRNA_06409|Chr08:8623867_8624809_-	28.1823	97.3516	0.31742	-1.65554	-5.87657	4.18856e-09	7.1979e-09	Down	26.5254	46.0967	24.7295	0	0	28.1823
circRNA_07549|Chr09:186863123_186863471_-	103.029	40.095	2.81754	1.49444	5.87638	4.1933e-09	7.19289e-09	Up	0	15.3656	24.7295	0	37.2705	65.7586
circRNA_02689|Chr03:136105920_136111287_+	159.583	80.1901	2.18206	1.12569	5.87323	4.27396e-09	7.31788e-09	Up	0	30.7312	49.4589	75.0363	0	84.5468
circRNA_09225|Chr12:133802024_133888204_-	66.699	164.402	0.444848	-1.16861	-5.86608	4.46225e-09	7.62639e-09	Down	114.943	0	49.4589	66.699	0	0
circRNA_00655|Chr01:197140112_197142268_-	0	33.0492	0.0165886	-5.91366	-5.84702	5.00443e-09	8.50663e-09	Down	17.6836	15.3656	0	0	0	0
circRNA_04064|Chr05:21077811_21083008_+	0	33.0492	0.0165886	-5.91366	-5.84702	5.00443e-09	8.50663e-09	Down	17.6836	15.3656	0	0	0	0
circRNA_06261|Chr07:238598332_238598519_-	0	33.0492	0.0165886	-5.91366	-5.84702	5.00443e-09	8.50663e-09	Down	17.6836	15.3656	0	0	0	0
circRNA_07370|Chr09:103987897_103989471_+	0	33.0492	0.0165886	-5.91366	-5.84702	5.00443e-09	8.50663e-09	Down	17.6836	15.3656	0	0	0	0
circRNA_08790|Chr11:119412722_119420360_-	0	33.0492	0.0165886	-5.91366	-5.84702	5.00443e-09	8.50663e-09	Down	17.6836	15.3656	0	0	0	0
circRNA_05877|Chr07:119514006_119514317_-	103.335	40.732	2.78172	1.47597	5.83103	5.50868e-09	9.31324e-09	Up	17.6836	23.0484	0	0	0	103.335
circRNA_07339|Chr09:93845087_93846112_+	162.447	83.782	2.126	1.08814	5.76548	8.14263e-09	1.36193e-08	Up	53.0508	30.7312	0	50.0242	37.2705	75.1527
circRNA_08176|Chr10:182347404_182347559_+	80.0906	26.5254	3.3107	1.72714	5.75089	8.87756e-09	1.48222e-08	Up	26.5254	0	0	33.3495	27.9529	18.7882
circRNA_00269|Chr01:51127658_51140279_-	0	31.8519	0.0172122	-5.86043	-5.74118	9.40197e-09	1.55323e-08	Down	0	15.3656	16.4863	0	0	0
circRNA_01150|Chr01:257741313_257741549_-	0	31.8519	0.0172122	-5.86043	-5.74118	9.40197e-09	1.55323e-08	Down	0	15.3656	16.4863	0	0	0
circRNA_01904|Chr02:119537036_119538828_+	0	31.8519	0.0172122	-5.86043	-5.74118	9.40197e-09	1.55323e-08	Down	0	15.3656	16.4863	0	0	0
circRNA_02231|Chr03:11847548_11900202_+	0	31.8519	0.0172122	-5.86043	-5.74118	9.40197e-09	1.55323e-08	Down	0	15.3656	16.4863	0	0	0
circRNA_02755|Chr03:173031051_173123329_-	0	31.8519	0.0172122	-5.86043	-5.74118	9.40197e-09	1.55323e-08	Down	0	15.3656	16.4863	0	0	0
circRNA_03009|Chr04:5015265_5015423_-	0	31.8519	0.0172122	-5.86043	-5.74118	9.40197e-09	1.55323e-08	Down	0	15.3656	16.4863	0	0	0
circRNA_03234|Chr04:39477638_39479632_-	0	31.8519	0.0172122	-5.86043	-5.74118	9.40197e-09	1.55323e-08	Down	0	15.3656	16.4863	0	0	0
circRNA_05286|Chr06:140874138_140882756_-	0	31.8519	0.0172122	-5.86043	-5.74118	9.40197e-09	1.55323e-08	Down	0	15.3656	16.4863	0	0	0
circRNA_09056|Chr12:49094808_49096695_+	0	31.8519	0.0172122	-5.86043	-5.74118	9.40197e-09	1.55323e-08	Down	0	15.3656	16.4863	0	0	0
circRNA_10186|Chr14:3216420_3224878_+	0	31.8519	0.0172122	-5.86043	-5.74118	9.40197e-09	1.55323e-08	Down	0	15.3656	16.4863	0	0	0
circRNA_10843|Chr15:598635_598764_+	0	31.8519	0.0172122	-5.86043	-5.74118	9.40197e-09	1.55323e-08	Down	0	15.3656	16.4863	0	0	0
circRNA_05514|Chr07:70052127_70056361_+	18.7882	76.583	0.269001	-1.89432	-5.72196	1.05303e-08	1.72148e-08	Down	35.3672	0	41.2158	0	0	18.7882
circRNA_03695|Chr04:196186322_196186682_+	89.2553	32.9726	2.96812	1.56955	5.66995	1.4284e-08	2.33107e-08	Up	0	0	32.9726	33.3495	55.9058	0
circRNA_01339|Chr02:26204567_26239086_+	127.061	58.8994	2.36539	1.24208	5.66665	1.45616e-08	2.37226e-08	Up	17.6836	0	41.2158	33.3495	27.9529	65.7586
circRNA_04491|Chr05:196964331_196965594_-	124.718	57.2566	2.38839	1.25604	5.66352	1.48298e-08	2.41177e-08	Up	26.5254	30.7312	0	50.0242	55.9058	18.7882
circRNA_01994|Chr02:163368323_163368567_+	46.9704	127.522	0.403868	-1.30805	-5.64432	1.65836e-08	2.69232e-08	Down	26.5254	84.5107	16.4863	0	0	46.9704
circRNA_00118|Chr01:20457793_20459651_-	28.1823	93.7828	0.329499	-1.60166	-5.63246	1.77659e-08	2.87434e-08	Down	70.7345	23.0484	0	0	0	28.1823
circRNA_00837|Chr01:226316928_226317092_+	61.5318	16.4863	4.09239	2.03294	5.62679	1.83594e-08	2.96526e-08	Up	0	0	16.4863	33.3495	0	28.1823
circRNA_03243|Chr04:39495913_39496504_-	99.1081	40.095	2.71031	1.43846	5.60165	2.12323e-08	3.4234e-08	Up	0	15.3656	24.7295	33.3495	0	65.7586
circRNA_07827|Chr10:35680214_35682813_-	28.1823	93.0693	0.332025	-1.59064	-5.58304	2.36353e-08	3.80432e-08	Down	35.3672	0	57.7021	0	0	28.1823
circRNA_07193|Chr09:55283721_55284376_+	84.088	30.7312	3.00024	1.58508	5.54284	2.97604e-08	4.77386e-08	Up	0	30.7312	0	0	55.9058	28.1823
circRNA_05548|Chr07:73307878_73308850_-	62.5885	17.6836	3.88083	1.95636	5.53411	3.12818e-08	5.00509e-08	Up	17.6836	0	0	25.0121	0	37.5764
circRNA_08351|Chr11:19346009_19351758_+	62.5885	17.6836	3.88083	1.95636	5.53411	3.12818e-08	5.00509e-08	Up	17.6836	0	0	25.0121	0	37.5764
circRNA_02799|Chr03:183701882_183702703_-	140.489	70.7345	2.17777	1.12285	5.49927	3.8137e-08	6.07606e-08	Up	70.7345	0	0	75.0363	37.2705	28.1823
circRNA_00555|Chr01:180880586_180892815_+	90.5414	35.3672	2.80703	1.48904	5.49389	3.9318e-08	6.24305e-08	Up	35.3672	0	0	25.0121	27.9529	37.5764
circRNA_00085|Chr01:14756436_14763002_-	18.6353	71.9469	0.284004	-1.81602	-5.38943	7.06819e-08	1.11853e-07	Down	0	30.7312	41.2158	0	18.6353	0
circRNA_01277|Chr02:16122898_16146796_+	106.389	47.2175	2.47055	1.30483	5.38806	7.12215e-08	1.12518e-07	Up	0	30.7312	16.4863	50.0242	0	56.3645
circRNA_02569|Chr03:74693690_74694166_+	60.3221	17.6836	3.7403	1.90315	5.33417	9.59835e-08	1.5113e-07	Up	17.6836	0	0	41.6869	18.6353	0
circRNA_07904|Chr10:69737984_69739398_+	56.2116	15.3656	4.01123	2.00405	5.32817	9.92057e-08	1.55942e-07	Up	0	15.3656	0	0	18.6353	37.5764
circRNA_05508|Chr06:210752163_210757612_+	68.6595	23.0484	3.26634	1.70767	5.28238	1.27514e-07	2.00105e-07	Up	0	23.0484	0	50.0242	18.6353	0
circRNA_04591|Chr06:404474_406881_-	87.6006	35.3672	2.71586	1.44141	5.2744	1.33192e-07	2.08668e-07	Up	35.3672	0	0	50.0242	0	37.5764
circRNA_07789|Chr10:26072934_26073373_-	139.432	73.1442	2.09018	1.06363	5.24314	1.57865e-07	2.46092e-07	Up	17.6836	30.7312	24.7295	83.3737	37.2705	18.7882
circRNA_10858|Chr15:2070041_2071208_+	117.59	57.2183	2.2534	1.1721	5.20696	1.91962e-07	2.98255e-07	Up	17.6836	23.0484	16.4863	33.3495	37.2705	46.9704
circRNA_05167|Chr06:102018355_102021009_+	56.1352	135.037	0.45581	-1.1335	-5.18788	2.127e-07	3.29931e-07	Down	79.5763	30.7312	24.7295	0	27.9529	28.1823
circRNA_10774|Chr14:135556553_135557055_-	73.0393	26.5254	3.01922	1.59418	5.18724	2.13438e-07	3.3053e-07	Up	26.5254	0	0	16.6747	0	56.3645
circRNA_07156|Chr09:54743726_54744808_-	128.792	65.9452	2.14144	1.09858	5.17316	2.3017e-07	3.55855e-07	Up	0	0	65.9452	16.6747	74.541	37.5764
circRNA_09407|Chr13:11679406_11680186_+	16.6747	64.9394	0.281548	-1.82855	-5.14434	2.68466e-07	4.14382e-07	Down	26.5254	38.4139	0	16.6747	0	0
circRNA_05673|Chr07:83285004_83285231_+	25.0121	80.2667	0.341677	-1.54929	-5.08629	3.6514e-07	5.60836e-07	Down	17.6836	46.0967	16.4863	25.0121	0	0
circRNA_00344|Chr01:113563815_113580018_-	106.91	50.7328	2.31064	1.20829	5.08604	3.65624e-07	5.60663e-07	Up	35.3672	15.3656	0	41.6869	65.2234	0
circRNA_03717|Chr04:201423856_201428966_+	53.1944	15.3656	3.79593	1.92445	5.04646	4.50078e-07	6.89045e-07	Up	0	15.3656	0	25.0121	0	28.1823
circRNA_11378|Chr15:139388966_139390419_+	52.965	15.3656	3.77956	1.91822	5.02468	5.04282e-07	7.69521e-07	Up	0	15.3656	0	25.0121	27.9529	0
circRNA_04056|Chr05:20405171_20405822_-	100.763	47.2175	2.33991	1.22645	4.99605	5.8518e-07	8.91522e-07	Up	0	30.7312	16.4863	16.6747	55.9058	28.1823
circRNA_06581|Chr08:115696666_115706467_+	18.7882	67.1425	0.306823	-1.70452	-4.98204	6.29162e-07	9.56204e-07	Down	17.6836	0	49.4589	0	0	18.7882
circRNA_07809|Chr10:32864179_32867110_-	18.7882	67.1425	0.306823	-1.70452	-4.98204	6.29162e-07	9.56204e-07	Down	17.6836	0	49.4589	0	0	18.7882
circRNA_08482|Chr11:67111506_67111727_+	54.2511	16.4863	3.60816	1.85126	4.96511	6.86623e-07	1.04101e-06	Up	0	0	16.4863	16.6747	0	37.5764
circRNA_09390|Chr12:166255928_166264436_-	37.5764	100.23	0.411072	-1.28254	-4.92793	8.3106e-07	1.25797e-06	Down	44.209	23.0484	32.9726	0	0	37.5764
circRNA_10956|Chr15:13363808_13364417_+	91.6745	41.891	2.39954	1.26276	4.87563	1.08464e-06	1.63917e-06	Up	26.5254	15.3656	0	16.6747	18.6353	56.3645
circRNA_07832|Chr10:37361024_37361684_-	18.6353	65.4614	0.312141	-1.67973	-4.86859	1.12396e-06	1.69586e-06	Down	17.6836	23.0484	24.7295	0	18.6353	0
circRNA_05038|Chr06:72976697_73005270_-	74.9233	30.7312	2.67325	1.41859	4.81955	1.43882e-06	2.16053e-06	Up	0	30.7312	0	0	27.9529	46.9704
circRNA_01021|Chr01:255454959_255455853_+	18.7882	64.9394	0.317232	-1.65639	-4.80114	1.57769e-06	2.36527e-06	Down	26.5254	38.4139	0	0	0	18.7882
circRNA_08443|Chr11:53978569_53978812_-	37.2705	97.7971	0.417869	-1.25888	-4.79757	1.60604e-06	2.40395e-06	Down	0	15.3656	82.4315	0	37.2705	0
circRNA_00359|Chr01:113664555_113668644_-	54.2511	17.6836	3.36386	1.75012	4.77685	1.78066e-06	2.65685e-06	Up	17.6836	0	0	16.6747	0	37.5764
circRNA_08774|Chr11:114494103_114496255_-	54.0982	17.6836	3.35438	1.74605	4.76237	1.91333e-06	2.84128e-06	Up	17.6836	0	0	16.6747	18.6353	18.7882
circRNA_02163|Chr02:226714285_226800835_+	53.9453	17.6836	3.3449	1.74196	4.74787	2.05571e-06	3.0479e-06	Up	17.6836	0	0	16.6747	37.2705	0
circRNA_05895|Chr07:122443483_122445274_-	79.9376	35.3672	2.47828	1.30934	4.68271	2.83107e-06	4.19088e-06	Up	35.3672	0	0	33.3495	46.5882	0
circRNA_04163|Chr05:40896474_40897106_-	25.0121	74.9402	0.365962	-1.45023	-4.68002	2.86845e-06	4.23953e-06	Down	44.209	30.7312	0	25.0121	0	0
circRNA_08104|Chr10:158745672_158750954_+	25.0121	74.8636	0.366337	-1.44876	-4.67407	2.95293e-06	4.35755e-06	Down	26.5254	15.3656	32.9726	25.0121	0	0
circRNA_08022|Chr10:131479870_131480025_+	37.2705	94.5115	0.432396	-1.20957	-4.57045	4.86677e-06	7.13692e-06	Down	17.6836	76.8279	0	0	37.2705	0
circRNA_09603|Chr13:84487221_84489478_+	51.9847	17.6836	3.22334	1.68856	4.5599	5.11788e-06	7.49346e-06	Up	17.6836	0	0	33.3495	18.6353	0
circRNA_07720|Chr10:11433750_11434268_-	105.103	55.4606	2.07793	1.05514	4.52216	6.12117e-06	8.93463e-06	Up	0	30.7312	24.7295	58.3616	27.9529	18.7882
circRNA_08791|Chr11:119418031_119420360_-	18.6353	60.6953	0.336652	-1.57067	-4.46725	7.92329e-06	1.15471e-05	Down	44.209	0	16.4863	0	18.6353	0
circRNA_10484|Chr14:59483324_59486415_-	46.8175	15.3656	3.34088	1.74023	4.41997	9.87169e-06	1.4276e-05	Up	0	15.3656	0	0	18.6353	28.1823
circRNA_06563|Chr08:108618720_108619076_-	16.6747	56.021	0.326369	-1.61542	-4.37993	1.18719e-05	1.70897e-05	Down	0	23.0484	32.9726	16.6747	0	0
circRNA_04337|Chr05:133007427_133007915_+	18.7882	59.5746	0.345799	-1.53199	-4.34585	1.38736e-05	1.99102e-05	Down	44.209	15.3656	0	0	0	18.7882
circRNA_03317|Chr04:61974065_61977627_-	46.5882	105.556	0.48394	-1.0471	-4.30086	1.70137e-05	2.43794e-05	Down	17.6836	38.4139	49.4589	0	46.5882	0
circRNA_02250|Chr03:13584331_13585922_+	85.4872	43.0117	2.17929	1.12386	4.29238	1.76765e-05	2.52906e-05	Up	26.5254	0	16.4863	66.699	0	18.7882
circRNA_00050|Chr01:6648433_6649794_+	70.7729	32.9726	2.3535	1.23481	4.20925	2.56215e-05	3.64912e-05	Up	0	0	32.9726	33.3495	18.6353	18.7882
circRNA_08450|Chr11:59314434_59320154_-	18.7882	57.7786	0.356548	-1.48783	-4.1884	2.80931e-05	3.98904e-05	Down	17.6836	15.3656	24.7295	0	0	18.7882
circRNA_09312|Chr12:151637447_151637791_+	68.8124	31.8519	2.36882	1.24417	4.17521	2.97709e-05	4.21455e-05	Up	0	15.3656	16.4863	50.0242	0	18.7882
circRNA_08855|Chr11:128366376_128366940_+	33.3495	81.464	0.448874	-1.15562	-4.09197	4.27723e-05	6.04601e-05	Down	35.3672	46.0967	0	33.3495	0	0
circRNA_02081|Chr02:200176412_200179385_-	65.6057	30.7312	2.3408	1.227	4.03246	5.51954e-05	7.76702e-05	Up	0	30.7312	0	0	18.6353	46.9704
circRNA_10524|Chr14:70268163_70270641_-	35.31	83.782	0.462113	-1.11368	-4.02839	5.61604e-05	7.891e-05	Down	53.0508	30.7312	0	16.6747	18.6353	0
circRNA_01605|Chr02:59285148_59288937_+	65.5292	30.7312	2.33807	1.22532	4.02576	5.67917e-05	7.94407e-05	Up	0	30.7312	0	0	27.9529	37.5764
circRNA_10758|Chr14:133552268_133552438_-	44.6276	16.4863	2.96812	1.56955	4.00895	6.0989e-05	8.49328e-05	Up	0	0	16.4863	16.6747	27.9529	0
circRNA_03488|Chr04:145636323_145637857_+	54.0982	23.0484	2.57361	1.3638	3.97456	7.05093e-05	9.79007e-05	Up	0	23.0484	0	16.6747	18.6353	18.7882
circRNA_09018|Chr12:33405121_33408287_+	28.1823	71.4631	0.432409	-1.20953	-3.974	7.06763e-05	9.79878e-05	Down	17.6836	53.7795	0	0	0	28.1823
circRNA_03735|Chr04:205147373_205153010_+	53.9453	23.0484	2.56634	1.35971	3.95986	7.49952e-05	0.000103822	Up	0	23.0484	0	16.6747	37.2705	0
circRNA_04395|Chr05:152832453_152832638_-	18.6353	54.9002	0.372188	-1.4259	-3.95499	7.65366e-05	0.000105801	Down	0	38.4139	16.4863	0	18.6353	0
circRNA_00896|Chr01:237463473_237464300_+	44.857	17.6836	2.78138	1.4758	3.84108	0.000122495	0.000167362	Up	17.6836	0	0	16.6747	0	28.1823
circRNA_09910|Chr13:128369682_128393121_-	81.0708	44.209	2.01073	1.00772	3.82427	0.000131159	0.000178681	Up	44.209	0	0	25.0121	37.2705	18.7882
circRNA_01522|Chr02:49863927_49879099_-	51.9847	23.0484	2.47307	1.3063	3.76926	0.00016373	0.000221926	Up	0	23.0484	0	33.3495	18.6353	0
circRNA_05312|Chr06:148690307_148695211_+	51.9847	23.0484	2.47307	1.3063	3.76926	0.00016373	0.000221926	Up	0	23.0484	0	33.3495	18.6353	0
circRNA_02899|Chr03:215095750_215095900_-	54.0982	24.7295	2.39866	1.26223	3.74389	0.000181192	0.000244362	Up	0	0	24.7295	16.6747	18.6353	18.7882
circRNA_06050|Chr07:177813382_177829150_-	43.8003	17.6836	2.71586	1.44141	3.72927	0.000192036	0.000258431	Up	17.6836	0	0	25.0121	0	18.7882
circRNA_09235|Chr12:136794965_136795237_-	43.8003	17.6836	2.71586	1.44141	3.72927	0.000192036	0.000258431	Up	17.6836	0	0	25.0121	0	18.7882
circRNA_08775|Chr11:114612324_114667359_-	65.2234	33.0492	2.16393	1.11365	3.72168	0.000197898	0.000265749	Up	17.6836	15.3656	0	0	65.2234	0
circRNA_02588|Chr03:79581370_79586667_-	18.6353	51.8535	0.394056	-1.34353	-3.6737	0.000239062	0.000319202	Down	35.3672	0	16.4863	0	18.6353	0
circRNA_08972|Chr12:9933419_9934418_+	18.6353	51.8535	0.394056	-1.34353	-3.6737	0.000239062	0.000319202	Down	35.3672	0	16.4863	0	18.6353	0
circRNA_09904|Chr13:128237735_128242185_-	18.6353	51.8535	0.394056	-1.34353	-3.6737	0.000239062	0.000319202	Down	35.3672	0	16.4863	0	18.6353	0
circRNA_07790|Chr10:26407598_26408129_+	33.3495	75.9843	0.481245	-1.05516	-3.67175	0.000240895	0.000320738	Down	26.5254	0	49.4589	33.3495	0	0
circRNA_05565|Chr07:73717779_73717933_-	18.7882	51.8535	0.39729	-1.33174	-3.64891	0.000263354	0.000350145	Down	35.3672	0	16.4863	0	0	18.7882
circRNA_11060|Chr15:49549944_49551234_-	33.3495	75.3857	0.485066	-1.04375	-3.62486	0.000289114	0.000383852	Down	17.6836	0	57.7021	33.3495	0	0
circRNA_05552|Chr07:73375982_73376712_+	28.1823	67.1425	0.460234	-1.11956	-3.62147	0.000292935	0.000388377	Down	17.6836	0	49.4589	0	0	28.1823
circRNA_05453|Chr06:202102656_202103564_+	18.7882	51.2549	0.40193	-1.31498	-3.59256	0.000327442	0.000432905	Down	26.5254	0	24.7295	0	0	18.7882
circRNA_10503|Chr14:63356976_63359404_+	16.6747	47.2175	0.38722	-1.36878	-3.55589	0.000376706	0.000496639	Down	0	30.7312	16.4863	16.6747	0	0
circRNA_02198|Chr03:7215107_7215333_+	18.7882	50.7328	0.406066	-1.30021	-3.54313	0.000395411	0.000520205	Down	35.3672	15.3656	0	0	0	18.7882
circRNA_05245|Chr06:126715237_126715810_-	18.7882	50.7328	0.406066	-1.30021	-3.54313	0.000395411	0.000520205	Down	35.3672	15.3656	0	0	0	18.7882
circRNA_10173|Chr14:928838_929139_-	62.2826	33.0492	2.06637	1.0471	3.45911	0.00054196	0.000702679	Up	17.6836	15.3656	0	25.0121	37.2705	0
circRNA_10896|Chr15:5591179_5592755_+	18.7882	49.5738	0.41556	-1.26687	-3.43238	0.00059831	0.000773606	Down	26.5254	23.0484	0	0	0	18.7882
circRNA_03720|Chr04:201428345_201434109_+	60.3221	31.8519	2.07655	1.05419	3.42307	0.000619181	0.000798395	Up	0	15.3656	16.4863	41.6869	18.6353	0
circRNA_00789|Chr01:220500907_220501086_+	37.4234	15.3656	2.67052	1.41712	3.4033	0.000665776	0.000857301	Up	0	15.3656	0	0	18.6353	18.7882
circRNA_07195|Chr09:55286042_55288094_+	61.5318	32.9726	2.04619	1.03294	3.40005	0.00067373	0.000866356	Up	0	0	32.9726	33.3495	0	28.1823
circRNA_06134|Chr07:217891817_217892161_+	18.6353	47.2175	0.432747	-1.20841	-3.22775	0.0012477	0.00158491	Down	0	30.7312	16.4863	0	18.6353	0
circRNA_03926|Chr05:5665025_5672713_+	37.4234	16.4863	2.48898	1.31555	3.21549	0.00130224	0.00165196	Up	0	0	16.4863	0	18.6353	18.7882
circRNA_02142|Chr02:225601977_225619620_+	37.4234	17.6836	2.32046	1.21441	3.02076	0.00252143	0.00316864	Up	17.6836	0	0	0	18.6353	18.7882
circRNA_03941|Chr05:9298049_9299060_+	35.4629	16.4863	2.35859	1.23792	2.9853	0.00283297	0.00354592	Up	0	0	16.4863	16.6747	0	18.7882
circRNA_04119|Chr05:27371860_27373610_+	35.31	16.4863	2.34842	1.23169	2.96706	0.0030066	0.00375825	Up	0	0	16.4863	16.6747	18.6353	0
circRNA_04575|Chr05:210788607_210789204_+	35.31	17.6836	2.18941	1.13054	2.77157	0.00557865	0.00687278	Up	17.6836	0	0	16.6747	18.6353	0
circRNA_10981|Chr15:16271504_16272331_-	18.7882	41.891	0.491773	-1.02394	-2.6598	0.00781871	0.00950787	Down	26.5254	15.3656	0	0	0	18.7882

## Sheet: TT-vs-T
circRNA	case_value	control_value	FoldChange	log2FoldChange	z-score	pValue	qValue	Regulation	Expression_T-1	Expression_T-2	Expression_T-3	Expression_TT-1	Expression_TT-2	Expression_TT-3
circRNA_02615|Chr03:89390209_89421500_-	2486.59	0	5296.88	12.3709	36.0171	4.51689e-284	4.26395e-281	Up	0	0	0	858.749	819.951	807.892
circRNA_01643|Chr02:64750682_64802808_+	1427.9	4009.37	0.379322	-1.39851	-33.7726	4.97579e-250	2.34857e-247	Down	1029.22	1711.25	1268.9	0	0	1427.9
circRNA_02371|Chr03:29477381_29514816_-	925.448	3036.17	0.324647	-1.62306	-32.7375	4.5713e-235	1.43844e-232	Down	1029.22	786.484	1220.46	925.448	0	0
circRNA_08489|Chr11:71054073_71119156_+	0	1843.65	0.000288853	-11.7574	-31.7636	2.06255e-221	3.8941e-219	Down	650.961	1192.69	0	0	0	0
circRNA_04527|Chr05:202756257_202767469_-	1619.06	0	3448.89	11.7519	30.7341	1.99175e-207	3.13369e-205	Up	0	0	0	0	745.41	873.65
circRNA_10269|Chr14:11241651_11299473_-	0	1405.96	0.000378777	-11.3664	-28.6952	4.38313e-181	5.91096e-179	Down	826.897	579.06	0	0	0	0
circRNA_08560|Chr11:74928370_74947624_-	1148.2	0	2445.87	11.2561	27.0137	1.01895e-160	1.06876e-158	Up	0	0	0	650.315	0	497.887
circRNA_08992|Chr12:11272140_11322653_+	1239.66	362.993	3.6374	1.86291	23.7005	3.56174e-124	3.36229e-122	Up	0	362.993	0	425.206	344.752	469.704
circRNA_04220|Chr05:72913902_72963888_-	310.005	1171.61	0.28182	-1.82715	-22.0289	1.52248e-107	1.30657e-105	Down	360.668	423.492	387.449	0	0	310.005
circRNA_10971|Chr15:14747387_14797190_-	0	689.012	0.00077291	-10.3374	-21.835	1.07985e-105	8.49484e-104	Down	466.229	0	222.783	0	0	0
circRNA_07166|Chr09:54891260_54891385_-	195.046	915.55	0.226903	-2.13985	-21.5919	2.14205e-103	1.55546e-101	Down	272.7	371.635	271.214	91.7111	0	103.335
circRNA_08374|Chr11:30433782_30503529_-	0	636	0.000837334	-10.2219	-21.1631	2.08946e-99	1.40889e-97	Down	0	267.923	368.077	0	0	0
circRNA_00768|Chr01:216466071_216529290_-	319.399	1109.72	0.306554	-1.70578	-20.44	7.37356e-93	4.64043e-91	Down	0	596.345	513.37	0	0	319.399
circRNA_01342|Chr02:27037032_27051453_-	0	529.508	0.00100573	-9.95753	-19.6925	2.49946e-86	1.47468e-84	Down	105.561	259.281	164.666	0	0	0
circRNA_05922|Chr07:127176047_127247411_+	0	487.226	0.00109301	-9.83747	-19.0545	6.03257e-81	3.34985e-79	Down	184.732	302.494	0	0	0	0
circRNA_10483|Chr14:59248020_59336090_-	204.988	808.042	0.270197	-1.88792	-18.6942	5.52385e-78	2.89695e-76	Down	413.448	181.496	213.097	0	204.988	0
circRNA_03906|Chr04:235405112_235471918_-	0	448.831	0.00118651	-9.71906	-18.4427	5.96855e-76	2.96543e-74	Down	255.106	0	193.724	0	0	0
circRNA_09064|Chr12:51666035_51667724_+	359.962	0	766.782	9.58267	17.2079	2.31567e-66	1.093e-64	Up	0	0	0	108.386	251.576	0
circRNA_09595|Chr13:82633585_82677538_-	0	332.274	0.00160272	-9.28526	-16.3435	4.83883e-60	2.17517e-58	Down	219.919	112.355	0	0	0	0
circRNA_06414|Chr08:11403885_11406199_+	563.894	164.995	3.64009	1.86397	15.9739	1.94328e-57	8.33844e-56	Up	61.5774	25.9281	77.4898	216.772	55.9058	291.217
circRNA_08313|Chr11:14094882_14103390_-	225.109	727.47	0.329582	-1.60129	-15.8107	2.62467e-56	1.07726e-54	Down	237.513	354.35	135.607	225.109	0	0
circRNA_10965|Chr15:14587628_14675489_+	112.729	502.144	0.239108	-2.06427	-15.6207	5.26153e-55	1.98675e-53	Down	202.326	164.211	135.607	0	0	112.729
circRNA_00651|Chr01:197074719_197100487_-	458.399	1110.04	0.439834	-1.18497	-15.5479	1.64304e-54	5.74455e-53	Down	316.684	328.422	464.939	0	232.941	225.458
circRNA_00650|Chr01:197074421_197100223_-	441.522	1071.72	0.43879	-1.1884	-15.3111	6.44305e-53	2.17223e-51	Down	0	509.918	561.801	0	0	441.522
circRNA_07138|Chr09:45195835_45247489_+	246.127	0	524.294	9.03423	14.7522	2.97925e-49	9.69796e-48	Up	0	0	0	133.398	0	112.729
circRNA_01012|Chr01:254064084_254064607_-	1189.83	631.35	2.00724	1.00522	14.5449	6.28917e-48	1.97899e-46	Up	211.123	129.64	290.587	450.218	307.482	432.128
circRNA_10439|Chr14:47322301_47323240_+	334.329	71.5367	4.97772	2.31549	14.1231	2.7353e-45	8.32944e-44	Up	17.5935	34.5707	19.3724	25.0121	83.8587	225.458
circRNA_07561|Chr09:188936227_188938294_-	219.905	0	468.437	8.87171	14.0845	4.73217e-45	1.39599e-43	Up	0	0	0	116.723	18.6353	84.5468
circRNA_07380|Chr09:104635021_104635179_-	0	225.956	0.00235685	-8.72893	-13.9522	3.05246e-44	8.73188e-43	Down	87.9677	60.4988	77.4898	0	0	0
circRNA_00028|Chr01:3809970_3810882_+	943.711	469.317	2.1417	1.09876	13.9231	4.5838e-44	1.27268e-42	Up	123.155	181.496	164.666	475.23	149.082	319.399
circRNA_01458|Chr02:41917206_41951432_+	0	209.406	0.00254311	-8.61919	-13.5172	1.23755e-41	3.33786e-40	Down	70.3742	51.8561	87.176	0	0	0
circRNA_05651|Chr07:82535068_82566247_+	18.6353	214.918	0.0923523	-3.43671	-13.4058	5.59065e-41	1.46599e-39	Down	70.3742	86.4268	58.1173	0	18.6353	0
circRNA_05302|Chr06:144106560_144138689_+	193.989	0	413.232	8.69081	13.3714	8.88167e-41	2.26603e-39	Up	0	0	0	100.048	0	93.9409
circRNA_05173|Chr06:103353295_103372666_+	0	203.705	0.00261429	-8.57937	-13.3622	1.00496e-40	2.49654e-39	Down	0	77.7842	125.921	0	0	0
circRNA_04340|Chr05:134405066_134439299_-	582.669	232.239	2.67222	1.41804	13.3478	1.21968e-40	2.95226e-39	Up	131.952	51.8561	48.4311	208.434	186.353	187.882
circRNA_03832|Chr04:220012977_220030240_+	0	197.976	0.00268994	-8.53821	-13.2036	8.36e-40	1.97296e-38	Down	149.545	0	48.4311	0	0	0
circRNA_01763|Chr02:80359807_80368188_+	0	196.295	0.00271298	-8.52591	-13.1565	1.56093e-39	3.50838e-38	Down	70.3742	0	125.921	0	0	0
circRNA_06300|Chr07:251415780_251443955_+	0	192.121	0.00277192	-8.4949	-13.0384	7.39712e-39	1.62393e-37	Down	70.3742	34.5707	87.176	0	0	0
circRNA_01882|Chr02:108193102_108223319_+	0	191.834	0.00277607	-8.49274	-13.0302	8.23436e-39	1.76665e-37	Down	96.7645	95.0695	0	0	0	0
circRNA_00121|Chr01:20459200_20459651_-	139.432	468.736	0.316826	-1.65824	-13.008	1.10202e-38	2.31178e-37	Down	149.545	164.211	154.98	83.3737	37.2705	18.7882
circRNA_08887|Chr11:133595784_133596292_+	591.454	251.611	2.50367	1.32404	12.7635	2.62075e-37	5.26381e-36	Up	131.952	51.8561	67.8036	58.3616	288.847	244.246
circRNA_03364|Chr04:96971469_96972004_+	167.947	0	357.756	8.48283	12.5894	2.41396e-36	4.74746e-35	Up	0	0	0	0	139.764	28.1823
circRNA_09764|Chr13:108112803_108113662_-	428.901	149.783	3.04986	1.60874	12.5655	3.26807e-36	6.29603e-35	Up	43.9839	86.4268	19.3724	241.784	93.1763	93.9409
circRNA_03792|Chr04:216282298_216282703_+	164.332	0	350.055	8.45144	12.4748	1.02479e-35	1.93481e-34	Up	0	0	0	33.3495	65.2234	65.7586
circRNA_08776|Chr11:114614469_114668428_-	195.797	25.9281	8.04307	3.00775	12.4493	1.4116e-35	2.61284e-34	Up	0	25.9281	0	83.3737	37.2705	75.1527
circRNA_06423|Chr08:13676863_13677328_-	162.142	0	345.39	8.43208	12.4045	2.46917e-35	4.48249e-34	Up	0	0	0	50.0242	74.541	37.5764
circRNA_03223|Chr04:37361419_37362973_-	408.448	143.073	3.04063	1.60437	12.2377	1.95379e-34	3.47996e-33	Up	35.1871	69.1415	38.7449	100.048	195.67	112.729
circRNA_06766|Chr08:182663249_182663724_+	169.805	17.5935	10.2797	3.36173	12.1864	3.67236e-34	6.41983e-33	Up	17.5935	0	0	66.699	27.9529	75.1527
circRNA_07066|Chr09:18984313_18988156_-	100.048	365.612	0.291458	-1.77864	-12.0658	1.601e-33	2.74789e-32	Down	149.545	216.067	0	100.048	0	0
circRNA_10441|Chr14:47342505_47343474_+	148.75	0	316.864	8.30772	11.961	5.68661e-33	9.58599e-32	Up	0	0	0	83.3737	46.5882	18.7882
circRNA_01421|Chr02:37963348_37964175_+	41.6869	239.663	0.185261	-2.43237	-11.9254	8.72497e-33	1.44498e-31	Down	79.171	34.5707	125.921	41.6869	0	0
circRNA_04443|Chr05:174223443_174267190_+	16.6747	175.319	0.101301	-3.30327	-11.9098	1.05273e-32	1.71341e-31	Down	140.748	34.5707	0	16.6747	0	0
circRNA_07121|Chr09:34598859_34696019_+	122.123	402.648	0.323041	-1.63021	-11.9089	1.06325e-32	1.7012e-31	Down	290.293	112.355	0	0	0	122.123
circRNA_08888|Chr11:134288430_134289333_+	145.926	0	310.847	8.28006	11.8642	1.81648e-32	2.85793e-31	Up	0	0	0	33.3495	18.6353	93.9409
circRNA_07283|Chr09:81588980_81627667_-	18.7882	180.158	0.111075	-3.1704	-11.8574	1.96954e-32	3.04794e-31	Down	0	112.355	67.8036	0	0	18.7882
circRNA_09799|Chr13:114776585_114828003_-	300.611	697.907	0.458768	-1.12416	-11.8107	3.43544e-32	5.23073e-31	Down	378.261	0	319.645	0	0	300.611
circRNA_03329|Chr04:82271682_82321379_+	425.123	165.906	2.72921	1.44849	11.5814	5.11903e-31	7.67042e-30	Up	96.7645	69.1415	0	116.723	195.67	112.729
circRNA_05948|Chr07:137078354_137166298_-	0	145.006	0.00367255	-8.089	-11.5721	5.70487e-31	8.41469e-30	Down	26.3903	60.4988	58.1173	0	0	0
circRNA_01855|Chr02:101870919_101871071_-	137.435	0	292.762	8.19358	11.5656	6.15291e-31	8.93592e-30	Up	0	0	0	25.0121	37.2705	75.1527
circRNA_08420|Chr11:49135580_49174793_-	153.804	17.2854	9.4771	3.24445	11.4231	3.20433e-30	4.58316e-29	Up	0	17.2854	0	41.6869	74.541	37.5764
circRNA_04550|Chr05:204523030_204523745_-	154.147	17.5935	9.33182	3.22216	11.4013	4.12115e-30	5.80652e-29	Up	17.5935	0	0	116.723	18.6353	18.7882
circRNA_10473|Chr14:58112352_58113397_+	173.955	25.9281	7.14583	2.8371	11.4007	4.15009e-30	5.7613e-29	Up	0	25.9281	0	33.3495	37.2705	103.335
circRNA_04114|Chr05:24747174_24747401_-	0	139.362	0.00382131	-8.03172	-11.3767	5.46412e-30	7.47555e-29	Down	61.5774	77.7842	0	0	0	0
circRNA_02450|Chr03:45828227_45870032_+	0	138.451	0.00384645	-8.02226	-11.3447	7.88236e-30	1.06299e-28	Down	26.3903	34.5707	77.4898	0	0	0
circRNA_00295|Chr01:66320405_66320938_+	129.287	0	275.405	8.10541	11.2677	1.8946e-29	2.51902e-28	Up	0	0	0	91.7111	0	37.5764
circRNA_07156|Chr09:54743726_54744808_-	128.792	0	274.35	8.09987	11.2492	2.33706e-29	3.04301e-28	Up	0	0	0	16.6747	74.541	37.5764
circRNA_10927|Chr15:8923580_8930975_-	128.792	0	274.35	8.09987	11.2492	2.33706e-29	3.04301e-28	Up	0	0	0	16.6747	74.541	37.5764
circRNA_06075|Chr07:192150914_192152259_+	127.812	0	272.262	8.08885	11.2125	3.5424e-29	4.51896e-28	Up	0	0	0	25.0121	65.2234	37.5764
circRNA_01274|Chr02:16115688_16123829_+	407.175	162.138	2.67475	1.4194	11.1626	6.21551e-29	7.82326e-28	Up	17.5935	86.4268	58.1173	116.723	93.1763	197.276
circRNA_00446|Chr01:146121420_146133428_-	124.565	0	265.346	8.05173	11.0894	1.4118e-28	1.7536e-27	Up	0	0	0	50.0242	74.541	0
circRNA_07934|Chr10:89662685_89663199_-	169.094	458.16	0.393093	-1.34706	-11.0266	2.84415e-28	3.48685e-27	Down	158.342	164.211	135.607	0	0	169.094
circRNA_02120|Chr02:223115579_223117774_-	221.407	52.7806	4.46789	2.15959	11.0114	3.36661e-28	4.07446e-27	Up	52.7806	0	0	100.048	93.1763	28.1823
circRNA_00649|Chr01:197072743_197098628_-	0	128.919	0.00413085	-7.91934	-11.0012	3.77167e-28	4.50691e-27	Down	35.1871	25.9281	67.8036	0	0	0
circRNA_08230|Chr11:302601_313275_-	150.558	19.3724	8.27759	3.04921	10.9874	4.39296e-28	5.1837e-27	Up	0	0	19.3724	66.699	83.8587	0
circRNA_01321|Chr02:20021099_20021400_-	230.625	58.1173	4.22656	2.07948	10.9729	5.15666e-28	6.00974e-27	Up	0	0	58.1173	33.3495	0	197.276
circRNA_02428|Chr03:38243209_38243647_-	0	127.567	0.00417462	-7.90414	-10.9512	6.56033e-28	7.55238e-27	Down	17.5935	51.8561	58.1173	0	0	0
circRNA_04072|Chr05:22155794_22157966_+	164.408	25.9281	6.75365	2.75567	10.9182	9.43548e-28	1.07314e-26	Up	0	25.9281	0	33.3495	55.9058	75.1527
circRNA_08248|Chr11:4176750_4188228_+	120.01	0	255.642	7.99798	10.9133	9.96026e-28	1.11934e-26	Up	0	0	0	16.6747	0	103.335
circRNA_00047|Chr01:6646663_6649794_+	163.541	25.9281	6.71803	2.74804	10.8736	1.54055e-27	1.69102e-26	Up	0	25.9281	0	116.723	18.6353	28.1823
circRNA_10968|Chr15:14588145_14631805_+	117.59	0	250.488	7.9686	10.818	2.82989e-27	3.0706e-26	Up	0	0	0	33.3495	37.2705	46.9704
circRNA_09075|Chr12:58394635_58399022_+	63.2629	259.735	0.25942	-1.94664	-10.809	3.12075e-27	3.34771e-26	Down	0	95.0695	164.666	16.6747	46.5882	0
circRNA_01018|Chr01:255449513_255455853_+	117.361	0	250	7.96578	10.8089	3.12517e-27	3.31478e-26	Up	0	0	0	33.3495	65.2234	18.7882
circRNA_05232|Chr06:121958997_121959155_+	0	123.701	0.00430509	-7.85974	-10.8062	3.21783e-27	3.37514e-26	Down	35.1871	69.1415	19.3724	0	0	0
circRNA_02687|Chr03:136105052_136111287_+	162.969	26.3903	6.57727	2.71749	10.7909	3.8018e-27	3.94384e-26	Up	26.3903	0	0	41.6869	102.494	18.7882
circRNA_10264|Chr14:10633623_10633898_+	0	122.538	0.00434593	-7.84612	-10.762	5.20189e-27	5.33759e-26	Down	87.9677	34.5707	0	0	0	0
circRNA_00079|Chr01:13805709_13806137_-	0	121.922	0.0043679	-7.83884	-10.7385	6.71319e-27	6.81425e-26	Down	52.7806	69.1415	0	0	0	0
circRNA_02113|Chr02:222043689_222044094_-	0	121.011	0.00440078	-7.82803	-10.7036	9.79088e-27	9.83254e-26	Down	17.5935	25.9281	77.4898	0	0	0
circRNA_07897|Chr10:64302550_64303029_-	160.856	26.3903	6.49198	2.69866	10.6812	1.24698e-26	1.23911e-25	Up	26.3903	0	0	58.3616	102.494	0
circRNA_09495|Chr13:63692906_63701014_+	0	119.695	0.00444919	-7.81224	-10.6528	1.69136e-26	1.66317e-25	Down	61.5774	0	58.1173	0	0	0
circRNA_06976|Chr09:5863144_5864459_+	459.299	209.974	2.32979	1.2202	10.5513	5.00971e-26	4.87542e-25	Up	26.3903	164.211	19.3724	141.735	223.623	93.9409
circRNA_09033|Chr12:37274091_37282298_-	163.275	433.549	0.401113	-1.31792	-10.5471	5.24035e-26	5.04785e-25	Down	114.358	164.211	154.98	41.6869	65.2234	56.3645
circRNA_01620|Chr02:61773937_61774169_+	0	116.529	0.00457005	-7.77357	-10.5293	6.32997e-26	6.03585e-25	Down	0	77.7842	38.7449	0	0	0
circRNA_06305|Chr07:251591067_251597801_+	0	115.058	0.00462847	-7.75525	-10.4712	1.17172e-25	1.1061e-24	Down	35.1871	60.4988	19.3724	0	0	0
circRNA_09226|Chr12:133803106_133888543_+	41.6869	206.276	0.215247	-2.21594	-10.4642	1.2619e-25	1.17944e-24	Down	70.3742	77.7842	58.1173	41.6869	0	0
circRNA_00261|Chr01:49821867_49822056_-	0	114.148	0.0046654	-7.74378	-10.4349	1.71706e-25	1.5737e-24	Down	0	17.2854	96.8622	0	0	0
circRNA_01277|Chr02:16122898_16146796_+	106.389	0	226.627	7.82418	10.3594	3.79526e-25	3.39595e-24	Up	0	0	0	50.0242	0	56.3645
circRNA_08237|Chr11:1713985_1715210_-	106.389	0	226.627	7.82418	10.3594	3.79526e-25	3.39595e-24	Up	0	0	0	50.0242	0	56.3645
circRNA_07477|Chr09:146212613_146213153_+	103.182	0	219.796	7.78002	10.2224	1.57437e-24	1.38898e-23	Up	0	0	0	0	18.6353	84.5468
circRNA_11328|Chr15:126611060_126611222_-	0	107.886	0.00493616	-7.6624	-10.1807	2.4189e-24	2.1143e-23	Down	0	69.1415	38.7449	0	0	0
circRNA_03303|Chr04:58263688_58264136_+	102.162	0	217.623	7.76569	10.1782	2.48048e-24	2.14824e-23	Up	0	0	0	83.3737	0	18.7882
circRNA_02671|Chr03:117015945_117016630_-	0	107.305	0.0049629	-7.6546	-10.1566	3.09729e-24	2.65804e-23	Down	26.3903	51.8561	29.0587	0	0	0
circRNA_00378|Chr01:119766387_119766705_-	0	105.799	0.00503353	-7.63421	-10.0938	5.88419e-24	4.95953e-23	Down	0	86.4268	19.3724	0	0	0
circRNA_02228|Chr03:11604573_11604861_-	0	105.253	0.00505965	-7.62675	-10.0709	7.42999e-24	6.207e-23	Down	87.9677	17.2854	0	0	0	0
circRNA_06409|Chr08:8623867_8624809_-	28.1823	167.047	0.179689	-2.47642	-10.0585	8.42632e-24	6.97758e-23	Down	0	60.4988	106.548	0	0	28.1823
circRNA_05693|Chr07:83285506_83285733_-	0	104.945	0.00507451	-7.62252	-10.0579	8.47605e-24	6.95773e-23	Down	70.3742	34.5707	0	0	0	0
circRNA_02150|Chr02:225767905_225773184_-	99.1081	0	211.118	7.7219	10.0443	9.72956e-24	7.91785e-23	Up	0	0	0	33.3495	0	65.7586
circRNA_02779|Chr03:181957097_181957369_-	154.416	29.0587	5.65981	2.50075	10.0361	1.05754e-23	8.53263e-23	Up	0	0	29.0587	41.6869	0	112.729
circRNA_04596|Chr06:990772_999769_-	197.452	52.1643	4.03156	2.01134	9.93665	2.88362e-23	2.3069e-22	Up	17.5935	34.5707	0	66.699	93.1763	37.5764
circRNA_02167|Chr02:228956071_228958202_-	285.916	104.945	2.90177	1.53693	9.92183	3.34562e-23	2.65401e-22	Up	70.3742	34.5707	0	183.422	102.494	0
circRNA_03000|Chr04:4453835_4454306_+	95.938	0	204.365	7.675	9.90252	4.05911e-23	3.19317e-22	Up	0	0	0	58.3616	0	37.5764
circRNA_06888|Chr08:211374149_211376607_-	164.102	35.1871	4.96726	2.31245	9.88464	4.85329e-23	3.78637e-22	Up	35.1871	0	0	33.3495	93.1763	37.5764
circRNA_02836|Chr03:196358586_196412671_+	111.327	325.746	0.364003	-1.45798	-9.86913	5.66541e-23	4.38372e-22	Down	0	190.139	135.607	83.3737	27.9529	0
circRNA_00646|Chr01:197070910_197096636_-	256.043	87.176	3.12825	1.64535	9.86378	5.97548e-23	4.58606e-22	Up	0	0	87.176	125.061	65.2234	65.7586
circRNA_06568|Chr08:111145305_111145651_+	145.467	26.3903	5.87091	2.55358	9.85596	6.45993e-23	4.91789e-22	Up	26.3903	0	0	33.3495	74.541	37.5764
circRNA_07726|Chr10:11440564_11451643_-	170.555	38.7449	4.68853	2.22914	9.85547	6.49102e-23	4.90202e-22	Up	0	0	38.7449	58.3616	65.2234	46.9704
circRNA_06922|Chr09:1065121_1068522_+	94.6519	0	201.625	7.65553	9.84413	7.26669e-23	5.44425e-22	Up	0	0	0	66.699	27.9529	0
circRNA_01487|Chr02:45464884_45465215_-	93.4821	0	199.133	7.63759	9.79057	1.23594e-22	9.18681e-22	Up	0	0	0	0	55.9058	37.5764
circRNA_03903|Chr04:234994086_235002537_-	0	97.1566	0.0054813	-7.51127	-9.7219	2.4321e-22	1.79368e-21	Down	0	77.7842	19.3724	0	0	0
circRNA_02000|Chr02:164218339_164218890_+	16.6747	132.049	0.134496	-2.89437	-9.72143	2.44331e-22	1.78797e-21	Down	35.1871	0	96.8622	16.6747	0	0
circRNA_05280|Chr06:139571984_139572781_+	91.8274	0	195.609	7.61183	9.71407	2.62623e-22	1.90705e-21	Up	0	0	0	16.6747	0	75.1527
circRNA_06662|Chr08:143180836_143181411_-	91.2158	0	194.306	7.60218	9.68557	3.47256e-22	2.50237e-21	Up	0	0	0	16.6747	74.541	0
circRNA_04637|Chr06:6173651_6174176_+	126.755	19.3724	6.96894	2.80094	9.66768	4.1366e-22	2.9583e-21	Up	0	0	19.3724	33.3495	65.2234	28.1823
circRNA_04972|Chr06:66745995_66746688_-	90.4649	0	192.706	7.59026	9.65042	4.89571e-22	3.47485e-21	Up	0	0	0	25.0121	37.2705	28.1823
circRNA_06785|Chr08:184640064_184645363_-	174.972	43.5216	4.28202	2.09829	9.61197	7.11709e-22	5.01383e-21	Up	17.5935	25.9281	0	100.048	27.9529	46.9704
circRNA_08136|Chr10:171014091_171015516_+	89.4082	0	190.455	7.57331	9.60062	7.94654e-22	5.55669e-21	Up	0	0	0	33.3495	37.2705	18.7882
circRNA_00351|Chr01:113608599_113610024_-	89.2553	0	190.129	7.57084	9.59338	8.52438e-22	5.89525e-21	Up	0	0	0	33.3495	55.9058	0
circRNA_03695|Chr04:196186322_196186682_+	89.2553	0	190.129	7.57084	9.59338	8.52438e-22	5.89525e-21	Up	0	0	0	33.3495	55.9058	0
circRNA_10073|Chr13:139614390_139614846_-	0	93.7316	0.00568158	-7.45949	-9.56864	1.08321e-21	7.40978e-21	Down	0	25.9281	67.8036	0	0	0
circRNA_03774|Chr04:212958203_212958482_-	0	93.3044	0.0057076	-7.4529	-9.54927	1.30607e-21	8.87002e-21	Down	35.1871	0	58.1173	0	0	0
circRNA_04591|Chr06:404474_406881_-	87.6006	0	186.605	7.54384	9.51456	1.8249e-21	1.2305e-20	Up	0	0	0	50.0242	0	37.5764
circRNA_01838|Chr02:94319286_94324029_-	0	91.5255	0.00581853	-7.42513	-9.46802	2.85209e-21	1.89604e-20	Down	52.7806	0	38.7449	0	0	0
circRNA_02250|Chr03:13584331_13585922_+	85.4872	0	182.103	7.50861	9.41247	4.84592e-21	3.19898e-20	Up	0	0	0	66.699	0	18.7882
circRNA_02715|Chr03:150181349_150181570_+	117.514	17.2854	7.24097	2.85618	9.40163	5.37237e-21	3.52189e-20	Up	0	17.2854	0	33.3495	46.5882	37.5764
circRNA_11282|Chr15:113548416_113549261_+	0	89.7466	0.00593386	-7.39681	-9.38574	6.24767e-21	4.06745e-20	Down	70.3742	0	19.3724	0	0	0
circRNA_03234|Chr04:39477638_39479632_-	0	89.4385	0.00595431	-7.39185	-9.37138	7.15905e-21	4.62886e-20	Down	52.7806	17.2854	19.3724	0	0	0
circRNA_03116|Chr04:19598653_19599257_-	84.088	0	179.122	7.4848	9.344	9.276e-21	5.95683e-20	Up	0	0	0	0	55.9058	28.1823
circRNA_11352|Chr15:137921705_137923686_+	18.7882	129.962	0.153976	-2.69922	-9.30347	1.35938e-20	8.67063e-20	Down	35.1871	17.2854	77.4898	0	0	18.7882
circRNA_05032|Chr06:72472414_72474612_-	0	87.6595	0.00607514	-7.36287	-9.28787	1.57412e-20	9.97298e-20	Down	70.3742	17.2854	0	0	0	0
circRNA_07637|Chr09:198324083_198326872_-	82.4334	0	175.598	7.45613	9.26207	2.00502e-20	1.26183e-19	Up	0	0	0	16.6747	0	65.7586
circRNA_07302|Chr09:83067320_83067667_+	82.204	0	175.109	7.45211	9.25063	2.23169e-20	1.39517e-19	Up	0	0	0	16.6747	27.9529	37.5764
circRNA_11069|Chr15:51443159_51443306_+	0	86.735	0.0061399	-7.34757	-9.24403	2.37376e-20	1.47423e-19	Down	17.5935	69.1415	0	0	0	0
circRNA_08176|Chr10:182347404_182347559_+	80.0906	0	170.607	7.41453	9.14425	6.00461e-20	3.7048e-19	Up	0	0	0	33.3495	27.9529	18.7882
circRNA_03417|Chr04:117004708_117014563_-	214.458	72.1531	3.16573	1.66254	9.09382	9.56183e-20	5.86128e-19	Up	52.7806	0	19.3724	0	195.67	18.7882
circRNA_04595|Chr06:990772_991111_-	241.558	89.5575	2.8728	1.52246	9.05585	1.35506e-19	8.25277e-19	Up	0	60.4988	29.0587	91.7111	55.9058	93.9409
circRNA_07840|Chr10:38086048_38090010_-	77.1498	0	164.343	7.36056	8.99318	2.40172e-19	1.43495e-18	Up	0	0	0	58.3616	0	18.7882
circRNA_08134|Chr10:170999467_171005437_+	0	80.9499	0.00657869	-7.24798	-8.96273	3.16749e-19	1.88057e-18	Down	61.5774	0	19.3724	0	0	0
circRNA_03734|Chr04:205147373_205148850_+	0	80.9148	0.00658154	-7.24736	-8.96098	3.218e-19	1.89862e-18	Down	0	51.8561	29.0587	0	0	0
circRNA_04998|Chr06:68683445_68684071_-	110.31	17.5935	6.678	2.73942	8.91505	4.87598e-19	2.85896e-18	Up	17.5935	0	0	16.6747	37.2705	56.3645
circRNA_05685|Chr07:83285225_83285452_-	95.6321	273.344	0.372632	-1.42418	-8.88208	6.5623e-19	3.82396e-18	Down	87.9677	69.1415	116.235	58.3616	37.2705	0
circRNA_05319|Chr06:157220284_157220418_+	74.9998	0	159.763	7.31979	8.88039	6.66257e-19	3.85857e-18	Up	0	0	0	0	18.6353	56.3645
circRNA_04924|Chr06:63297233_63299845_-	74.8469	0	159.437	7.31684	8.87229	7.16565e-19	4.12462e-18	Up	0	0	0	0	37.2705	37.5764
circRNA_05405|Chr06:189907426_189912588_-	16.6747	116.718	0.152162	-2.71632	-8.84615	9.05882e-19	5.18274e-18	Down	70.3742	17.2854	29.0587	16.6747	0	0
circRNA_02986|Chr04:2770315_2775272_-	229.974	85.3971	2.86827	1.52018	8.82615	1.08337e-18	6.16084e-18	Up	17.5935	0	67.8036	108.386	65.2234	56.3645
circRNA_04691|Chr06:14296465_14296839_+	46.5882	181.664	0.273144	-1.87227	-8.8062	1.29464e-18	7.31821e-18	Down	26.3903	77.7842	77.4898	0	46.5882	0
circRNA_04986|Chr06:67034376_67034553_-	73.0393	0	155.587	7.28157	8.77572	1.69811e-18	9.54177e-18	Up	0	0	0	16.6747	0	56.3645
circRNA_07324|Chr09:90004267_90066173_+	126.526	26.3903	5.10646	2.35232	8.76787	1.82071e-18	1.01701e-17	Up	26.3903	0	0	33.3495	93.1763	0
circRNA_06776|Chr08:182849781_182853638_+	72.8864	0	155.261	7.27855	8.76748	1.82705e-18	1.01455e-17	Up	0	0	0	16.6747	18.6353	37.5764
circRNA_00153|Chr01:23306407_23306958_+	72.8099	0	155.098	7.27704	8.76336	1.89517e-18	1.04622e-17	Up	0	0	0	16.6747	27.9529	28.1823
circRNA_02728|Chr03:155528890_155529243_-	72.7334	0	154.935	7.27552	8.75923	1.96584e-18	1.07893e-17	Up	0	0	0	16.6747	37.2705	18.7882
circRNA_01965|Chr02:153671846_153672809_+	71.6003	0	152.521	7.25287	8.69775	3.3854e-18	1.84729e-17	Up	0	0	0	25.0121	46.5882	0
circRNA_02332|Chr03:26832991_26833197_+	0	75.7109	0.00703392	-7.15146	-8.69666	3.41784e-18	1.84896e-17	Down	17.5935	0	58.1173	0	0	0
circRNA_10295|Chr14:18773670_18820115_-	0	75.7109	0.00703392	-7.15146	-8.69666	3.41784e-18	1.84896e-17	Down	17.5935	0	58.1173	0	0	0
circRNA_02984|Chr03:229418262_229420875_-	161.314	45.7628	3.75445	1.9086	8.67537	4.12193e-18	2.21086e-17	Up	26.3903	0	19.3724	58.3616	46.5882	56.3645
circRNA_05219|Chr06:118353841_118362030_-	70.7729	0	150.759	7.2361	8.65246	5.04006e-18	2.68803e-17	Up	0	0	0	33.3495	18.6353	18.7882
circRNA_07955|Chr10:97026709_97040328_-	0	74.8214	0.00711753	-7.13441	-8.65034	5.13482e-18	2.72318e-17	Down	26.3903	0	48.4311	0	0	0
circRNA_00457|Chr01:147192894_147195924_-	70.62	0	150.433	7.23298	8.64405	5.42529e-18	2.85319e-17	Up	0	0	0	33.3495	37.2705	0
circRNA_00781|Chr01:218634592_218638274_-	70.62	0	150.433	7.23298	8.64405	5.42529e-18	2.85319e-17	Up	0	0	0	33.3495	37.2705	0
circRNA_03945|Chr05:10662828_10663322_+	220.543	82.4206	2.84999	1.51096	8.60445	7.66854e-18	3.9995e-17	Up	26.3903	17.2854	38.7449	33.3495	83.8587	103.335
circRNA_02273|Chr03:15534440_15535125_-	108.386	288.045	0.400773	-1.31914	-8.60086	7.91232e-18	4.10397e-17	Down	0	181.496	106.548	108.386	0	0
circRNA_10563|Chr14:79216138_79216305_+	69.6398	0	148.345	7.21281	8.58988	8.7058e-18	4.49086e-17	Up	0	0	0	41.6869	27.9529	0
circRNA_09025|Chr12:35654533_35654703_-	0	73.6238	0.00723331	-7.11113	-8.5874	8.89615e-18	4.56411e-17	Down	17.5935	17.2854	38.7449	0	0	0
circRNA_01690|Chr02:72329658_72331180_+	0	73.3156	0.00726372	-7.10508	-8.5711	1.02504e-17	5.21639e-17	Down	0	34.5707	38.7449	0	0	0
circRNA_03516|Chr04:148940564_148941288_-	0	73.3156	0.00726372	-7.10508	-8.5711	1.02504e-17	5.21639e-17	Down	0	34.5707	38.7449	0	0	0
circRNA_09312|Chr12:151637447_151637791_+	68.8124	0	146.583	7.19557	8.54378	1.29899e-17	6.53998e-17	Up	0	0	0	50.0242	0	18.7882
circRNA_10850|Chr15:662529_663929_+	68.8124	0	146.583	7.19557	8.54378	1.29899e-17	6.53998e-17	Up	0	0	0	50.0242	0	18.7882
circRNA_05508|Chr06:210752163_210757612_+	68.6595	0	146.257	7.19236	8.53522	1.39886e-17	6.98689e-17	Up	0	0	0	50.0242	18.6353	0
circRNA_05620|Chr07:80093489_80093646_+	0	72.5803	0.00733731	-7.09053	-8.53202	1.43812e-17	7.14517e-17	Down	17.5935	25.9281	29.0587	0	0	0
circRNA_00831|Chr01:225504099_225504274_-	0	72.2721	0.0073686	-7.08439	-8.51557	1.65771e-17	8.19306e-17	Down	0	43.2134	29.0587	0	0	0
circRNA_00238|Chr01:40281543_40287003_+	138.645	34.8789	4.23377	2.08194	8.51317	1.6924e-17	8.32098e-17	Up	17.5935	17.2854	0	16.6747	18.6353	103.335
circRNA_02720|Chr03:155483589_155486324_-	0	71.6908	0.00742835	-7.07274	-8.48442	2.16795e-17	1.06039e-16	Down	26.3903	25.9281	19.3724	0	0	0
circRNA_00117|Chr01:20457632_20459651_-	0	71.2286	0.00747655	-7.06341	-8.45953	2.6845e-17	1.29957e-16	Down	0	51.8561	19.3724	0	0	0
circRNA_09796|Chr13:114095995_114097287_-	0	71.2286	0.00747655	-7.06341	-8.45953	2.6845e-17	1.29957e-16	Down	0	51.8561	19.3724	0	0	0
circRNA_10637|Chr14:89757022_89759566_-	0	71.2286	0.00747655	-7.06341	-8.45953	2.6845e-17	1.29957e-16	Down	0	51.8561	19.3724	0	0	0
circRNA_02336|Chr03:27573539_27580871_-	16.6747	109.973	0.161494	-2.63045	-8.43992	3.17547e-17	1.52165e-16	Down	0	51.8561	58.1173	16.6747	0	0
circRNA_05850|Chr07:112228988_112229738_-	399.396	211.802	2.00845	1.00608	8.41882	3.80295e-17	1.81312e-16	Up	87.9677	17.2854	106.548	175.085	139.764	84.5468
circRNA_03183|Chr04:33034927_33035258_-	106.236	19.3724	5.8408	2.54617	8.40865	4.14767e-17	1.96754e-16	Up	0	0	19.3724	50.0242	18.6353	37.5764
circRNA_01092|Chr01:257437566_257437909_+	0	70.066	0.00760061	-7.03967	-8.39648	4.60047e-17	2.17142e-16	Down	52.7806	17.2854	0	0	0	0
circRNA_05557|Chr07:73713211_73713668_+	0	69.9119	0.00761736	-7.03649	-8.38808	4.94158e-17	2.32082e-16	Down	43.9839	25.9281	0	0	0	0
circRNA_01386|Chr02:33878416_33878598_+	0	69.7578	0.00763419	-7.03331	-8.37966	5.30814e-17	2.47451e-16	Down	35.1871	34.5707	0	0	0	0
circRNA_08421|Chr11:49207275_49207436_+	0	69.7578	0.00763419	-7.03331	-8.37966	5.30814e-17	2.47451e-16	Down	35.1871	34.5707	0	0	0	0
circRNA_10813|Chr14:151827495_151858389_-	0	69.4497	0.00766806	-7.02692	-8.36279	6.12542e-17	2.83451e-16	Down	17.5935	51.8561	0	0	0	0
circRNA_02081|Chr02:200176412_200179385_-	65.6057	0	139.752	7.12672	8.36168	6.18335e-17	2.84736e-16	Up	0	0	0	0	18.6353	46.9704
circRNA_05401|Chr06:189884611_189893303_-	16.6747	107.886	0.164618	-2.6028	-8.31131	9.46492e-17	4.33732e-16	Down	0	69.1415	38.7449	16.6747	0	0
circRNA_02812|Chr03:187253233_187267037_-	99.5532	17.2854	6.13426	2.61689	8.26398	1.40891e-16	6.3943e-16	Up	0	17.2854	0	25.0121	74.541	0
circRNA_03113|Chr04:19232017_19256748_+	63.6452	0	135.575	7.08295	8.24753	1.61707e-16	7.28646e-16	Up	0	0	0	16.6747	0	46.9704
circRNA_03575|Chr04:166386123_166387127_+	63.6452	0	135.575	7.08295	8.24753	1.61707e-16	7.28646e-16	Up	0	0	0	16.6747	0	46.9704
circRNA_02756|Chr03:173197285_173212259_+	63.2629	0	134.761	7.07426	8.22501	1.95179e-16	8.73217e-16	Up	0	0	0	16.6747	46.5882	0
circRNA_07549|Chr09:186863123_186863471_-	103.029	19.3724	5.66449	2.50195	8.19953	2.41326e-16	1.07458e-15	Up	0	0	19.3724	0	37.2705	65.7586
circRNA_04343|Chr05:135018468_135020011_+	62.5885	0	133.324	7.0588	8.18507	2.72151e-16	1.20333e-15	Up	0	0	0	25.0121	0	37.5764
circRNA_08158|Chr10:180280835_180285329_-	62.5885	0	133.324	7.0588	8.18507	2.72151e-16	1.20333e-15	Up	0	0	0	25.0121	0	37.5764
circRNA_01980|Chr02:156317380_156335709_+	62.4356	0	132.999	7.05527	8.17597	2.93486e-16	1.28861e-15	Up	0	0	0	25.0121	18.6353	18.7882
circRNA_08344|Chr11:17901103_17938459_-	116.84	26.3903	4.71553	2.23742	8.17513	2.95539e-16	1.29162e-15	Up	26.3903	0	0	41.6869	0	75.1527
circRNA_03037|Chr04:7614688_7616210_-	62.2826	0	132.673	7.05173	8.16687	3.16505e-16	1.3737e-15	Up	0	0	0	25.0121	37.2705	0
circRNA_10173|Chr14:928838_929139_-	62.2826	0	132.673	7.05173	8.16687	3.16505e-16	1.3737e-15	Up	0	0	0	25.0121	37.2705	0
circRNA_10819|Chr14:152148111_152149242_+	116.534	26.3903	4.70319	2.23364	8.15597	3.4639e-16	1.49311e-15	Up	26.3903	0	0	41.6869	37.2705	37.5764
circRNA_00505|Chr01:166892472_166895853_-	0	65.7165	0.00810366	-6.94721	-8.1545	3.50638e-16	1.50456e-15	Down	0	17.2854	48.4311	0	0	0
circRNA_00380|Chr01:122062748_122063791_+	61.5318	0	131.074	7.03423	8.12193	4.58817e-16	1.94662e-15	Up	0	0	0	33.3495	0	28.1823
circRNA_07195|Chr09:55286042_55288094_+	61.5318	0	131.074	7.03423	8.12193	4.58817e-16	1.94662e-15	Up	0	0	0	33.3495	0	28.1823
circRNA_02365|Chr03:29342219_29350407_+	61.3024	0	130.585	7.02884	8.10814	5.14015e-16	2.16138e-15	Up	0	0	0	33.3495	27.9529	0
circRNA_06297|Chr07:251324672_251325140_+	61.3024	0	130.585	7.02884	8.10814	5.14015e-16	2.16138e-15	Up	0	0	0	33.3495	27.9529	0
circRNA_07580|Chr09:192310864_192311587_-	0	64.6729	0.00823442	-6.92412	-8.09493	5.72969e-16	2.388e-15	Down	0	25.9281	38.7449	0	0	0
circRNA_07849|Chr10:39912861_39913283_+	0	64.6729	0.00823442	-6.92412	-8.09493	5.72969e-16	2.388e-15	Down	0	25.9281	38.7449	0	0	0
circRNA_06267|Chr07:240833858_240836766_-	97.5926	17.5935	5.90812	2.5627	8.08837	6.04696e-16	2.50365e-15	Up	17.5935	0	0	41.6869	55.9058	0
circRNA_01831|Chr02:94303674_94304454_+	0	64.2458	0.00828917	-6.91456	-8.07037	7.00853e-16	2.88911e-15	Down	35.1871	0	29.0587	0	0	0
circRNA_00480|Chr01:151337110_151346704_+	60.475	0	128.823	7.00924	8.0581	7.74873e-16	3.18035e-15	Up	0	0	0	41.6869	0	18.7882
circRNA_03720|Chr04:201428345_201434109_+	60.3221	0	128.497	7.00559	8.04881	8.36043e-16	3.40918e-15	Up	0	0	0	41.6869	18.6353	0
circRNA_04294|Chr05:119596184_119596773_-	60.3221	0	128.497	7.00559	8.04881	8.36043e-16	3.40918e-15	Up	0	0	0	41.6869	18.6353	0
circRNA_03541|Chr04:159447289_159498577_-	222.809	91.6445	2.58948	1.37266	8.04772	8.4354e-16	3.4176e-15	Up	0	43.2134	48.4311	16.6747	65.2234	140.911
circRNA_00137|Chr01:21539683_21548557_-	0	63.3563	0.00840554	-6.89444	-8.0189	1.06699e-15	4.30443e-15	Down	43.9839	0	19.3724	0	0	0
circRNA_05695|Chr07:83285681_83285908_-	0	63.0481	0.00844663	-6.88741	-8.00096	1.23457e-15	4.9593e-15	Down	26.3903	17.2854	19.3724	0	0	0
circRNA_10124|Chr13:156418776_156419596_-	18.6353	107.34	0.184909	-2.43511	-7.98487	1.40671e-15	5.62683e-15	Down	87.9677	0	19.3724	0	18.6353	0
circRNA_00127|Chr01:20817410_20817610_+	0	62.5859	0.00850902	-6.87679	-7.97394	1.53696e-15	6.12189e-15	Down	0	43.2134	19.3724	0	0	0
circRNA_11276|Chr15:113159856_113199806_-	37.2705	146.975	0.27009	-1.88849	-7.96668	1.62993e-15	6.46495e-15	Down	79.171	0	67.8036	0	37.2705	0
circRNA_07822|Chr10:33522348_33529724_+	99.1081	19.3724	5.44892	2.44597	7.93868	2.04348e-15	8.07133e-15	Up	0	0	19.3724	33.3495	0	65.7586
circRNA_01617|Chr02:61558219_61585769_+	16.6747	101.793	0.174472	-2.51893	-7.9274	2.23787e-15	8.8023e-15	Down	26.3903	17.2854	58.1173	16.6747	0	0
circRNA_09943|Chr13:131959545_132023101_+	168.253	58.1173	3.08348	1.62456	7.9222	2.3334e-15	9.13996e-15	Up	0	0	58.1173	0	102.494	65.7586
circRNA_03900|Chr04:234303464_234402058_-	0	61.2692	0.00869187	-6.84612	-7.89629	2.87339e-15	1.12086e-14	Down	43.9839	17.2854	0	0	0	0
circRNA_06492|Chr08:50106168_50106289_-	0	60.9611	0.00873581	-6.83884	-7.87796	3.32778e-15	1.28747e-14	Down	26.3903	34.5707	0	0	0	0
circRNA_07330|Chr09:92800972_92801331_-	0	60.9611	0.00873581	-6.83884	-7.87796	3.32778e-15	1.28747e-14	Down	26.3903	34.5707	0	0	0	0
circRNA_09245|Chr12:144099129_144103764_-	0	60.9611	0.00873581	-6.83884	-7.87796	3.32778e-15	1.28747e-14	Down	26.3903	34.5707	0	0	0	0
circRNA_04100|Chr05:24746298_24746684_-	0	60.807	0.00875795	-6.83519	-7.86877	3.58144e-15	1.37155e-14	Down	17.5935	43.2134	0	0	0	0
circRNA_06576|Chr08:112532715_112532900_+	0	60.807	0.00875795	-6.83519	-7.86877	3.58144e-15	1.37155e-14	Down	17.5935	43.2134	0	0	0	0
circRNA_08231|Chr11:309770_313275_-	93.635	17.5935	5.66853	2.50298	7.81851	5.34513e-15	2.0346e-14	Up	17.5935	0	0	0	37.2705	56.3645
circRNA_05155|Chr06:97760911_97764628_+	202.582	81.5311	2.64645	1.40406	7.80633	5.88775e-15	2.23214e-14	Up	35.1871	17.2854	29.0587	25.0121	111.812	65.7586
circRNA_07904|Chr10:69737984_69739398_+	56.2116	0	119.741	6.90377	7.7931	6.53839e-15	2.4689e-14	Up	0	0	0	0	18.6353	37.5764
circRNA_06469|Chr08:45283331_45285354_-	56.0587	0	119.415	6.89984	7.78336	7.06216e-15	2.64551e-14	Up	0	0	0	0	37.2705	18.7882
circRNA_08008|Chr10:130421278_130426314_+	56.0587	0	119.415	6.89984	7.78336	7.06216e-15	2.64551e-14	Up	0	0	0	0	37.2705	18.7882
circRNA_09521|Chr13:72514859_72515556_+	56.0587	0	119.415	6.89984	7.78336	7.06216e-15	2.64551e-14	Up	0	0	0	0	37.2705	18.7882
circRNA_06843|Chr08:206542388_206543239_+	91.5216	17.5935	5.54059	2.47004	7.67171	1.69719e-14	6.30768e-14	Up	17.5935	0	0	16.6747	37.2705	37.5764
circRNA_00359|Chr01:113664555_113668644_-	54.2511	0	115.564	6.85255	7.66694	1.7615e-14	6.48285e-14	Up	0	0	0	16.6747	0	37.5764
circRNA_02484|Chr03:48972994_48978544_-	54.2511	0	115.564	6.85255	7.66694	1.7615e-14	6.48285e-14	Up	0	0	0	16.6747	0	37.5764
circRNA_08482|Chr11:67111506_67111727_+	54.2511	0	115.564	6.85255	7.66694	1.7615e-14	6.48285e-14	Up	0	0	0	16.6747	0	37.5764
circRNA_10997|Chr15:19637438_19637634_+	54.2511	0	115.564	6.85255	7.66694	1.7615e-14	6.48285e-14	Up	0	0	0	16.6747	0	37.5764
circRNA_10195|Chr14:4650150_4651181_+	54.0982	0	115.239	6.84848	7.65698	1.9036e-14	6.93822e-14	Up	0	0	0	16.6747	18.6353	18.7882
circRNA_10772|Chr14:135538522_135540802_-	91.2158	17.5935	5.52207	2.46521	7.6503	2.00504e-14	7.27982e-14	Up	17.5935	0	0	16.6747	74.541	0
circRNA_01279|Chr02:16122910_16146796_+	53.9453	0	114.913	6.8444	7.647	2.05725e-14	7.32848e-14	Up	0	0	0	16.6747	37.2705	0
circRNA_01762|Chr02:80359807_80361233_+	53.9453	0	114.913	6.8444	7.647	2.05725e-14	7.32848e-14	Up	0	0	0	16.6747	37.2705	0
circRNA_01981|Chr02:156317380_156363586_+	53.9453	0	114.913	6.8444	7.647	2.05725e-14	7.32848e-14	Up	0	0	0	16.6747	37.2705	0
circRNA_02607|Chr03:88774871_88780117_-	53.9453	0	114.913	6.8444	7.647	2.05725e-14	7.32848e-14	Up	0	0	0	16.6747	37.2705	0
circRNA_04624|Chr06:4578999_4581031_-	53.9453	0	114.913	6.8444	7.647	2.05725e-14	7.32848e-14	Up	0	0	0	16.6747	37.2705	0
circRNA_05978|Chr07:140304113_140304461_-	53.9453	0	114.913	6.8444	7.647	2.05725e-14	7.32848e-14	Up	0	0	0	16.6747	37.2705	0
circRNA_07391|Chr09:105011675_105012324_+	53.9453	0	114.913	6.8444	7.647	2.05725e-14	7.32848e-14	Up	0	0	0	16.6747	37.2705	0
circRNA_09954|Chr13:132338178_132348063_-	53.9453	0	114.913	6.8444	7.647	2.05725e-14	7.32848e-14	Up	0	0	0	16.6747	37.2705	0
circRNA_10607|Chr14:87044014_87044208_-	53.9453	0	114.913	6.8444	7.647	2.05725e-14	7.32848e-14	Up	0	0	0	16.6747	37.2705	0
circRNA_03084|Chr04:14722862_14723026_-	0	56.3384	0.00945259	-6.72507	-7.59567	3.06212e-14	1.06469e-13	Down	17.5935	0	38.7449	0	0	0
circRNA_07064|Chr09:18983465_18987044_-	0	56.3384	0.00945259	-6.72507	-7.59567	3.06212e-14	1.06469e-13	Down	17.5935	0	38.7449	0	0	0
circRNA_07834|Chr10:37538710_37543544_+	0	56.3384	0.00945259	-6.72507	-7.59567	3.06212e-14	1.06469e-13	Down	17.5935	0	38.7449	0	0	0
circRNA_11106|Chr15:61485571_61488468_-	0	56.3384	0.00945259	-6.72507	-7.59567	3.06212e-14	1.06469e-13	Down	17.5935	0	38.7449	0	0	0
circRNA_04693|Chr06:15295334_15295834_+	52.965	0	112.825	6.81794	7.58259	3.38712e-14	1.16695e-13	Up	0	0	0	25.0121	27.9529	0
circRNA_01698|Chr02:73000225_73002060_-	0	56.0303	0.00950458	-6.71716	-7.57633	3.55461e-14	1.21139e-13	Down	0	17.2854	38.7449	0	0	0
circRNA_05758|Chr07:96606038_96606162_-	0	56.0303	0.00950458	-6.71716	-7.57633	3.55461e-14	1.21139e-13	Down	0	17.2854	38.7449	0	0	0
circRNA_08240|Chr11:1889043_1898558_-	0	56.0303	0.00950458	-6.71716	-7.57633	3.55461e-14	1.21139e-13	Down	0	17.2854	38.7449	0	0	0
circRNA_02383|Chr03:31645949_31684608_+	0	55.449	0.00960422	-6.70212	-7.53968	4.71129e-14	1.59122e-13	Down	26.3903	0	29.0587	0	0	0
circRNA_10786|Chr14:139400914_139408012_-	0	55.449	0.00960422	-6.70212	-7.53968	4.71129e-14	1.59122e-13	Down	26.3903	0	29.0587	0	0	0
circRNA_02678|Chr03:122286886_122287931_+	52.1377	0	111.062	6.79523	7.52765	5.16632e-14	1.73251e-13	Up	0	0	0	33.3495	0	18.7882
circRNA_10863|Chr15:2895711_2900894_-	52.1377	0	111.062	6.79523	7.52765	5.16632e-14	1.73251e-13	Up	0	0	0	33.3495	0	18.7882
circRNA_03607|Chr04:182673416_182699014_-	266.723	130.411	2.17837	1.12325	7.52444	5.29467e-14	1.76614e-13	Up	43.9839	86.4268	0	116.723	37.2705	112.729
circRNA_00868|Chr01:229043075_229043407_-	51.9847	0	110.737	6.79099	7.51743	5.58637e-14	1.82791e-13	Up	0	0	0	33.3495	18.6353	0
circRNA_01522|Chr02:49863927_49879099_-	51.9847	0	110.737	6.79099	7.51743	5.58637e-14	1.82791e-13	Up	0	0	0	33.3495	18.6353	0
circRNA_02267|Chr03:15516590_15517282_+	51.9847	0	110.737	6.79099	7.51743	5.58637e-14	1.82791e-13	Up	0	0	0	33.3495	18.6353	0
circRNA_03073|Chr04:12853707_12855638_-	51.9847	0	110.737	6.79099	7.51743	5.58637e-14	1.82791e-13	Up	0	0	0	33.3495	18.6353	0
circRNA_03825|Chr04:218739572_218740278_-	51.9847	0	110.737	6.79099	7.51743	5.58637e-14	1.82791e-13	Up	0	0	0	33.3495	18.6353	0
circRNA_05171|Chr06:103260710_103304816_+	51.9847	0	110.737	6.79099	7.51743	5.58637e-14	1.82791e-13	Up	0	0	0	33.3495	18.6353	0
circRNA_05312|Chr06:148690307_148695211_+	51.9847	0	110.737	6.79099	7.51743	5.58637e-14	1.82791e-13	Up	0	0	0	33.3495	18.6353	0
circRNA_05537|Chr07:72800059_72813645_+	51.9847	0	110.737	6.79099	7.51743	5.58637e-14	1.82791e-13	Up	0	0	0	33.3495	18.6353	0
circRNA_07099|Chr09:29805891_29806040_+	51.9847	0	110.737	6.79099	7.51743	5.58637e-14	1.82791e-13	Up	0	0	0	33.3495	18.6353	0
circRNA_09534|Chr13:74625010_74627248_+	51.9847	0	110.737	6.79099	7.51743	5.58637e-14	1.82791e-13	Up	0	0	0	33.3495	18.6353	0
circRNA_00657|Chr01:197250836_197250985_-	0	54.5595	0.00976079	-6.67879	-7.48312	7.25788e-14	2.32646e-13	Down	35.1871	0	19.3724	0	0	0
circRNA_09868|Chr13:122450610_122450817_-	0	54.5595	0.00976079	-6.67879	-7.48312	7.25788e-14	2.32646e-13	Down	35.1871	0	19.3724	0	0	0
circRNA_10639|Chr14:89791345_89793103_+	0	53.9432	0.00987232	-6.6624	-7.44358	9.79909e-14	3.12512e-13	Down	0	34.5707	19.3724	0	0	0
circRNA_09789|Chr13:110519773_110527716_+	168.824	64.2458	2.79883	1.48482	7.43095	1.07823e-13	3.42709e-13	Up	35.1871	0	29.0587	75.0363	18.6353	75.1527
circRNA_08104|Chr10:158745672_158750954_+	25.0121	112.369	0.237078	-2.07657	-7.41362	1.22897e-13	3.88008e-13	Down	17.5935	17.2854	77.4898	25.0121	0	0
circRNA_02553|Chr03:66840948_66841188_-	0	52.4725	0.010149	-6.62252	-7.34807	2.01092e-13	6.25473e-13	Down	35.1871	17.2854	0	0	0	0
circRNA_05357|Chr06:170792948_170793142_+	0	52.4725	0.010149	-6.62252	-7.34807	2.01092e-13	6.25473e-13	Down	35.1871	17.2854	0	0	0	0
circRNA_08173|Chr10:182344703_182346294_-	0	52.4725	0.010149	-6.62252	-7.34807	2.01092e-13	6.25473e-13	Down	35.1871	17.2854	0	0	0	0
circRNA_08793|Chr11:119429213_119429506_-	0	52.4725	0.010149	-6.62252	-7.34807	2.01092e-13	6.25473e-13	Down	35.1871	17.2854	0	0	0	0
circRNA_00241|Chr01:40314864_40315092_+	0	52.1643	0.010209	-6.61402	-7.32784	2.33892e-13	7.11093e-13	Down	17.5935	34.5707	0	0	0	0
circRNA_00942|Chr01:242884452_242884781_-	0	52.1643	0.010209	-6.61402	-7.32784	2.33892e-13	7.11093e-13	Down	17.5935	34.5707	0	0	0	0
circRNA_02627|Chr03:98736238_98736585_-	0	52.1643	0.010209	-6.61402	-7.32784	2.33892e-13	7.11093e-13	Down	17.5935	34.5707	0	0	0	0
circRNA_03547|Chr04:160340421_160358620_+	0	52.1643	0.010209	-6.61402	-7.32784	2.33892e-13	7.11093e-13	Down	17.5935	34.5707	0	0	0	0
circRNA_04570|Chr05:210537577_210539735_-	0	52.1643	0.010209	-6.61402	-7.32784	2.33892e-13	7.11093e-13	Down	17.5935	34.5707	0	0	0	0
circRNA_05629|Chr07:80093547_80093747_+	0	52.1643	0.010209	-6.61402	-7.32784	2.33892e-13	7.11093e-13	Down	17.5935	34.5707	0	0	0	0
circRNA_06745|Chr08:177428208_177431408_-	0	52.1643	0.010209	-6.61402	-7.32784	2.33892e-13	7.11093e-13	Down	17.5935	34.5707	0	0	0	0
circRNA_08155|Chr10:180253595_180278045_-	0	52.1643	0.010209	-6.61402	-7.32784	2.33892e-13	7.11093e-13	Down	17.5935	34.5707	0	0	0	0
circRNA_08281|Chr11:10801478_10805186_-	0	52.1643	0.010209	-6.61402	-7.32784	2.33892e-13	7.11093e-13	Down	17.5935	34.5707	0	0	0	0
circRNA_08848|Chr11:124921302_124938742_-	0	52.1643	0.010209	-6.61402	-7.32784	2.33892e-13	7.11093e-13	Down	17.5935	34.5707	0	0	0	0
circRNA_09177|Chr12:117800758_117801847_-	37.2705	134.739	0.294617	-1.76309	-7.27773	3.39474e-13	1.01093e-12	Down	52.7806	43.2134	38.7449	0	37.2705	0
circRNA_01672|Chr02:68722077_68722364_+	46.8175	0	99.7296	6.63995	7.16034	8.04749e-13	2.37401e-12	Up	0	0	0	0	18.6353	28.1823
circRNA_05278|Chr06:139536802_139547050_+	46.8175	0	99.7296	6.63995	7.16034	8.04749e-13	2.37401e-12	Up	0	0	0	0	18.6353	28.1823
circRNA_11265|Chr15:112187349_112207589_+	46.8175	0	99.7296	6.63995	7.16034	8.04749e-13	2.37401e-12	Up	0	0	0	0	18.6353	28.1823
circRNA_04631|Chr06:5493669_5496099_-	46.7411	0	99.5667	6.63759	7.15488	8.3748e-13	2.44384e-12	Up	0	0	0	0	27.9529	18.7882
circRNA_06201|Chr07:226992257_226997198_+	46.7411	0	99.5667	6.63759	7.15488	8.3748e-13	2.44384e-12	Up	0	0	0	0	27.9529	18.7882
circRNA_07433|Chr09:123542700_123543204_+	46.7411	0	99.5667	6.63759	7.15488	8.3748e-13	2.44384e-12	Up	0	0	0	0	27.9529	18.7882
circRNA_09019|Chr12:33405125_33408287_+	46.7411	0	99.5667	6.63759	7.15488	8.3748e-13	2.44384e-12	Up	0	0	0	0	27.9529	18.7882
circRNA_00602|Chr01:191904129_191906289_+	87.6006	19.3724	4.81624	2.26791	7.13705	9.53577e-13	2.76128e-12	Up	0	0	19.3724	50.0242	0	37.5764
circRNA_10503|Chr14:63356976_63359404_+	16.6747	89.8656	0.197629	-2.33913	-7.13568	9.63126e-13	2.7804e-12	Down	17.5935	43.2134	29.0587	16.6747	0	0
circRNA_03377|Chr04:109087613_109101281_-	86.5439	19.3724	4.75814	2.2504	7.06049	1.6592e-12	4.76076e-12	Up	0	0	19.3724	58.3616	0	28.1823
circRNA_00896|Chr01:237463473_237464300_+	44.857	0	95.5534	6.57823	7.01833	2.24536e-12	6.41337e-12	Up	0	0	0	16.6747	0	28.1823
circRNA_01861|Chr02:105060573_105061694_+	44.857	0	95.5534	6.57823	7.01833	2.24536e-12	6.41337e-12	Up	0	0	0	16.6747	0	28.1823
circRNA_07295|Chr09:82946267_82948499_+	55.9058	163.917	0.363261	-1.46092	-7.00947	2.39215e-12	6.80178e-12	Down	0	86.4268	77.4898	0	55.9058	0
circRNA_10033|Chr13:137792426_137792597_+	44.6276	0	95.0647	6.57084	7.00146	2.53309e-12	7.1594e-12	Up	0	0	0	16.6747	27.9529	0
circRNA_10758|Chr14:133552268_133552438_-	44.6276	0	95.0647	6.57084	7.00146	2.53309e-12	7.1594e-12	Up	0	0	0	16.6747	27.9529	0
circRNA_11235|Chr15:105663110_105675317_+	44.6276	0	95.0647	6.57084	7.00146	2.53309e-12	7.1594e-12	Up	0	0	0	16.6747	27.9529	0
circRNA_02436|Chr03:39238489_39239928_+	113.287	34.5707	3.49026	1.80333	6.99513	2.65015e-12	7.44567e-12	Up	0	34.5707	0	66.699	46.5882	0
circRNA_04616|Chr06:2881390_2881548_+	68.6595	185.103	0.395069	-1.33982	-6.97649	3.02642e-12	8.47757e-12	Down	43.9839	34.5707	106.548	50.0242	18.6353	0
circRNA_09396|Chr12:167411019_167448560_+	133.398	286.931	0.495173	-1.014	-6.95717	3.47168e-12	9.69605e-12	Down	131.952	0	154.98	133.398	0	0
circRNA_00135|Chr01:21539222_21539797_-	0	46.6522	0.0114152	-6.4529	-6.95248	3.58909e-12	9.95037e-12	Down	17.5935	0	29.0587	0	0	0
circRNA_03899|Chr04:234294320_234294618_+	0	46.6522	0.0114152	-6.4529	-6.95248	3.58909e-12	9.95037e-12	Down	17.5935	0	29.0587	0	0	0
circRNA_09288|Chr12:147513665_147519002_-	0	46.6522	0.0114152	-6.4529	-6.95248	3.58909e-12	9.95037e-12	Down	17.5935	0	29.0587	0	0	0
circRNA_09677|Chr13:93295125_93319576_-	0	46.6522	0.0114152	-6.4529	-6.95248	3.58909e-12	9.95037e-12	Down	17.5935	0	29.0587	0	0	0
circRNA_06050|Chr07:177813382_177829150_-	43.8003	0	93.3024	6.54384	6.94015	3.91686e-12	1.07799e-11	Up	0	0	0	25.0121	0	18.7882
circRNA_04102|Chr05:24746518_24746745_+	0	46.344	0.0114911	-6.44334	-6.93069	4.18797e-12	1.14759e-11	Down	0	17.2854	29.0587	0	0	0
circRNA_10496|Chr14:61902967_61903121_+	0	46.344	0.0114911	-6.44334	-6.93069	4.18797e-12	1.14759e-11	Down	0	17.2854	29.0587	0	0	0
circRNA_00820|Chr01:223849836_223850009_-	43.6474	0	92.9766	6.5388	6.92874	4.24613e-12	1.15514e-11	Up	0	0	0	25.0121	18.6353	0
circRNA_03420|Chr04:121432108_121434307_-	43.6474	0	92.9766	6.5388	6.92874	4.24613e-12	1.15514e-11	Up	0	0	0	25.0121	18.6353	0
circRNA_10664|Chr14:93299132_93299287_+	43.6474	0	92.9766	6.5388	6.92874	4.24613e-12	1.15514e-11	Up	0	0	0	25.0121	18.6353	0
circRNA_07318|Chr09:87441922_87476077_-	35.31	124.934	0.301026	-1.73204	-6.92157	4.46664e-12	1.20817e-11	Down	105.561	0	19.3724	16.6747	18.6353	0
circRNA_02411|Chr03:35713709_35714891_+	0	45.7628	0.0116371	-6.42513	-6.88933	5.60567e-12	1.50977e-11	Down	26.3903	0	19.3724	0	0	0
circRNA_05190|Chr06:110284376_110284894_+	0	45.7628	0.0116371	-6.42513	-6.88933	5.60567e-12	1.50977e-11	Down	26.3903	0	19.3724	0	0	0
circRNA_05471|Chr06:206066364_206066521_+	0	45.3005	0.0117558	-6.41048	-6.8562	7.07176e-12	1.89114e-11	Down	0	25.9281	19.3724	0	0	0
circRNA_00068|Chr01:12366688_12367807_-	25.0121	103.418	0.257597	-1.95681	-6.84256	7.77927e-12	2.07447e-11	Down	0	25.9281	77.4898	25.0121	0	0
circRNA_00162|Chr01:23687032_23687568_-	37.5764	126.986	0.31517	-1.6658	-6.78883	1.13049e-11	2.99769e-11	Down	43.9839	34.5707	48.4311	0	0	37.5764
circRNA_04393|Chr05:151158021_151158900_-	79.2632	17.5935	4.79848	2.26258	6.77915	1.20884e-11	3.19647e-11	Up	17.5935	0	0	41.6869	0	37.5764
circRNA_05671|Chr07:83284997_83285224_-	52.965	154.265	0.365684	-1.45133	-6.76649	1.31946e-11	3.47926e-11	Down	61.5774	34.5707	58.1173	25.0121	27.9529	0
circRNA_09363|Chr12:161590650_161591007_-	78.9574	17.5935	4.77997	2.257	6.75591	1.41944e-11	3.73247e-11	Up	17.5935	0	0	41.6869	37.2705	0
circRNA_05375|Chr06:181714962_181784484_-	0	43.6757	0.0121931	-6.35779	-6.73802	1.60555e-11	4.18684e-11	Down	26.3903	17.2854	0	0	0	0
circRNA_07370|Chr09:103987897_103989471_+	0	43.6757	0.0121931	-6.35779	-6.73802	1.60555e-11	4.18684e-11	Down	26.3903	17.2854	0	0	0	0
circRNA_08667|Chr11:94211974_94212304_+	0	43.6757	0.0121931	-6.35779	-6.73802	1.60555e-11	4.18684e-11	Down	26.3903	17.2854	0	0	0	0
circRNA_02980|Chr03:227383626_227384832_-	0	43.5216	0.0122363	-6.35269	-6.72667	1.73585e-11	4.48328e-11	Down	17.5935	25.9281	0	0	0	0
circRNA_10111|Chr13:149305106_149305428_-	0	43.5216	0.0122363	-6.35269	-6.72667	1.73585e-11	4.48328e-11	Down	17.5935	25.9281	0	0	0	0
circRNA_07473|Chr09:142760761_142771051_-	127.659	46.344	2.93388	1.55281	6.67799	2.42245e-11	6.23104e-11	Up	0	17.2854	29.0587	25.0121	83.8587	18.7882
circRNA_08146|Chr10:176663010_176663190_+	18.6353	87.0432	0.228027	-2.13272	-6.63623	3.21812e-11	8.25518e-11	Down	35.1871	51.8561	0	0	18.6353	0
circRNA_03913|Chr04:235469959_235475330_-	205.483	100.287	2.18231	1.12586	6.61588	3.69349e-11	9.44892e-11	Up	0	51.8561	48.4311	75.0363	130.447	0
circRNA_07342|Chr09:93846306_93847266_+	33.3495	115.675	0.307069	-1.70336	-6.58243	4.62836e-11	1.17767e-10	Down	70.3742	25.9281	19.3724	33.3495	0	0
circRNA_06547|Chr08:102739170_102753303_-	16.6747	81.9583	0.216696	-2.20625	-6.57708	4.79768e-11	1.21748e-10	Down	0	43.2134	38.7449	16.6747	0	0
circRNA_05452|Chr06:201982449_201982724_+	110.31	36.6578	3.20504	1.68034	6.57039	5.01833e-11	1.27005e-10	Up	0	17.2854	19.3724	16.6747	37.2705	56.3645
circRNA_04118|Chr05:27371860_27373590_+	198.738	96.3022	2.19801	1.1362	6.55429	5.59054e-11	1.40358e-10	Up	70.3742	25.9281	0	58.3616	65.2234	75.1527
circRNA_02552|Chr03:66646937_66647105_-	16.6747	81.223	0.218658	-2.19325	-6.5236	6.86392e-11	1.71871e-10	Down	17.5935	34.5707	29.0587	16.6747	0	0
circRNA_00343|Chr01:113559950_113580018_-	91.2158	26.3903	3.68138	1.88025	6.45764	1.06346e-10	2.64187e-10	Up	26.3903	0	0	16.6747	74.541	0
circRNA_08490|Chr11:71054433_71054598_+	18.6353	84.5077	0.234869	-2.09007	-6.45562	1.07776e-10	2.66337e-10	Down	26.3903	0	58.1173	0	18.6353	0
circRNA_00688|Chr01:200550426_200550767_+	37.4234	0	79.7185	6.31684	6.44099	1.187e-10	2.88053e-10	Up	0	0	0	0	18.6353	18.7882
circRNA_00789|Chr01:220500907_220501086_+	37.4234	0	79.7185	6.31684	6.44099	1.187e-10	2.88053e-10	Up	0	0	0	0	18.6353	18.7882
circRNA_01429|Chr02:37976009_37982527_+	37.4234	0	79.7185	6.31684	6.44099	1.187e-10	2.88053e-10	Up	0	0	0	0	18.6353	18.7882
circRNA_01568|Chr02:56186114_56195646_+	37.4234	0	79.7185	6.31684	6.44099	1.187e-10	2.88053e-10	Up	0	0	0	0	18.6353	18.7882
circRNA_02142|Chr02:225601977_225619620_+	37.4234	0	79.7185	6.31684	6.44099	1.187e-10	2.88053e-10	Up	0	0	0	0	18.6353	18.7882
circRNA_02152|Chr02:225778685_225798753_-	37.4234	0	79.7185	6.31684	6.44099	1.187e-10	2.88053e-10	Up	0	0	0	0	18.6353	18.7882
circRNA_03814|Chr04:218737799_218738321_-	37.4234	0	79.7185	6.31684	6.44099	1.187e-10	2.88053e-10	Up	0	0	0	0	18.6353	18.7882
circRNA_05531|Chr07:72781115_72791528_+	37.4234	0	79.7185	6.31684	6.44099	1.187e-10	2.88053e-10	Up	0	0	0	0	18.6353	18.7882
circRNA_05952|Chr07:137089089_137186008_+	37.4234	0	79.7185	6.31684	6.44099	1.187e-10	2.88053e-10	Up	0	0	0	0	18.6353	18.7882
circRNA_06743|Chr08:176709488_176710332_-	37.4234	0	79.7185	6.31684	6.44099	1.187e-10	2.88053e-10	Up	0	0	0	0	18.6353	18.7882
circRNA_07977|Chr10:109968244_109969273_+	37.4234	0	79.7185	6.31684	6.44099	1.187e-10	2.88053e-10	Up	0	0	0	0	18.6353	18.7882
circRNA_08321|Chr11:14287603_14287881_-	37.4234	0	79.7185	6.31684	6.44099	1.187e-10	2.88053e-10	Up	0	0	0	0	18.6353	18.7882
circRNA_10621|Chr14:88632586_88632756_-	37.4234	0	79.7185	6.31684	6.44099	1.187e-10	2.88053e-10	Up	0	0	0	0	18.6353	18.7882
circRNA_11292|Chr15:121395580_121395947_+	46.9704	136.399	0.366775	-1.44703	-6.34829	2.17723e-10	5.19015e-10	Down	87.9677	0	48.4311	0	0	46.9704
circRNA_09953|Chr13:132322178_132368488_-	103.969	35.1871	3.14708	1.65402	6.30749	2.83598e-10	6.7435e-10	Up	35.1871	0	0	66.699	37.2705	0
circRNA_07817|Chr10:33273693_33275741_+	72.5805	17.2854	4.47226	2.161	6.30585	2.86624e-10	6.79832e-10	Up	0	17.2854	0	16.6747	55.9058	0
circRNA_02075|Chr02:192629800_192630009_-	35.4629	0	75.5423	6.23921	6.27682	3.4557e-10	8.05478e-10	Up	0	0	0	16.6747	0	18.7882
circRNA_02443|Chr03:41144541_41146121_-	35.4629	0	75.5423	6.23921	6.27682	3.4557e-10	8.05478e-10	Up	0	0	0	16.6747	0	18.7882
circRNA_06814|Chr08:202868333_202868605_+	35.4629	0	75.5423	6.23921	6.27682	3.4557e-10	8.05478e-10	Up	0	0	0	16.6747	0	18.7882
circRNA_07820|Chr10:33488821_33490061_+	35.4629	0	75.5423	6.23921	6.27682	3.4557e-10	8.05478e-10	Up	0	0	0	16.6747	0	18.7882
circRNA_07931|Chr10:86914296_86914602_-	35.4629	0	75.5423	6.23921	6.27682	3.4557e-10	8.05478e-10	Up	0	0	0	16.6747	0	18.7882
circRNA_07960|Chr10:99042608_99042750_-	35.4629	0	75.5423	6.23921	6.27682	3.4557e-10	8.05478e-10	Up	0	0	0	16.6747	0	18.7882
circRNA_08505|Chr11:72607624_72607867_-	35.4629	0	75.5423	6.23921	6.27682	3.4557e-10	8.05478e-10	Up	0	0	0	16.6747	0	18.7882
circRNA_08843|Chr11:124744139_124744902_-	35.4629	0	75.5423	6.23921	6.27682	3.4557e-10	8.05478e-10	Up	0	0	0	16.6747	0	18.7882
circRNA_09278|Chr12:147244957_147245125_-	35.4629	0	75.5423	6.23921	6.27682	3.4557e-10	8.05478e-10	Up	0	0	0	16.6747	0	18.7882
circRNA_09777|Chr13:110446020_110446187_-	35.4629	0	75.5423	6.23921	6.27682	3.4557e-10	8.05478e-10	Up	0	0	0	16.6747	0	18.7882
circRNA_10037|Chr13:137792430_137792627_+	35.4629	0	75.5423	6.23921	6.27682	3.4557e-10	8.05478e-10	Up	0	0	0	16.6747	0	18.7882
circRNA_01503|Chr02:48625174_48625442_-	35.31	0	75.2165	6.23298	6.26378	3.75765e-10	8.50652e-10	Up	0	0	0	16.6747	18.6353	0
circRNA_02534|Chr03:64706925_64707116_-	35.31	0	75.2165	6.23298	6.26378	3.75765e-10	8.50652e-10	Up	0	0	0	16.6747	18.6353	0
circRNA_03755|Chr04:210832161_210832319_-	35.31	0	75.2165	6.23298	6.26378	3.75765e-10	8.50652e-10	Up	0	0	0	16.6747	18.6353	0
circRNA_03951|Chr05:10918762_10919525_-	35.31	0	75.2165	6.23298	6.26378	3.75765e-10	8.50652e-10	Up	0	0	0	16.6747	18.6353	0
circRNA_04119|Chr05:27371860_27373610_+	35.31	0	75.2165	6.23298	6.26378	3.75765e-10	8.50652e-10	Up	0	0	0	16.6747	18.6353	0
circRNA_04536|Chr05:202998415_202998806_-	35.31	0	75.2165	6.23298	6.26378	3.75765e-10	8.50652e-10	Up	0	0	0	16.6747	18.6353	0
circRNA_06497|Chr08:51141670_51147374_-	35.31	0	75.2165	6.23298	6.26378	3.75765e-10	8.50652e-10	Up	0	0	0	16.6747	18.6353	0
circRNA_07088|Chr09:20421476_20423662_+	35.31	0	75.2165	6.23298	6.26378	3.75765e-10	8.50652e-10	Up	0	0	0	16.6747	18.6353	0
circRNA_07883|Chr10:57536352_57548630_+	35.31	0	75.2165	6.23298	6.26378	3.75765e-10	8.50652e-10	Up	0	0	0	16.6747	18.6353	0
circRNA_08861|Chr11:128525333_128528212_+	35.31	0	75.2165	6.23298	6.26378	3.75765e-10	8.50652e-10	Up	0	0	0	16.6747	18.6353	0
circRNA_08973|Chr12:9954956_9956135_+	35.31	0	75.2165	6.23298	6.26378	3.75765e-10	8.50652e-10	Up	0	0	0	16.6747	18.6353	0
circRNA_10524|Chr14:70268163_70270641_-	35.31	0	75.2165	6.23298	6.26378	3.75765e-10	8.50652e-10	Up	0	0	0	16.6747	18.6353	0
circRNA_11149|Chr15:83025214_83031424_+	35.31	0	75.2165	6.23298	6.26378	3.75765e-10	8.50652e-10	Up	0	0	0	16.6747	18.6353	0
circRNA_02684|Chr03:131513996_131526304_-	72.5805	17.5935	4.39392	2.13551	6.25905	3.87334e-10	8.62367e-10	Up	17.5935	0	0	16.6747	55.9058	0
circRNA_03041|Chr04:8784517_8809307_-	71.9826	17.2854	4.43541	2.14907	6.25806	3.89796e-10	8.65807e-10	Up	0	17.2854	0	25.0121	0	46.9704
circRNA_02198|Chr03:7215107_7215333_+	18.7882	81.9583	0.244162	-2.03409	-6.24752	4.1701e-10	9.24079e-10	Down	0	43.2134	38.7449	0	0	18.7882
circRNA_00680|Chr01:200010786_200011025_+	0	36.966	0.0144063	-6.11715	-6.21822	5.02817e-10	1.1013e-09	Down	17.5935	0	19.3724	0	0	0
circRNA_00947|Chr01:244207707_244208370_+	0	36.966	0.0144063	-6.11715	-6.21822	5.02817e-10	1.1013e-09	Down	17.5935	0	19.3724	0	0	0
circRNA_01257|Chr02:13581739_13581891_+	0	36.966	0.0144063	-6.11715	-6.21822	5.02817e-10	1.1013e-09	Down	17.5935	0	19.3724	0	0	0
circRNA_02901|Chr03:215207784_215209540_+	0	36.966	0.0144063	-6.11715	-6.21822	5.02817e-10	1.1013e-09	Down	17.5935	0	19.3724	0	0	0
circRNA_03426|Chr04:123055495_123055798_-	0	36.966	0.0144063	-6.11715	-6.21822	5.02817e-10	1.1013e-09	Down	17.5935	0	19.3724	0	0	0
circRNA_04250|Chr05:98543916_98568124_-	0	36.966	0.0144063	-6.11715	-6.21822	5.02817e-10	1.1013e-09	Down	17.5935	0	19.3724	0	0	0
circRNA_08283|Chr11:11164528_11164922_+	0	36.966	0.0144063	-6.11715	-6.21822	5.02817e-10	1.1013e-09	Down	17.5935	0	19.3724	0	0	0
circRNA_09102|Chr12:93101252_93111164_-	0	36.966	0.0144063	-6.11715	-6.21822	5.02817e-10	1.1013e-09	Down	17.5935	0	19.3724	0	0	0
circRNA_09794|Chr13:113287207_113290417_+	0	36.966	0.0144063	-6.11715	-6.21822	5.02817e-10	1.1013e-09	Down	17.5935	0	19.3724	0	0	0
circRNA_08525|Chr11:73210051_73212424_+	153.804	69.1415	2.36927	1.24445	6.19728	5.7448e-10	1.24383e-09	Up	0	69.1415	0	41.6869	74.541	37.5764
circRNA_01508|Chr02:48648374_48653990_-	18.7882	81.223	0.246372	-2.02109	-6.19361	5.88007e-10	1.2702e-09	Down	17.5935	34.5707	29.0587	0	0	18.7882
circRNA_00154|Chr01:23306448_23306958_+	0	36.6578	0.0145274	-6.10508	-6.19297	5.90409e-10	1.2567e-09	Down	0	17.2854	19.3724	0	0	0
circRNA_00782|Chr01:218637663_218638274_-	0	36.6578	0.0145274	-6.10508	-6.19297	5.90409e-10	1.2567e-09	Down	0	17.2854	19.3724	0	0	0
circRNA_03148|Chr04:25607029_25607475_+	0	36.6578	0.0145274	-6.10508	-6.19297	5.90409e-10	1.2567e-09	Down	0	17.2854	19.3724	0	0	0
circRNA_03391|Chr04:116004491_116004715_+	0	36.6578	0.0145274	-6.10508	-6.19297	5.90409e-10	1.2567e-09	Down	0	17.2854	19.3724	0	0	0
circRNA_04381|Chr05:146107885_146108400_+	0	36.6578	0.0145274	-6.10508	-6.19297	5.90409e-10	1.2567e-09	Down	0	17.2854	19.3724	0	0	0
circRNA_04511|Chr05:201942906_201943131_-	0	36.6578	0.0145274	-6.10508	-6.19297	5.90409e-10	1.2567e-09	Down	0	17.2854	19.3724	0	0	0
circRNA_05162|Chr06:100069054_100070768_-	0	36.6578	0.0145274	-6.10508	-6.19297	5.90409e-10	1.2567e-09	Down	0	17.2854	19.3724	0	0	0
circRNA_07062|Chr09:17109070_17109252_+	0	36.6578	0.0145274	-6.10508	-6.19297	5.90409e-10	1.2567e-09	Down	0	17.2854	19.3724	0	0	0
circRNA_07150|Chr09:52130062_52131818_+	0	36.6578	0.0145274	-6.10508	-6.19297	5.90409e-10	1.2567e-09	Down	0	17.2854	19.3724	0	0	0
circRNA_08402|Chr11:43833924_43835418_-	0	36.6578	0.0145274	-6.10508	-6.19297	5.90409e-10	1.2567e-09	Down	0	17.2854	19.3724	0	0	0
circRNA_09790|Chr13:110527835_110527986_-	0	36.6578	0.0145274	-6.10508	-6.19297	5.90409e-10	1.2567e-09	Down	0	17.2854	19.3724	0	0	0
circRNA_10953|Chr15:13162105_13162374_+	0	36.6578	0.0145274	-6.10508	-6.19297	5.90409e-10	1.2567e-09	Down	0	17.2854	19.3724	0	0	0
circRNA_05038|Chr06:72976697_73005270_-	74.9233	19.3724	4.11925	2.04238	6.18093	6.37254e-10	1.33385e-09	Up	0	0	19.3724	0	27.9529	46.9704
circRNA_03669|Chr04:187211538_187213508_+	70.9258	17.2854	4.3703	2.12773	6.17306	6.6981e-10	1.3989e-09	Up	0	17.2854	0	33.3495	0	37.5764
circRNA_06553|Chr08:102773358_102774426_-	33.3495	109.119	0.325517	-1.61919	-6.16653	6.98056e-10	1.45467e-09	Down	70.3742	0	38.7449	33.3495	0	0
circRNA_04722|Chr06:20205460_20213485_-	18.7882	80.4876	0.248623	-2.00797	-6.13942	8.2821e-10	1.71831e-09	Down	35.1871	25.9281	19.3724	0	0	18.7882
circRNA_10308|Chr14:19229396_19229598_+	37.5764	115.829	0.345528	-1.53312	-6.10607	1.02116e-09	2.11399e-09	Down	79.171	17.2854	19.3724	0	0	37.5764
circRNA_11332|Chr15:127668755_127692091_-	28.1823	98.2001	0.305668	-1.70996	-6.08126	1.19239e-09	2.46305e-09	Down	0	69.1415	29.0587	0	0	28.1823
circRNA_02903|Chr03:216670353_216673552_-	105.93	38.7449	2.91199	1.54201	6.05193	1.43123e-09	2.94995e-09	Up	0	0	38.7449	50.0242	55.9058	0
circRNA_06179|Chr07:224956274_224986814_-	33.3495	107.34	0.330912	-1.59548	-6.05129	1.43688e-09	2.95514e-09	Down	87.9677	0	19.3724	33.3495	0	0
circRNA_00842|Chr01:226316955_226341549_+	0	34.8789	0.0152684	-6.03331	-6.04453	1.49846e-09	3.03877e-09	Down	17.5935	17.2854	0	0	0	0
circRNA_03363|Chr04:96952738_96972004_+	0	34.8789	0.0152684	-6.03331	-6.04453	1.49846e-09	3.03877e-09	Down	17.5935	17.2854	0	0	0	0
circRNA_03435|Chr04:126237268_126239967_+	0	34.8789	0.0152684	-6.03331	-6.04453	1.49846e-09	3.03877e-09	Down	17.5935	17.2854	0	0	0	0
circRNA_05295|Chr06:143331981_143341594_+	0	34.8789	0.0152684	-6.03331	-6.04453	1.49846e-09	3.03877e-09	Down	17.5935	17.2854	0	0	0	0
circRNA_06544|Chr08:102706045_102739315_-	0	34.8789	0.0152684	-6.03331	-6.04453	1.49846e-09	3.03877e-09	Down	17.5935	17.2854	0	0	0	0
circRNA_07069|Chr09:19143448_19145329_-	0	34.8789	0.0152684	-6.03331	-6.04453	1.49846e-09	3.03877e-09	Down	17.5935	17.2854	0	0	0	0
circRNA_07404|Chr09:110157823_110157985_+	0	34.8789	0.0152684	-6.03331	-6.04453	1.49846e-09	3.03877e-09	Down	17.5935	17.2854	0	0	0	0
circRNA_07548|Chr09:186862428_186867399_-	0	34.8789	0.0152684	-6.03331	-6.04453	1.49846e-09	3.03877e-09	Down	17.5935	17.2854	0	0	0	0
circRNA_08444|Chr11:55570809_55572982_-	0	34.8789	0.0152684	-6.03331	-6.04453	1.49846e-09	3.03877e-09	Down	17.5935	17.2854	0	0	0	0
circRNA_08462|Chr11:61405583_61405781_-	0	34.8789	0.0152684	-6.03331	-6.04453	1.49846e-09	3.03877e-09	Down	17.5935	17.2854	0	0	0	0
circRNA_08933|Chr12:5450496_5457087_-	0	34.8789	0.0152684	-6.03331	-6.04453	1.49846e-09	3.03877e-09	Down	17.5935	17.2854	0	0	0	0
circRNA_10169|Chr13:166809484_166814468_+	0	34.8789	0.0152684	-6.03331	-6.04453	1.49846e-09	3.03877e-09	Down	17.5935	17.2854	0	0	0	0
circRNA_08960|Chr12:9435859_9459759_+	35.31	110.59	0.34007	-1.5561	-6.03166	1.62283e-09	3.24567e-09	Down	35.1871	17.2854	58.1173	16.6747	18.6353	0
circRNA_06165|Chr07:223680969_223681738_-	201.081	106.57	2.00966	1.00695	5.97532	2.29635e-09	4.57332e-09	Up	43.9839	43.2134	19.3724	41.6869	37.2705	122.123
circRNA_03897|Chr04:234269228_234294618_+	79.2632	181.972	0.463929	-1.10802	-5.95509	2.59931e-09	5.15494e-09	Down	43.9839	60.4988	77.4898	41.6869	0	37.5764
circRNA_00107|Chr01:19661405_19670254_+	56.3645	145.196	0.413464	-1.27417	-5.9429	2.8003e-09	5.54189e-09	Down	96.7645	0	48.4311	0	0	56.3645
circRNA_01029|Chr01:256201658_256206337_-	37.5764	112.677	0.355194	-1.49332	-5.90665	3.49137e-09	6.8807e-09	Down	35.1871	0	77.4898	0	0	37.5764
circRNA_06066|Chr07:184689236_184701513_-	110.616	43.2134	2.72636	1.44698	5.89965	3.64282e-09	7.16422e-09	Up	0	43.2134	0	16.6747	0	93.9409
circRNA_04734|Chr06:20996797_20997022_-	91.3687	199.293	0.488305	-1.03415	-5.89172	3.82185e-09	7.50068e-09	Down	105.561	25.9281	67.8036	16.6747	55.9058	18.7882
circRNA_04491|Chr05:196964331_196965594_-	124.718	52.7806	2.51675	1.33156	5.88144	4.06702e-09	7.96528e-09	Up	52.7806	0	0	50.0242	55.9058	18.7882
circRNA_09634|Chr13:87100887_87101097_-	157.317	75.7109	2.21311	1.14607	5.87154	4.31776e-09	8.43885e-09	Up	17.5935	0	58.1173	91.7111	18.6353	46.9704
circRNA_03604|Chr04:180763663_180764036_+	152.302	72.2721	2.24451	1.1664	5.85893	4.65857e-09	9.08613e-09	Up	0	43.2134	29.0587	58.3616	0	93.9409
circRNA_07060|Chr09:17038750_17039181_+	70.62	19.3724	3.88266	1.95704	5.83571	5.35622e-09	1.04253e-08	Up	0	0	19.3724	33.3495	37.2705	0
circRNA_08296|Chr11:13151530_13151851_+	81.8982	25.9281	3.36426	1.75029	5.82569	5.68763e-09	1.10476e-08	Up	0	25.9281	0	16.6747	65.2234	0
circRNA_07310|Chr09:86684408_86684981_+	16.6747	71.2286	0.249339	-2.00382	-5.76764	8.03874e-09	1.55823e-08	Down	0	51.8561	19.3724	16.6747	0	0
circRNA_10325|Chr14:22503199_22503673_-	27.9529	92.9963	0.320145	-1.6432	-5.75303	8.76574e-09	1.6922e-08	Down	17.5935	17.2854	58.1173	0	27.9529	0
circRNA_02902|Chr03:216662409_216698966_-	33.3495	102.682	0.345922	-1.53148	-5.74447	9.22089e-09	1.77643e-08	Down	17.5935	17.2854	67.8036	33.3495	0	0
circRNA_00555|Chr01:180880586_180892815_+	90.5414	194.229	0.496498	-1.01014	-5.70502	1.1633e-08	2.23656e-08	Down	114.358	60.4988	19.3724	25.0121	27.9529	37.5764
circRNA_01828|Chr02:92550741_92558495_-	16.6747	69.7578	0.254596	-1.97372	-5.65144	1.59106e-08	3.04657e-08	Down	35.1871	34.5707	0	16.6747	0	0
circRNA_07339|Chr09:93845087_93846112_+	162.447	82.4206	2.09924	1.06987	5.64394	1.66202e-08	3.17601e-08	Up	26.3903	17.2854	38.7449	50.0242	37.2705	75.1527
circRNA_07832|Chr10:37361024_37361684_-	18.6353	73.6238	0.269589	-1.89116	-5.6433	1.66826e-08	3.17827e-08	Down	17.5935	17.2854	38.7449	0	18.6353	0
circRNA_08055|Chr10:139371392_139372145_+	18.6353	73.6238	0.269589	-1.89116	-5.6433	1.66826e-08	3.17827e-08	Down	17.5935	17.2854	38.7449	0	18.6353	0
circRNA_03620|Chr04:183945794_184000520_+	53.1944	134.277	0.42194	-1.24489	-5.61206	1.99928e-08	3.79743e-08	Down	26.3903	69.1415	38.7449	25.0121	0	28.1823
circRNA_08217|Chr10:188213750_188294197_-	78.9574	25.9281	3.24346	1.69753	5.59866	2.1601e-08	4.09464e-08	Up	0	25.9281	0	41.6869	37.2705	0
circRNA_11187|Chr15:91061038_91063189_-	75.1527	168.707	0.474457	-1.07565	-5.59759	2.17348e-08	4.11175e-08	Down	35.1871	17.2854	116.235	0	0	75.1527
circRNA_05352|Chr06:170528775_170539265_+	27.9529	90.601	0.328609	-1.60556	-5.58467	2.34147e-08	4.41187e-08	Down	0	51.8561	38.7449	0	27.9529	0
circRNA_09164|Chr12:116602983_116603511_+	63.6452	17.2854	3.92168	1.97147	5.56688	2.59336e-08	4.87676e-08	Up	0	17.2854	0	16.6747	0	46.9704
circRNA_09069|Chr12:57834044_57835197_-	143.583	70.066	2.18263	1.12607	5.53048	3.1936e-08	5.98166e-08	Up	52.7806	17.2854	0	50.0242	46.5882	46.9704
circRNA_08450|Chr11:59314434_59320154_-	18.7882	72.2721	0.276885	-1.85264	-5.51404	3.50691e-08	6.55548e-08	Down	0	43.2134	29.0587	0	0	18.7882
circRNA_05137|Chr06:95482860_95483621_-	63.2629	17.5935	3.82985	1.93729	5.4863	4.10429e-08	7.64192e-08	Up	17.5935	0	0	16.6747	46.5882	0
circRNA_08140|Chr10:171121480_171128146_+	164.179	87.3514	2.00185	1.00134	5.37398	7.70163e-08	1.43117e-07	Up	52.7806	34.5707	0	33.3495	83.8587	46.9704
circRNA_06154|Chr07:219999291_219999855_-	61.3024	17.5935	3.71116	1.89187	5.31568	1.0626e-07	1.96879e-07	Up	17.5935	0	0	33.3495	27.9529	0
circRNA_08765|Chr11:111766409_111767162_+	61.3024	17.5935	3.71116	1.89187	5.31568	1.0626e-07	1.96879e-07	Up	17.5935	0	0	33.3495	27.9529	0
circRNA_06967|Chr09:4756643_4760129_-	56.0587	132.939	0.449135	-1.15478	-5.26138	1.42977e-07	2.6413e-07	Down	26.3903	0	106.548	0	37.2705	18.7882
circRNA_09760|Chr13:108010792_108015814_-	154.937	81.9583	2.01349	1.0097	5.2564	1.46899e-07	2.70846e-07	Up	0	43.2134	38.7449	33.3495	65.2234	56.3645
circRNA_08799|Chr11:120523926_120524333_-	112.613	51.8561	2.31299	1.20976	5.18573	2.15174e-07	3.92131e-07	Up	0	51.8561	0	75.0363	0	37.5764
circRNA_08351|Chr11:19346009_19351758_+	62.5885	19.3724	3.44109	1.78286	5.15822	2.49304e-07	4.52583e-07	Up	0	0	19.3724	25.0121	0	37.5764
circRNA_03229|Chr04:38849814_38855023_+	120.644	58.1173	2.21099	1.14469	5.13648	2.79933e-07	5.07211e-07	Up	0	0	58.1173	83.3737	37.2705	0
circRNA_02435|Chr03:39131063_39150320_-	86.5439	34.5707	2.66633	1.41485	5.1308	2.88515e-07	5.21758e-07	Up	0	34.5707	0	58.3616	0	28.1823
circRNA_09397|Chr12:168076017_168082595_-	28.1823	83.31	0.3603	-1.47273	-5.02656	4.99358e-07	8.94485e-07	Down	17.5935	17.2854	48.4311	0	0	28.1823
circRNA_03317|Chr04:61974065_61977627_-	46.5882	113.588	0.436848	-1.1948	-4.99696	5.82408e-07	1.04127e-06	Down	70.3742	43.2134	0	0	46.5882	0
circRNA_06367|Chr08:1705531_1705932_-	85.4872	35.1871	2.58764	1.37163	4.98078	6.33298e-07	1.13012e-06	Up	35.1871	0	0	66.699	0	18.7882
circRNA_00050|Chr01:6648433_6649794_+	70.7729	25.9281	2.90725	1.53966	4.94089	7.7765e-07	1.38249e-06	Up	0	25.9281	0	33.3495	18.6353	18.7882
circRNA_11102|Chr15:61163033_61163191_-	18.6353	64.6729	0.306901	-1.70415	-4.92307	8.51989e-07	1.5118e-06	Down	0	25.9281	38.7449	0	18.6353	0
circRNA_06178|Chr07:224956274_224986805_-	56.2116	17.2854	3.46364	1.79229	4.90616	9.28746e-07	1.64183e-06	Up	0	17.2854	0	0	18.6353	37.5764
circRNA_06235|Chr07:237461379_237462267_+	100.763	46.6522	2.30045	1.20192	4.88004	1.06067e-06	1.86456e-06	Up	17.5935	0	29.0587	16.6747	55.9058	28.1823
circRNA_00660|Chr01:197392517_197393853_+	70.62	26.3903	2.85016	1.51104	4.86791	1.12786e-06	1.979e-06	Up	26.3903	0	0	33.3495	37.2705	0
circRNA_10820|Chr14:158710826_158721318_-	56.2116	17.5935	3.40297	1.7668	4.85779	1.18701e-06	2.07892e-06	Up	17.5935	0	0	0	18.6353	37.5764
circRNA_02254|Chr03:13802321_13803851_-	18.6353	62.894	0.315582	-1.66392	-4.77341	1.81129e-06	3.15473e-06	Down	17.5935	25.9281	19.3724	0	18.6353	0
circRNA_08550|Chr11:74882200_74883052_+	84.3174	36.6578	2.44983	1.29268	4.72608	2.2889e-06	3.97192e-06	Up	0	17.2854	19.3724	0	27.9529	56.3645
circRNA_06759|Chr08:182221768_182310943_-	54.0982	17.2854	3.33342	1.737	4.70948	2.48355e-06	4.29391e-06	Up	0	17.2854	0	16.6747	18.6353	18.7882
circRNA_06622|Chr08:126834881_126837427_+	84.088	36.6578	2.44317	1.28875	4.70851	2.49537e-06	4.30645e-06	Up	0	17.2854	19.3724	0	55.9058	28.1823
circRNA_03195|Chr04:36418901_36423216_+	35.31	90.9092	0.413691	-1.27338	-4.69973	2.60507e-06	4.48756e-06	Down	17.5935	34.5707	38.7449	16.6747	18.6353	0
circRNA_03004|Chr04:4836082_4841552_-	53.9453	17.5935	3.26577	1.70742	4.64649	3.37629e-06	5.78443e-06	Up	17.5935	0	0	16.6747	37.2705	0
circRNA_03735|Chr04:205147373_205153010_+	53.9453	17.5935	3.26577	1.70742	4.64649	3.37629e-06	5.78443e-06	Up	17.5935	0	0	16.6747	37.2705	0
circRNA_05145|Chr06:97002857_97003951_+	53.9453	17.5935	3.26577	1.70742	4.64649	3.37629e-06	5.78443e-06	Up	17.5935	0	0	16.6747	37.2705	0
circRNA_03717|Chr04:201423856_201428966_+	53.1944	17.2854	3.27773	1.7127	4.62405	3.76312e-06	6.41804e-06	Up	0	17.2854	0	25.0121	0	28.1823
circRNA_08069|Chr10:151275102_151374753_-	53.1944	17.2854	3.27773	1.7127	4.62405	3.76312e-06	6.41804e-06	Up	0	17.2854	0	25.0121	0	28.1823
circRNA_04923|Chr06:63295790_63299845_-	55.9058	121.614	0.48962	-1.03027	-4.58756	4.48455e-06	7.60039e-06	Down	35.1871	86.4268	0	0	55.9058	0
circRNA_02612|Chr03:88895986_88896139_+	25.0121	71.2286	0.374009	-1.41886	-4.51971	6.19233e-06	1.04199e-05	Down	0	51.8561	19.3724	25.0121	0	0
circRNA_08156|Chr10:180256717_180282587_-	51.9847	17.2854	3.20319	1.67951	4.50845	6.53023e-06	1.09689e-05	Up	0	17.2854	0	33.3495	18.6353	0
circRNA_03568|Chr04:164268744_164268929_+	52.1377	17.5935	3.15634	1.65825	4.47439	7.66308e-06	1.28489e-05	Up	17.5935	0	0	33.3495	0	18.7882
circRNA_06013|Chr07:158229485_158231979_+	105.93	55.449	2.03475	1.02485	4.39951	1.08496e-05	1.80318e-05	Up	26.3903	0	29.0587	50.0242	55.9058	0
circRNA_08946|Chr12:7655146_7668377_+	37.2705	89.4385	0.44384	-1.17189	-4.36616	1.26451e-05	2.09789e-05	Down	52.7806	17.2854	19.3724	0	37.2705	0
circRNA_11060|Chr15:49549944_49551234_-	33.3495	82.4206	0.430962	-1.21437	-4.31137	1.62244e-05	2.67291e-05	Down	26.3903	17.2854	38.7449	33.3495	0	0
circRNA_09603|Chr13:84487221_84489478_+	51.9847	111.017	0.498738	-1.00365	-4.28955	1.79037e-05	2.94444e-05	Down	0	43.2134	67.8036	33.3495	18.6353	0
circRNA_11378|Chr15:139388966_139390419_+	52.965	19.3724	2.91199	1.54201	4.27896	1.87768e-05	3.08266e-05	Up	0	0	19.3724	25.0121	27.9529	0
circRNA_04594|Chr06:980389_991111_-	28.1823	72.7344	0.412688	-1.27688	-4.21263	2.52415e-05	4.12249e-05	Down	26.3903	17.2854	29.0587	0	0	28.1823
circRNA_03971|Chr05:13268216_13268453_-	37.5764	87.1973	0.458984	-1.12349	-4.16785	3.07483e-05	5.0132e-05	Down	43.9839	43.2134	0	0	0	37.5764
circRNA_01077|Chr01:257436753_257437074_+	74.694	34.8789	2.28091	1.18961	4.16725	3.083e-05	5.01785e-05	Up	17.5935	17.2854	0	0	55.9058	18.7882
circRNA_10049|Chr13:137793253_137793424_+	16.6747	52.3184	0.339462	-1.55868	-4.15328	3.27747e-05	5.32519e-05	Down	26.3903	25.9281	0	16.6747	0	0
circRNA_02562|Chr03:68149426_68186173_-	27.9529	71.5367	0.416182	-1.26471	-4.14673	3.37255e-05	5.46087e-05	Down	17.5935	34.5707	19.3724	0	27.9529	0
circRNA_01987|Chr02:156660398_156660907_+	16.6747	52.1643	0.340464	-1.55442	-4.13888	3.48998e-05	5.63651e-05	Down	17.5935	34.5707	0	16.6747	0	0
circRNA_09358|Chr12:160382087_160382629_-	16.6747	52.1643	0.340464	-1.55442	-4.13888	3.48998e-05	5.63651e-05	Down	17.5935	34.5707	0	16.6747	0	0
circRNA_10310|Chr14:19229566_19229716_+	65.4528	29.0587	2.39904	1.26246	4.08782	4.35449e-05	6.93193e-05	Up	0	0	29.0587	0	37.2705	28.1823
circRNA_09452|Chr13:38648577_38671277_-	65.3763	29.0587	2.39624	1.26077	4.08117	4.48104e-05	7.10942e-05	Up	0	0	29.0587	0	46.5882	18.7882
circRNA_03949|Chr05:10847270_10848530_+	18.7882	54.5595	0.366775	-1.44703	-4.01445	5.95844e-05	9.39027e-05	Down	35.1871	0	19.3724	0	0	18.7882
circRNA_05414|Chr06:191659354_191660045_+	25.0121	64.6729	0.41192	-1.27956	-3.97877	6.92729e-05	0.000108627	Down	0	25.9281	38.7449	25.0121	0	0
circRNA_02115|Chr02:222043741_222044176_-	37.5764	84.5077	0.473592	-1.07828	-3.96895	7.21909e-05	0.000112828	Down	26.3903	0	58.1173	0	0	37.5764
circRNA_09084|Chr12:62869063_62888115_-	70.7729	34.5707	2.18044	1.12462	3.8782	0.000105232	0.000163387	Up	0	34.5707	0	33.3495	18.6353	18.7882
circRNA_09871|Chr13:122515578_122516108_+	44.857	17.2854	2.764	1.46676	3.7948	0.000147765	0.00022663	Up	0	17.2854	0	16.6747	0	28.1823
circRNA_10072|Chr13:139566649_139580312_-	44.857	17.2854	2.764	1.46676	3.7948	0.000147765	0.00022663	Up	0	17.2854	0	16.6747	0	28.1823
circRNA_03218|Chr04:37163909_37164905_-	44.6276	17.2854	2.74986	1.45936	3.77082	0.00016271	0.000248943	Up	0	17.2854	0	16.6747	27.9529	0
circRNA_06296|Chr07:251319728_251325140_+	74.9233	38.7449	2.05963	1.04238	3.75164	0.000175682	0.000267922	Up	0	0	38.7449	0	27.9529	46.9704
circRNA_04653|Chr06:9595850_9596008_+	43.8003	17.2854	2.69888	1.43236	3.68379	0.000229792	0.000348192	Up	0	17.2854	0	25.0121	0	18.7882
circRNA_03939|Chr05:9287209_9290359_+	43.6474	17.2854	2.68946	1.42732	3.6676	0.000244833	0.000370389	Up	0	17.2854	0	25.0121	18.6353	0
circRNA_04471|Chr05:195953789_195953977_+	56.1352	26.3903	2.26556	1.17987	3.58898	0.000331979	0.000499026	Up	26.3903	0	0	0	27.9529	28.1823
circRNA_05322|Chr06:159046577_159052529_-	69.8691	36.6578	2.03004	1.02151	3.56317	0.000366402	0.000548151	Up	0	17.2854	19.3724	41.6869	0	28.1823
circRNA_10747|Chr14:133547358_133547523_+	16.6747	45.7628	0.38809	-1.36554	-3.51884	0.00043344	0.000645374	Down	26.3903	0	19.3724	16.6747	0	0
circRNA_06996|Chr09:7837955_7839248_+	27.9529	63.9376	0.465646	-1.10269	-3.51538	0.000439124	0.000652809	Down	17.5935	17.2854	29.0587	0	27.9529	0
circRNA_00607|Chr01:191904129_191921134_+	66.699	34.8789	2.03677	1.02628	3.49475	0.000474498	0.000702078	Up	17.5935	17.2854	0	66.699	0	0
circRNA_03601|Chr04:179530651_179533903_+	16.6747	45.3005	0.39205	-1.35089	-3.47227	0.000516079	0.000762408	Down	0	25.9281	19.3724	16.6747	0	0
circRNA_03117|Chr04:19598653_19599284_-	53.9453	25.9281	2.216	1.14796	3.44208	0.000577252	0.000850118	Up	0	25.9281	0	16.6747	37.2705	0
circRNA_11071|Chr15:51830341_51831577_-	27.9529	62.894	0.473372	-1.07895	-3.42557	0.000613512	0.00090211	Down	17.5935	25.9281	19.3724	0	27.9529	0
circRNA_02805|Chr03:186886622_186886824_-	43.8003	19.3724	2.40812	1.26791	3.35512	0.000793307	0.00116016	Up	0	0	19.3724	25.0121	0	18.7882
circRNA_06211|Chr07:227564279_227564440_-	43.8003	19.3724	2.40812	1.26791	3.35512	0.000793307	0.00116016	Up	0	0	19.3724	25.0121	0	18.7882
circRNA_07074|Chr09:20095044_20095398_-	18.6353	46.344	0.428279	-1.22338	-3.2516	0.00114756	0.00166149	Down	0	17.2854	29.0587	0	18.6353	0
circRNA_08661|Chr11:93707214_93707669_+	27.9529	60.807	0.48962	-1.03027	-3.24351	0.00118068	0.00170683	Down	17.5935	43.2134	0	0	27.9529	0
circRNA_05167|Chr06:102018355_102021009_+	56.1352	29.0587	2.05752	1.04091	3.24347	0.00118084	0.00170445	Up	0	0	29.0587	0	27.9529	28.1823
circRNA_01272|Chr02:16115688_16117006_+	18.6353	45.3005	0.438145	-1.19052	-3.14631	0.00165347	0.00234895	Down	0	25.9281	19.3724	0	18.6353	0
circRNA_02685|Chr03:131623842_131626125_+	18.6353	45.3005	0.438145	-1.19052	-3.14631	0.00165347	0.00234895	Down	0	25.9281	19.3724	0	18.6353	0
circRNA_06291|Chr07:249766305_249768213_+	37.4234	17.2854	2.30595	1.20536	2.9804	0.00287875	0.00399932	Up	0	17.2854	0	0	18.6353	18.7882
circRNA_09801|Chr13:115286632_115286780_+	37.4234	17.2854	2.30595	1.20536	2.9804	0.00287875	0.00399932	Up	0	17.2854	0	0	18.6353	18.7882
circRNA_01186|Chr02:1724435_1728128_-	18.6353	43.6757	0.454445	-1.13782	-2.9797	0.0028853	0.0039996	Down	26.3903	17.2854	0	0	18.6353	0
circRNA_11393|tig00066201:3356_5149_+	18.7882	43.6757	0.458174	-1.12603	-2.95486	0.00312814	0.0043172	Down	26.3903	17.2854	0	0	0	18.7882
circRNA_03242|Chr04:39490728_39497597_-	37.4234	17.5935	2.26556	1.17987	2.93028	0.00338659	0.00464335	Up	17.5935	0	0	0	18.6353	18.7882
circRNA_04346|Chr05:135334531_135334816_+	37.4234	17.5935	2.26556	1.17987	2.93028	0.00338659	0.00464335	Up	17.5935	0	0	0	18.6353	18.7882
circRNA_10434|Chr14:47315842_47321253_+	35.4629	17.2854	2.18515	1.12773	2.75118	0.00593808	0.00800792	Up	0	17.2854	0	16.6747	0	18.7882
circRNA_03941|Chr05:9298049_9299060_+	35.4629	17.5935	2.14688	1.10224	2.70089	0.00691537	0.00927947	Up	17.5935	0	0	16.6747	0	18.7882
circRNA_06551|Chr08:102773233_102774625_-	35.4629	17.5935	2.14688	1.10224	2.70089	0.00691537	0.00927947	Up	17.5935	0	0	16.6747	0	18.7882
circRNA_11196|Chr15:93654557_93727712_+	35.4629	17.5935	2.14688	1.10224	2.70089	0.00691537	0.00927947	Up	17.5935	0	0	16.6747	0	18.7882
circRNA_11385|Chr15:140094400_140108898_+	35.4629	17.5935	2.14688	1.10224	2.70089	0.00691537	0.00927947	Up	17.5935	0	0	16.6747	0	18.7882
circRNA_00037|Chr01:5041016_5047529_+	35.31	17.5935	2.13762	1.096	2.68272	0.0073027	0.00976451	Up	17.5935	0	0	16.6747	18.6353	0
circRNA_01185|Chr02:1724435_1724899_-	16.6747	36.966	0.480444	-1.05756	-2.58357	0.00977832	0.0129645	Down	17.5935	0	19.3724	16.6747	0	0
circRNA_04470|Chr05:195902878_195907736_-	16.6747	36.966	0.480444	-1.05756	-2.58357	0.00977832	0.0129645	Down	17.5935	0	19.3724	16.6747	0	0
circRNA_07496|Chr09:155593941_155598381_+	16.6747	36.966	0.480444	-1.05756	-2.58357	0.00977832	0.0129645	Down	17.5935	0	19.3724	16.6747	0	0
