# Supplementary material for: Genome-wide identification and characterization of circular RNAs for exogenous trehalose-mediated heat stress responses in tea plants (Camellia sinensis)
Source: Front Plant Sci. 2024 Dec 5;15:1481169. doi: 10.3389/fpls.2024.1481169 (PMC11655237; doi:10.3389/fpls.2024.1481169)
Supplement: Supplementary Table 5 — Correlation analysis of circRNAs and their host genes. [file Table5.xls]

## Sheet: Sheet1
circRNA	circRNA-ID	CK-RPB	T-RPB	TT-RPB		gene	geneID	CK-FPKM	T-FPKM	TT-FPKM		Pearson correlation coefficient
circKu70-1	circRNA_07193|Chr09:55283721_55284376_+	30.7312	112.677	84.088		CsKu70	CsTGY09G0001126	17.7079	23.6532	19.3308		0.909322
circKu70-2	circRNA_07195|Chr09:55286042_55288094_+	32.9726	0	61.5318		CsKu70	CsTGY09G0001126	17.7079	23.6532	19.3308		-0.732077
circKu70-3	circRNA_07196|Chr09:55293251_55294053_+	57.7021	377.056	403.291		CsKu70	CsTGY09G0001126	17.7079	23.6532	19.3308		0.661327
circRad50	circRNA_04393|Chr05:151158021_151158900_-	68.3398	17.5935	79.2632		CsRad50	CsTGY05G0001913	16.2825	15.699	13.9284		-0.434991
circDnl4	circRNA_08240|Chr11:1889043_1898558_-	0	56.0303	0		CsDnl4	CsTGY11G0000030	10.349	11.2464	12.9978		-0.182988
circMus81	circRNA_02671|Chr03:117015945_117016630_-	0	107.305	0		CsMus81	CsTGY03G0001823	5.75203	6.49977	5.69253		0.997811
